# Supplementary material
Source: PubMed Central journal article supplement (PMC6553635)
Supplement: NIHMS1029225-supplement-Supplemental_Information.pdf [file NIHMS1029225-supplement-Supplemental_Information.pdf]

## Supporting Information

### Exploiting an Asp-Glu “switch” in Glycogen Synthase Kinase 3 to design paralog selective inhibitors for use in acute myeloid leukemia

**Authors:** Florence F. Wagner<sup>1†\*</sup>, Lina Benajiba<sup>2,3,4†</sup>, Arthur J. Campbell<sup>1</sup>, Michel Weïwer<sup>1</sup>, Joshua R. Sacher<sup>1</sup>, Jennifer P. Gale<sup>1</sup>, Linda Ross<sup>3</sup>, Alexandre Puissant<sup>5</sup>, Gabriela Alexe<sup>2,3,6</sup>, Amy Conway<sup>3</sup>, Morgan Back<sup>2,3</sup>, Yana Pikman<sup>2,3</sup>, Ilene Galinsky<sup>7</sup>, Daniel J. DeAngelo<sup>7</sup>, Richard M. Stone<sup>7</sup>, Taner Kaya<sup>1</sup>, Xi Shi<sup>1</sup>, Matthew B. Robers<sup>8</sup>, Thomas Machleidt<sup>8</sup>, Jennifer Wilkinson<sup>8</sup>, Olivier Hermine<sup>9</sup>, Andrew Kung<sup>10</sup>, Adam J. Stein<sup>11</sup>, Damodharan Lakshminarasimhan<sup>12</sup>, Michael T. Hemann<sup>13</sup>, Edward Scolnick<sup>1</sup>, Yan-Ling Zhang<sup>1</sup>, Jen Q. Pan<sup>1</sup>, Kimberly Stegmaier<sup>2,3\*#</sup>, Edward B. Holson<sup>1,\*\*#</sup>

#### Table of Contents

|                                                                                                                                                                                                        |    |
|--------------------------------------------------------------------------------------------------------------------------------------------------------------------------------------------------------|----|
| Experimental conditions and parameters for X-ray co-crystal structures of hGSK3 $\beta$ with BRD0209, BRD3731 and BRD0705 (Xtal Biostructures) .....                                                   | 3  |
| Table S1. X-ray data reduction statistics for X-ray co-crystal structures of hGSK3 $\beta$ with BRD0209, BRD3731 and BRD0705. ....                                                                     | 4  |
| Table S2. Crystallographic refinement statistics for X-ray co-crystal structures of hGSK3 $\beta$ with BRD0209, BRD3731 and BRD0705. ....                                                              | 4  |
| Electron density map (SigmaA-weighted $2mF_o-DF_c$ , contoured at $1\sigma$ ) corresponding to the compound BRD0209(a), BRD0705(b) and BRD3731(c) bound to 2 GSK3 $\beta$ in the asymmetric unit. .... | 5  |
| Experimental conditions and parameters for X-ray co-crystal structures of GSK3 $\beta$ (D133E) with BRD0705 .....                                                                                      | 7  |
| Table S3. Final diffraction statistics for the mutant hGSK3B (D133E)/BRD0705 complex crystal used in structure determination. ....                                                                     | 9  |
| Table S4. Final refinement statistics for the mutant hGSK3B (D133E)/BRD0705 complex structure.....                                                                                                     | 9  |
| Experimental conditions for molecular dynamics simulations.....                                                                                                                                        | 10 |
| Synthesis and Characterization of Compounds .....                                                                                                                                                      | 12 |
| General Procedure for the Synthesis of Pyrazolodihydroquinolinones .....                                                                                                                               | 12 |
| Step 1: Example procedure for SEAr of Aminopyrazoles with Ketones.....                                                                                                                                 | 12 |
| Step 2: Example procedure for Condensation/Cyclization with Dimedone .....                                                                                                                             | 13 |
| <sup>1</sup> HNMR and LCMS data.....                                                                                                                                                                   | 23 |
| Supplementary Figures:.....                                                                                                                                                                            | 24 |

|                                                                                                                                                                                                                       |     |
|-----------------------------------------------------------------------------------------------------------------------------------------------------------------------------------------------------------------------|-----|
| Figure S1. GSK3 conservation across species.....                                                                                                                                                                      | 59  |
| Figure S2. X-ray crystal structure of GSK3 from <i>Ustilago Maydis</i> . ....                                                                                                                                         | 60  |
| Figure S3. Schematic of back end interactions depicting distance A between Glu196/Asp133 and Arg176/Arg113 and distance B between Arg176/Arg113 and Glu143/Glu80 for GSK3A and GSK3B respectively.....                | 61  |
| Figure S4. Hinge backend interaction measurements and energy plots .....                                                                                                                                              | 62  |
| Figure S5. X-ray crystal structures of <i>h</i> GSK3B bound to BRD3731 (panels 1-3) and BRD0705 (panels 4-6) and <i>h</i> GSK3B(D133E) bound to BRD0705 (panels 7-9). ....                                            | 67  |
| Figure S6. Live cell target engagement analysis for GSK3 $\alpha$ and GSK3 $\beta$ using NanoBRET (Promega).....                                                                                                      | 68  |
| Figure S7. (A) PAS staining and (B) quantitative dosage of glycogen synthase after BRD0705 treatment. ....                                                                                                            | 69  |
| Figure S8. BRD3731 induces heterogeneous effects on differentiation and colony formation in AML cell lines. ....                                                                                                      | 70  |
| Figure S9. BRD0705 triggers differentiation, impairs stemness and mitochondria transcriptional programs. ....                                                                                                         | 71  |
| Figure S10. Pharmacokinetic, pharmacodynamic and tolerability properties of BRD0705.....                                                                                                                              | 72  |
| Supplementary Tables:.....                                                                                                                                                                                            | 73  |
| Table S5. Kinome selectivity for BRD0320 and BRD5648 (Carna biosciences, JP).....                                                                                                                                     | 73  |
| Table S6. Kinome selectivity for BRD0705 and BRD3731 (Carna biosciences, JP).....                                                                                                                                     | 80  |
| Table S7. Lists of genes differentially expressed based on an absolute fold change of RPKM expression $\geq 1.5$ , a P-value $\leq 0.05$ , and a FDR $\leq 0.05$ between control and BRD0705-treated U937 cells. .... | 87  |
| Table S8. Lists of genes differentially expressed based on an absolute fold change of RPKM expression $\geq 1.5$ , a P-value $\leq 0.05$ , and a FDR $\leq 0.05$ between control and BRD3731-treated U937 cells. .... | 96  |
| Table S9. Lists of genes differentially expressed based on an absolute fold change of RPKM expression $\geq 1.5$ , a P-value $\leq 0.05$ , and a FDR $\leq 0.05$ between control and BRD0320-treated U937 cells. .... | 107 |
| Table S10. Top enriched gene sets from the functional groups predicted in BRD0705 vs DMSO enrichment map. Significance of the enrichment based on Fisher exact test. ....                                             | 150 |
| Table S11. Cytogenetics, molecular and clinical characteristics of patient samples used in this study.....                                                                                                            | 151 |



## **Experimental conditions and parameters for X-ray co-crystal structures of hGSK3 $\beta$ with BRD0209, BRD3731 and BRD0705 (Xtal Biostructures)**

X-ray co-crystals were obtained at Xtal BioStructures, Natick, MA.

*Co-crystal structure determination:* Recombinant human GSK3 $\beta$  was generated as previously reported [Wagner, 2016]. GSK3 $\beta$  was co-crystallized with 5 molar excess compound using the sitting drop and vapor diffusion at 24 °C. The reservoir solution contained 0.15 M DL-malic acid pH 7.0, 20% (w/v) PEG 3350; 0.1 M Bis-Tris pH 6.5, 25% (w/v) PEG 3350; and 0.2 M Sodium acetate pH 7.0, 20% (w/v) PEG 3350 for co-crystallization with BRD0209, BRD0705, and BRD3731, respectively. The X-ray diffraction data were measured at beamline X29A, NSLS, Brookhaven National Laboratory for the complex with BRD0209, and Beamline 08ID-1, Canadian Light Source for complexes with BRD0705 and BRD3731. The X-ray diffraction data were processed using HKL2000 and SCALEPACK [Otwinowski and Minor, 1997], as summarized in Table S1. The crystal structures were solved by molecular replacement with PHASER using in house structure of GSK3 $\beta$  as starting models. The models were rebuilt using COOT [Emsley et al. 2010] and refined using REFMAC5 [Vagin 2004]. The electron density corresponding to the compounds is illustrated in Figure S3. The statistics of the refined structures are summarized in Table S2.

**Table S1. X-ray data reduction statistics for X-ray co-crystal structures of hGSK3 $\beta$  with BRD0209, BRD3731 and BRD0705.**

|                               | GSK3B-BRD0209                                                                                                                    | GSK3B-BRD0705                                                                          | GSK3B-BRD3731                                                                                                                    |
|-------------------------------|----------------------------------------------------------------------------------------------------------------------------------|----------------------------------------------------------------------------------------|----------------------------------------------------------------------------------------------------------------------------------|
| Space group                   | <i>P1</i>                                                                                                                        | <i>C2</i>                                                                              | <i>P1</i>                                                                                                                        |
| Wavelength                    | 1.075 Å                                                                                                                          | 0.9795 Å                                                                               | 0.9795 Å                                                                                                                         |
| Unit cell                     | $a = 64.37 \text{ Å}, b = 67.71 \text{ Å}, c = 67.56 \text{ Å}, \alpha = 79.56^\circ, \beta = 88.18^\circ, \gamma = 76.50^\circ$ | $a = 104.63 \text{ Å}, b = 85.43 \text{ Å}, c = 112.07 \text{ Å}, \beta = 95.08^\circ$ | $a = 63.98 \text{ Å}, b = 67.49 \text{ Å}, c = 67.63 \text{ Å}, \alpha = 79.14^\circ, \beta = 76.72^\circ, \gamma = 88.90^\circ$ |
| Resolution range (Å)          | 50-2.4 (2.5 – 2.4)                                                                                                               | 50-2.4 (2.7 – 2.6)                                                                     | 37-2.7 (2.8 – 2.7)                                                                                                               |
| Number of measurements        | 510,924                                                                                                                          | 114,626                                                                                | 58,302                                                                                                                           |
| Number of unique reflections  | 41,861                                                                                                                           | 30,464                                                                                 | 29,474                                                                                                                           |
| $R_{\text{sym}}(\%)^a$        | 7.1 (51)                                                                                                                         | 8.3 (60)                                                                               | 5.8 (45)                                                                                                                         |
| Completeness (%) <sup>a</sup> | 98 (94)                                                                                                                          | 100 (100)                                                                              | 99 (98)                                                                                                                          |
| $I/\sigma^a$                  | 17.4 (2.1)                                                                                                                       | 14.9 (2.7)                                                                             | 13.7 (2.0)                                                                                                                       |

<sup>a</sup> Numbers in the parentheses are for the highest resolution shell.

**Table S2. Crystallographic refinement statistics for X-ray co-crystal structures of hGSK3 $\beta$  with BRD0209, BRD3731 and BRD0705.**

|                                             | GSK3B-BRD0209 | GSK3B-BRD0705 | GSK3B-BRD3731 |
|---------------------------------------------|---------------|---------------|---------------|
| Resolution range (Å)                        | 50-2.4        | 50-2.6        | 50-2.7        |
| $R_{\text{cryst}}(\%)$                      | 16.7          | 17.8          | 17.5          |
| $R_{\text{free}}(\%)$                       | 22.4          | 24.4          | 24.0          |
| Molecules per asymmetric unit               | 2             | 2             | 2             |
| Number of waters                            | 240           | 97            | 63            |
| Rmsd bond lengths (Å) <sup>a</sup>          | 0.015         | 0.013         | 0.014         |
| Rmsd bond angles (°) <sup>a</sup>           | 1.90          | 1.72          | 1.76          |
| Average <i>B</i> -factors (Å <sup>2</sup> ) |               |               |               |
| Main chain atoms                            | 53.9, 53.2    | 71.1, 65.9    | 61.4, 63.2    |
| Side chain atoms                            | 59.2, 59.4    | 76.8, 71.7    | 66.3, 68.7    |
| Ligands                                     | 39.0, 37.1    | 59.1, 56.6    | 47.0, 54.6    |
| Waters                                      | 53.4          | 59.4          | 53.9          |
| Ramachandran Plot (%)                       |               |               |               |
| Favored                                     | 99.7          | 99.0          | 99.5          |
| Generously allowed                          | 0.0           | 0.7           | 0.2           |
| Disallowed                                  | 0.3           | 0.3           | 0.3           |
| RCSB entry                                  | 5KPK.pdb      | 5KPL.pdb      | 5KPM.pdb      |

<sup>a</sup> Root-mean square deviation (rmsd) from the target stereochemistry (Engh and Huber, 1991).

Electron density map (SigmaA-weighted  $2mF_o-DF_c$ , contoured at  $1\sigma$ ) corresponding to the compound BRD0209(a), BRD0705(b) and BRD3731(c) bound to 2 GSK3 $\beta$  in the asymmetric unit.

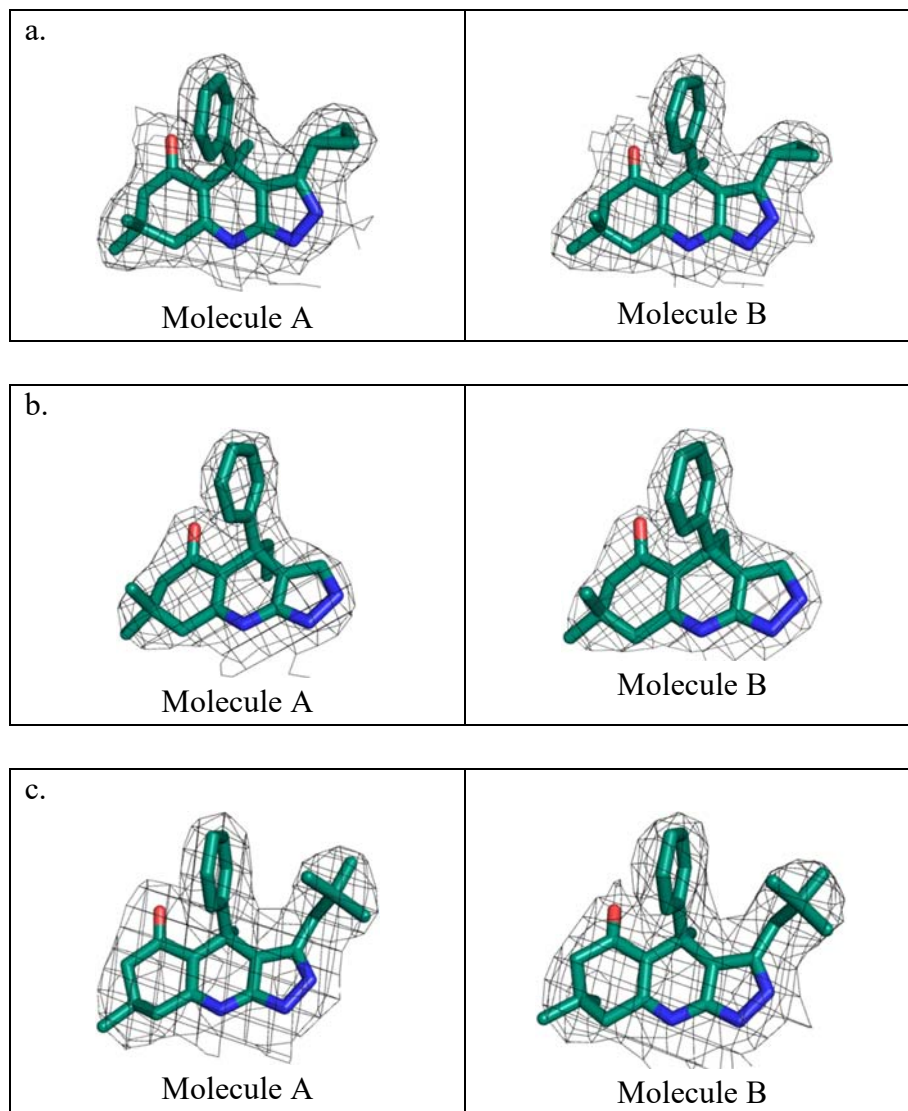

References:

Wagner FF., Bishop JA., ..., Holson EB., Pan JQ. (2016) "Inhibitors of Glycogen Synthase Kinase 3 with Exquisite Kinome-Wide Selectivity and Their Functional Effects" *ACS Chem. Bio.* 11 (7), 1952–1963.

Emsley P, Lohkamp B, Scott WG and Cowtan K (2010) "Features and Development of COOT" *Acta Cryst. D*66:486-501.

Engh RA and Huber R (1991) "Accurate bond and angle parameters for X-ray protein structure refinement" *Acta Cryst. A*47:392-400

Otwinowski Z and Minor W (1997) "Processing of X-ray Diffraction Data Collected in Oscillation Mode" *Meth. Enzymol.* **276**:307-326.

Vagin, A.A., Steiner, R..S., Lebedev, A.A., Potterton, L., McNicholas, S., Long, F. and Murshudov, G.N. (2004) "REFMAC5 dictionary: organization of prior chemical knowledge and guidelines for its use" *Acta Cryst. D* **60**: 2284-2295.

## Experimental conditions and parameters for X-ray co-crystal structures of GSK3 $\beta$ (D133E) with BRD0705

X-ray co-crystals were obtained at Cayman Chemical, Ann Arbor, MI.

*Expression and Purification of Mutant GSK-3 $\beta$ .* Mutant D133E GSK-3 $\beta$  (1-420) with an N-terminal GST-tag and a thrombin cleavage site was heterologously expressed in insect Sf9 cells using the Bac-to-Bac Baculovirus System (Life Technologies). Mutant D133E GSK-3 $\beta$  was purified using GST chromatography, anion exchange, and size exclusion chromatography. To generate material for crystallographic studies, thrombin was added to mutant GSK-3 $\beta$ , quenched with PMSF and flowed over GST resin to remove the free GST. The cleaved material was further purified by applying it to a FastFlow SP column (GE Healthcare) equilibrated with 50 mM HEPES pH 7.0, 40 mM NaCl, and 20% glycerol. Protein was eluted with a linear gradient from 0-500 mM NaCl in 20 column volumes and then dialyzed against 50 mM HEPES pH 7.0, 150 mM NaCl, and 1 mM DTT at 4°C overnight and then concentrated to 6.5 mg/mL for crystallization. Mutant D133E GSK-3 $\beta$  was confirmed by mass spectrometry.

*Crystallization.* To generate crystals of BRD0705/mutant GSK-3 $\beta$ , 2.5 mM BRD0705 was added to concentrated protein and incubated on ice for 1 hour. Mutant complex crystallization was then carried out using sitting drop vapor diffusion. The mutant complex formed diamond-shaped crystals over a reservoir containing 20% PEG MME 5,000 and 0.1 M Bis-Tris, pH 6.5. Crystals were harvested, cryo-protected in the mother liquor supplemented with 20% glycerol and then flash frozen in liquid nitrogen for data collection.

*Data collection and structure determination.* Mutant complex structure was solved by molecular replacement using x-ray diffraction data collected at beamline LS-CAT of the Advanced Photon Source, Lemont, IL. Diffraction images were scaled and processed with HKL2000 (Otwinowski and Minor, 1997). Statistics are summarized in Table 1. The crystallographic space group was C2 with unit cell dimensions of  $a=107.96 \text{ \AA}$ ,  $b=84.22 \text{ \AA}$ ,  $c=117.22 \text{ \AA}$  and  $\alpha=\gamma=90^\circ$ ,  $\beta=94.7^\circ$ . To solve the structure, wild-type GSK-3 $\beta$  (PDB ID: 4PTE) with the D133 side chain deleted was used as the starting model in PHASER (McCoy, 2007). The asymmetric unit contained 2 molecules of mutated GSK-3 $\beta$ /BRD0705. Multiple rounds of building and refinement in the absence of both the mutated side chain and BRD0705 were performed using REFMAC (Vagin, 2004) and COOT (Emsley, 2004). In the later rounds, both the D133E side chain and BRD0705 were added and refined. The final model contained residues 35-381 (molecule A) and 36-382 (molecule B) and 2 molecules of BRD0705. Refinement statistics are summarized in Table 2.

### References:

Otwinowski, Z. and Minor, W. Processing of X-ray diffraction data collected in oscillation mode (1997). *Methods Enzymol.* 276: 307-326. (HKL2000)  
McCoy, A.J., Grosse-Kunstleve, R..W., Adams, P.D., Winn, M.D., Storoni, L.C. and Read, R.J. Phaser crystallographic software. (2007) Copyright © International Union of Crystallography.

Vagin, A.A., Steiner, R..S., Lebedev, A.A., Potterton, L., McNicholas, S., Long, F. and Murshudov, G.N. REFMAC5 dictionary: organization of prior chemical knowledge and guidelines for its use (2004). *Acta Cryst. D* 60: 2284-2295.

Emsley, P. and Cowtan, K. *COOT*: model-building tools for molecular graphics (2004). *Acta Crystallogr. D* 60: 2126-2132.

**Table S3. Final diffraction statistics for the mutant hGSK3B (D133E)/BRD0705 complex crystal used in structure determination.**

|                                                                         | mutGSK3 $\beta$ /BRD0705 |
|-------------------------------------------------------------------------|--------------------------|
| <b>Data collection</b>                                                  |                          |
| <b>Space group</b>                                                      | C2                       |
| <b>Cell dimensions</b>                                                  |                          |
| <b><i>a</i>, <i>b</i>, <i>c</i> (Å)</b>                                 | 107.96, 84.22, 117.22    |
| <b><math>\alpha</math>, <math>\beta</math>, <math>\gamma</math> (°)</b> | 90, 94.70, 90            |
| <b>Resolution (Å)</b>                                                   | 50.00-2.85 (2.95-2.85)   |
| <b><i>R</i><sub>sym</sub> or <i>R</i><sub>merge</sub></b>               | 0.089 (0.66)             |
| <b><i>I</i>/<math>\sigma</math></b>                                     | 13.3 (1.8)               |
| <b>Completeness (%)</b>                                                 | 99.6 (100.0)             |
| <b>Redundancy</b>                                                       | 3.8 (3.8)                |
| <b>Mosaicity (°)</b>                                                    | 0.66                     |
| <b>Molecules in A.U.</b>                                                | 2                        |

\*Parenthesis denotes the highest resolution shell.

**Table S4. Final refinement statistics for the mutant hGSK3B (D133E)/BRD0705 complex structure.**

|                                          | mutGSK3 $\beta$ /BRD0705 |
|------------------------------------------|--------------------------|
| <b>Data Refinement</b>                   |                          |
| <b>Resolution Range (Å)</b>              | 47-2.85                  |
| <b><i>R</i><sub>work</sub> (%)</b>       | 0.192                    |
| <b><i>R</i><sub>free</sub> (%)</b>       | 0.258                    |
| <b>Number of Molecules</b>               |                          |
| <b>BRD0705</b>                           | 2                        |
| <b>Bond Lengths (Å)</b>                  | 0.012                    |
| <b>Bond angles (°)</b>                   | 1.72                     |
| <b>Average B-factors (Å<sup>2</sup>)</b> |                          |
| <b>Main chain atoms</b>                  | 58.9                     |
| <b>Side chain atoms</b>                  | 61.0                     |
| <b>BRD0705</b>                           | 71.0                     |
| <b>Ramachandran Plot (%)</b>             |                          |
| <b>Favored Residues</b>                  | 93.1                     |
| <b>Allowed Residues</b>                  | 6.3                      |
| <b>Outlier Residues</b>                  | 0.6                      |

## Experimental conditions for molecular dynamics simulations

Molecular dynamics simulations of apo-GSK3A and apo-GSK3B systems were run to help rationalize any structural differences between the two paralogs. Since competitive inhibitors were being developed in this work, specific attention was given to the ATP binding pocket region in the analysis. Desmond was employed to run these molecular dynamics simulations (Desmond Molecular Dynamics System, version 3.8, D. E. Shaw Research, New York, NY, 2014. Maestro-Desmond Interoperability Tools, version 3.8, Schrödinger, New York, NY, 2014 and Bowers, 2006). Two sets of simulations were run, each set included 7 separate 100ns unrestrained molecular dynamics simulations starting from a random velocity seed to investigate the reproducibility of any findings. The two sets of systems simulated were the apo-GSK3A and apo-GSK3B kinases. The apo-GSK3B system was built from our recently solved GSK3B-0209 crystal structure. For the apo-GSK3B system preparation, all crystallographic waters, ions and ligands were removed from the crystallographic structure were removed in the Protein Preparation Wizard of Maestro. The phosphorylated state of Tyr216 in GSK3B in the activation loop was maintained. The protein was run through Protein Preparation Wizard in Maestro, version 9.8 (Schrödinger, LLC, New York, NY, 2014) using the default settings as well as building in any missing sidechains (Sastry, 2013). The system was neutralized with counterions and put in an orthorhombic water box with buffer boundary conditions of (10.0Å, 10.0 Å, 10.0 Å). The system was solvated with TIP3P and had a salt concentration of 0.15M with Na<sup>+</sup> and Cl<sup>-</sup> ions. The OPLS2.1 force field was used for this system (Shivakumar, 2010). The default settings were selected for the minimization and equilibration protocol. Random velocity seeds were selected to begin each production run. Following the minimization and equilibration protocol was a production run of 100ns of unrestrained molecular dynamics. All production runs were simulated at 300K.

Since there are no publicly available structures of GSK3A, an homology model was needed to be built for the apo-GSK3A system. Prime, version 3.6, (Schrödinger, LLC, New York, NY, 2014) was employed to model the apo-GSK3A system (Jacobson, 2002 and 2004). The recently solved GSK3B-0209 X-ray crystallographic structure was used as the template structure due to its high homology (see main text for further details). The human GSK3A sequence used was from UniProt ID P49840. The phosphorylated state of Tyr279 in GSK3A of the activation loop was maintained. All other parameters were the same as the apo-GSK3B system protocol described above for the system set up and simulation.

**Cluster analysis:** representative structure in figure 1c

Schrödinger's trajectory\_cluster.py python script was employed to cluster all trajectories from each system individually. To obtain an accurate view of the dominate backend conformations the three backend residues described in supplemental figure S3 and S4 were selected for the clustering calculation: GSK3A (Glu196, Arg176, and Glu143) and GSK3B (Asp133, Arg113, Glu80). Only the sidechain heavy atoms of these three residues were selected for the calculation. The



representative structures from run 4 of apo-GSK3A and run 5 of apo-GSK3B are shown in figure 1C panel 1 and 2 respectively.

#### References:

Kevin J. Bowers, Edmond Chow, Huafeng Xu, Ron O. Dror, Michael P. Eastwood, Brent A. Gregersen, John L. Klepeis, Istvan Kolossvary, Mark A. Moraes, Federico D. Sacerdoti, John K. Salmon, Yibing Shan, and David E. Shaw, "Scalable Algorithms for Molecular Dynamics Simulations on Commodity Clusters," Proceedings of the ACM/IEEE Conference on Supercomputing (SC06), Tampa, Florida, 2006, November 11-17.

Sastry, G.M.; Adzhigirey, M.; Day, T.; Annabhimoju, R.; Sherman, W., "Protein and ligand preparation: Parameters, protocols, and influence on virtual screening enrichments," *J. Comput. Aid. Mol. Des.*, 2013, 27(3), 221-234.

Shivakumar, D.; Williams, J.; Wu, Y.; Damm, W.; Shelley, J.; Sherman, W., "Prediction of Absolute Solvation Free Energies using Molecular Dynamics Free Energy Perturbation and the OPLS Force Field," *J. Chem. Theory Comput.*, 2010, 6, 1509–1519.

Jacobson, M. P.; Pincus, D. L.; Rapp, C. S.; Day, T. J. F.; Honig, B.; Shaw, D. E.; Friesner, R. A., "A Hierarchical Approach to All-Atom Protein Loop Prediction," *Proteins: Structure, Function and Bioinformatics*, 2004, 55, 351-367.

Jacobson, M. P.; Friesner, R.A.; Xiang, Z.; Honig, B., "On the Role of Crystal Packing Forces in Determining Protein Sidechain Conformations," *J. Mol. Biol.*, 2002, 320, 597-608.

## Synthesis and Characterization of Compounds

All final compounds were confirmed to be of >95% purity based on HPLC LC-MS analysis (Alliance 2795, Waters, Milford, MA) unless otherwise noted. Purity was measured by UV absorbance at 210 nm. Identity was determined on a SQ mass spectrometer by positive and negative electrospray ionization. Mobile phase A consisted of 0.01% formic acid in water, while mobile phase B consisted of 0.01% formic acid in acetonitrile. The gradient ran from 5% to 95% mobile phase B over 1.75 minutes at 1.75 mL/min. An Agilent Poroshell 120 ECC18, 2.7  $\mu\text{m}$ , 3.0x30 mm column was used with column temperature maintained at 40  $^{\circ}\text{C}$ . 2.1  $\mu\text{L}$  of sample solution were injected. All reagents and solvents were purchased from commercial vendors and used as received.  $^1\text{H}$  and  $^{13}\text{C}$  NMR spectra were recorded on a Bruker 300 MHz, Bruker 400 MHz, or Varian UNITY INOVA 500 MHz spectrometer as indicated. Proton and carbon chemical shifts ( $\delta$ ) are reported in ppm relative to  $\text{CDCl}_3$  ( $^1\text{H}$   $\delta$  7.26,  $^{13}\text{C}$   $\delta$  77.16),  $\text{CD}_3\text{OD}$  ( $^1\text{H}$   $\delta$  3.31,  $^{13}\text{C}$   $\delta$  49.00) and  $d_6$ -DMSO ( $^1\text{H}$   $\delta$  2.50,  $^{13}\text{C}$   $\delta$  39.52). NMR data are reported as follows:  $\delta$ , multiplicity (br = broad, s = singlet, d = doublet, t = triplet, m = multiplet); coupling constants in Hz; integration. NMR data were collected at 25  $^{\circ}\text{C}$ . Flash chromatography was performed using 40-60  $\mu\text{m}$  Silica Gel (60  $\text{\AA}$  mesh) on a Teledyne Isco Combiflash Rf system.

### General Procedure for the Synthesis of Pyrazolodihydroquinolinones

#### Step 1: Example procedure for SEAr of Aminopyrazoles with Ketones

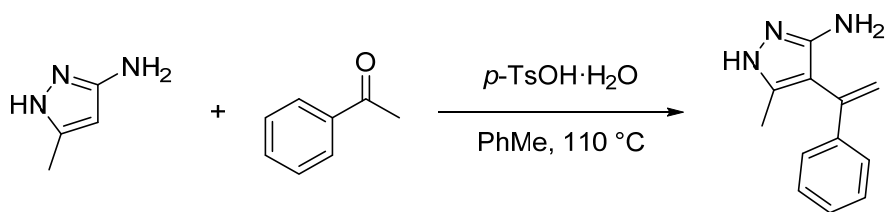

#### 5-methyl-4-(1-phenylvinyl)-1H-pyrazol-3-amine.

To a solution of 5-methyl-1H-pyrazol-2-amine (500 mg, 5.15 mmol, 1.0 eq) in toluene (20 mL) were added acetophenone (619 mg, 5.15 mmol, 1.0 eq) and  $p$ -toluenesulfonic acid monohydrate (98 mg, 0.52 mmol, 0.1 eq). The reaction mixture was heated at reflux for 16 h, and the solvent was evaporated. The residue was purified by flash column chromatography ( $\text{SiO}_2$ , 4%

MeOH/CH<sub>2</sub>Cl<sub>2</sub>) to provide the styrenyl pyrazole (350 mg, 34%) as a white solid: MS (ESI) [M+H]<sup>+</sup> calcd for C<sub>12</sub>H<sub>14</sub>N<sub>3</sub> 200.1, found 200.1.

## Step 2: Example procedure for Condensation/Cyclization with Dimedone

### Method A

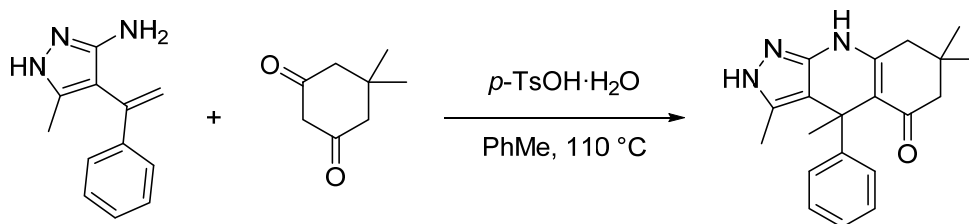

### (S)-3,4,7,7-tetramethyl-4-phenyl-2,4,6,7,8,9-hexahydro-5H-pyrazolo[3,4-b]quinolin-5-one (3).

To a solution of the above styrenyl pyrazole (200 mg, 1.00 mmol, 1.0 eq) in toluene (1 mL) were added dimedone (141 mg, 1.00 mmol, 1.0 eq) and *p*-toluenesulfonic acid monohydrate (95 mg, 0.50 mmol, 0.5 eq). The reaction mixture was heated at 110 °C for 24 h, then cooled to room temperature. Water and saturated aqueous NaHCO<sub>3</sub> were added, and the layers were separated. The aqueous layer was extracted with CH<sub>2</sub>Cl<sub>2</sub>, and the combined organics were dried over Na<sub>2</sub>SO<sub>4</sub>, filtered, and evaporated. The residue was purified by flash column chromatography (SiO<sub>2</sub>, 4% MeOH/CH<sub>2</sub>Cl<sub>2</sub>) to provide the tricyclic compound **rac-3** (150 mg, 47%) as a white solid.

Chiral separation: Chiralpak IC, 90:10 A/B (A = 0.1% DEA/*n*-hexane, B = 1:1 CH<sub>2</sub>Cl<sub>2</sub>/MeOH)).

Characterization of **rac-3**:

<sup>1</sup>H NMR (400 MHz, DMSO-d<sub>6</sub>) δ 11.58 (s, 1H), 9.57 (s, 1H), 7.26 (d, *J* = 7.2 Hz, 2H), 7.15 (t, *J* = 7.6 Hz, 2H), 6.99 (t, *J* = 7.2 Hz, 1H), 2.40 (s, 2H), 1.99 (d, *J* = 16.0 Hz, 1H), 1.87 (d, *J* = 16.0 Hz, 1H), 1.83 (s, 3H), 1.60 (s, 3H), 0.99 (s, 3H), 0.95 (s, 3H).

HRMS calcd for C<sub>20</sub>H<sub>24</sub>N<sub>3</sub>O 321.1841, found 321.1849. [M+H]<sup>+</sup> observed.

HPLC purity 97%, >99.9% *er*.

[α]<sub>D</sub><sup>20</sup> (c = 0.25, MeOH) -180.9°.

### Method B

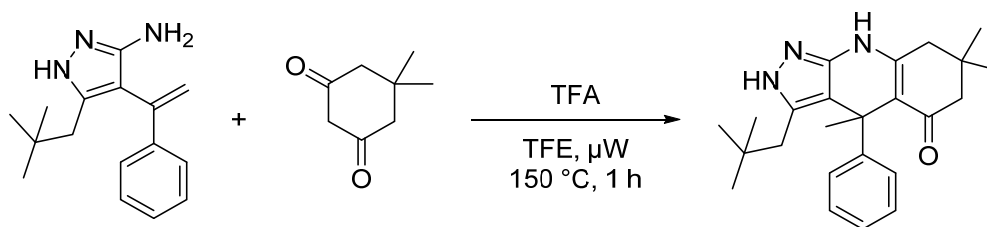

### (S)-4,7,7-trimethyl-3-neopentyl-4-phenyl-2,4,6,7,8,9-hexahydro-5H-pyrazolo[3,4-b]quinolin-5-one (BRD3731).

A solution of 5-neopentyl-4-(1-phenylvinyl)-1H-pyrazol-3-amine (1.14 g, 4.44 mmol, 1.0 eq), 5,5-dimethylcyclohexane-1,3-dione (623 mg, 4.44 mmol, 1.0 eq), and trifluoroacetic acid (340  $\mu\text{l}$ , 4.44 mmol, 1.0 eq) in trifluoroethanol (17 mL) in a sealed microwave tube was heated at 150 °C for 1 h. The resulting dark yellow solution was evaporated, re-dissolved in  $\text{CH}_2\text{Cl}_2$ , and washed with saturated aqueous  $\text{NaHCO}_3$ . The aqueous layer was extracted with  $\text{CH}_2\text{Cl}_2$ , and the combined organics were dried over  $\text{MgSO}_4$ , filtered, and evaporated. The residue was purified by flash column chromatography (0-65% EtOAc/hexanes) to provide the cyclized compound *rac*-BRD3731 (1.595 g, 4.22 mmol, 95% yield) as a tan solid.

Chiral separation: Chiralpak-IA 80:20 A:B (A = 0.1% DEA in *n*-hexane, B = 1:1  $\text{CH}_2\text{Cl}_2/\text{MeOH}$ ).

#### Characterization of BRD3731:

$^1\text{H}$  NMR (300 MHz,  $\text{DMSO-d}_6$ )  $\delta$  11.35 (s, 1H), 9.62 (s, 1H), 7.28 (d,  $J = 7.1$  Hz, 2H), 7.14 (t,  $J = 7.7$  Hz, 2H), 6.97 (t,  $J = 7.3$  Hz, 1H), 2.46 - 2.33 (m, 2H), 2.17 - 1.86 (m, 4H), 1.86 (d,  $J = 2.3$  Hz, 3H), 0.98 (s, 3H), 0.94 (s, 3H), 0.52 (s, 9H).

HRMS calcd for  $\text{C}_{24}\text{H}_{31}\text{N}_3\text{O}$  377.2467 found 377.2468.  $[\text{M}-\text{H}]^-$  observed.

HPLC purity 99.5%, 99.7% *er*.

$[\alpha]_D^{20}$  ( $c = 0.125$ , MeOH)  $-146.5^\circ$ .

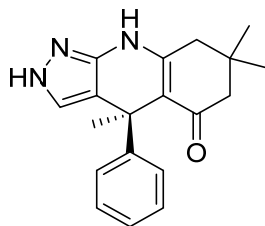

**(S)-4,7,7-Trimethyl-4-phenyl-2,4,6,7,8,9-hexahydro-5H-pyrazolo[3,4-*b*]quinolin-5-one (1).**

Step 1: yield 31%.

Step 2: Method A, yield 60%.

Chiral separation: Chiralpak-IC 85:15 A:B (A = 0.1% DEA in *n*-hexane, B = 1:1 CH<sub>2</sub>Cl<sub>2</sub>/MeOH).

<sup>1</sup>HNMR (500 MHz, DMSO-*d*<sub>6</sub>) δ 11.90 (s, 1H), 9.67 (s, 1H), 7.28 (d, *J* = 7.5 Hz, 2H), 7.16 (t, *J* = 8.0 Hz, 2H), 7.09 (s, 1H), 6.99 (t, *J* = 7.0 Hz, 1H), 2.44 (s, 2H), 2.05 (d, *J* = 6.0 Hz, 1H), 1.97 (s, 1H), 1.92 (s, 3H), 1.01 (s, 3H), 1.00 (s, 3H).

HRMS calcd for C<sub>19</sub>H<sub>21</sub>N<sub>3</sub>O 307.1685, found 307.1688. [M+H]<sup>+</sup> observed.

HPLC purity 99.8%, >99.9% *er*.

[α]<sub>D</sub><sup>20</sup> (*c* = 0.25, MeOH) -93.8°.

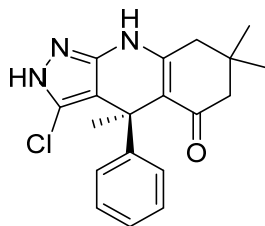

**(R)-3-Chloro-4,7,7-trimethyl-4-phenyl-2,4,6,7,8,9-hexahydro-5H-pyrazolo[3,4-*b*]quinolin-5-one (2).**

Step 1: yield 19%.

Step 2: Method A, yield 45%.

Chiral separation: Chiralpak-IC 80:20 A:B (A = 0.1% DEA in *n*-hexane, B = 1:1 CH<sub>2</sub>Cl<sub>2</sub>/MeOH).

<sup>1</sup>H NMR (300 MHz, CD<sub>3</sub>OD): δ 7.45-7.35 (d, *J* = 8.1 Hz, 2H), 7.25-7.15(m, 2H), 7.12-7.05 (t, *J* = 6.9 Hz, 1H), 2.41-2.35 (m, 2H), 2.20-2.05 (m, 2H), 2.02-1.97 (s, 3H), 1.05-0.99 (m, 6H).

HRMS calcd for C<sub>19</sub>H<sub>20</sub>ClN<sub>3</sub>O 341.1295, found 341.1300. [M+H]<sup>+</sup> observed.

HPLC purity 99.9%, 99.5% *er*.

[α]<sub>D</sub><sup>20</sup> (*c* = 0.125, MeOH) -211.2°.

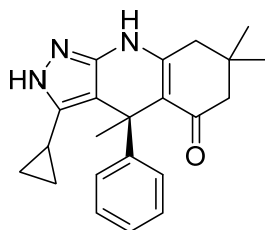

**BRD0209**

**(S)-3-Cyclopropyl-4,7,7-trimethyl-4-phenyl-2,4,6,7,8,9-hexahydro-5H-pyrazolo[3,4-*b*]quinolin-5-one (BRD0209).**

Step 1: yield 44%.

Step 2: Method A, yield 65%.

Chiral separation: Chiralpak-IC 90:10 A:B (A = 0.1% DEA in *n*-hexane, B = 1:1 CH<sub>2</sub>Cl<sub>2</sub>/MeOH).

<sup>1</sup>H NMR (400 MHz, DMSO-*d*<sub>6</sub>) δ 11.41 (s, 1H), 9.59 (s, 1H), 7.29 (d, *J* = 7.3 Hz, 2H), 7.15 (t, *J* = 7.7 Hz, 2H), 6.99 (t, *J* = 7.2 Hz, 1H), 2.40 (dd, *J* = 19.9, 16.5 Hz, 2H), 2.00 (d, *J* = 15.8 Hz, 1H), 1.94 (s, 3H), 1.87 (d, *J* = 15.8 Hz, 1H), 1.14 (tt, *J* = 8.4, 5.4 Hz, 1H), 0.99 (s, 3H), 0.95 (s, 3H), 0.72 (dtd, *J* = 12.8, 8.7, 7.6, 4.1 Hz, 1H), 0.45 (dq, *J* = 9.7, 5.5 Hz, 1H), 0.40 – 0.24 (m, 2H).

HRMS calcd for C<sub>22</sub>H<sub>26</sub>N<sub>3</sub>O 347.1998, found 347.2001. [M+H]<sup>+</sup> observed.

HPLC purity 99.4%, >99.9% *er*.

[α]<sub>D</sub><sup>20</sup> (*c* = 0.25, MeOH) -176.7°.

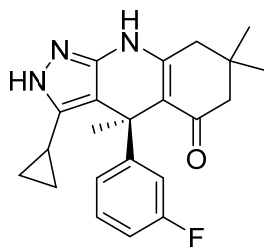

**(S)-3-Cyclopropyl-4-(3-fluorophenyl)-4,7,7-trimethyl-2,4,6,7,8,9-hexahydro-5H-pyrazolo[3,4-b]quinolin-5-one (BRD0320).**

Step 1: yield 35%.

Step 2: Method B, yield 61%.

Chiral separation: Chiralpak-ADH 85:15 A:B (A = 0.1% DEA in *n*-hexane, B = EtOH).

$^1\text{H}$  NMR (400 MHz, DMSO- $d_6$ ):  $\delta$  11.48 (s, 1H), 9.67 (s, 1H), 7.23-7.13 (m, 1H), 7.10 (d,  $J$  = 7.9 Hz, 1H), 7.03 (dt,  $J$  = 11.2, 2.1 Hz, 1H), 6.85-6.79 (m, 1H), 2.41 (s, 2H), 2.04-1.98 (m, 1H), 1.91 (s, 3H), 1.90-1.88 (m, 1H), 1.20- 1.17 (m, 1H), 0.98 (s, 3H), 0.95 (s, 3H), 0.79-0.70 (m, 1H), 0.50-0.45 (m, 1H), 0.39-0.31 (m, 1H), 0.30-0.25 (m, 1H).

HRMS calcd for  $\text{C}_{22}\text{H}_{25}\text{FN}_3\text{O}$  365.1903, found 365.1907.  $[\text{M}+\text{H}]^+$  observed.

HPLC purity 99.9%, 99.3% *er*.

$[\alpha]_D^{20}$  ( $c$  = 0.125, MeOH) -275.5°.



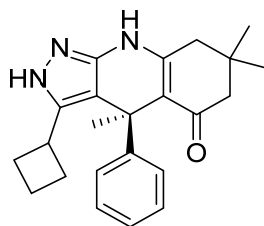

**(S)-3-Cyclobutyl-4,7,7-trimethyl-4-phenyl-2,4,6,7,8,9-hexahydro-5H-pyrazolo[3,4-*b*]quinolin-5-one (4).**

Step 1: yield 21%.

Step 2: Method A, yield 55%.

Chiral separation: Chiralpak-IC 90:10 A:B (A = 0.1% DEA in *n*-hexane, B = 1:1 CH<sub>2</sub>Cl<sub>2</sub>/MeOH).

<sup>1</sup>HNMR (400 MHz, CD<sub>3</sub>OD) δ 7.35 -7.33 (m, 2H), 7.16 (t, *J* = 7.6 Hz, 2H), 7.02 (t, *J* = 8 Hz, 1H), 3.03-2.93 (m, 1H), 2.48 (d, *J* = 4 Hz, 2H), 2.17-2.06 (m, 3H), 2.01-1.97 (m, 1H), 1.75-1.62 (m, 3H), 1.30-1.23 (m, 1H), 1.07 (s, 3H), 1.03 (s, 3H).

HRMS calcd for C<sub>23</sub>H<sub>27</sub>N<sub>3</sub>O 361.2154, found 361.2159. [M+H]<sup>+</sup> observed.

HPLC purity 99.1%, 99.7% *er*.

[α]<sub>D</sub><sup>20</sup> (*c* = 0.125, MeOH) -181.0°.

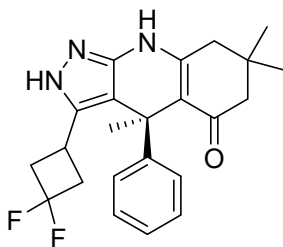

**(S)-3-(3,3-Difluorocyclobutyl)-4,7,7-trimethyl-4-phenyl-2,4,6,7,8,9-hexahydro-5H-pyrazolo[3,4-*b*]quinolin-5-one (5).**

Step 1: yield 32%.

Step 2: Method A, yield 44%.

Chiral separation: Chiralpak-IC 90:10 A:B (A = 0.1% DEA in *n*-hexane, B = 1:1 CH<sub>2</sub>Cl<sub>2</sub>/MeOH).

<sup>1</sup>H NMR (CDCl<sub>3</sub>, 300 MHz) δ 7.84 (s, 1H), 7.35 (d, *J* = 9 Hz, 2H), 7.19 (m, 2H), 7.05 (t, 1H), 2.81 (m, 2H), 2.50 (m, 1H), 2.08 (m, 5H), 1.90 (s, 3H), 1.25 (m, 2H), 1.03 (s, 3H), 0.96 (s, 3H).

HRMS calcd for C<sub>23</sub>H<sub>25</sub>F<sub>2</sub>N<sub>3</sub>O 397.1966, found 397.1970. [M+H]<sup>+</sup> observed.

HPLC purity 99.6%, 99.7% *er*.

[α]<sub>D</sub><sup>20</sup> (*c* = 0.25, MeOH) -109.7°.

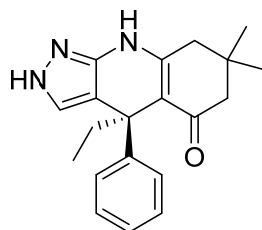

**BRD0705**

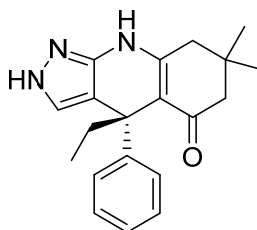

**BRD5648**

**(S)-4-Ethyl-7,7-dimethyl-4-phenyl-2,4,6,7,8,9-hexahydro-5H-pyrazolo[3,4-*b*]quinolin-5-one (BRD0705) and (R)-4-Ethyl-7,7-dimethyl-4-phenyl-2,4,6,7,8,9-hexahydro-5H-pyrazolo[3,4-*b*]quinolin-5-one (BRD5648)**

Step 1: yield 51%.

Step 2: Method B, yield 62%.

Chiral separation: Chiralpak-IC 85:15 A:B (A = 0.1% DEA in *n*-hexane, B = 1:1 CH<sub>2</sub>Cl<sub>2</sub>/MeOH).

**BRD0705:**

<sup>1</sup>HNMR (400 MHz, DMSO-*d*<sub>6</sub>) δ 11.90 (s, 1H), 9.62 (s, 1H), 7.28 (d, *J* = 7.4 Hz, 2H), 7.15 (t, *J* = 7.1 Hz, 2H), 7.05 (s, 1H), 7.00-6.97 (m, 1H), 2.92-2.88 (m, 1H), 2.43 (d, *J* = 16.3 Hz, 2H), 2.06-1.97 (m, 3H), 1.04 (s, 3H), 1.02 (s, 3H), 0.65 (t, *J* = 7.5Hz, 3H).

HRMS calcd for C<sub>20</sub>H<sub>23</sub>N<sub>3</sub>O 321.1841, found 321.1842. [M+H]<sup>+</sup> observed.

HPLC purity 98.9%, >99.9% *er*.

[α]<sub>D</sub><sup>20</sup> (*c* = 0.125, MeOH) -45.0°.

**BRD5648:**

<sup>1</sup>HNMR (400 MHz, DMSO-*d*<sub>6</sub>) δ 11.90 (s, 1H), 9.62 (s, 1H), 7.28 (d, *J* = 7.4 Hz, 2H), 7.15 (t, *J* = 7.1 Hz, 2H), 7.05 (s, 1H), 7.00-6.97 (m, 1H), 2.92-2.88 (m, 1H), 2.43 (d, *J* = 16.3 Hz, 2H), 2.06-1.97 (m, 3H), 1.04 (s, 3H), 1.02 (s, 3H), 0.65 (t, *J* = 7.5Hz, 3H).

HRMS calcd for C<sub>20</sub>H<sub>23</sub>N<sub>3</sub>O 321.1841, found 321.1842. [M+H]<sup>+</sup> observed.

HPLC purity 99.4%, 99.7% *er*.

[α]<sub>D</sub><sup>20</sup> (*c* = 0.125, MeOH) +38.3°.

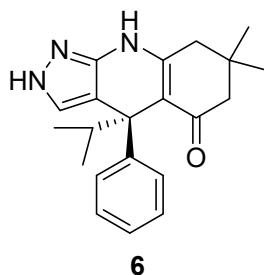

**(S)-4-Isopropyl-7,7-dimethyl-4-phenyl-2,4,6,7,8,9-hexahydro-5H-pyrazolo[3,4-b]quinolin-5-one (6).**

Step 1: 71%

Step 2: Method B, 68%

Chiral separation: Chiralpak-AD-H 85:15 A:B (A = 0.1% DEA in *n*-hexane, B = EtOH).

$^1\text{H}$ NMR (400 MHz, DMSO- $d_6$ ):  $\delta$  11.98 (s, 1H), 9.61 (s, 1H), 7.22 (d,  $J = 7.6$  Hz, 2H), 7.09 (t,  $J = 7.2$  Hz, 2H), 6.94 (t,  $J = 7.2$  Hz, 1H), 6.90 (s, 1H), 3.59 (hept,  $J = 6.8$  Hz, 1H), 2.37 (app s, 2H), 1.94, 1.83 (ABq,  $J = 16.0$  Hz, 2H), 0.98 (s, 3H), 0.93 (d,  $J = 6.8$  Hz, 3H), 0.89 (s, 3H), 0.67 (d,  $J = 6.8$  Hz, 3H).

MS calcd for  $\text{C}_{21}\text{H}_{25}\text{N}_3\text{O}$  335.1998, found 336.2070.  $[\text{M}+\text{H}]^+$  observed.

HPLC purity 98.9%, 98.6% *er*.

$[\alpha]_D^{20}$  ( $c = 0.125$ , MeOH)  $-221.8^\circ$ .

## **<sup>1</sup>HNMR and LCMS data**

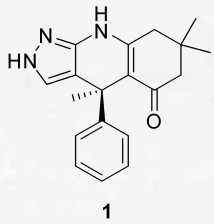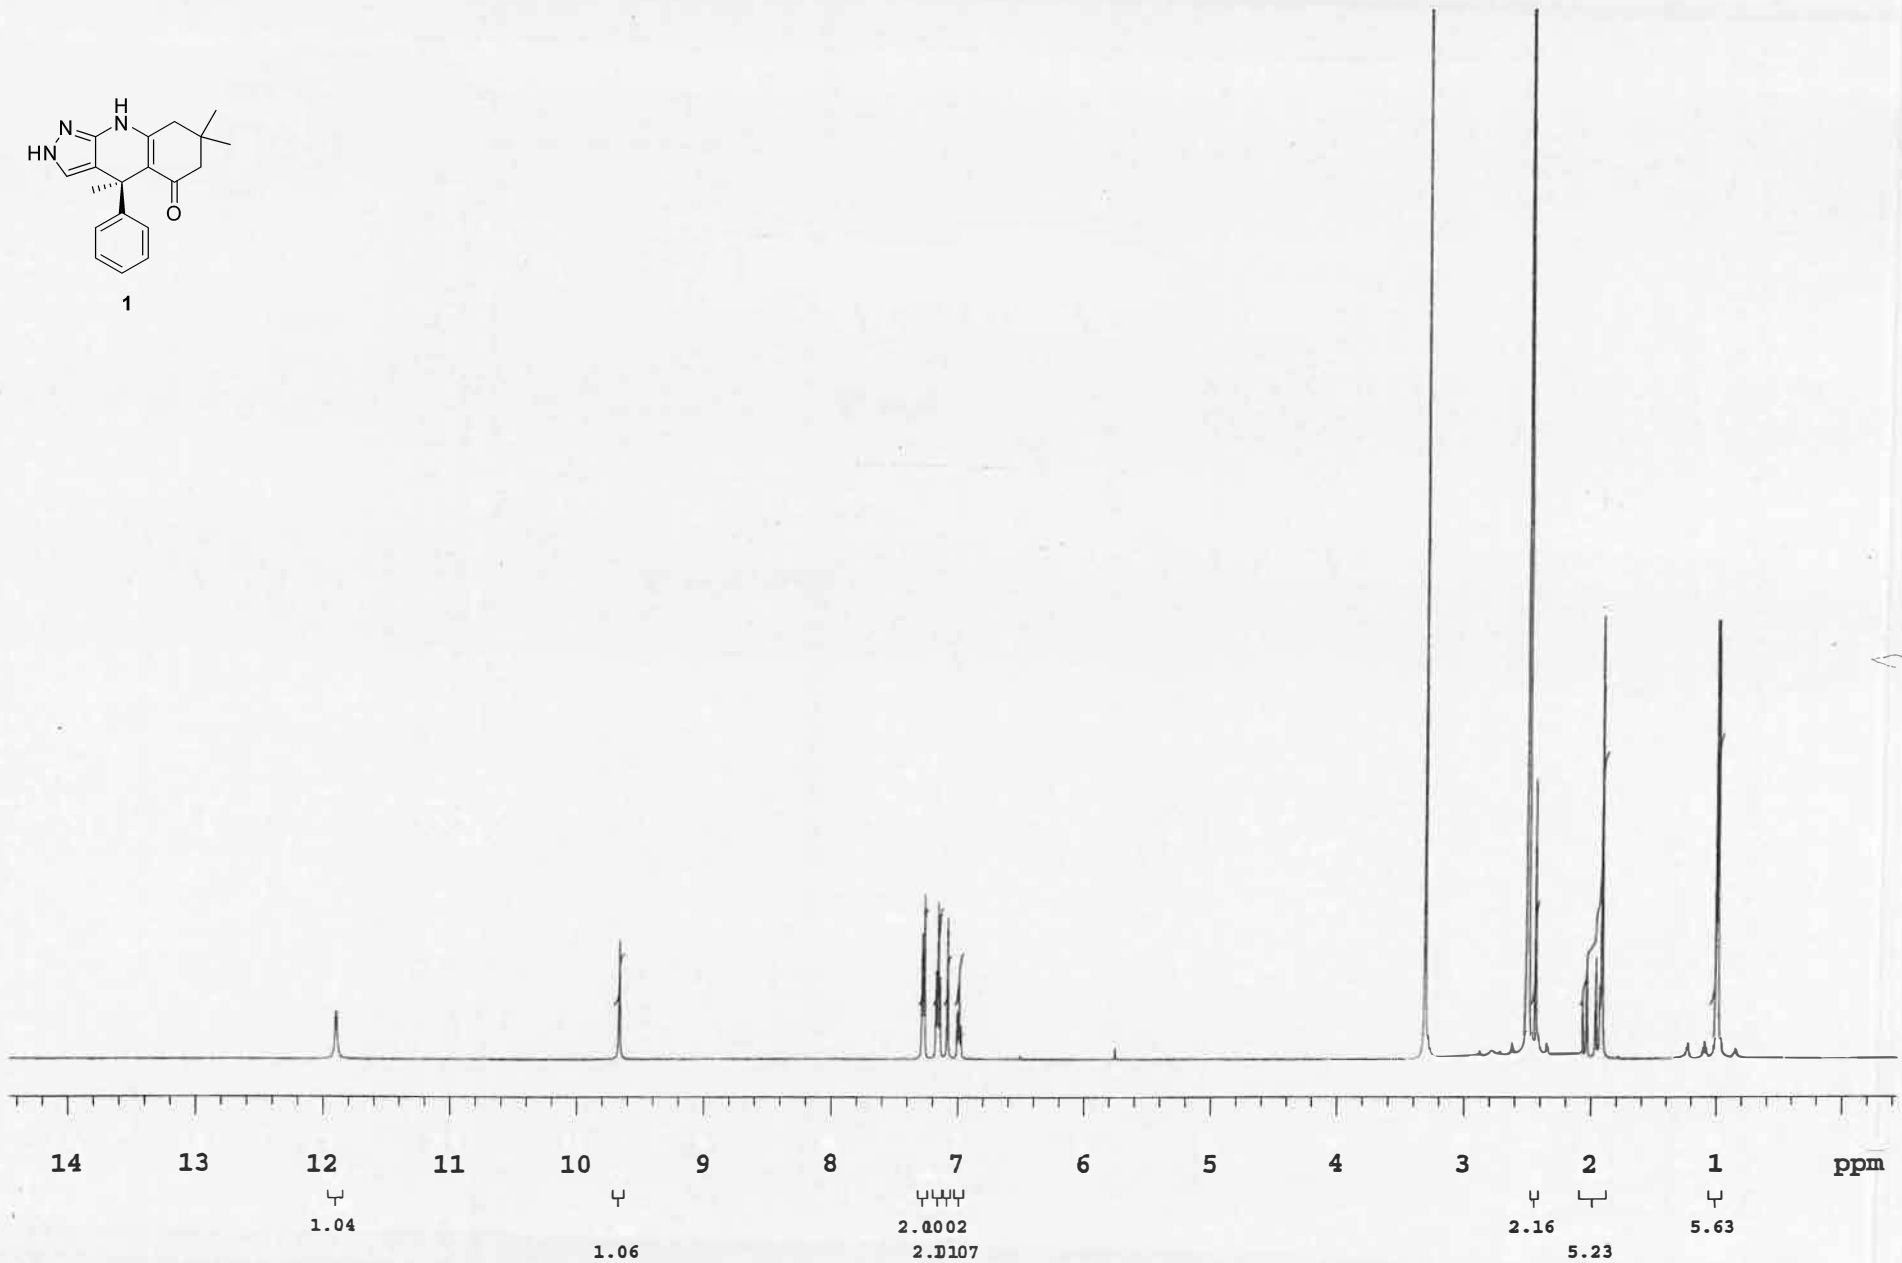

Sample Name: **SBF-MA1307-076-Fr-I # IP13090065**

Acquired By: System

Vial: 2:B,7

Acq. Method Set: PDA\_METH\_2A

Injection Volume: 0.50 ul

Proc. Chnl. Descr.: **PDA MaxPlot (190.0 nm to 800.0**

Run Time: 6.0 Minutes

Date Acquired: 9/3/2013 5:49:19 PM IST

Project Name: SAPL\_UNIT-2\_AMCL\_ALC-13\_SEP-13

Column : Acquity BEH C-18 (50 x2.1mm,1.7 $\mu$ ,)

Column Temp : 25°C

Mobile Phase A : Acetonitrile

Mobile Phase B : 0.025% TFA (Aq)

Flow Rate : 0.50 mL/Min

Time/% B : 0/90,0.5/90,3/10,6/10

Diluent : ACN:Water

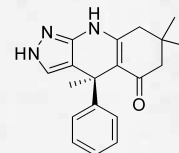

1

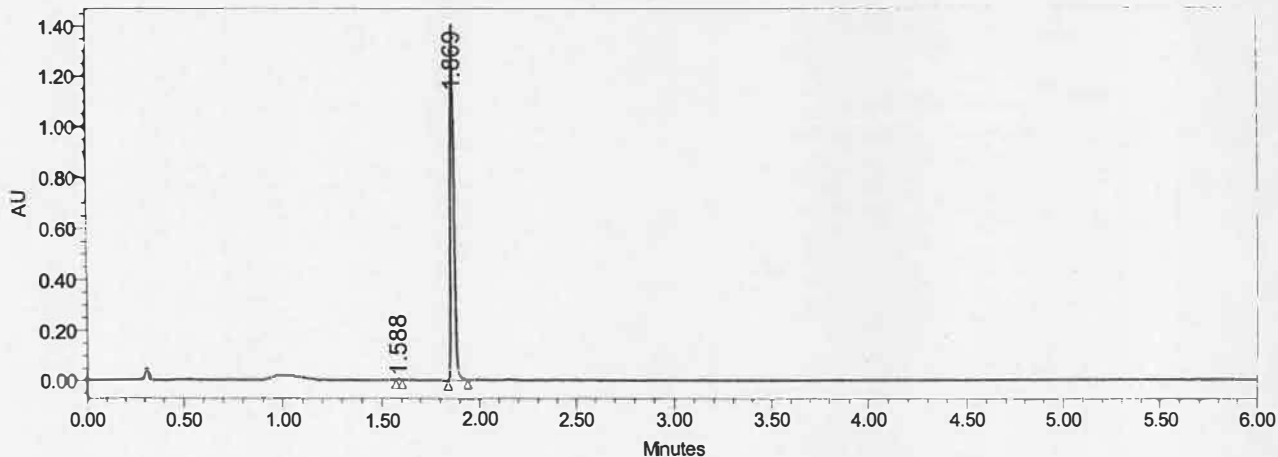

|   | RT   | Area    | % Area |
|---|------|---------|--------|
| 1 | 1.59 | 2625    | 0.16   |
| 2 | 1.87 | 1658635 | 99.84  |

**Sample Name** : SBF-MA1307-076Fr-I # IP13090066  
**User Name** : KSN  
**Vial No** : 10076  
**Injection volume** : 10  
**Method Name** : C:\CLASS-VP\Methods\CHIRAL5.met  
**Data File Name** : D:\D Drv\Data\A LC 02\SEPT-2013\030913D 9/3/2013 6:02:37 PM  
**Sample Description** : Column :: Chiral Pak IC (250 x 4.6mm,5µm)  
**Mobile Phase A** : 0.1%DEA in n-Hexane  
**Mobile Phase B** : DCM : CH3OH(50:50)  
**A : B** ::85:15  
**Flow Rate** : 1.0 ml/min.

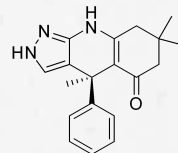

1

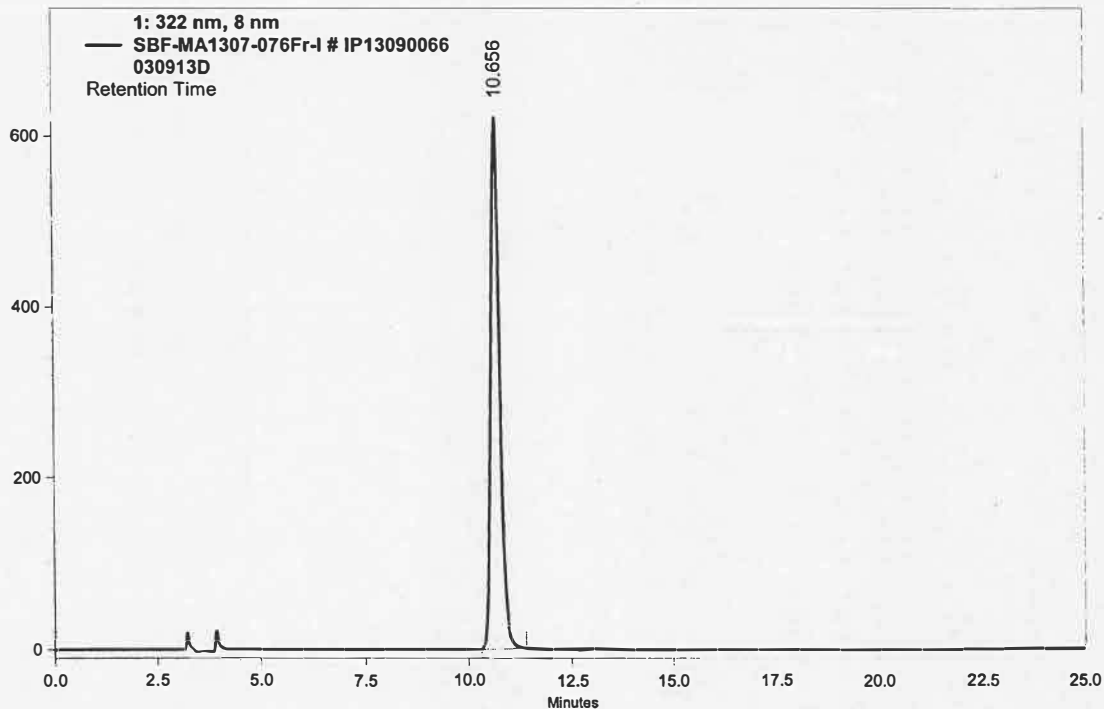

1: 322 nm, 8 nm

| nm   | Retention Time | Area    | Area Percent |
|------|----------------|---------|--------------|
| Pk # |                |         |              |
| 1    | 10.656         | 9362149 | 100.00       |

|               |  |         |        |
|---------------|--|---------|--------|
| <b>Totals</b> |  | 9362149 | 100.00 |
|---------------|--|---------|--------|



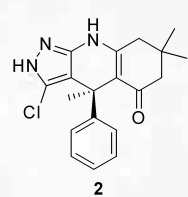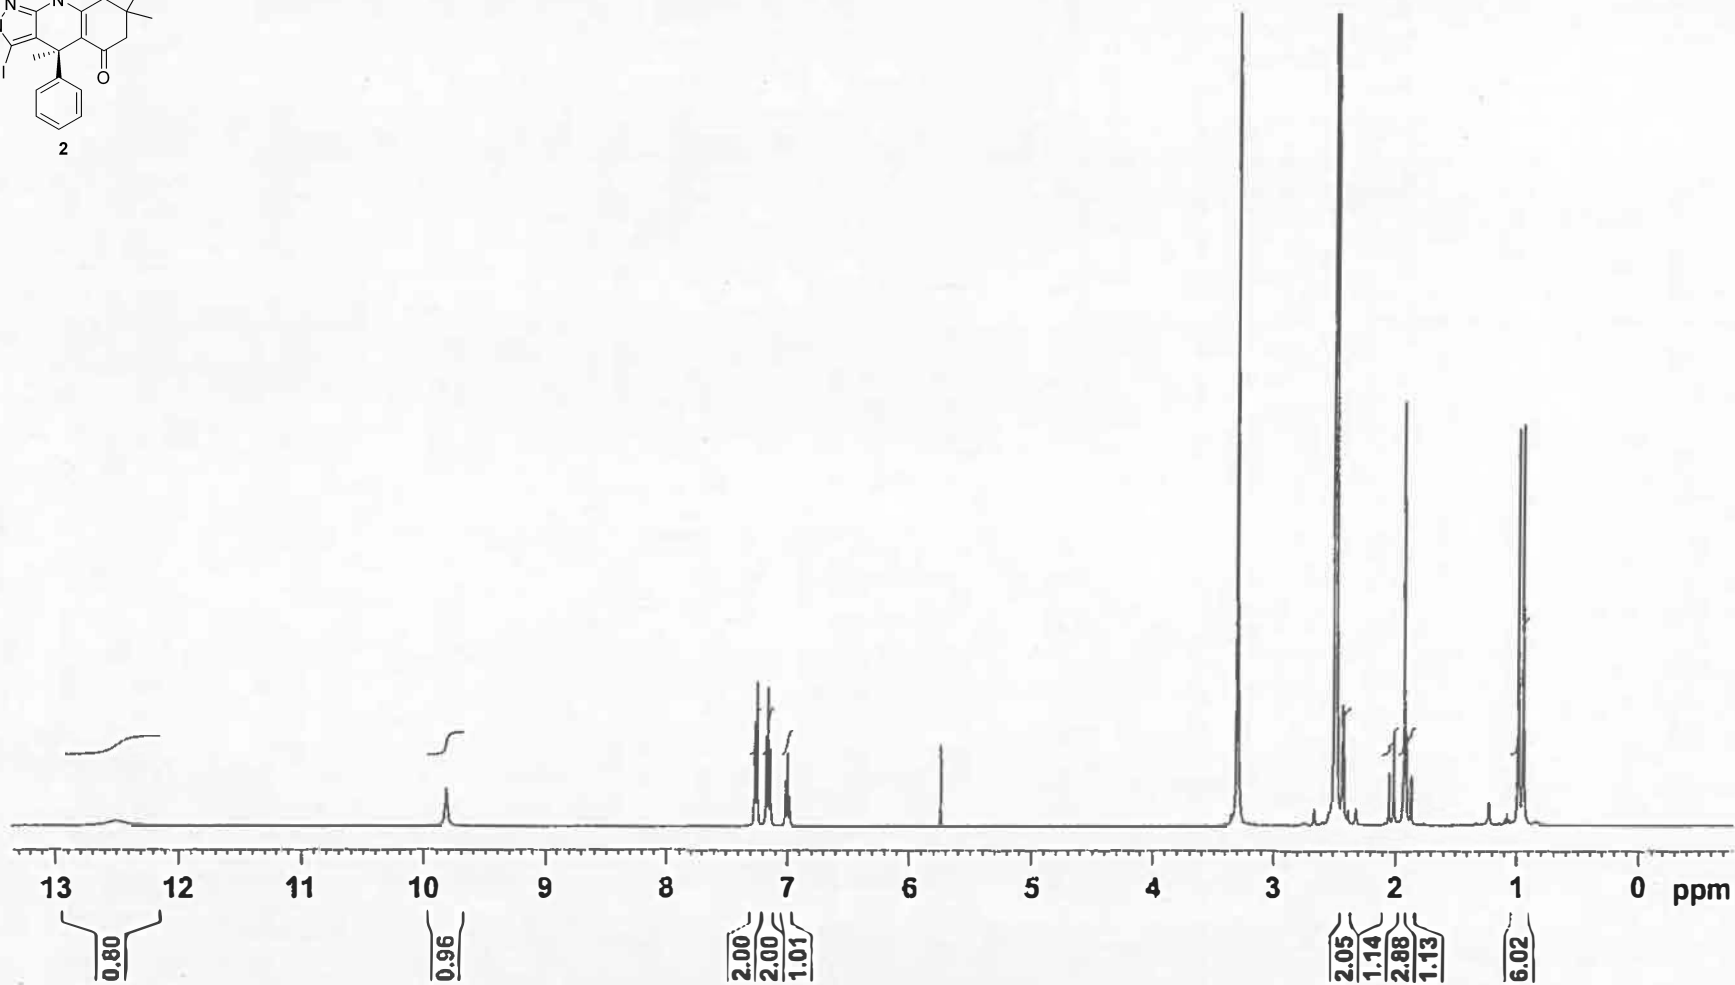

Sample Name: TBGSK-070Fr-I # IP13100992

Sample Type: Unknown

Vial: 1:C,5

Injection #: 1

Injection Volume: 1.00 ul

Run Time: 6.0 Minutes

Project Name: SAPL\_UNIT-2\_AMCL\_ALC-10-OCT-13

Acquired By:

Sample Set Name: 281013\_2

Acq. Method Set: PDA\_METH\_2A

Proc. Chnl. Descr.: PDA 210.0 nm

Date Acquired: 10/31/2013 1:55:50 PM IST

Column: Acquity UPLC BEH C-18 {2.1 x50mm,1.7u}

Column Temp:25°C

Mobile Phase:A: Acetonitrile

Mobile Phase:B:0.025% Aq TFA

Flow:0.5ml/min

Gradient programme:

T/%B:0.01/90,0.5/90,3/10,6/10

Diluent: ACN:Water

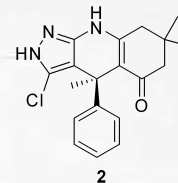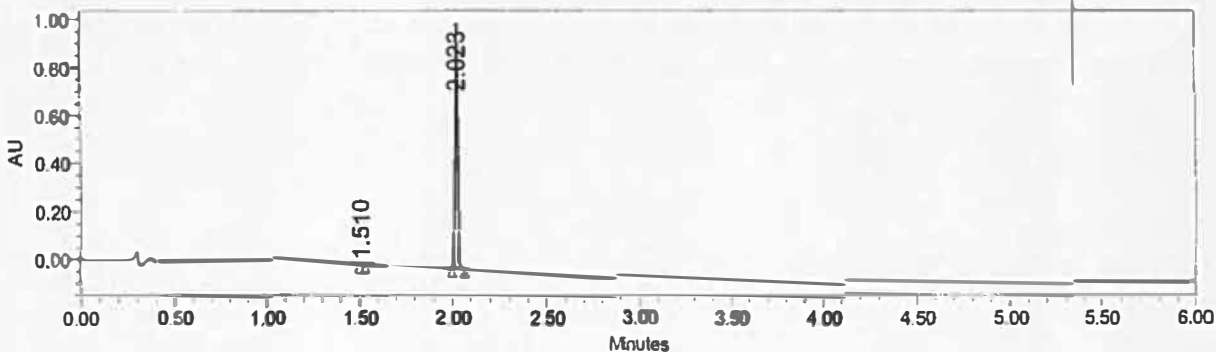

|   | RT   | Area   | % Area |
|---|------|--------|--------|
| 1 | 1.51 | 904    | 0.10   |
| 2 | 2.02 | 942711 | 99.90  |



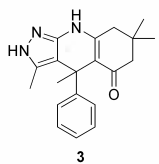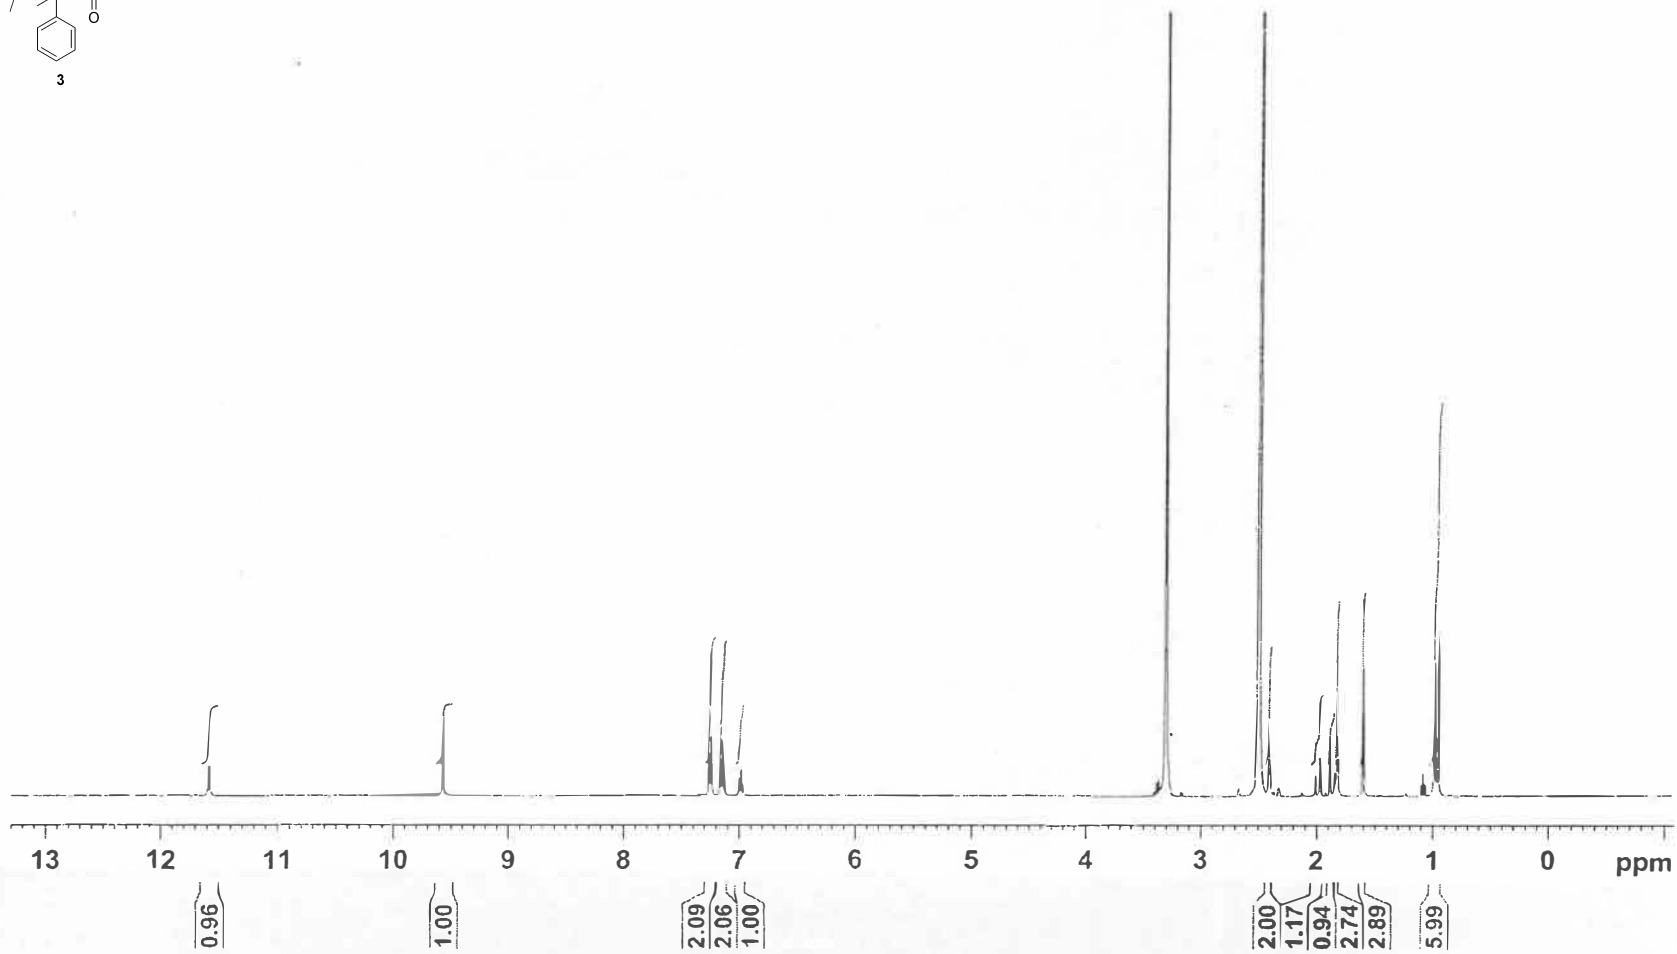

Sample Name: **SBF-MA1309-009-Fr-I # IP13070823**

Vial: 1:B,1

Injection Volume: 1.00 ul

Run Time: 6.0 Minutes

Project Name: SAPL\_UNIT-2\_AMCL\_ALC-13\_JUL-13

Acquired By: System

Acq. Method Set: PDA\_METH\_2A

Proc. Chnl. Descr.: PDA 210.0 nm

Date Acquired: 7/29/2013 12:15:43 PM IST

Column : Acquity BEH C-18 (50 x2.1mm,1.7 $\mu$ .)

Column Temp : 25°C

Mobile Phase A : Acetonitrile

Mobile Phase B : 0.025% TFA (Aq)

Flow Rate : 0.50 mL/Min

Time/% B : 0/90,0.5/90,3/10,6/10

Diluent : ACN:Water

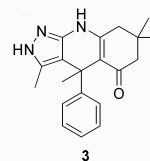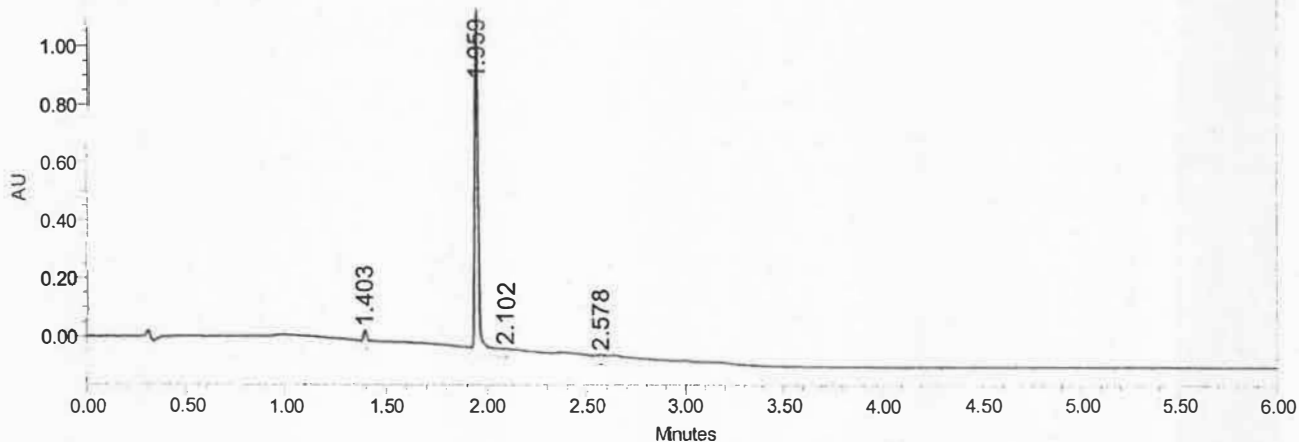

|   | RT   | Area    | % Area |
|---|------|---------|--------|
| 1 | 1.40 | 32202   | 2.57   |
| 2 | 1.96 | 1216462 | 97.05  |
| 3 | 2.10 | 1866    | 0.15   |
| 4 | 2.58 | 2867    | 0.23   |

**Sample Name** : SBF-MA1309-009Fr-I# IP13070880  
**User Name** : CSB  
**Vial No** : 20016  
**Injection volume** : 15  
**Method Name** : C:\CLASS-VPMethods\Chiral1.met  
**Data File Name** : D:\D Drv\Data\A LC 02\JULY-2013\300713E 7/30/2013 6:33:44 PM  
**Sample Description** : Column :CHIRALPAK- IC (250 x 4.6mm,5µm)  
**Mobile Phase A** : 0.1%DEA in n-Hexane  
**Mobile Phase B** :DCM:MeOH(50:50)  
**A : B** :: 90:10  
**Flow Rate** : 1.0 ml/min.

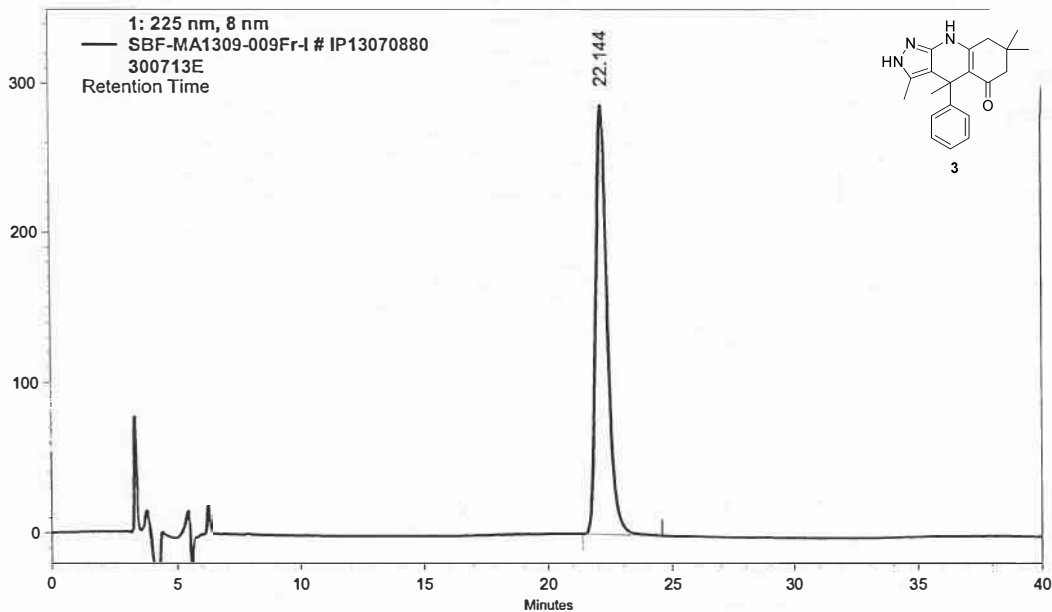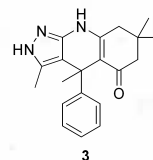

1: 225 nm, 8 nm

| nm            | Retention Time | Area           | Area Percent  |
|---------------|----------------|----------------|---------------|
| 1             | 22.144         | 9092006        | 100.00        |
| <b>Totals</b> |                | <b>9092006</b> | <b>100.00</b> |

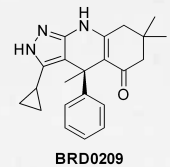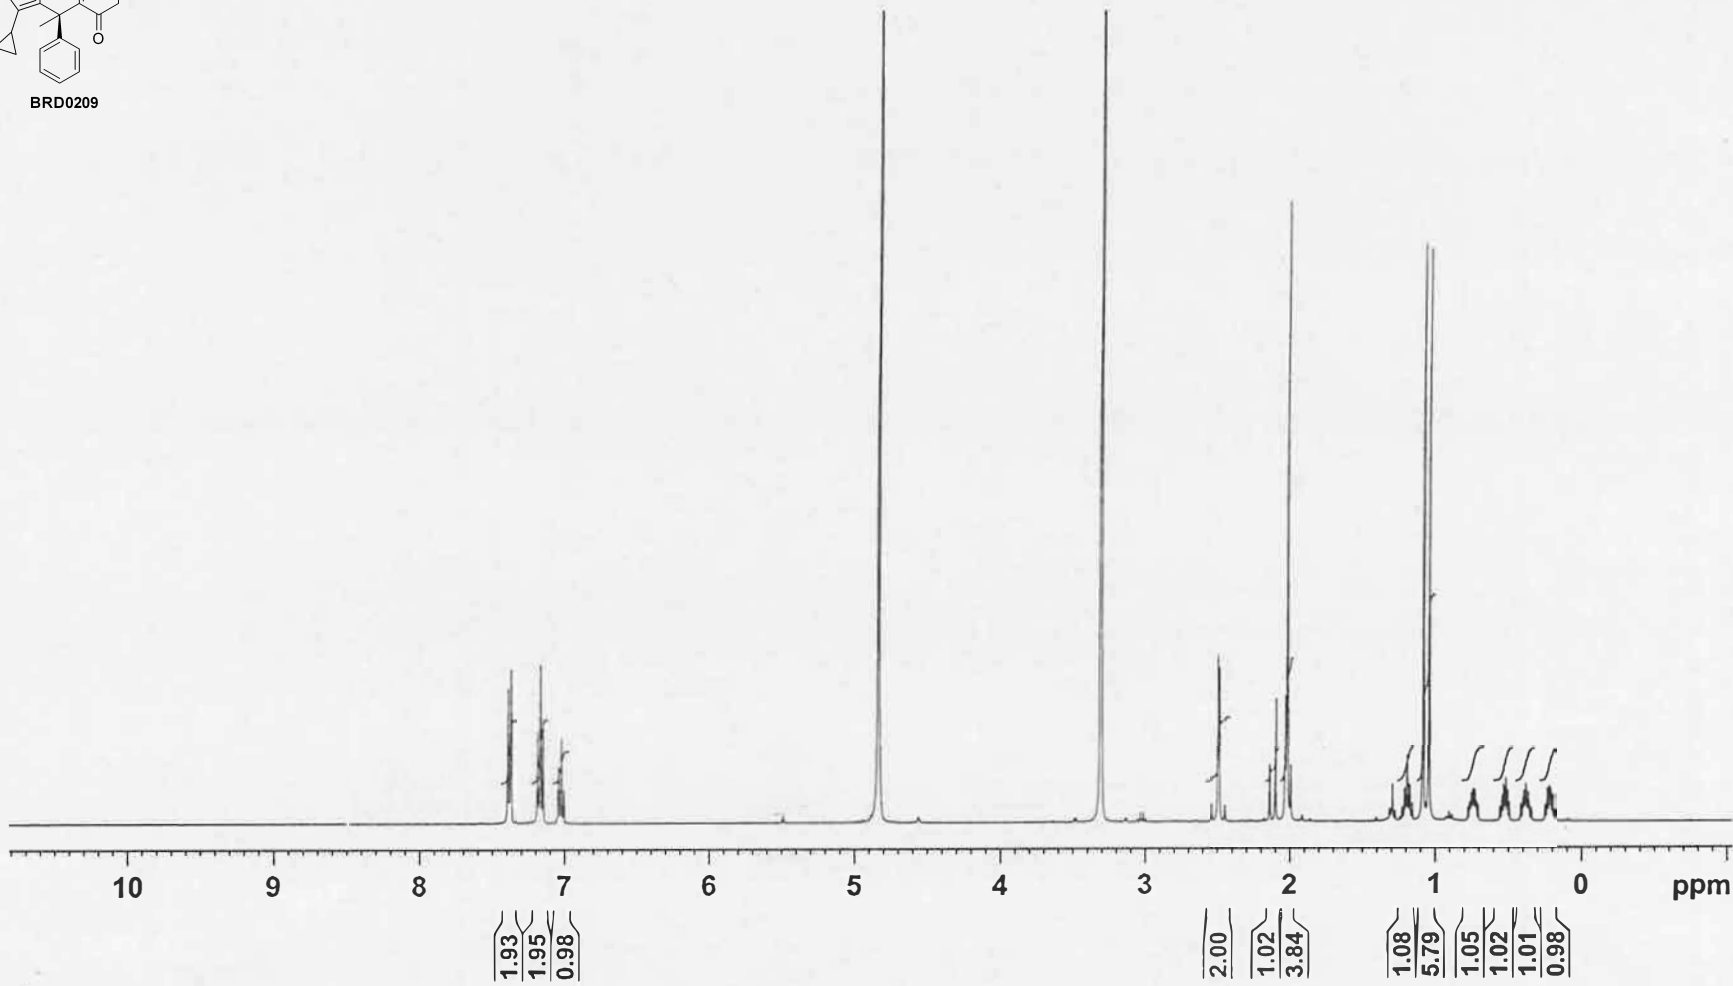

Sample Name: **BRD-7079-Fr-I # IP13080229**

Acquired By: System

Vial: 2:D,2

Acq. Method Set: PDA\_METH\_2A

Injection Volume: 0.50 µl

Proc. Chnl. Descr.: **PDA 210.0 nm**

Run Time: 6.0 Minutes

Date Acquired: 8/7/2013 8:41:11 PM IST

Project Name: SAPL\_UNIT-2\_AMCL\_ALC-13\_AUG-13

Column : Acquity BEHC-18 (50 x2.1mm,1.7µ<sub>m</sub>)

Column Temp : 25°C

Mobile Phase A : Acetonitrile

Mobile Phase B : 0.025% TFA (Aq)

Flow Rate : 0.50 mL/Min

Time/% B : 0/90,0.5/90,3/10,6/10

Diluent : ACN:Water

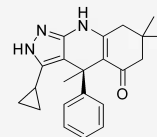

BRD0209

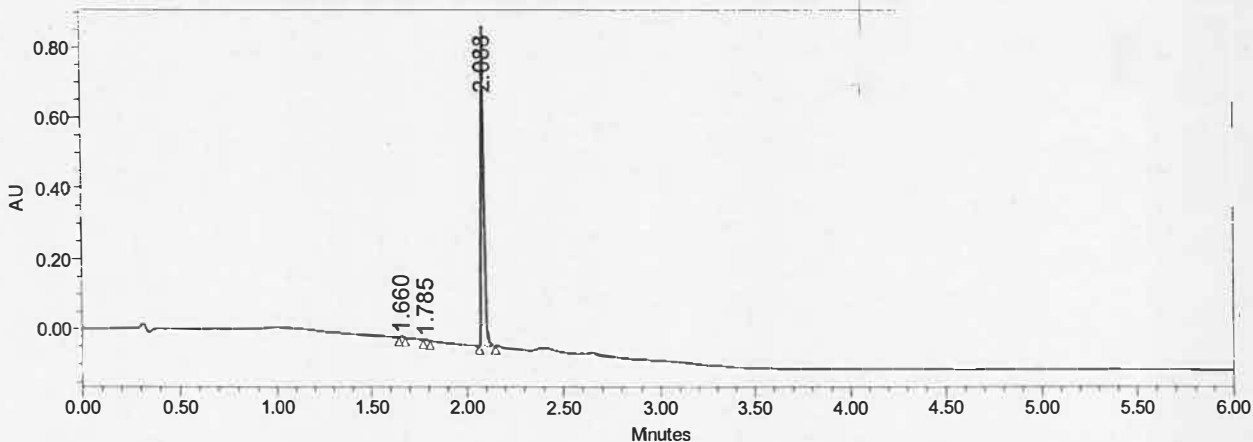

|   | RT   | Area   | % Area |
|---|------|--------|--------|
| 1 | 1.66 | 4195   | 0.43   |
| 2 | 1.79 | 1477   | 0.15   |
| 3 | 2.09 | 960323 | 99.41  |



**Sample Name** : BRD7079Fr-I # IP13080232  
**User Name** : KSN  
**Vial No** : 10001  
**Injection volume** : 10  
**Method Name** : C:\CLASS-VP\Methods\Chiral1.met  
**Data File Name** : D:\D Drv\Data\A LC 02\AUG-2013\080813D 8/8/2013 2:38:23 PM  
**Sample Description** : Column : Cciral pak IC (250 x 4.6mm,5µm)  
**Mobile Phase A** : 0.1%DEA in n-Hexane  
**Mobile Phase B** : DCM:MEOH(50:50)  
**A : B** :: 90:10  
**Flow Rate** : 1.0 ml/min.

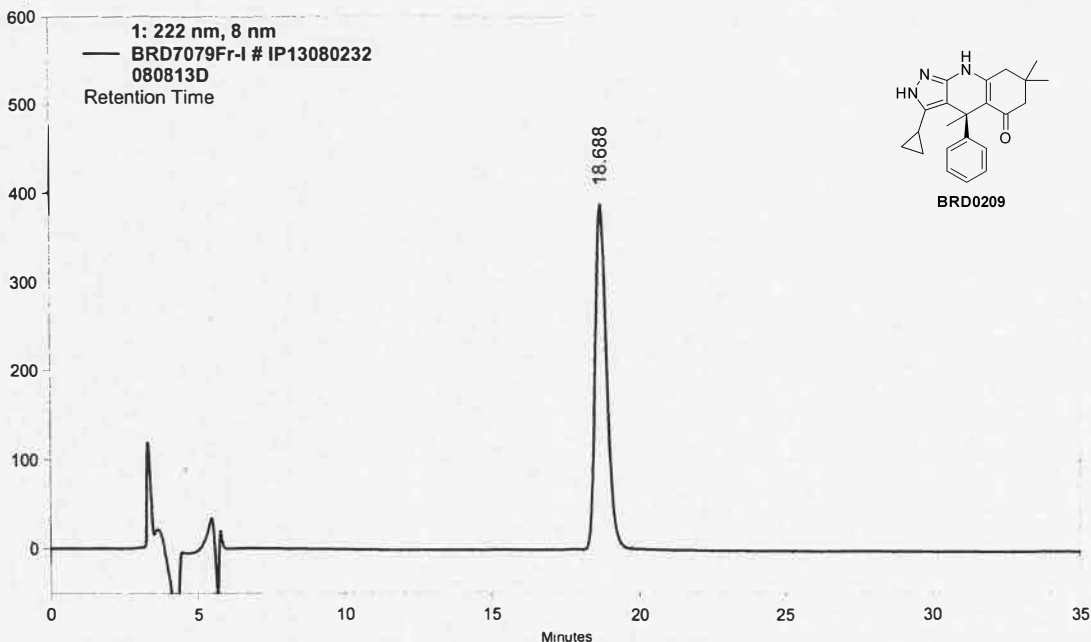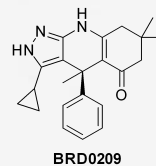

1: 222 nm, 8 nm

| Pk #          | Retention Time | Area     | Area Percent |
|---------------|----------------|----------|--------------|
| 1             | 18.688         | 10373413 | 100.00       |
| <b>Totals</b> |                | 10373413 | 100.00       |

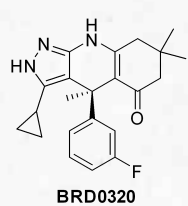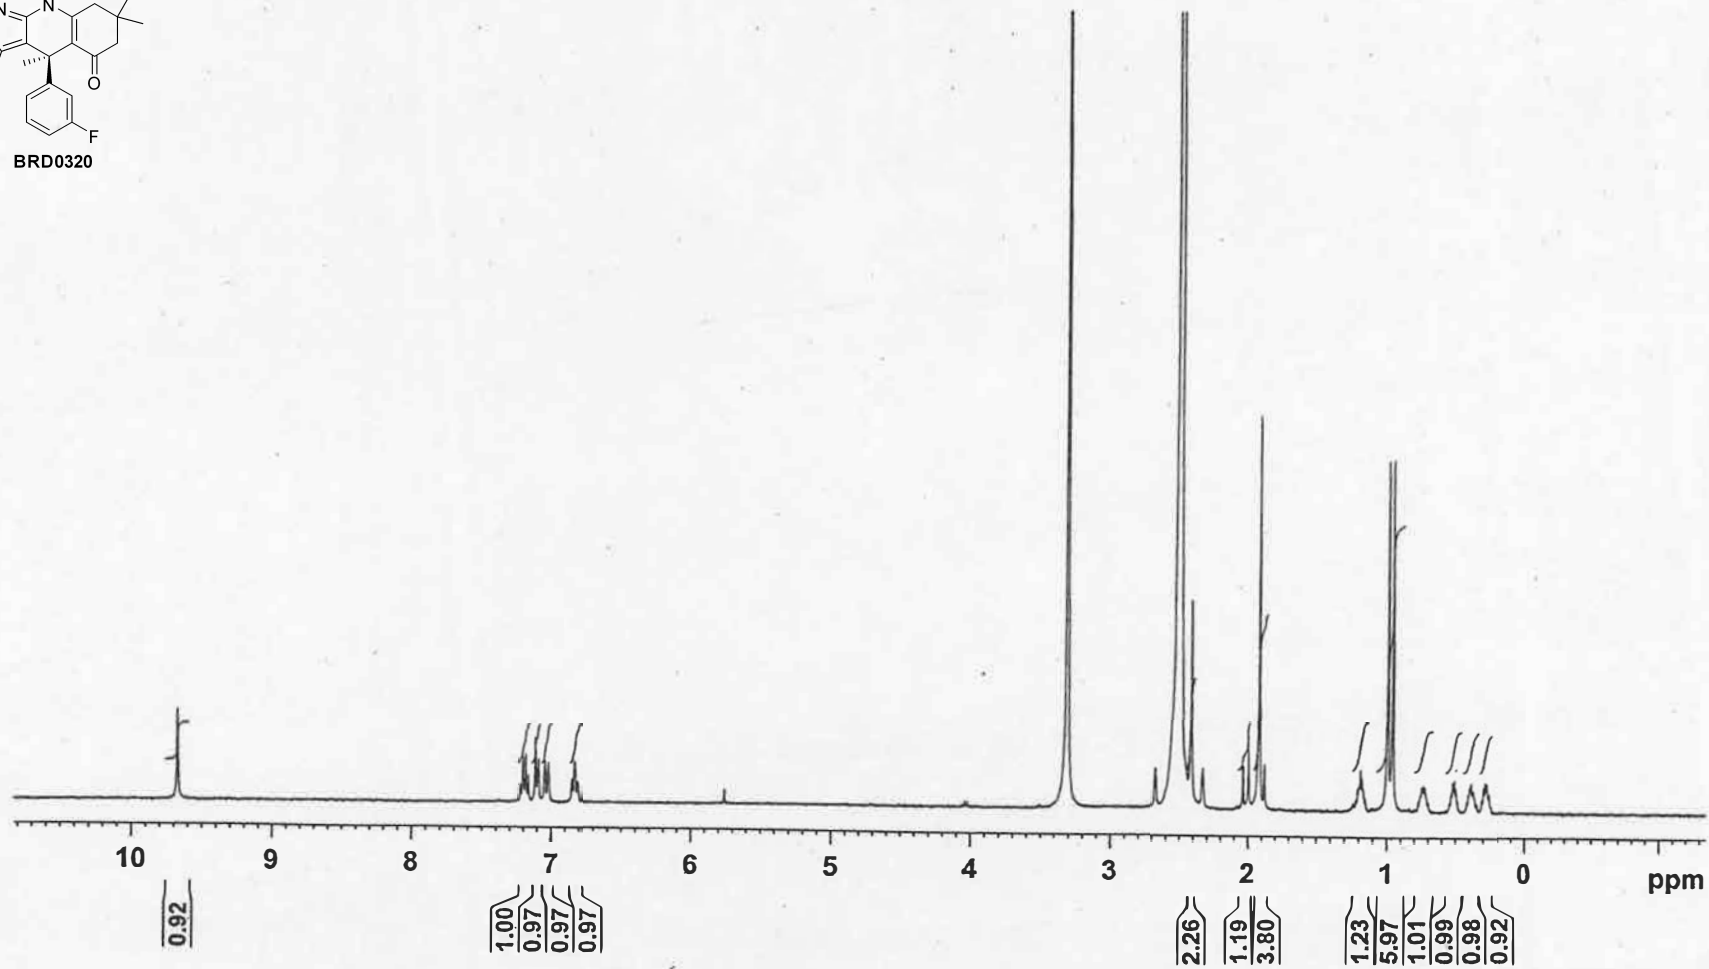

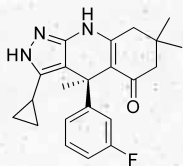

BRD0320

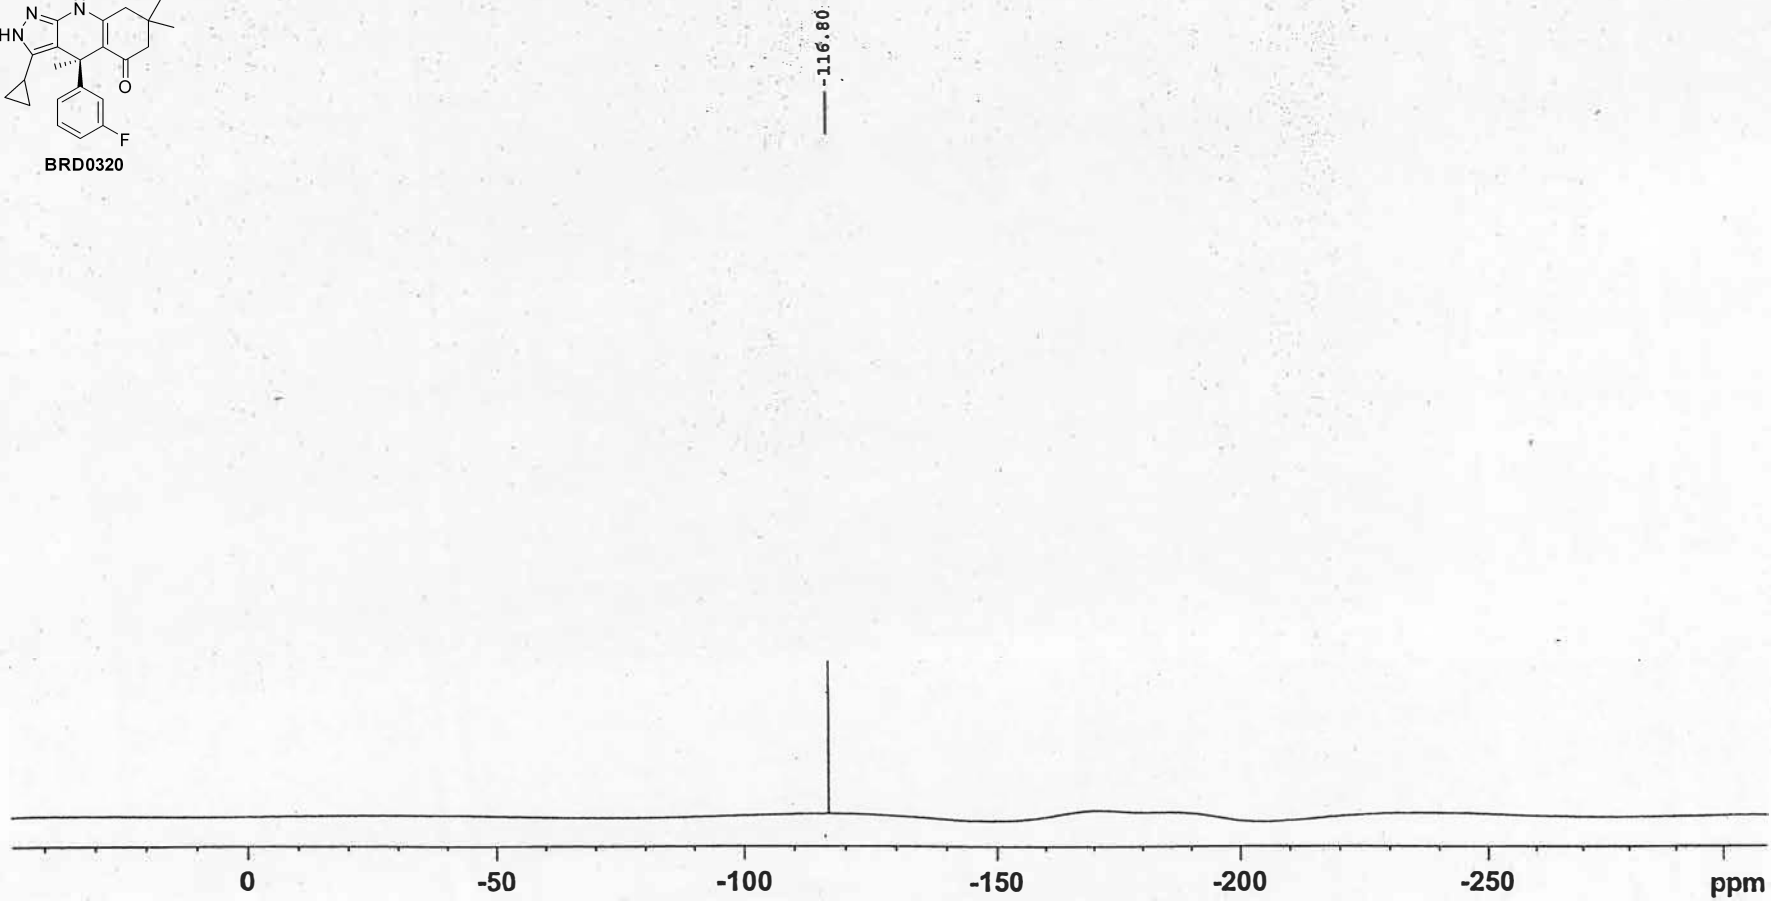

**Sample Name:** SBF-MA1316-004-Fr-II # IP14010221 **Acquired By:** System  
**Sample Type:** Unknown **Sample Set Name:** 070114\_1  
**Vial:** 1:E,3 **Acq. Method Set:** PDA\_METH\_2A  
**Injection #:** 1 **Proc. Chnl. Descr.:** PDA 210.0 nm  
**Injection Volume:** 0.50 ul **Date Acquired:** 1/7/2014 9:17:42 PM IST  
**Run Time:** 6.0 Minutes  
**Project Name:** SAPL\_UNIT-2\_AMCL\_ALC-10-JAN-14

**Column:** Acquity UPLC BEH C-18 (2.1 x50mm,1.7u)  
**Column Temp:** 25°C  
**Mobile Phase:** A: Acetonitrile  
**Mobile Phase:** B: 0.025% Aq TFA  
**Flow:** 0.5ml/min  
**Gradient program:**  
**T1%B:** 0.01/90, 0.5/90, 3/10, 6/10  
**Diluent:** ACN:Water

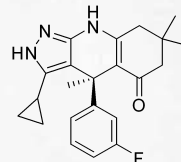

BRD0320

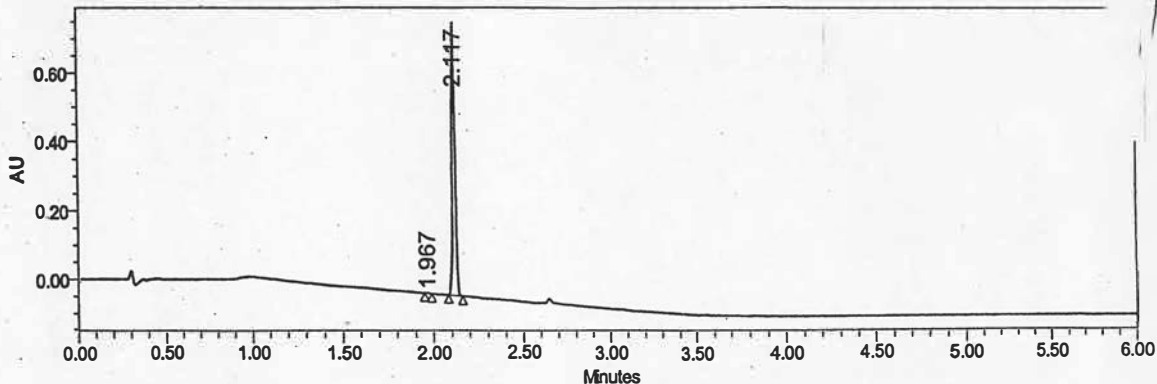

|   | RT   | Area   | % Area |
|---|------|--------|--------|
| 1 | 1.97 | 1305   | 0.14   |
| 2 | 2.12 | 946364 | 99.86  |

Column : Chiral Pak ADH (250x4.6mm, 5µm),  
 Mobile Phase A : 0.1% DEA in n- Hexane  
 Mobile Phase B : EtOH  
 A : B : 85:15  
 Flow : 1.0ml/min.

Injection Date : Wed, 8. Jan. 2014      Location : Vial 2  
 Sample Name : >SBF-MA1316-004Fr-II # IP14010228      Inj. No. :  
 Acq Operator : KSN      Inj. Vol. : 10 µl  
 Acq. Method : C:\CHEM32\1\METHODS\CHIRAL.M  
 Analysis Method : C:\CHEM32\1\METHODS\CHIRAL.M  
 Last Changed : Fri, 3. Jan. 2014, 08:43:38 pm

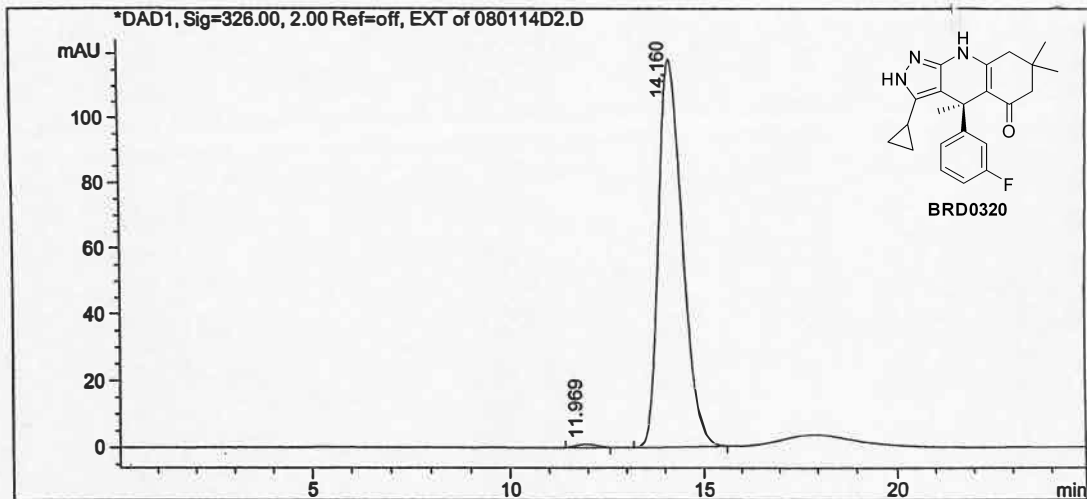

Signal 1: DAD1, Sig=326.00, 2.00 Ref=off, EXT

| Peak # | RT [min] | Type | Width [min] | Area     | Area % |
|--------|----------|------|-------------|----------|--------|
| 1      | 11.969   | MM   | 0.602       | 37.963   | 0.749  |
| 2      | 14.160   | MM   | 0.709       | 5028.838 | 99.251 |

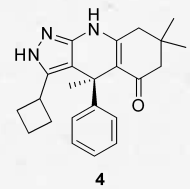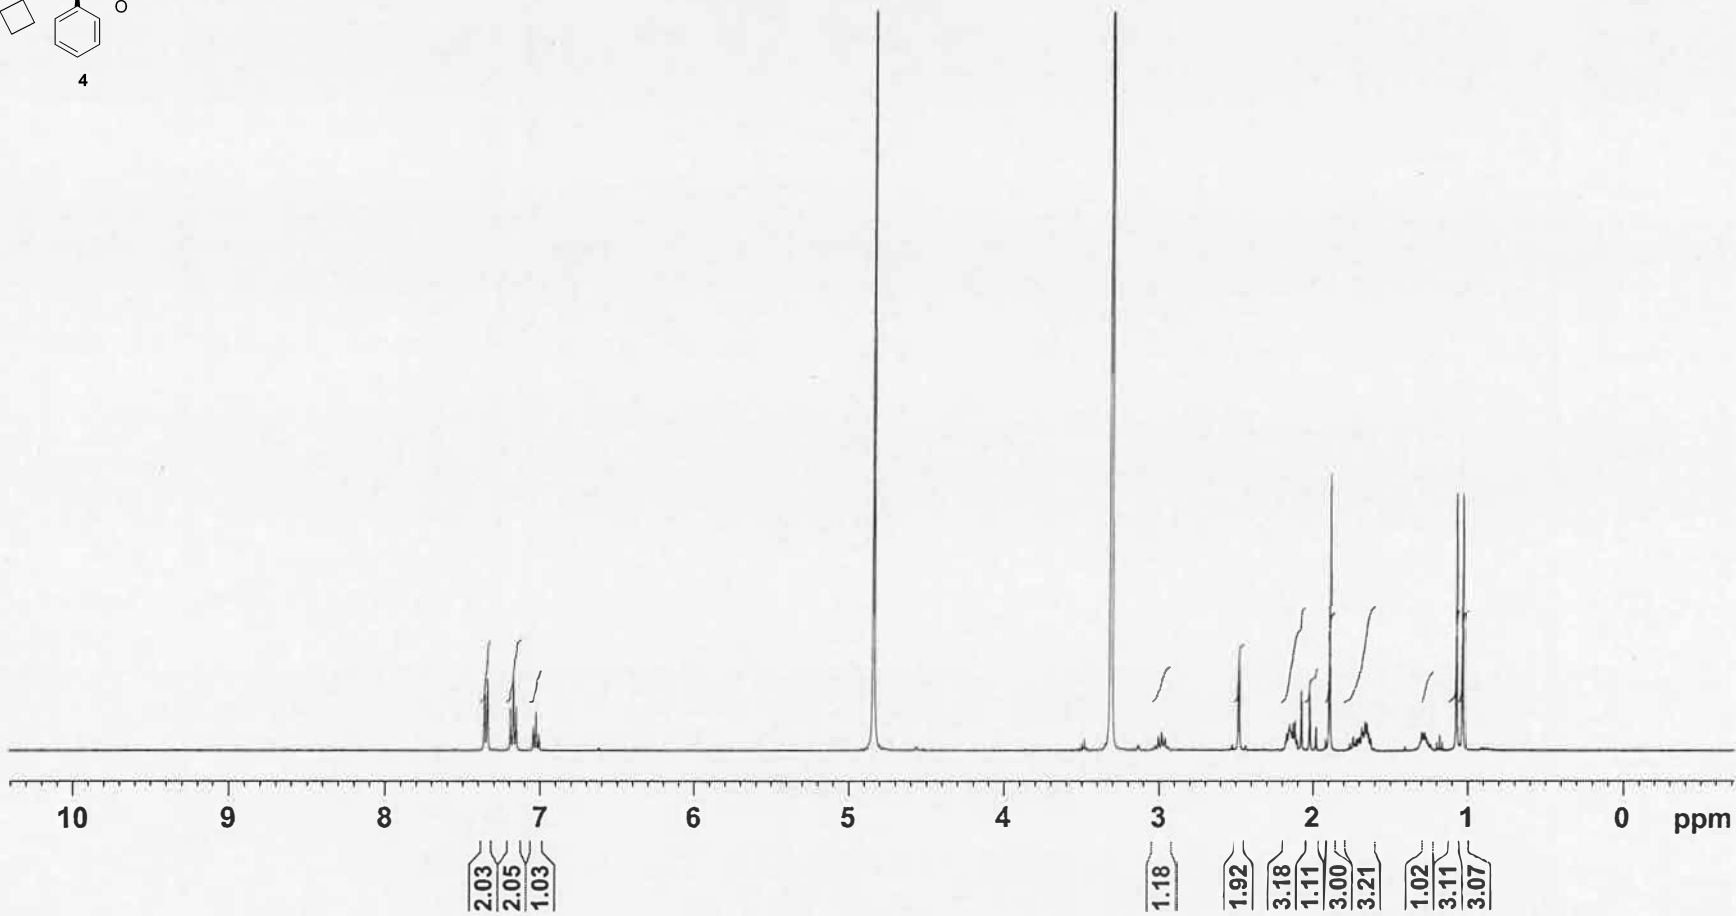

**Sample Name:** SBF-MA1309-091-Fr-I # IP13111011      **Acquired By:**      **System**  
**Sample Type:** Unknown      **Sample Set Name:** 261113\_1  
**Vial:** 1:B,8      **Acq. Method Set:** PDA\_METH\_2A  
**Injection #:** 1      **Proc. Chnl. Descr.:** PDA 210.0 nm  
**Injection Volume:** 1.00 ul      **Date Acquired:** 11/26/2013 2:16:25 PM IST  
**Run Time:** 6.0 Minutes  
**Project Name:** SAPL\_UNIT-2\_AMCL\_ALC-10-NOV-13

**Column:** Acquity UPLC BEH C-18 {2.1 x50mm,1.7u}  
**Column Temp:** 25°C  
**Mobile Phase:A:** Acetonitrile  
**Mobile Phase:B:** 0.025% Aq TFA  
**Flow:** 0.5ml/min  
**Gradient progame:**  
**T/%B:** 0.01/90,0.5/90,3/10,6/10  
**Diluent:** ACN:Water

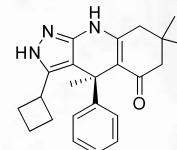

4

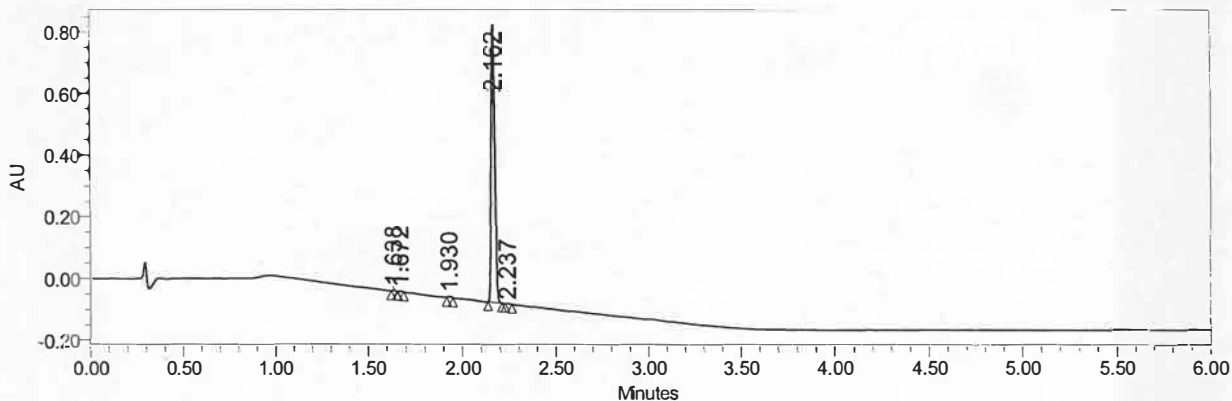

|   | RT   | Area    | % Area |
|---|------|---------|--------|
| 1 | 1.64 | 1837    | 0.15   |
| 2 | 1.67 | 2896    | 0.24   |
| 3 | 1.93 | 4612    | 0.38   |
| 4 | 2.16 | 1190678 | 99.11  |
| 5 | 2.24 | 1391    | 0.12   |

Acquired by : CSB  
 Sample Name : SBF-MA1309-091-Fr-I  
 Sample ID : IP13111013  
 Vial # : 34  
 Injection Volume : 40 uL  
 Data File Name : 261113H.lcd  
 Method File Name : CHIRAL.lcm  
 Report File Name : Default.lcr  
 Data Acquired : 11/26/2013 5:23:02 PM  
 Description : Column: CHIRALPAK-IA (250 X 4.6mm, 5µm)  
 Mobile Phase A : 0.1% DEA in n-Hexane  
 Mobile Phase B : DCM : MeOH ( 50 : 50 )  
 A : B :: 90 : 10.  
 Flowrate: 1.00 mL/min.

SBF-MA1309-091-Fr-I D:\ALC01\NOV-2013\261113H.lcd

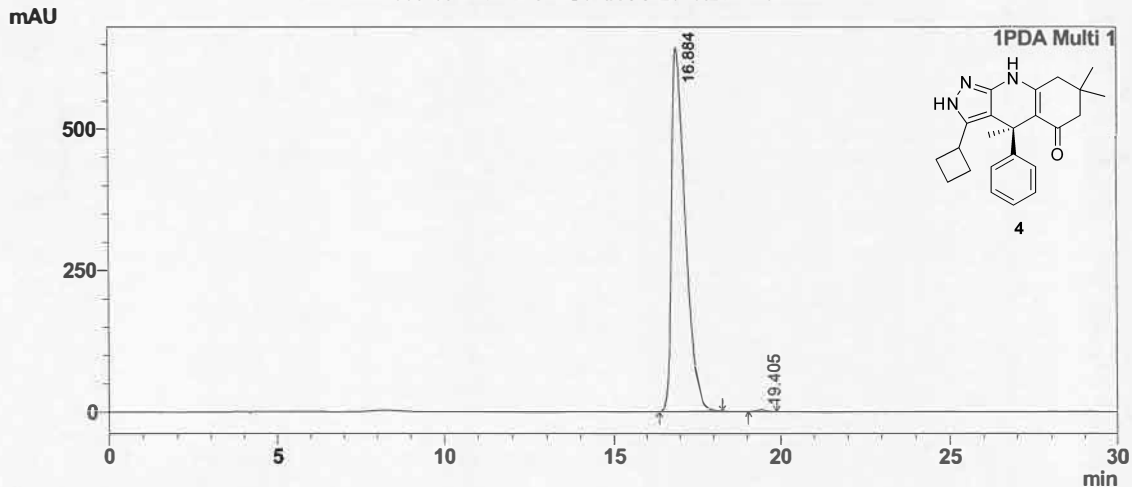

1 PDA Multi 1/328nm 4nm

PeakTable

PDA Ch1 328nm 4nm

| Peak# | Ret. Time | Area     | Height | Area %  |
|-------|-----------|----------|--------|---------|
| 1     | 16.884    | 19086398 | 644058 | 99.661  |
| 2     | 19.405    | 64924    | 2813   | 0.339   |
| Total |           | 19151322 | 646871 | 100.000 |



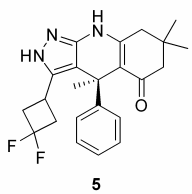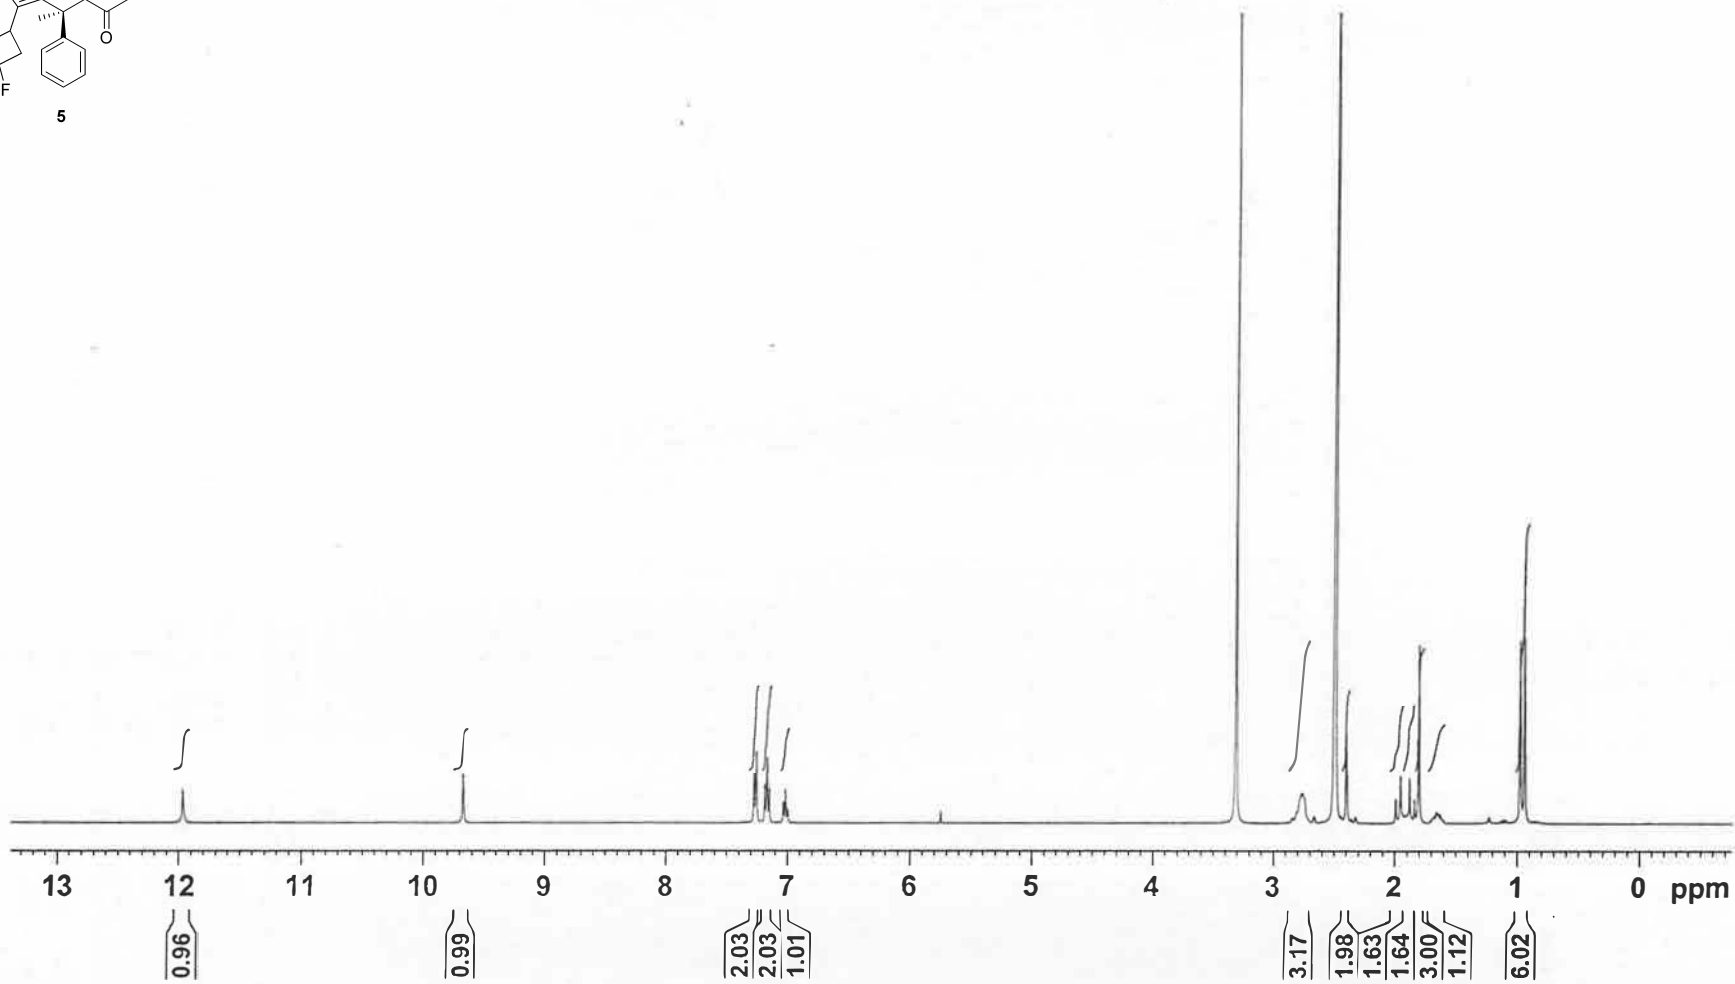

Sample Name: BRD-7625-Fr-I # IP13080166  
Vial: 1:D,8  
Injection Volume: 0.50 ul  
Run Time: 6.0 Minutes  
Project Name: SAPL\_UNIT-2\_AMCL\_ALC-13\_AUG-13

Acquired By: System  
Acq. Method Set: PDA\_METH\_2A  
Proc. Chnl. Descr.: PDA 210.0 nm  
Date Acquired: 8/6/2013 7:19:27 PM IST

Column : Acquity BEH C-18 (50 x2.1mm,1.7μ,)  
Column Temp : 25°C  
Mobile Phase A : Acetonitrile  
Mobile Phase B : 0.025% TFA (Aq)  
Flow Rate : 0.50 mL/Min  
Time/% B : 0/90,0.5/90,3/10,6/10  
Diluent : ACN:Water

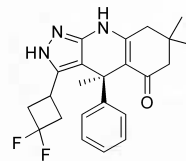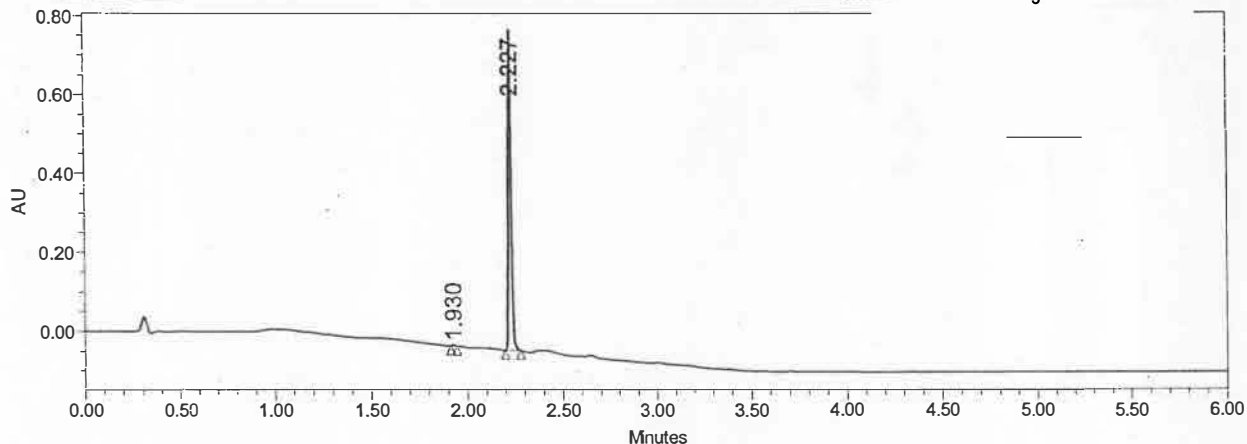

|   | RT   | Area   | % Area |
|---|------|--------|--------|
| 1 | 1.93 | 3962   | 0.44   |
| 2 | 2.23 | 888506 | 99.56  |

Acquired by : CSB  
 Sample Name : BRD7625-Fr-I  
 Sample ID : IP13080168  
 Vial # : 1  
 Injection Volume : 50 uL  
 Data File Name : 070813J.Icd  
 Method File Name : CHIRAL.Icm  
 Report File Name : Default.lcr  
 Data Acquired : 8/7/2013 6:22:06 PM  
 Description : Column : CHIRALPAK-IC (250x 4.6mm, 5µ)  
 Mobile Phase A : 0.1% DEA in n-Hexane  
 Mobile Phase B : DCM-CH3OH (50:50)  
 A : B :: 90 : 10.  
 Flow Rate : 1.0 mL/min.

BRD7625-Fr-I D:\ALC01\AUG-2013\070813J.Icd

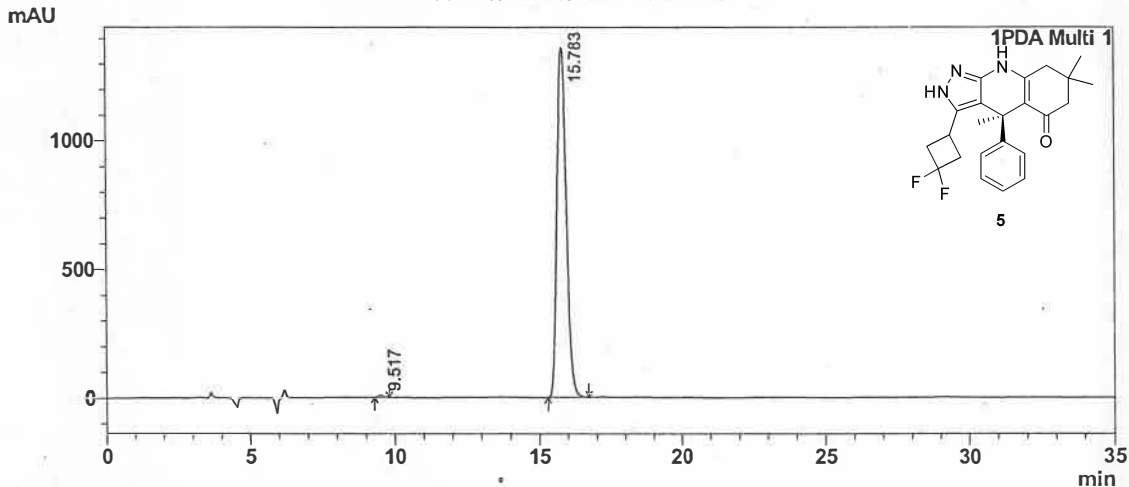

1 PDA Multi 1/225nm 4nm

PeakTable

PDA Ch1 225nm 4nm

| Peak# | Ret. Time | Area     | Height  | Area %  |
|-------|-----------|----------|---------|---------|
| 1     | 9.517     | 93202    | 8331    | 0.309   |
| 2     | 15.783    | 30069656 | 1361364 | 99.691  |
| Total |           | 30162858 | 1369695 | 100.000 |

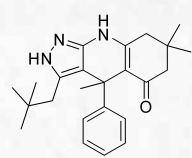

BRD3731

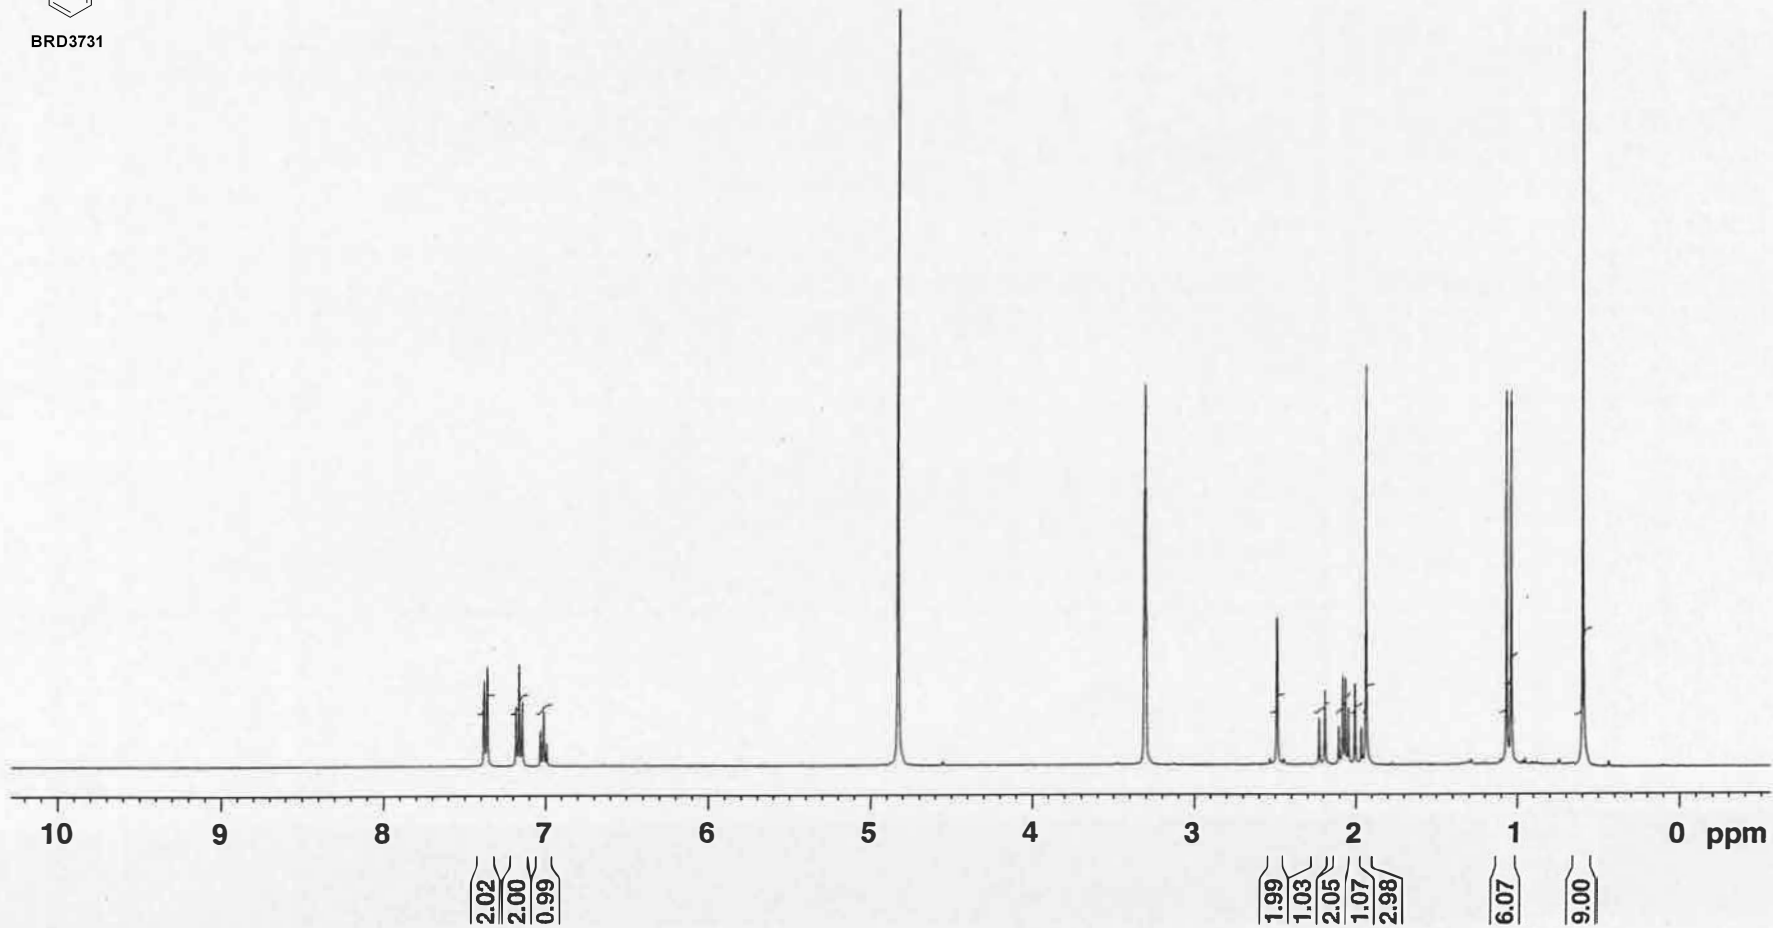

Sample Name: **SBF-MA1410-019-Fr-I # IP14120169**

Acquired By: System

Vial: 2:B,4

Acq. Method Set: PDA\_METH\_2A

Injection Volume: 0.50 ul

Proc. Chnl. Descr.: **PDA 210.0 nm**

Run Time: 6.0 Minutes

Date Acquired: 12/9/2014 5:17:32 PM IST

Project Name: SAPL\_UNIT-2\_AMCL\_ALC-13\_DEC-14

Column : Acquity UPLC BEH C-18 (50 x2.1mm,1.7 $\mu$ ,)

Column Temp : 25°C

Mobile Phase A : Acetonitrile

Mobile Phase B : 0.025% Aq.TFA

Flow Rate : 0.5 mL/Min

Time/% B : 0.01/90,0.5/90,3/10,6/10

Diluent : ACN:Water

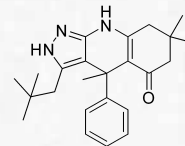

BRD3731

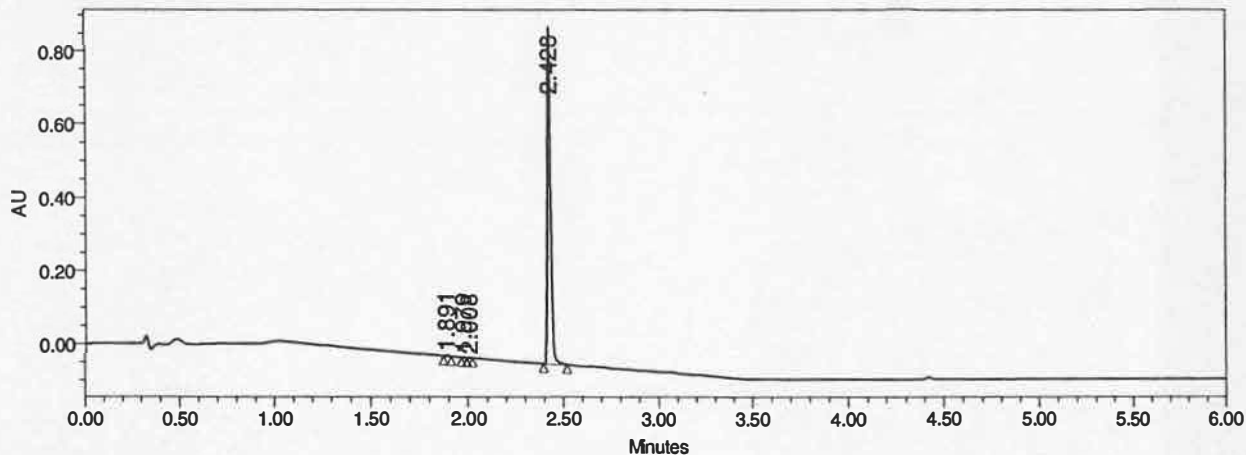

|   | RT   | Area    | % Area |
|---|------|---------|--------|
| 1 | 1.89 | 2970    | 0.27   |
| 2 | 1.98 | 1055    | 0.10   |
| 3 | 2.01 | 1187    | 0.11   |
| 4 | 2.43 | 1101179 | 99.53  |



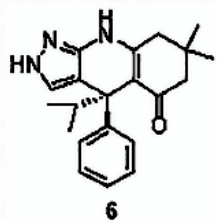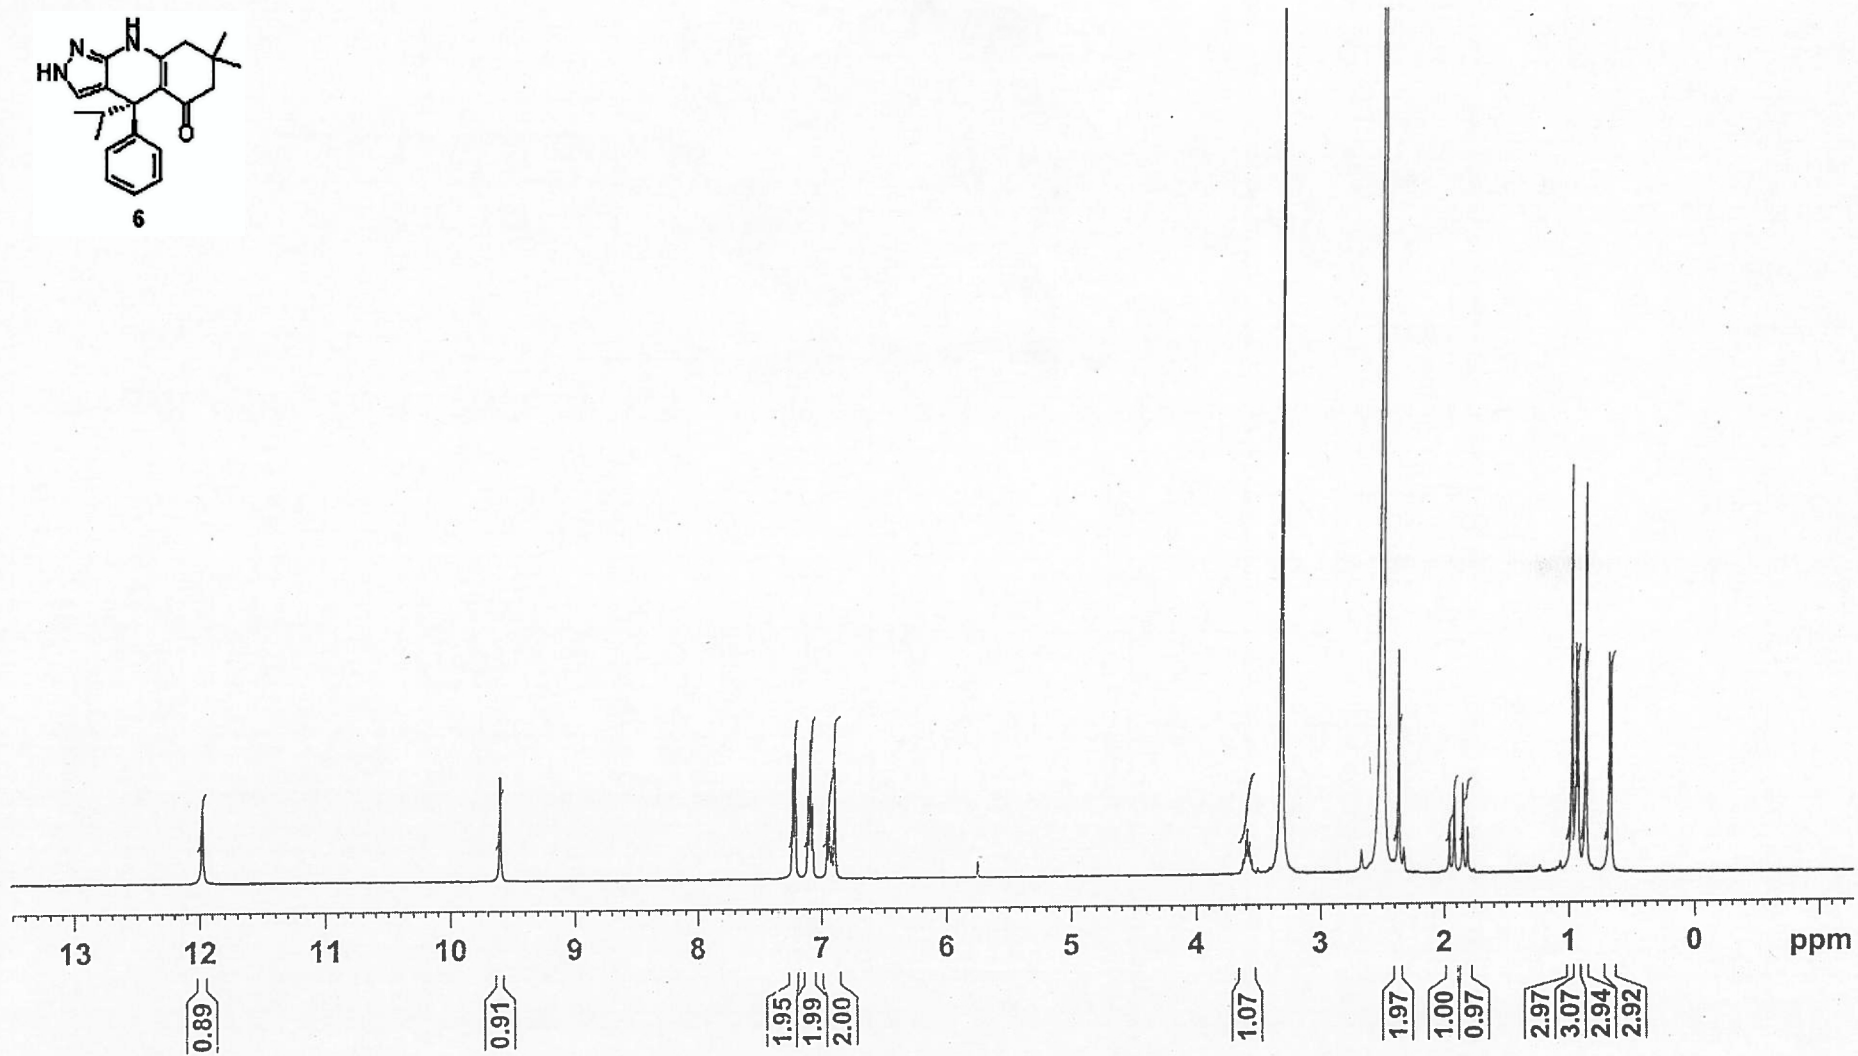

Sample Name: **BRD-2366-Fr-II # IP14010449**

Sample Type: Unknown

Vial: 1:B,2

Injection #: 1

Injection Volume: 0.50  $\mu$ l

Run Time: 6.0 Minutes

Project Name: SAPL\_UNIT-2\_AMCL\_ALC-10-JAN-14

Acquired By: System

Sample Set Name: 150114\_1

Acq. Method Set: PDA\_METH\_2A

Proc. Chnl. Descr.: PDA 210.0 nm

Date Acquired: 1/15/2014 3:19:01 PM IST

Column: Acquity UPLC BEH C-18 {2.1 x50mm,1.7 $\mu$ }

Column Temp:25 $^{\circ}$ C

Mobile Phase:A: Acetonitrile

Mobile Phase:B:0.025% Aq TFA

Flow:0.5ml/min

Gradient programme:

T/%B:0.01/90,0.5/90,3/10,6/10

Diluent: ACN:Water

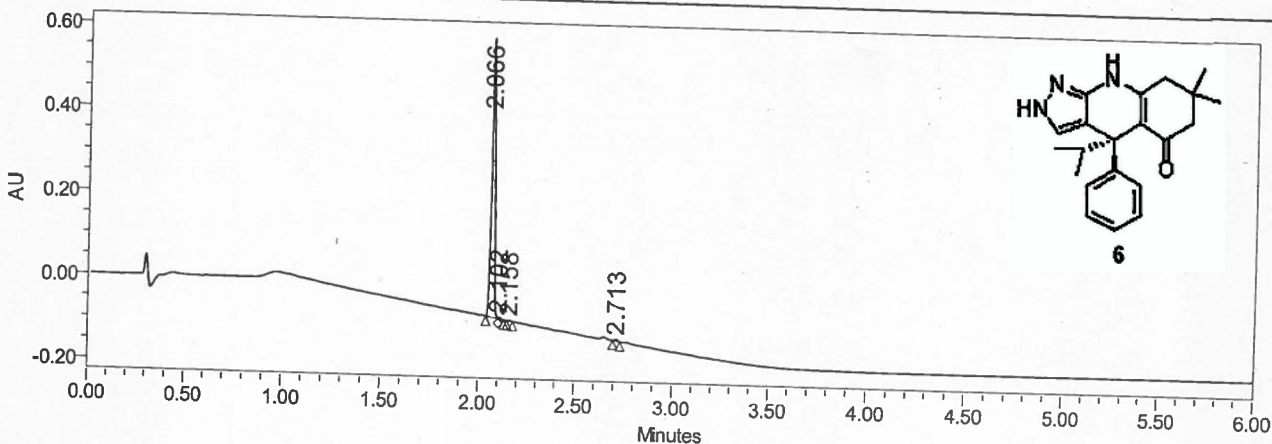

|   | RT   | Area   | % Area |
|---|------|--------|--------|
| 1 | 2.07 | 813844 | 98.89  |
| 2 | 2.10 | 3232   | 0.39   |
| 3 | 2.16 | 1377   | 0.17   |
| 4 | 2.71 | 4537   | 0.55   |



Data file : C:\CHEM32\1\DATA\JAN-2014\100114A.D  
Column : Chiralpak AD-H(250x4.6mm,5µm),  
Mobile Phase A : 0.1%DEA n- Hexane  
Mobile Phase B : EtOH  
A : B : 85:15  
Flow : 1.0ml/min.

Injection Date : Fri, 10. Jan. 2014  
Sample Name : >BRD2366Fr-II # IP14010367  
Acq Operator : KSN  
Acq. Method : C:\CHEM32\1\METHODS\CHIRAL.M  
Analysis Method : C:\CHEM32\1\METHODS\CHIRAL.M  
Last Changed : Thu, 9. Jan. 2014, 05:32:36 pm

Location : Vial 31  
Inj. No. :  
Inj. Vol. : 20 µl

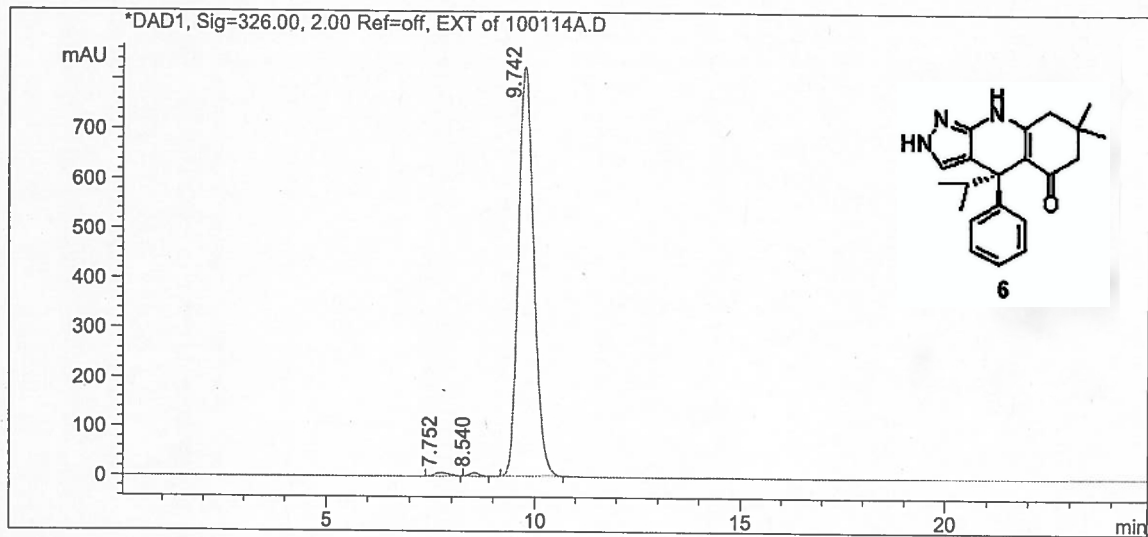

Signal 1: DAD1, Sig=326.00, 2.00 Ref=off, EXT

| Peak # | RT [min] | Type | Width [min] | Area      | Area % |
|--------|----------|------|-------------|-----------|--------|
| 1      | 7.752    | MM   | 0.424       | 178.446   | 0.818  |
| 2      | 8.540    | MM   | 0.320       | 136.992   | 0.628  |
| 3      | 9.742    | MM   | 0.435       | 21510.779 | 98.555 |

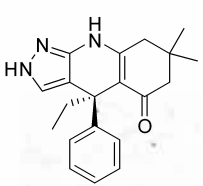

BRD0705

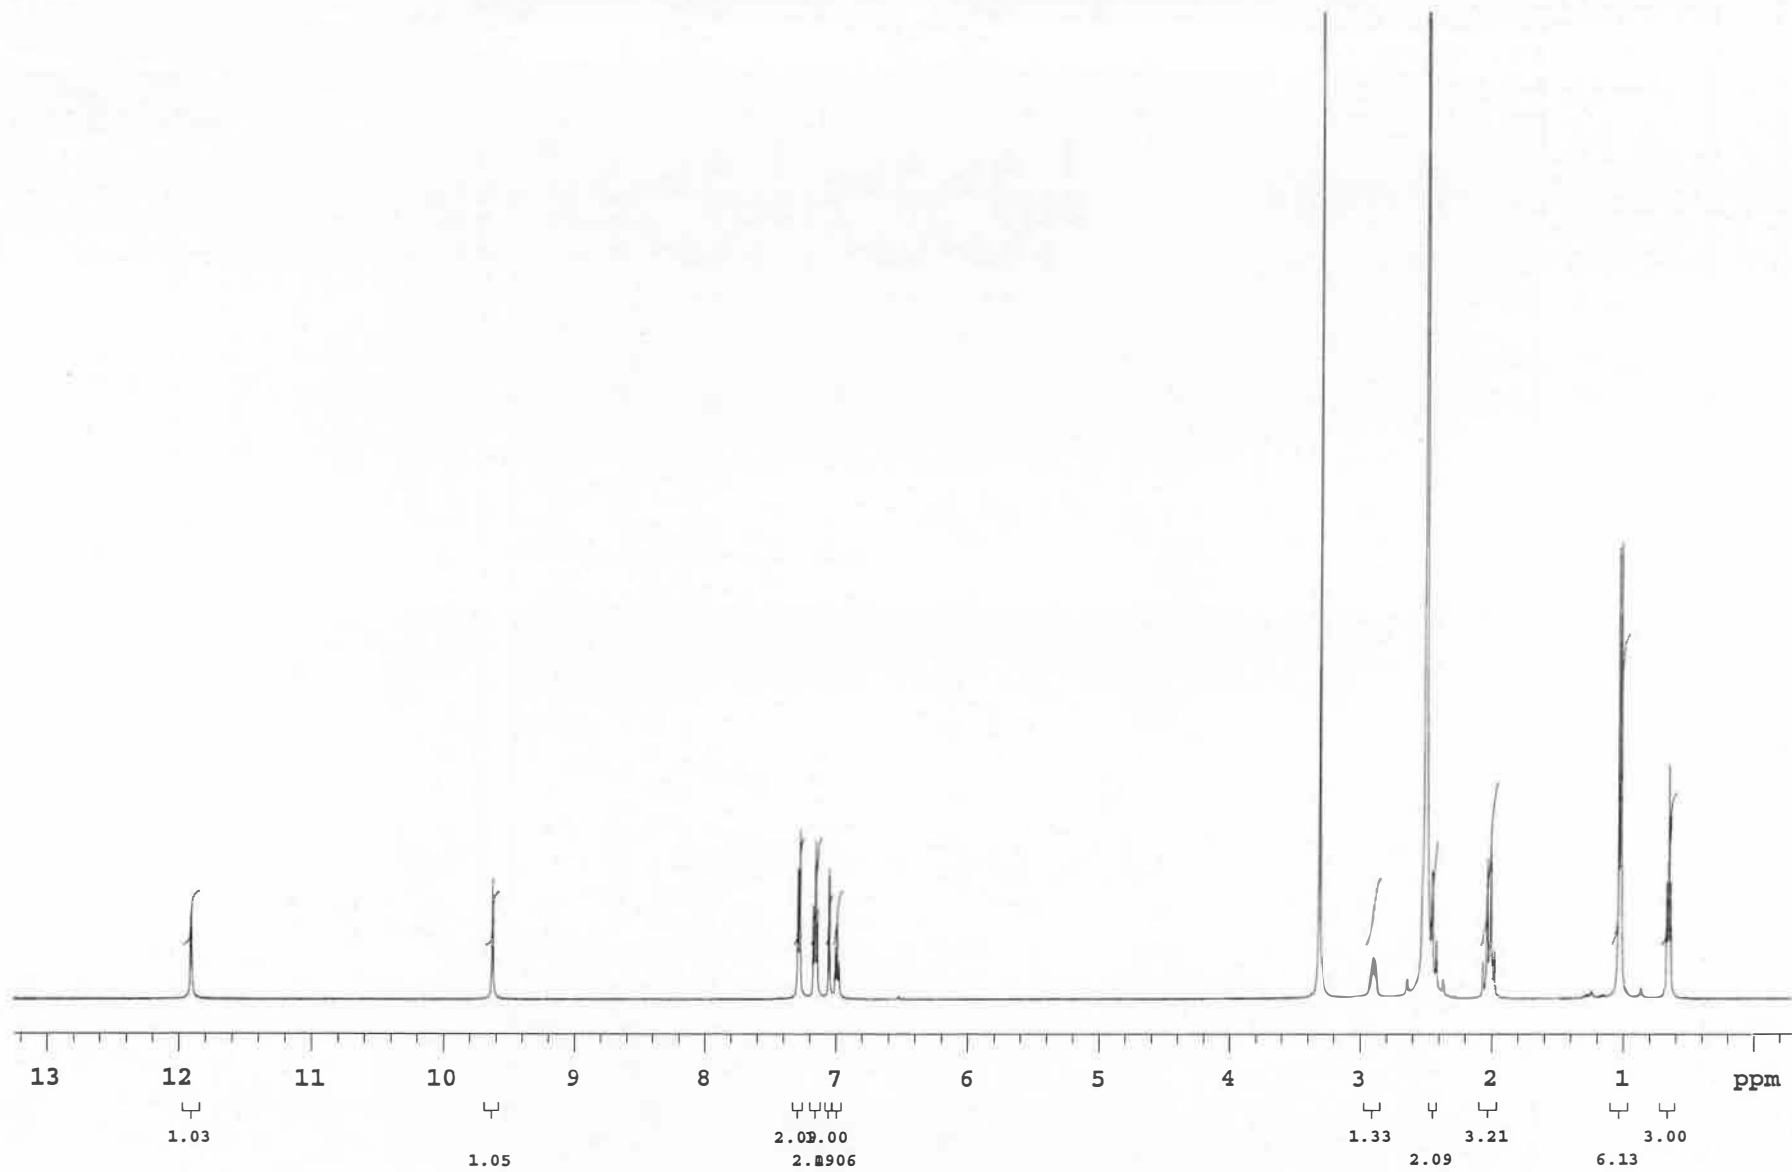

Sample Name: **SBF-MA1307-090-Fr-I # IP13100449**

Acquired By: System

Vial: 1:C,5

Acq. Method Set: PDA\_METH\_2A

Injection Volume: 1.00 ul

Proc. Chnl. Desc.: **PDA 210.0 nm**

Run Time: 6.0 Minutes

Date Acquired: 10/17/2013 3:31:21 PM IST

Project Name: SAPL\_UNIT-2\_AMCL\_ALC-13\_OCT-13

Column : Acquity BEH C-18 (50 x2.1mm,1.7 $\mu$ .)

Column Temp : 25°C

Mobile Phase A : Acetonitrile

Mobile Phase B : 0.025% TFA (Aq)

Flow Rate : 0.50 mL/Min

Time/% B : 0/90,0.5/90,3/10,6/10

Diluent : ACN:Water

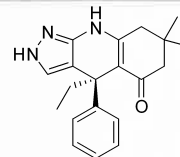

**BRD0705**

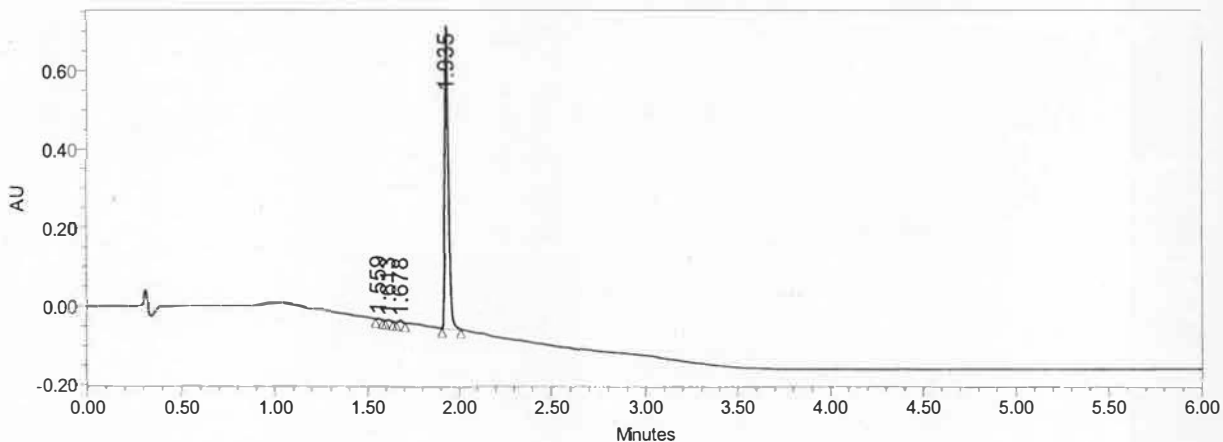

|   | RT   | Area    | % Area |
|---|------|---------|--------|
| 1 | 1.56 | 2411    | 0.22   |
| 2 | 1.61 | 3106    | 0.29   |
| 3 | 1.68 | 6801    | 0.63   |
| 4 | 1.93 | 1069142 | 98.86  |

Data file : C:\CHEM32\1\DATA\OCT-2013\171013D.D

Sample Name: SBF-MA1307-090Fr-I # IP13100448

Column: Chiralpak IC (250x4.6mm, 5µm),

Mobile Phase A : 0.1%DEA in n hexane

Mobile Phase B : DCM : MeOH(50:50)

A : B : 85 : 15

Flow : 1.0ml/min

Injection Date : Thu, 17. Oct. 2013                        Location :            Vial 65  
Sample Name : SBF-MA1307-090Fr-I #                        -> Inj. No. :            0  
Acq Operator : KSN                                               Inj. Vol. :            20 µl  
Acq. Method : C:\Chem32\1\DATA\SEPT-2013\290813 2013-09-20 18-31-0->  
Analysis Method : C:\Chem32\1\DATA\SEPT-2013\290813 2013-09-20 18-31-0->  
Last Changed : Thu, 17. Oct. 2013, 05:48:10 pm  
                     (modified after loading)

\*DAD1, Sig=326.00, 2.00 Ref=off, EXT of 171013D.D

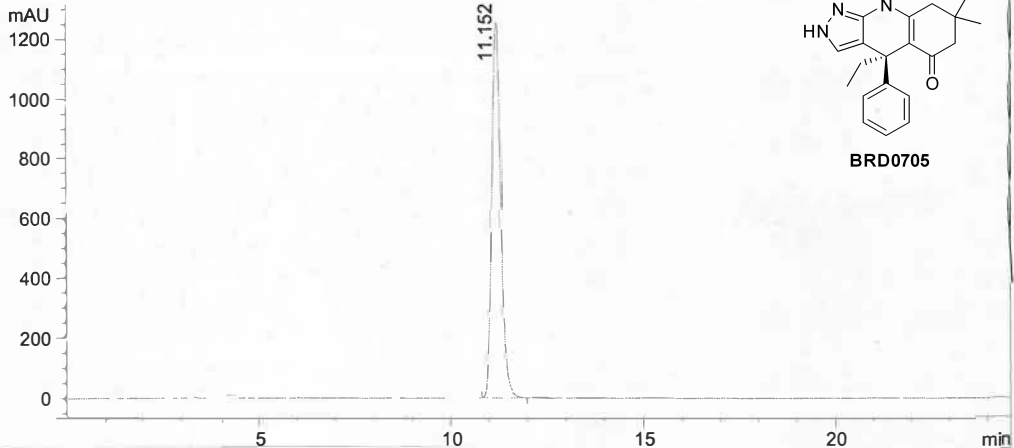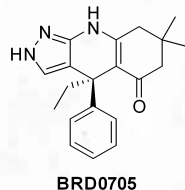

BRD0705

Signal 1: DAD1, Sig=326.00, 2.00 Ref=off, EXT

| Peak # | RT [min] | Type | Width [min] | Area      | Area %  |
|--------|----------|------|-------------|-----------|---------|
| 1      | 11.152   | MM   | 0.270       | 20390.010 | 100.000 |

Data file : C:\CHEM32\1\DATA\OCT-2013\171013F.D  
 Sample Name: SBF-MA1307-090 Fr-I & Fr-II Co.inj  
 Column: Chiralpak IC (250x4.6mm,5µm),  
 Mobile Phase A : 0.1%DEA n hexane  
 Mobile Phase B : DCM : MeOH(50:50)  
 A:B: 85 : 15  
 Flow : 1.0ml/min

Injection Date : Thu, 17. Oct. 2013 Location : Vial 67  
 Sample Name : SBF-MA1307-090 Fr-I & Fr--> Inj. No. : 0  
 Acy Operator : KSN Inj. Vol. : 25 µl  
 Acq. Method : C:\Chem32\1\DATA\SEPT-2013\290813 2013-09-20 18-31-0->  
 Analysis Method : C:\Chem32\1\DATA\SEPT-2013\290813 2013-09-20 18-31-0->  
 Last Changed : Fri, 18. Oct. 2013, 08:46:57 am  
 (modified after loading)

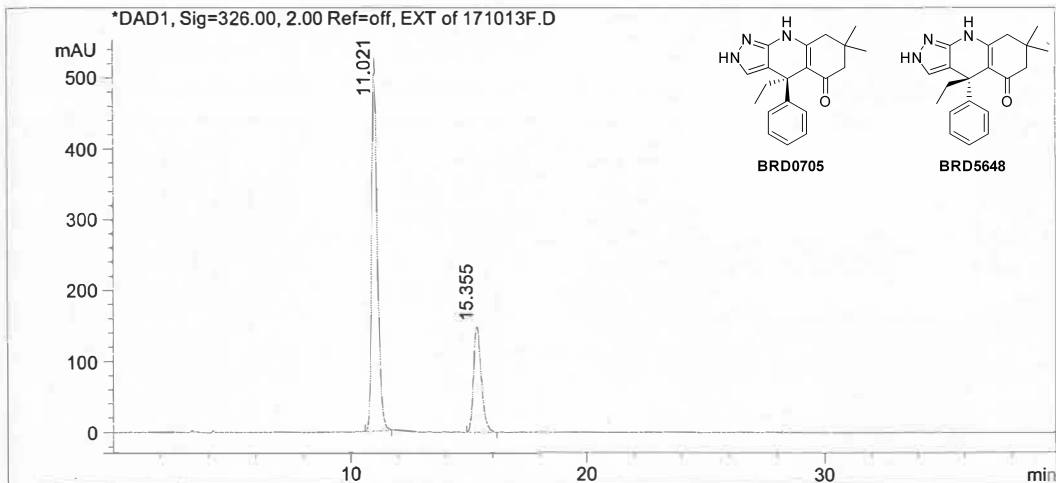

Signal 1: DAD1, Sig=326.00, 2.00 Ref=off, EXT

| Peak # | RT [min] | Type | Width [min] | Area     | Area % |
|--------|----------|------|-------------|----------|--------|
| 1      | 11.021   | MM   | 0.275       | 8697.430 | 71.838 |
| 2      | 15.355   | MM   | 0.381       | 3409.560 | 28.162 |

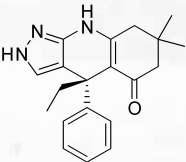

BRD5648

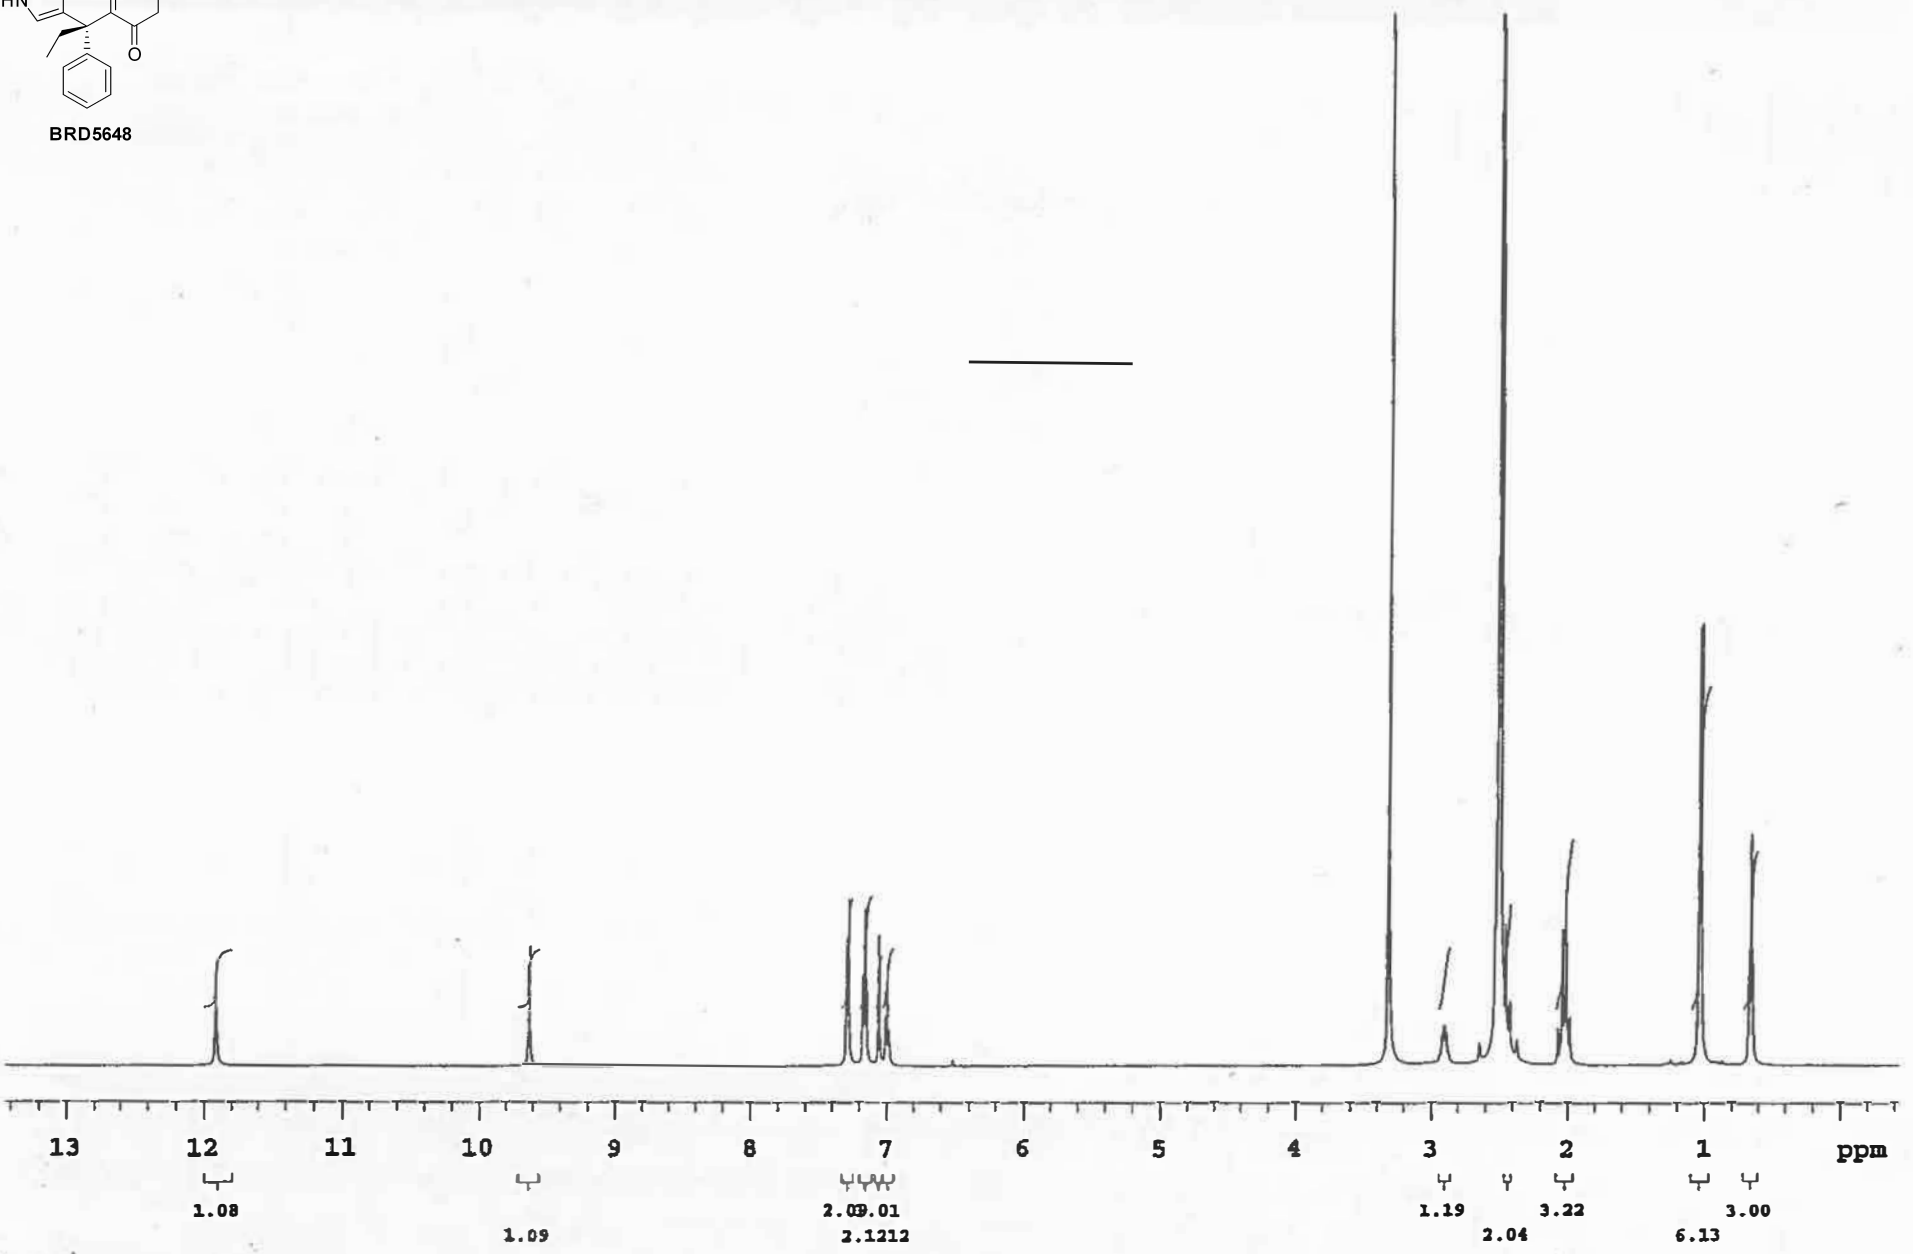

Sample Name: SBF-MA1307-090-Fr-II # IP13100452

Acquired By: System

Vial: 1:C,6

Acq. Method Set: PDA\_METH\_2A

Injection Volume: 1.00 ul

Proc. Chnl. Descr.: PDA 210.0 nm

Run Time: 6.0 Minutes

Date Acquired: 10/17/2013 3:40:17 PM IST

Project Name: SAPL\_UNIT-2\_AMCL\_ALC-13\_OCT-13

Column : Acquity BEH C-18 (50 x2.1mm,1.7μ<sub>m</sub>)

Column Temp : 25°C

Mobile Phase A : Acetonitrile

Mobile Phase B : 0.025% TFA (Aq)

Flow Rate : 0.50 mL/Min

Time/% B : 0/90,0.5/90,3/10,6/10

Diluent : ACN:Water

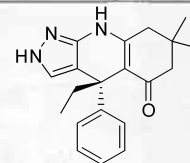

BRD5648

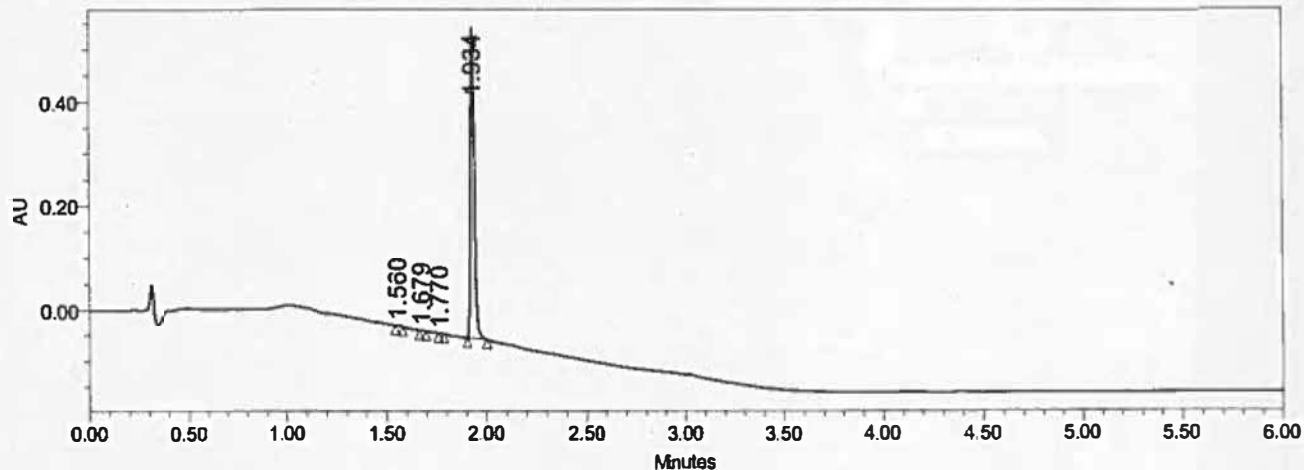

|   | RT   | Area   | % Area |
|---|------|--------|--------|
| 1 | 1.56 | 2317   | 0.28   |
| 2 | 1.68 | 1876   | 0.23   |
| 3 | 1.77 | 842    | 0.10   |
| 4 | 1.93 | 824634 | 99.39  |

Data file : C:\CHEM32\1\DATA\OCT-2013\171013D1.D  
 Sample Name: SBF-MA1307-090Fr-II # IP13100451  
 Column: Chiralpak IC (250x4.6mm, 5 $\mu$ m),  
 Mobile Phase A : 0.1%DEA in n hexane  
 Mobile Phase B : DCM : MeOH(50:50)  
 A::B: 85 : 15  
 Flow : 1.0ml/min

Injection Date : Thu, 17. Oct. 2013                      Location :            Vial 66  
 Sample Name : SBF-MA1307-090Fr-II #            ->    Inj. No. :            0  
 Acq Operator : KSN                                      Inj. Vol. :            20  $\mu$ l  
 Acq. Method : C:\Chem32\1\DATA\SEPT-2013\290813 2013-09-20 18-31-0->  
 Analysis Method : C:\Chem32\1\DATA\SEPT-2013\290813 2013-09-20 18-31-0->  
 Last Changed : Thu, 17. Oct. 2013, 05:51:18 pm  
 (modified after loading)

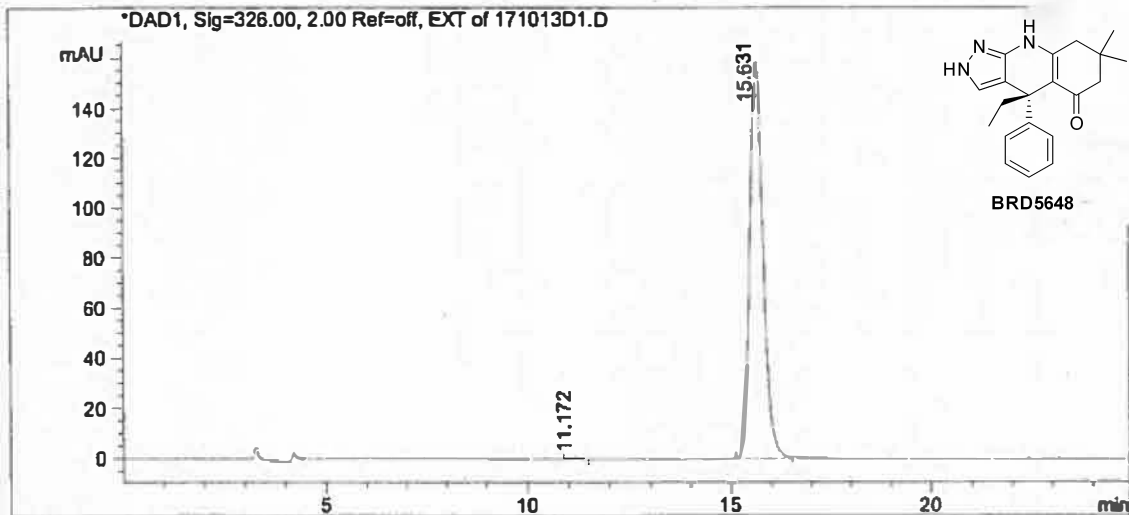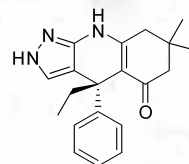

BRD5648

Signal 1: DAD1, Sig=326.00, 2.00 Ref=off, EXT

| Peak # | RT [min] | Type | Width [min] | Area     | Area % |
|--------|----------|------|-------------|----------|--------|
| 1      | 11.172   | MM   | 0.268       | 9.294    | 0.256  |
| 2      | 15.631   | MM   | 0.380       | 3619.157 | 99.744 |



## Supplementary Figures:

### Figure S1. GSK3 conservation across species

```
GSK3A HUMAN MSGGGPSGGGPGGSGRARTSSFAEPGGGGGGGGGGPSPGGSASGPGGTGGGKASVGAMGGGVGASSSSGGGPGSGGGGSSGGP 80
GSK3B HUMAN -----MSGRPRTTSFAE-----SCKPV 17
GSK3A RAT MSGGGPSGGGPGGSGRARTSSFAEPGGGGGGGGGGPSPGGSASGPGGTGGGKASVGAMGGGVGASSSSGGGPGSGGGGSSGGP 80
GSK3B RAT -----MSGRPRTTSFAE-----SCKPV 17
GSK3A MOUSE MSGGGPSGGGPGGSGRARTSSFAEPGGGGGGGGGGPSPGGSASGPGGTGGGKASVGAMGGGVGASSSSGGGPGSGGGGSSGGP 80
GSK3B MOUSE -----MSGRPRTTSFAE-----SCKPV 17

GSK3A HUMAN GAGTSFPPPGVKLGRDSGKVTTTVVATLGGQPERSQEVAYTDIKVIGNGSFGVVYQARLAETRELVAIKKVLQDKRFKNRE 160
GSK3B HUMAN QQPSAFGSMKVSRDKDGSKVTTTVVATPGQGPDRPQEVSYTDTKVIGNGSFGVVYQAKLCDSELVAIKKVLQDKRFKNRE 97
GSK3A RAT GAGTSFPPPGVKLGRDSGKVTTTVVATLGGQPERSQEVAYTDIKVIGNGSFGVVYQARLAETRELVAIKKVLQDKRFKNRE 160
GSK3B RAT QQPSAFGSMKVSRDKDGSKVTTTVVATPGQGPDRPQEVSYTDTKVIGNGSFGVVYQAKLCDSELVAIKKVLQDKRFKNRE 97
GSK3A MOUSE GAGTSFPPPGVKLGRDSGKVTTTVVATPGQGPERSQEVAYTDIKVIGNGSFGVVYQARLAETRELVAIKKVLQDKRFKNRE 160
GSK3B MOUSE QQPSAFGSMKVSRDKDGSKVTTTVVATPGQGPDRPQEVSYTDTKVIGNGSFGVVYQAKLCDSELVAIKKVLQDKRFKNRE 97
                                                                *      *      *      *

GSK3A HUMAN LQIMRKLDHCNIVRLRYFFYSSGEKKDELYLNLVLLDYVVPETVYRVARHFTKAKLTIPIIYKVYMYQLFRSLAYIHSQGV 240
GSK3B HUMAN LQIMRKLDHCNIVRLRYFFYSSGEKKDEVYLNLVLDYVVPETVYRVARHYSRAKQTLPVIYVKLYMYQLFRSLAYIHSFGI 177
GSK3A RAT LQIMRKLDHCNIVRLRYFFYSSGEKKDELYLNLVLLDYVVPETVYRVARHFTKAKLIPIIYKVYMYQLFRSLAYIHSQGV 240
GSK3B RAT LQIMRKLDHCNIVRLRYFFYSSGEKKDEVYLNLVLDYVVPETVYRVARHYSRAKQTLPVIYVKLYMYQLFRSLAYIHSFGI 177
GSK3A MOUSE LQIMRKLDHCNIVRLRYFFYSSGEKKDELYLNLVLLDYVVPETVYRVARHFTKAKLTIPIIYKVYMYQLFRSLAYIHSQGV 240
GSK3B MOUSE LQIMRKLDHCNIVRLRYFFYSSGEKKDEVYLNLVLDYVVPETVYRVARHYSRAKQTLPVIYVKLYMYQLFRSLAYIHSFGI 177
                                                                *      *      *      *      *      *      *

GSK3A HUMAN CHRDIKPNLLDPDTAVLKLCDFGSAKQLVRGEPNVSYICSRYRAPELIFGATDYTSSIDVWSAGCVLAELLLGQPIF 320
GSK3B HUMAN CHRDIKPNLLDPDTAVLKLCDFGSAKQLVRGEPNVSYICSRYRAPELIFGATDYTSSIDVWSAGCVLAELLLGQPIF 257
GSK3A RAT CHRDIKPNLLDPDTAVLKLCDFGSAKQLVRGEPNVSYICSRYRAPELIFGATDYTSSIDVWSAGCVLAELLLGQPIF 320
GSK3B RAT CHRDIKPNLLDPDTAVLKLCDFGSAKQLVRGEPNVSYICSRYRAPELIFGATDYTSSIDMWSAGCVLAELLLGQPIF 257
GSK3A MOUSE CHRDIKPNLLDPDTAVLKLCDFGSAKQLVRGEPNVSYICSRYRAPELIFGATDYTSSIDVWSAGCVLAELLLGQPIF 320
GSK3B MOUSE CHRDIKPNLLDPDTAVLKLCDFGSAKQLVRGEPNVSYICSRYRAPELIFGATDYTSSIDVWSAGCVLAELLLGQPIF 257
                                                                *      *      *      *      *      *      *

GSK3A HUMAN PGDSGVDQLVEIIKVLGTPTREQIREMNPNYTEFKFPQIKAHPWTKVFKS-RTPPEAIALCSSLLEYTPSSRLSPLEACA 399
GSK3B HUMAN PGDSGVDQLVEIIKVLGTPTREQIREMNPNYTEFKFPQIKAHPWTKVFRP-RTPPEAIALCSSLLEYTPARLTPLEACA 336
GSK3A RAT PGDSGVDQLVEIIKVLGTPTREQIREMNPNYTEFKFPQIKAHPWTKVFKS-RTPPEAIALCSSLLEYTPSSRLSPLEACA 399
GSK3B RAT PGDSGVDQLVEIIKVLGTPTREQIREMNPNYTEFKFPQIKAHPWTKVFRP-RTPPEAIALCSSLLEYTPARLTPLEACA 336
GSK3A MOUSE PGDSGVDQLVEIIKVLGTPTREQIREMNPNYTEFKFPQIKAHPWTKVFKSSKTPPEAIALCSSLLEYTPSSRLSPLEACA 400
GSK3B MOUSE PGDSGVDQLVEIIKVLGTPTREQIREMNPNYTEFKFPQIKAHPWTKVFRP-RTPPEAIALCSSLLEYTPARLTPLEACA 336

GSK3A HUMAN HSFFDELRCLGTQLPNNRLPLPLFNFSAGELSIQPSLNAILIPHLRSPAGTTTL-----TPSSQALTETPTSSDWQSTD 474
GSK3B HUMAN HSFFDELRDPNVKLPNGRDTPALFNFTTQELSSNPLATILIPHARIQAAASTPTNATAAS-----DANTGDRGQTNN 410
GSK3A RAT HSFFDELRSLGTQLPNNRLPLPLFNFSPGELSIQPSLNAILIPHLRSPGPATL-----TSSQALTETQTGDWQAPD 474
GSK3B RAT HSFFDELRDPNVKLPNGRDTPALFNFTTQELSSNPLATILIPHARIQAAASPPANATAAS-----DTNAGDRGQTNN 410
GSK3A MOUSE HSFFDELRRLGAQLPNDRPLPLFNFSPGELSIQPSLNAILIPHLRSPAGPASPLTTSYNPSSQALTEAQTGDWQPSD 480
GSK3B MOUSE HSFFDELRDPNVKLPNGRDTPALFNFTTQELSSNPLATILIPHARIQAAASPPANATAAS-----DTNAGDRGQTNN 410

GSK3A HUMAN ATPTLTNS- 483
GSK3B HUMAN AASASANST 420
GSK3A RAT ATPTLTNS- 483
GSK3B RAT AASASANST 420
GSK3A MOUSE ATTATLSSS 490
GSK3B MOUSE AASASANST 420
```

#### Legend

GSK3A HUMAN P49840  
GSK3B HUMAN P49841  
GSK3A RAT P18265  
GSK3B RAT P18266  
GSK3A MOUSE Q2NL51  
GSK3B MOUSE Q9WV60

## Figure S2. X-ray crystal structure of GSK3 from *Ustilago Maydis*.

Image generated from PDB 4E7W. Numbering is based on the Uniprot wild-type sequence ID Q4PH53. The hinge glutamic acid (Glu126) adopts in the fungal structure a downward conformation also observed in our MD calculations.

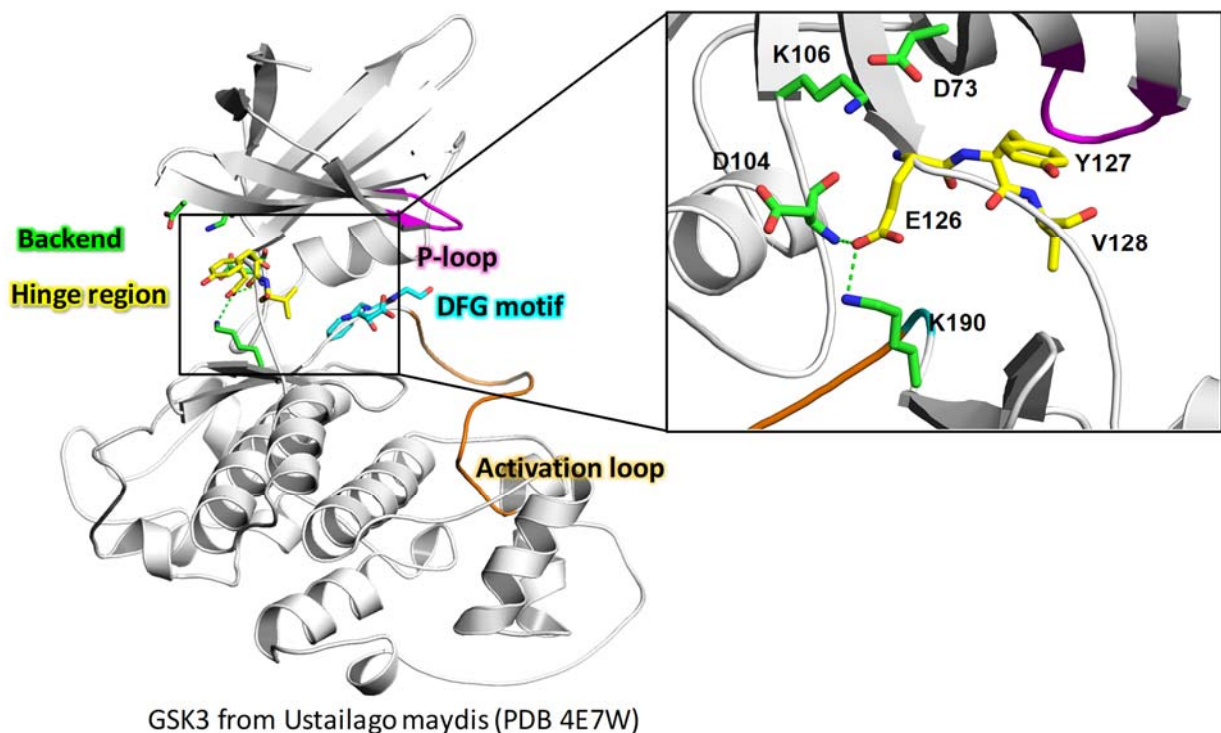

### Reference:

Grutter, C., Simard, J. R., Mayer-Wrangowski, S. C., Schreier, P. H., Perez-Martin, J., Richters, A., Getlik, M., Gutbrod, O., Braun, C. A., Beck, M. E., and Rauh, D. (2012) Targeting GSK3 from *Ustilago maydis*: type-II kinase inhibitors as potential antifungals, *ACS Chem Biol* 7, 1257-1267.

Figure S3. Schematic of back end interactions depicting distance A between Glu196/Asp133 and Arg176/Arg113 and distance B between Arg176/Arg113 and Glu143/Glu80 for GSK3A and GSK3B respectively.

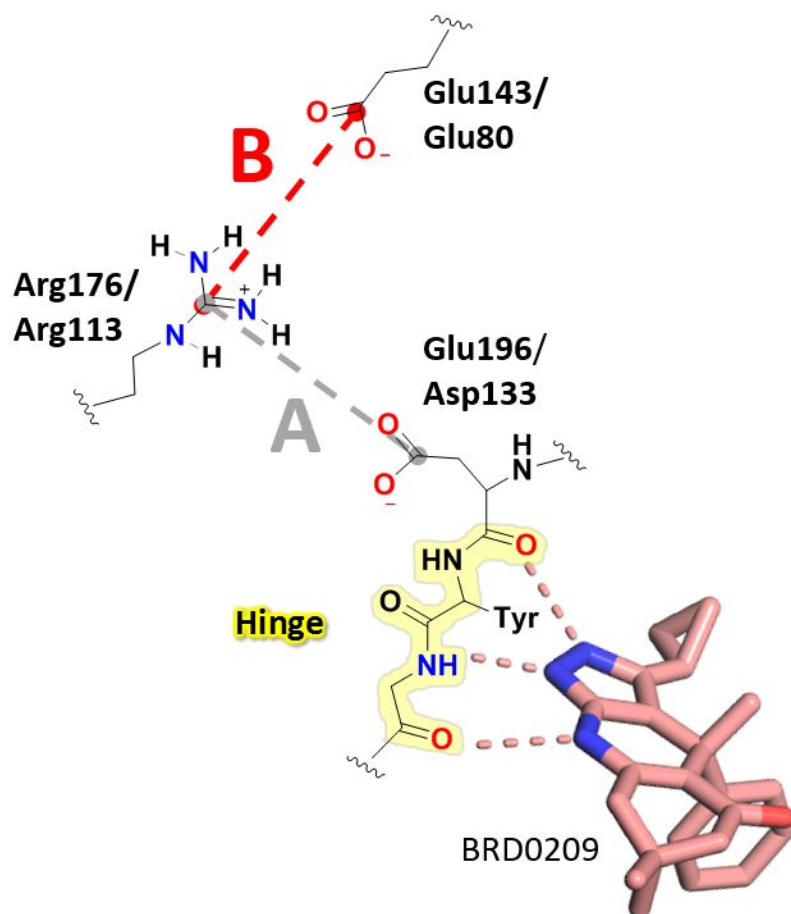

## Figure S4. Hinge backend interaction measurements and energy plots

Distance vs Time plot: Supplemental figure S4 A and C.

Initial visual observations of the molecular dynamics simulations suggested that the backend hydrogen bond network behaves differently between the apo-GSK3 $\alpha$  and apo-GSK3 $\beta$  simulations. To quantify this observation, two distances were measured using the Simulation Event Analysis program in Desmond version 4.7 (Desmond Molecular Dynamics System, version 4.7, D. E. Shaw Research, New York, NY, 2016. Maestro-Desmond Interoperability Tools, version 4.7, Schrödinger, New York, NY, 2016.) for GSK3 $\alpha$  these two distances are distance A (Glu196 atom CD to Arg176 atom CZ, Figure S3) and distance B (Arg176 atom CZ to Glu143 atom CD) and for GSK3 $\beta$  these two distances are distance A (Asp133@ atom CG to Arg113 atom CZ) and distance B (Arg113 atom CZ to Glu80 atom CD). These measurements were plotted across time (nanoseconds), in addition, the running average was calculated in Origin 2015 (OriginLab, Northampton, MA) using 201 data points (100 data points before, 100 data points after and the data point selected).

Free energy profiles: Supplemental figure S4 B and D.

The *hist* program in CPPTRAJ from AmberTools16 was employed to estimate the free energy profiles across the two sets of simulations with respect to the two distance measurements described in Figure S3 and Figure 1C panels 1-2 (Roe, 2013 and Case, 2016). The boundary conditions for the calculation were set with a minimum of 2 Å and a maximum of 14 Å. 96 bins were selected for the calculation. A temperature of 300K was defined as the simulation temperature.

### References:

Daniel R. Roe and Thomas E. Cheatham, III, "PTRAJ and CPPTRAJ: Software for Processing and Analysis of Molecular Dynamics Trajectory Data". J. Chem. Theory Comput., 2013, 9 (7), pp 3084-3095.

D.A. Case, R.M. Betz, D.S. Cerutti, T.E. Cheatham, III, T.A. Darden, R.E. Duke, T.J. Giese, H. Gohlke, A.W. Goetz, N. Homeyer, S. Izadi, P. Janowski, J. Kaus, A. Kovalenko, T.S. Lee, S. LeGrand, P. Li, C. Lin, T. Luchko, R. Luo, B. Madej, D. Mermelstein, K.M. Merz, G. Monard, H. Nguyen, H.T. Nguyen, I. Omelyan, A. Onufriev, D.R. Roe, A. Roitberg, C. Sagui, C.L. Simmerling, W.M. Botello-Smith, J. Swails, R.C. Walker, J. Wang, R.M. Wolf, X. Wu, L. Xiao and P.A. Kollman (2016), AMBER 2016, University of California, San Francisco.

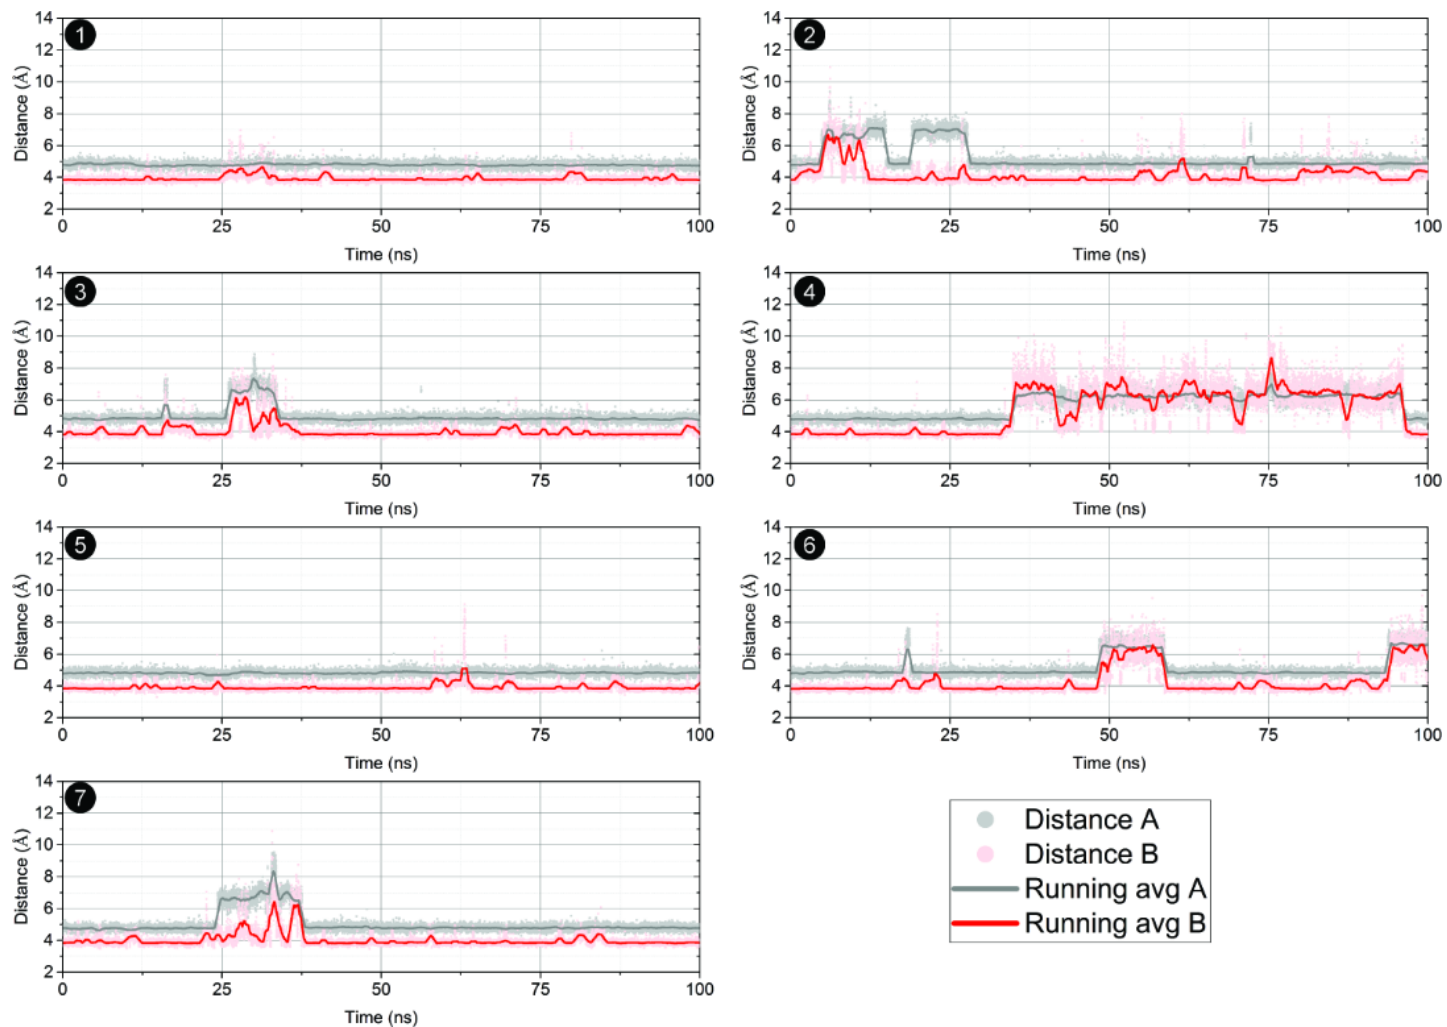

A. Apo GSK3B simulation: Back end distances measured across time. Solid lines represent running average.

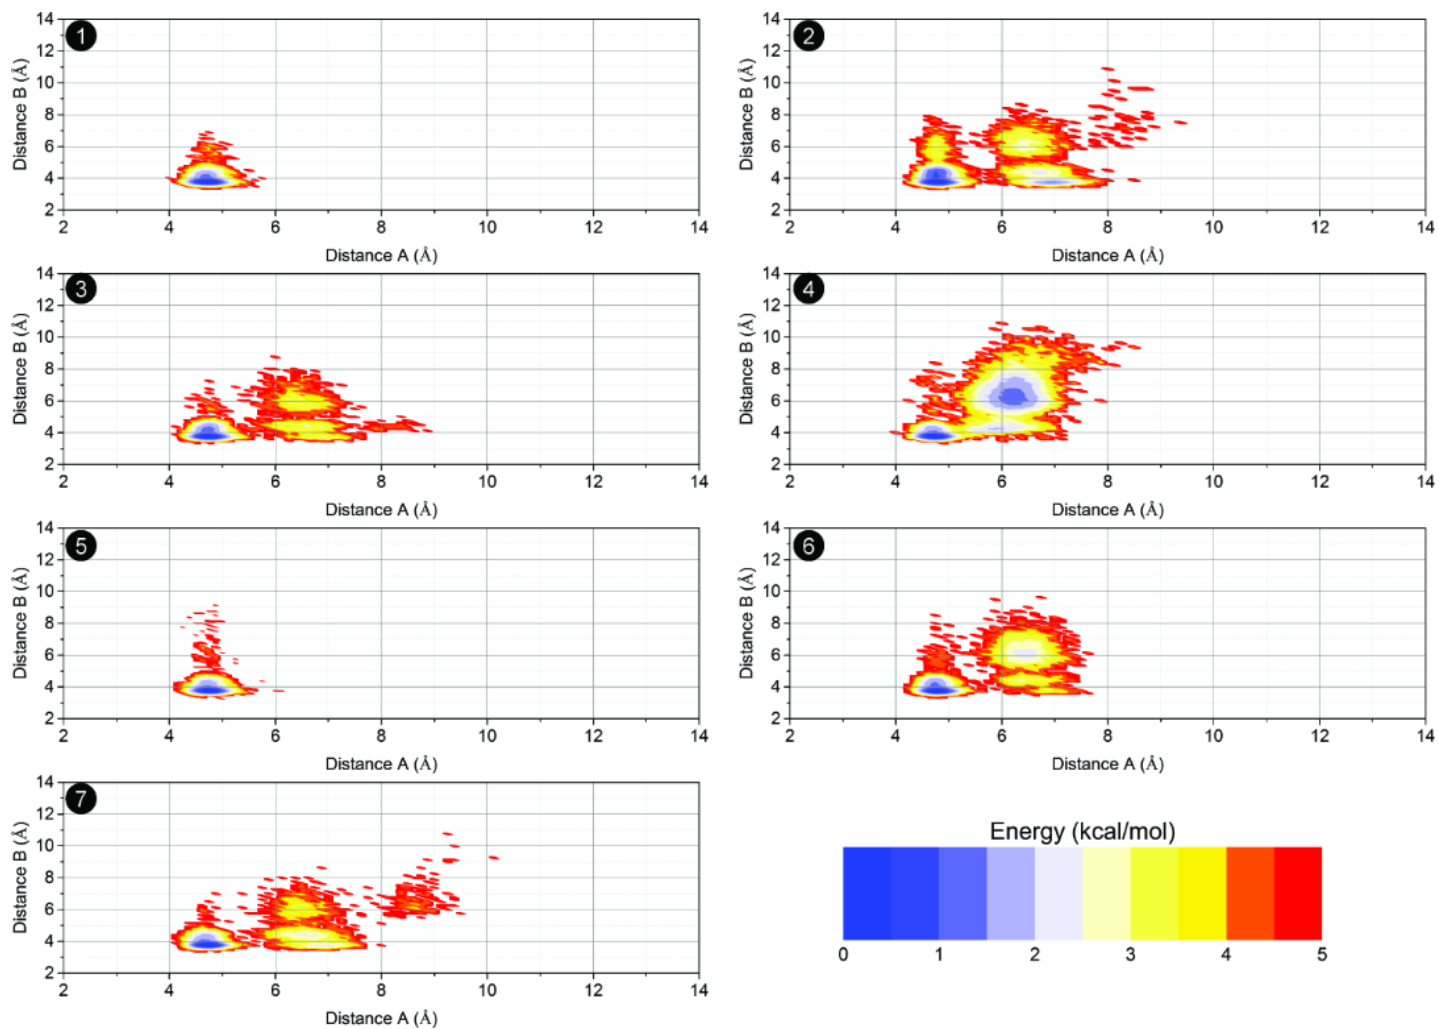

B. Free energy plots in kcal/mol based on distances A and B of back end interactions for apo GSK3B. Blue represents low energy wells, red represents high energy regions.

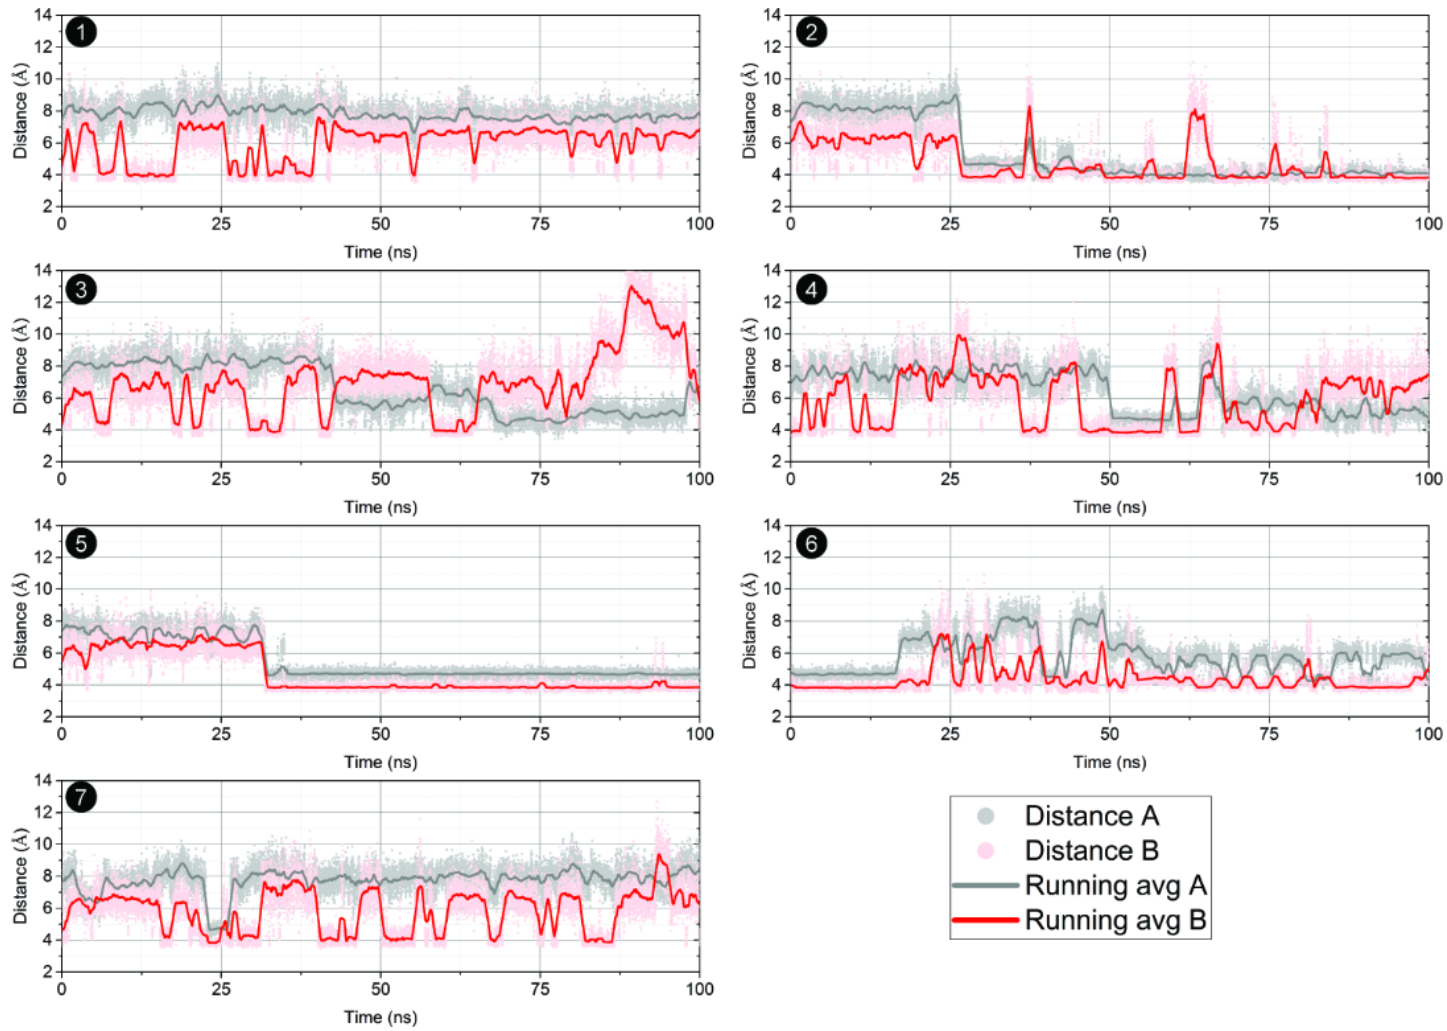

C. Apo GSK3A simulation: Back end distances measured across time. Solid lines represent running average of 200 data points.



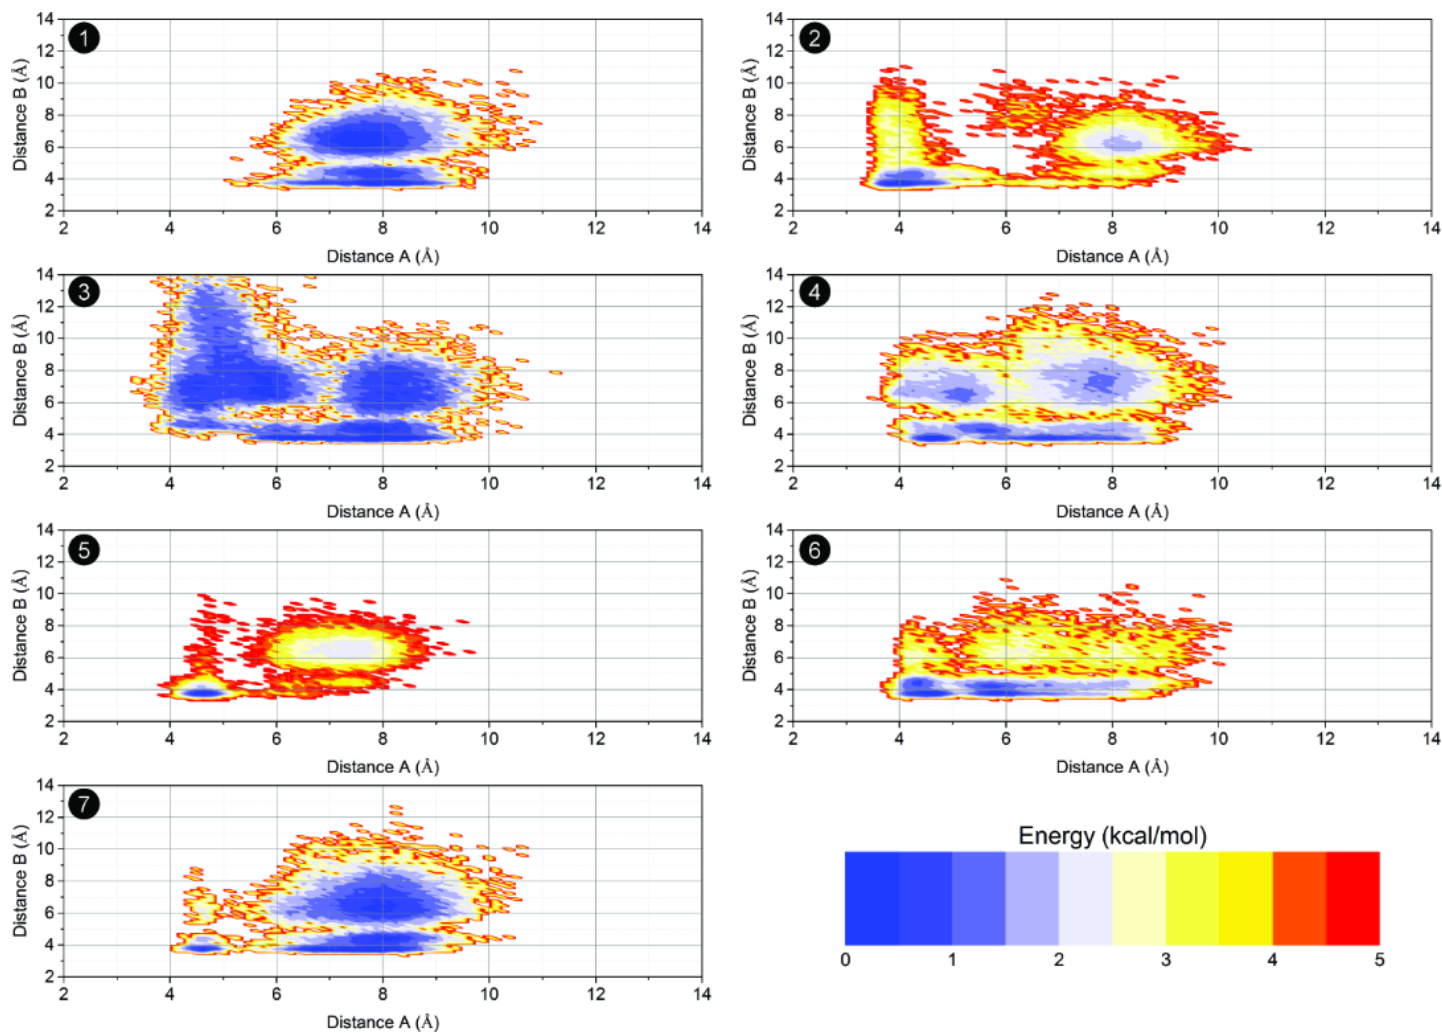

D. Free energy plots in kcal/mol based on distances A and B of back end interactions for apo GSK3A. Blue represents low energy wells, red represents high energy regions.



**Figure S5. X-ray crystal structures of *h*GSK3B bound to BRD3731 (panels 1-3) and BRD0705 (panels 4-6) and *h*GSK3B(D133E) bound to BRD0705 (panels 7-9).**

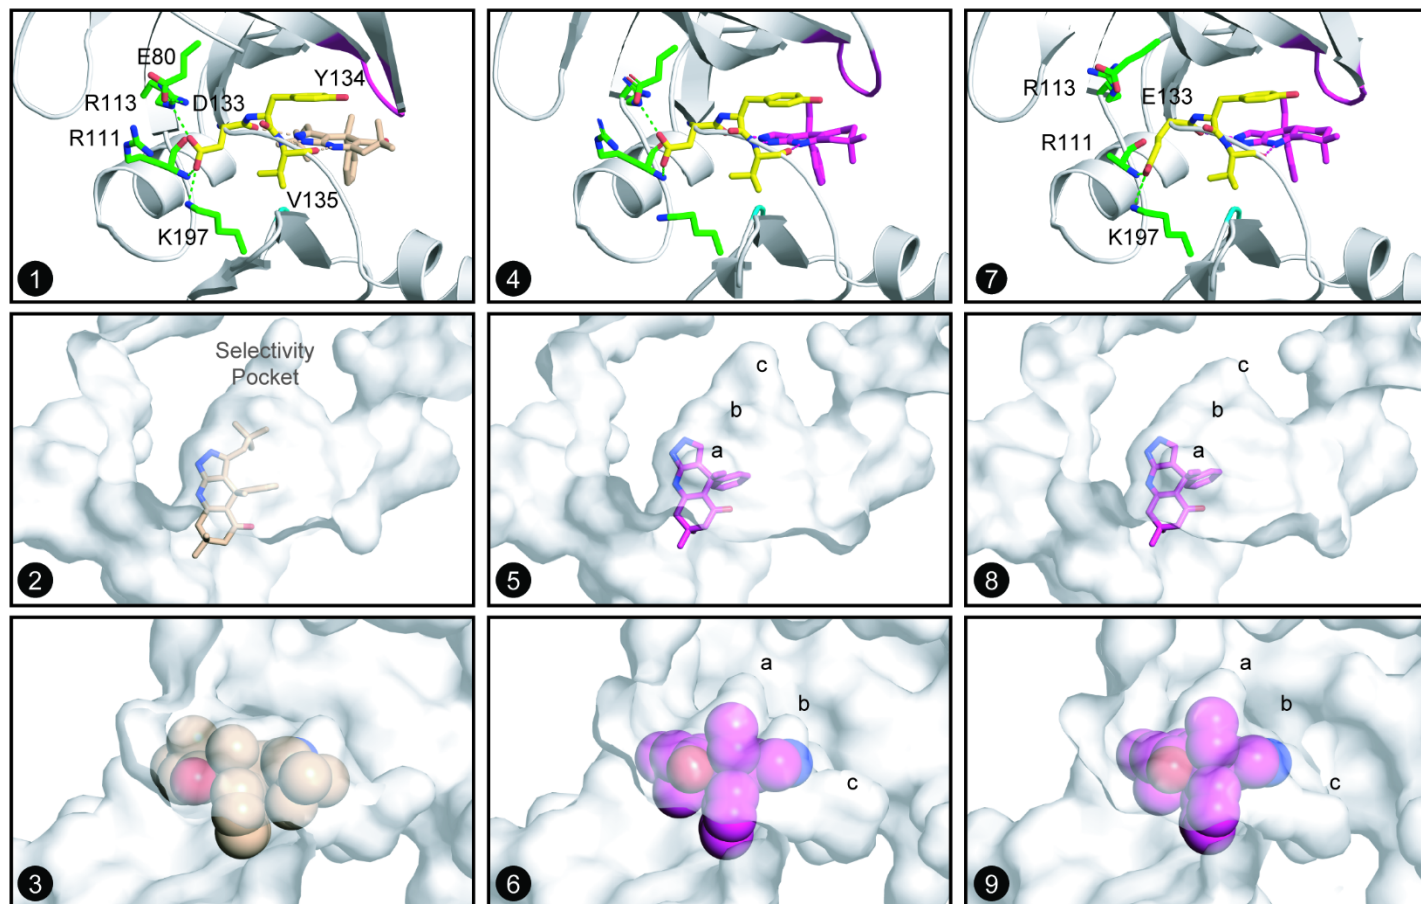

**Figure S6. Live cell target engagement analysis for GSK3 $\alpha$  and GSK3 $\beta$  using NanoBRET (Promega).**

Engagement to NanoLuc-GSK3A and NanoLuc-GSK3B were analyzed in live HEK293 cells, following 2 h of equilibration with 100 nM NanoBRET Kinase Tracer 6. Graphs show representative data from an individual experiment (mean  $\pm$  S.D. of four data points).

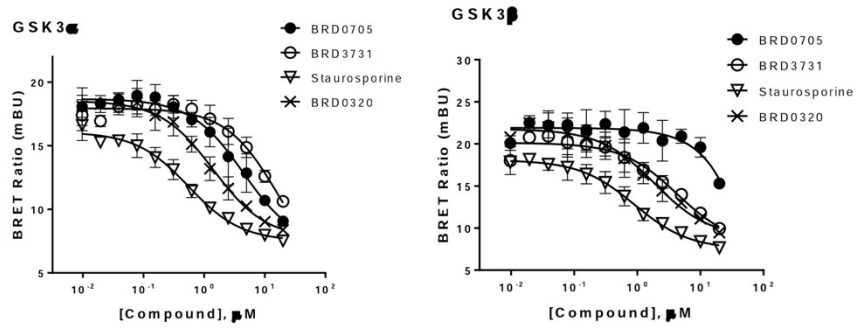

**Figure S7. (A) PAS staining and (B) quantitative dosage of glycogen synthase after BRD0705 treatment.**

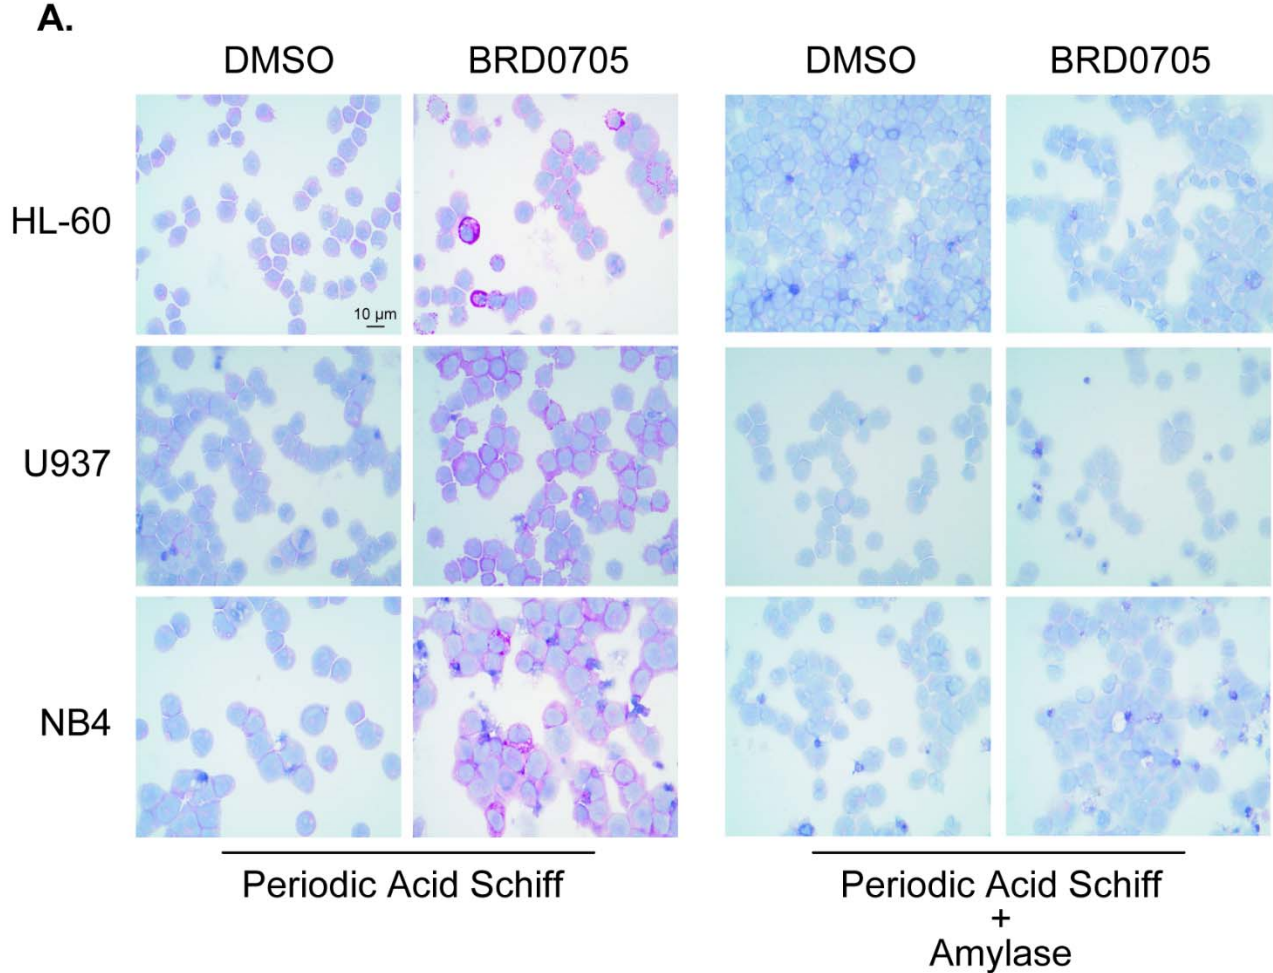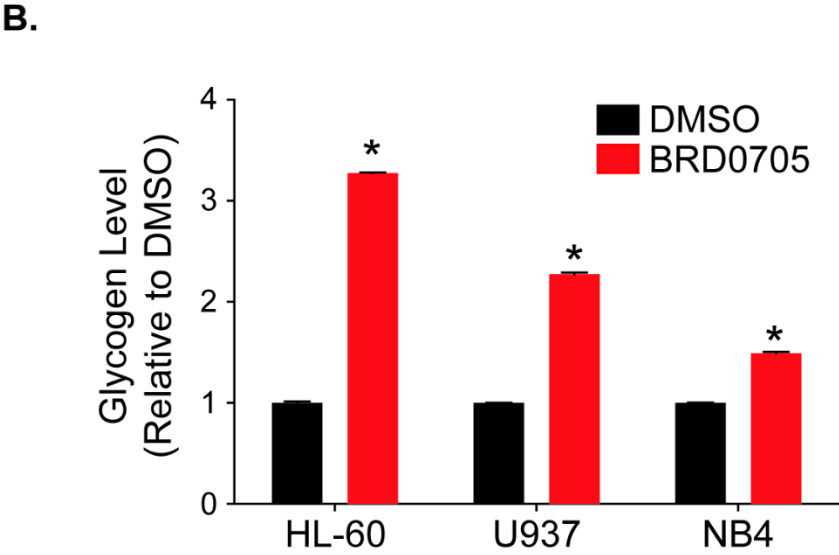

**Figure S8. BRD3731 induces heterogeneous effects on differentiation and colony formation in AML cell lines.**

(a-c) FACS analysis of the expression of CD11b, CD14, and CD11c cell surface markers in the indicated AML cell lines treated with BRD0705 for 6 days. \* p value < 0.05 is calculated using a Welch's t test in comparison with the control condition. Error bars represent mean  $\pm$  SEM of three biological replicates. (d) Colony formation assay of the indicated AML cell lines after BRD3731 pretreatment. Data are represented as mean  $\pm$  SEM of 3 replicates.

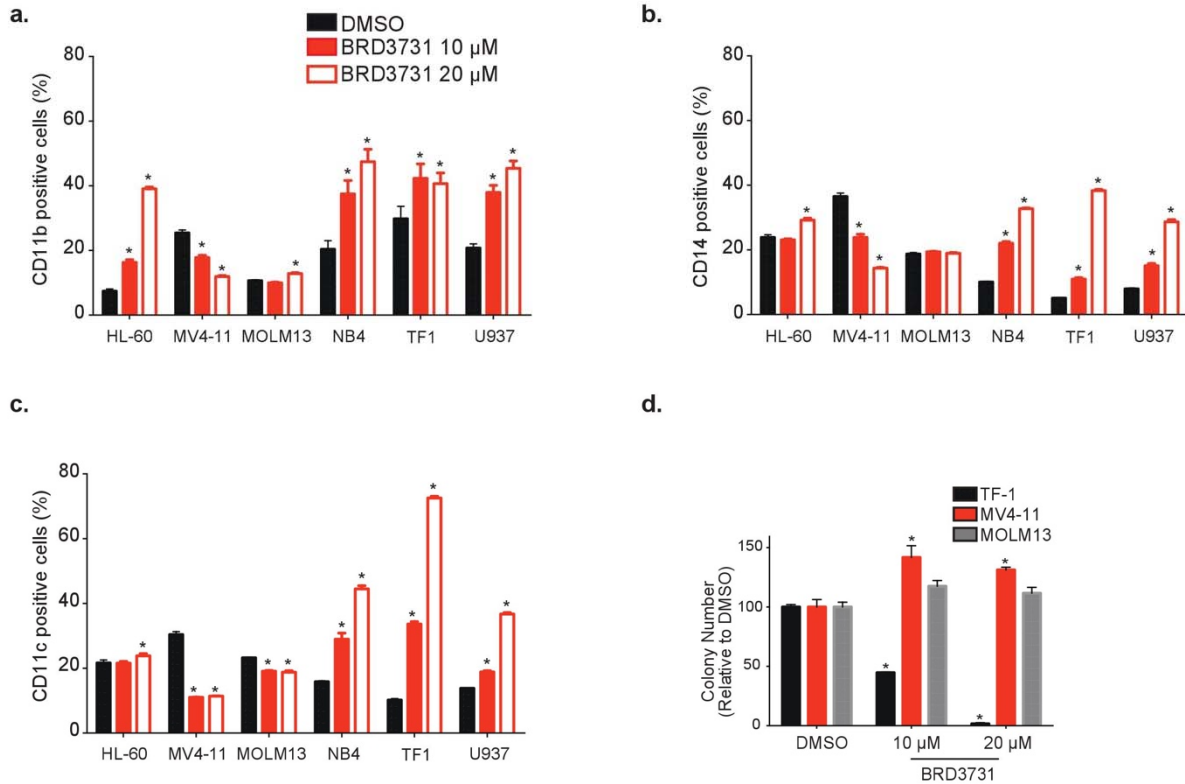

## Figure S9. BRD0705 triggers differentiation, impairs stemness and mitochondria transcriptional programs.

BRD0705's signature identified by RNAseq was then interrogated in a functional enrichment analysis across the MsigDB database. (a) Functional transcriptional network upon BRD0705 treatment. Gene sets altered in the BRD0705 signature were obtained through quantitative comparison by GSEA of the c2 collection of gene sets. GSEA plots for the GSK3 inhibitor (CHIR99021) (b), targets of NUP98 HOXA9 fusion (c), HSC versus MONO (d) and MOOHA\_mitochondria signatures (e) are shown as significantly modulated representative gene sets of GSK3 inhibition, stemness inhibition, induced differentiation and mitochondria upregulation pathways respectively in response to BRD0705 treatment.

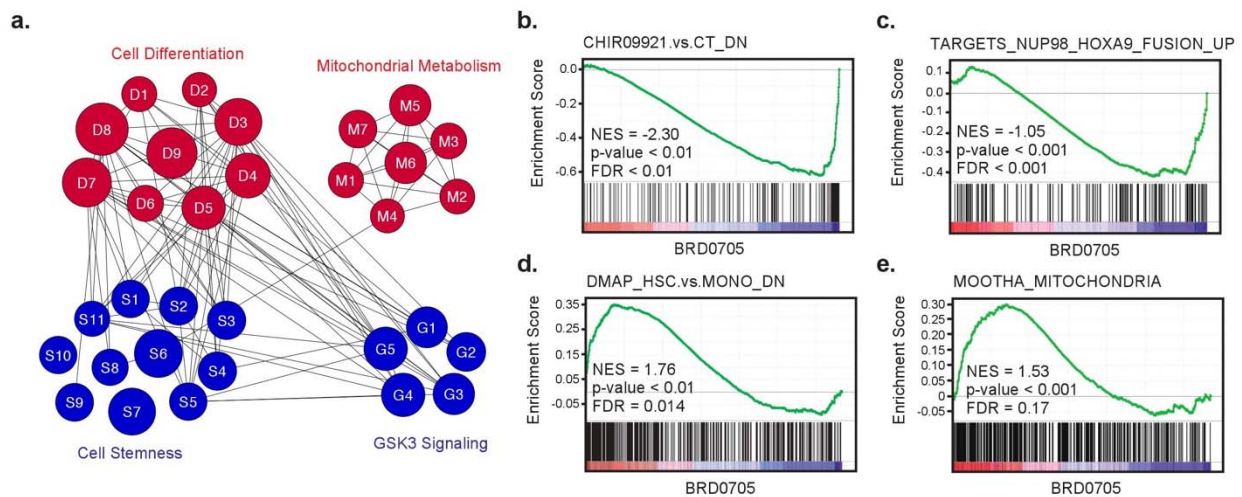

**Figure S10. Pharmacokinetic, pharmacodynamic and tolerability properties of BRD0705.**

(a) Pharmacokinetics time-concentration curve and corresponding pharmacokinetic parameters for BRD0705 (30 mg/kg) following a single oral dose in male C57BL/6 mice. (b) Circulating CD45+ cells measured by FACS at 2 weeks of treatment. (c-f) Complete blood counts were measured after 5 days of treatment with BRD0705 at 15 and 30 mg/kg. (g) Weight was measured daily. (h) Glycogen level was measured in peripheral blood mononuclear cells (PBMC) after 16 days of treatment with BRD0705 at 15 and 30 mg/kg as a biomarker of target engagement. Data are represented as mean  $\pm$  SEM. \* p value < 0.05 is calculated using a Mann-Whitney test in comparison with control conditions.

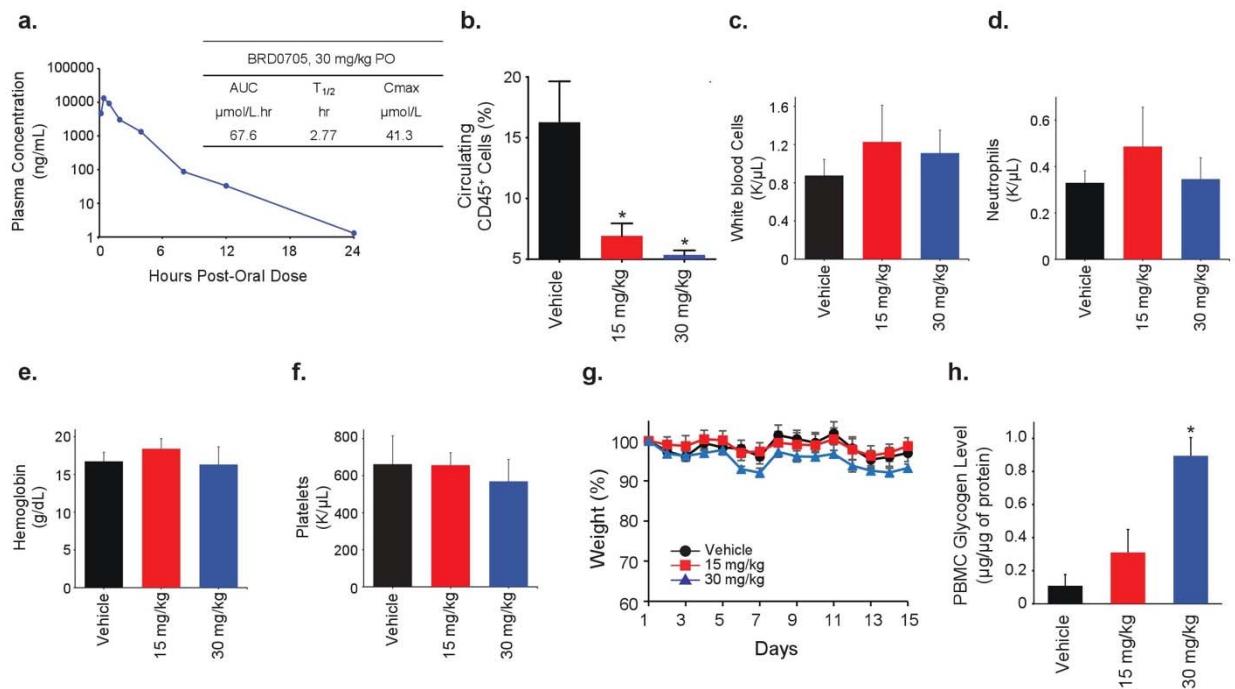

## Supplementary Tables:

**Table S5. Kinome selectivity for BRD0320 and BRD5648 (Carna biosciences, JP)**

| Kinase                                 | % Inhibition          |                             | Fold selectivity | Kinase             | % Inhibition          |                             |
|----------------------------------------|-----------------------|-----------------------------|------------------|--------------------|-----------------------|-----------------------------|
|                                        | BRD0320<br>10 $\mu$ M | IC <sub>50</sub> ( $\mu$ M) |                  |                    | BRD5648<br>10 $\mu$ M | IC <sub>50</sub> ( $\mu$ M) |
| GSK3 $\beta$                           | 102.9                 | 0.024                       |                  | CK1 $\delta$       | 94.7                  | 0.638                       |
| GSK3 $\alpha$                          | 102.5                 | 0.022                       |                  | GSK3 $\alpha$      | 86.2                  | 1.35                        |
| CDK3/CycE1                             | 87.2                  | 1.11                        | 46               | PDHK4              | 85.8                  | 2.08                        |
| CDK5/p25                               | 86.6                  | 1.81                        | 75               | CK1 $\epsilon$     | 82.3                  | 2.23                        |
| CDK2/CycE1                             | 85.6                  | 1.43                        | 60               | CK1 $\alpha$       | 59.6                  | 6.50                        |
| CDK2/CycA2                             | 85.5                  | 2.56                        | 107              | TSSK3              | 57.3                  | >50                         |
| CDK6/CycD3                             | 51.9                  | 5.16                        | 215              | p70S6K $\beta$     | 56.5                  | 9.19                        |
| CDC2/CycB1                             | 49.4                  |                             |                  | p70S6K             | 53.6                  | 9.17                        |
| CDK4/CycD3                             | 40.5                  |                             |                  | GSK3 $\beta$       | 52.4                  | 8.27                        |
| CDK7/CycH/MAT1                         | 37.4                  |                             |                  | PDHK2              | 44.2                  |                             |
| CDK9/CycT1                             | 34.8                  |                             |                  | IKK $\beta$        | 40.7                  |                             |
| PAK2                                   | 25.6                  |                             |                  | COT_Cascade        | 39.4                  |                             |
| AurB                                   | 18.9                  |                             |                  | CDK6/CycD3         | 37.8                  |                             |
| DYRK1B                                 | 12.2                  |                             |                  | TNIK               | 37.3                  |                             |
| PLK2                                   | 9.0                   |                             |                  | PAK2               | 37.2                  |                             |
| JNK2                                   | 8.3                   |                             |                  | DDR1               | 35.8                  |                             |
| FLT3                                   | 8.2                   |                             |                  | PIK3CA/PIK3R1      | 35.6                  |                             |
| CK1 $\alpha$                           | 7.8                   |                             |                  | MOS_Cascade        | 34.0                  |                             |
| AMPK $\alpha$ 1/ $\beta$ 1/ $\gamma$ 1 | 5.9                   |                             |                  | MAP3K1_Cascade     | 32.3                  |                             |
| Erk2                                   | 5.7                   |                             |                  | PKD3               | 28.9                  |                             |
| PIM2                                   | 4.3                   |                             |                  | RAF1_Cascade       | 28.4                  |                             |
| PKAC $\alpha$                          | 3.7                   |                             |                  | MELK               | 28.0                  |                             |
| AurA                                   | 3.7                   |                             |                  | CHK2               | 27.4                  |                             |
| MST1                                   | 3.7                   |                             |                  | LCK                | 26.9                  |                             |
| BRSK2                                  | 3.5                   |                             |                  | HGK                | 26.9                  |                             |
| NEK1                                   | 3.5                   |                             |                  | PIM3               | 26.4                  |                             |
| CLK1                                   | 3.1                   |                             |                  | BRAF(V600E)_Cascad | 24.4                  |                             |
| PIM1                                   | 3.1                   |                             |                  | CK1 $\gamma$ 2     | 23.1                  |                             |
| CK1 $\epsilon$                         | 2.9                   |                             |                  | CaMK1 $\delta$     | 22.5                  |                             |
| NEK9                                   | 2.3                   |                             |                  | CDK3/CycE1         | 22.0                  |                             |
| LTK                                    | 2.2                   |                             |                  | DLK_Cascade        | 21.7                  |                             |
| MARK3                                  | 2.1                   |                             |                  | SPHK2              | 20.8                  |                             |
| NEK2                                   | 1.5                   |                             |                  | DDR2               | 20.6                  |                             |
| RSK1                                   | 1.3                   |                             |                  | FMS                | 20.6                  |                             |
| PBK                                    | 1.1                   |                             |                  | PKD1               | 19.7                  |                             |
| p38 $\alpha$                           | 0.8                   |                             |                  | PIM1               | 19.7                  |                             |
| CK1 $\gamma$ 3                         | 0.8                   |                             |                  | TYK2               | 19.4                  |                             |
| PKC $\alpha$                           | -0.1                  |                             |                  | PLK2               | 19.2                  |                             |
| TRKA                                   | -0.5                  |                             |                  | MAP2K1_Cascade     | 18.1                  |                             |
| ROCK1                                  | -1.1                  |                             |                  | HER2               | 17.7                  |                             |
| AurC                                   | -1.5                  |                             |                  | CaMK4              | 17.3                  |                             |
| ROS                                    | -1.5                  |                             |                  | CK1 $\gamma$ 1     | 17.1                  |                             |
| CK2 $\alpha$ 2/ $\beta$                | -1.8                  |                             |                  | MAP3K4_Cascade     | 16.7                  |                             |
| HGK                                    | -2.0                  |                             |                  | PHKG1              | 16.5                  |                             |
| p70S6K                                 | -2.1                  |                             |                  | KIT(V560G)         | 16.5                  |                             |
| CaMK4                                  | -2.4                  |                             |                  | BRAF_Cascade       | 16.2                  |                             |
| PDK1                                   | -2.6                  |                             |                  | PLK3               | 15.8                  |                             |
| NEK6                                   | -3.0                  |                             |                  | HIPK4              | 15.4                  |                             |
| CHK1                                   | -3.0                  |                             |                  | AurB               | 15.1                  |                             |

| Kinase                  | % Inhibition<br>BRD0320<br>10 $\mu$ M | IC <sub>50</sub> ( $\mu$ M) | Fold<br>selectivity | Kinase         | % Inhibition<br>BRD5648<br>10 $\mu$ M | IC <sub>50</sub> ( $\mu$ M) |
|-------------------------|---------------------------------------|-----------------------------|---------------------|----------------|---------------------------------------|-----------------------------|
| IRAK4                   | -3.1                                  |                             |                     | skMLCK         | 15.1                                  |                             |
| IKK $\beta$             | -3.2                                  |                             |                     | EPHA6          | 15.0                                  |                             |
| NEK7                    | -3.6                                  |                             |                     | MSK2           | 14.8                                  |                             |
| AKT1                    | -4.4                                  |                             |                     | CLK2           | 14.5                                  |                             |
| SGK                     | -4.5                                  |                             |                     | PASK           | 12.9                                  |                             |
| CHK2                    | -4.7                                  |                             |                     | CLK3           | 12.8                                  |                             |
| TSSK1                   | -4.8                                  |                             |                     | PKN1           | 12.4                                  |                             |
| CK2 $\alpha$ 1/ $\beta$ | -4.8                                  |                             |                     | AurA           | 12.3                                  |                             |
| PKD2                    | -6.0                                  |                             |                     | MAP4K2         | 12.1                                  |                             |
| DAPK1                   | -6.3                                  |                             |                     | FGR            | 12.0                                  |                             |
| PLK1                    | -6.4                                  |                             |                     | EPHB3          | 12.0                                  |                             |
| CK1 $\gamma$ 1          | -7.0                                  |                             |                     | TRKB           | 11.9                                  |                             |
| CK1 $\delta$            | -8.7                                  |                             |                     | PKD2           | 11.8                                  |                             |
| CDC7/ASK                | -9.6                                  |                             |                     | EPHB4          | 11.8                                  |                             |
| MAPKAPK2                | -14.4                                 |                             |                     | SPHK1          | 11.6                                  |                             |
|                         |                                       |                             |                     | MLK3_Cascade   | 11.4                                  |                             |
|                         |                                       |                             |                     | FLT4           | 11.4                                  |                             |
|                         |                                       |                             |                     | Erk1           | 11.4                                  |                             |
|                         |                                       |                             |                     | CLK1           | 11.2                                  |                             |
|                         |                                       |                             |                     | DYRK1B         | 11.2                                  |                             |
|                         |                                       |                             |                     | MRCK $\alpha$  | 11.1                                  |                             |
|                         |                                       |                             |                     | KIT            | 11.0                                  |                             |
|                         |                                       |                             |                     | CK1 $\gamma$ 3 | 10.9                                  |                             |
|                         |                                       |                             |                     | MET            | 10.9                                  |                             |
|                         |                                       |                             |                     | YES            | 10.5                                  |                             |
|                         |                                       |                             |                     | PAK4           | 10.1                                  |                             |
|                         |                                       |                             |                     | CaMK2 $\gamma$ | 10.1                                  |                             |
|                         |                                       |                             |                     | MAP2K4_Cascade | 9.9                                   |                             |
|                         |                                       |                             |                     | TAOK2          | 9.9                                   |                             |
|                         |                                       |                             |                     | LYNb           | 9.8                                   |                             |
|                         |                                       |                             |                     | MAP3K5_Cascade | 9.8                                   |                             |
|                         |                                       |                             |                     | KIT(D816E)     | 9.7                                   |                             |
|                         |                                       |                             |                     | RON            | 9.6                                   |                             |
|                         |                                       |                             |                     | Haspin         | 9.4                                   |                             |
|                         |                                       |                             |                     | MLK1_Cascade   | 9.3                                   |                             |
|                         |                                       |                             |                     | YES(T348I)     | 9.2                                   |                             |
|                         |                                       |                             |                     | TRKC           | 9.2                                   |                             |
|                         |                                       |                             |                     | HER4           | 9.2                                   |                             |
|                         |                                       |                             |                     | LATS2          | 9.1                                   |                             |
|                         |                                       |                             |                     | CDK2/CycA2     | 9.1                                   |                             |
|                         |                                       |                             |                     | TIE2           | 9.0                                   |                             |
|                         |                                       |                             |                     | JAK2           | 8.8                                   |                             |
|                         |                                       |                             |                     | CaMK2 $\beta$  | 8.8                                   |                             |
|                         |                                       |                             |                     | SLK            | 8.8                                   |                             |
|                         |                                       |                             |                     | MST3           | 8.7                                   |                             |
|                         |                                       |                             |                     | FLT3           | 8.7                                   |                             |
|                         |                                       |                             |                     | DYRK1A         | 8.7                                   |                             |
|                         |                                       |                             |                     | PAK1           | 8.7                                   |                             |
|                         |                                       |                             |                     | PKAC $\gamma$  | 8.6                                   |                             |



| Kinase                                 | % Inhibition          |                             |
|----------------------------------------|-----------------------|-----------------------------|
|                                        | BRD5648<br>10 $\mu$ M | IC <sub>50</sub> ( $\mu$ M) |
| MET(D1228H)                            | 8.5                   |                             |
| AMPK $\alpha$ 1/ $\beta$ 1/ $\gamma$ 1 | 8.4                   |                             |
| PIM2                                   | 8.4                   |                             |
| RSK2                                   | 8.4                   |                             |
| EPHA7                                  | 8.4                   |                             |
| KIT(V654A)                             | 8.2                   |                             |
| MNK2                                   | 8.1                   |                             |
| EGFR(d746-750)                         | 8.0                   |                             |
| BLK                                    | 8.0                   |                             |
| CDK5/p25                               | 7.9                   |                             |
| SIK                                    | 7.8                   |                             |
| CHK1                                   | 7.7                   |                             |
| PEK                                    | 7.7                   |                             |
| CDC2/CycB1                             | 7.6                   |                             |
| AMPK $\alpha$ 2/ $\beta$ 1/ $\gamma$ 1 | 7.6                   |                             |
| DYRK3                                  | 7.6                   |                             |
| TRKA                                   | 7.5                   |                             |
| DCAMKL2                                | 7.4                   |                             |
| MAP3K2_Cascade                         | 7.3                   |                             |
| PDGFR $\alpha$ (T674I)                 | 7.2                   |                             |
| TAK1-TAB1_Cascade                      | 7.2                   |                             |
| FRK                                    | 7.2                   |                             |
| CaMK2 $\delta$                         | 7.2                   |                             |
| TNK1                                   | 6.9                   |                             |
| PKC $\iota$                            | 6.9                   |                             |
| MINK                                   | 6.6                   |                             |
| PAK5                                   | 6.5                   |                             |
| FLT1                                   | 6.4                   |                             |
| EGFR(L858R)                            | 6.3                   |                             |
| MET(M1250T)                            | 6.3                   |                             |
| IKK $\alpha$                           | 6.3                   |                             |
| EGFR(L861Q)                            | 6.1                   |                             |
| ROS                                    | 6.1                   |                             |
| Erk2                                   | 6.0                   |                             |
| MST1                                   | 5.9                   |                             |
| IRAK1                                  | 5.9                   |                             |
| ITK                                    | 5.7                   |                             |
| CDK9/CycT1                             | 5.7                   |                             |
| MNK1                                   | 5.7                   |                             |
| EGFR(T790M/L858R)                      | 5.7                   |                             |
| INSR                                   | 5.6                   |                             |
| PRKX                                   | 5.3                   |                             |
| PKC $\delta$                           | 5.2                   |                             |
| PLK1                                   | 5.2                   |                             |
| CaMK2 $\alpha$                         | 5.1                   |                             |
| TSSK2                                  | 5.1                   |                             |
| CDC7/ASK                               | 5.0                   |                             |
| PHKG2                                  | 4.9                   |                             |
| PBK                                    | 4.8                   |                             |

| Kinase                 | % Inhibition          |                             |
|------------------------|-----------------------|-----------------------------|
|                        | BRD5648<br>10 $\mu$ M | IC <sub>50</sub> ( $\mu$ M) |
| KIT(D816V)             | 4.8                   |                             |
| CaMK1 $\alpha$         | 4.8                   |                             |
| EPHA4                  | 4.7                   |                             |
| FGFR4                  | 4.7                   |                             |
| BRSK1                  | 4.7                   |                             |
| FGFR3                  | 4.5                   |                             |
| PDGFR $\alpha$ (V561D) | 4.5                   |                             |
| MAPKAPK5               | 4.4                   |                             |
| KIT(T670I)             | 4.4                   |                             |
| JNK2                   | 4.3                   |                             |
| RSK1                   | 4.2                   |                             |
| SRPK1                  | 4.1                   |                             |
| PKC $\gamma$           | 4.1                   |                             |
| JNK1                   | 4.0                   |                             |
| EGFR                   | 4.0                   |                             |
| MET(Y1235D)            | 4.0                   |                             |
| BRSK2                  | 3.9                   |                             |
| FES                    | 3.9                   |                             |
| RSK3                   | 3.8                   |                             |
| WNK2                   | 3.7                   |                             |
| NEK1                   | 3.7                   |                             |
| SRM                    | 3.4                   |                             |
| FGFR3(K650M)           | 3.4                   |                             |
| ALK(F1174L)            | 3.4                   |                             |
| KDR                    | 3.3                   |                             |
| p38 $\alpha$           | 3.0                   |                             |
| MST2                   | 3.0                   |                             |
| SGK2                   | 3.0                   |                             |
| MARK1                  | 2.9                   |                             |
| EPHA3                  | 2.9                   |                             |
| PKC $\epsilon$         | 2.8                   |                             |
| TXK                    | 2.8                   |                             |
| PDGFR $\alpha$         | 2.6                   |                             |
| SGK                    | 2.5                   |                             |
| FGFR3(K650E)           | 2.5                   |                             |
| EGFR(d746-750/T790M)   | 2.5                   |                             |
| NPM1-ALK               | 2.4                   |                             |
| MST4                   | 2.4                   |                             |
| LYNa                   | 2.3                   |                             |
| EML4-ALK               | 2.3                   |                             |
| DAPK1                  | 2.2                   |                             |
| MSK1                   | 2.1                   |                             |
| CDK2/CycE1             | 2.1                   |                             |
| RSK4                   | 2.1                   |                             |
| EPHA1                  | 2.0                   |                             |
| TEC                    | 2.0                   |                             |
| CRIK                   | 2.0                   |                             |
| JAK1                   | 2.0                   |                             |
| FGFR2                  | 2.0                   |                             |

| Kinase                 | % Inhibition          |                             |
|------------------------|-----------------------|-----------------------------|
|                        | BRD5648<br>10 $\mu$ M | IC <sub>50</sub> ( $\mu$ M) |
| MAPKAPK3               | 1.9                   |                             |
| MAP2K7_Cascade         | 1.8                   |                             |
| ROCK1                  | 1.8                   |                             |
| JAK3                   | 1.7                   |                             |
| MAP2K5_Cascade         | 1.5                   |                             |
| QIK                    | 1.5                   |                             |
| NEK6                   | 1.4                   |                             |
| PAK6                   | 1.3                   |                             |
| ACK                    | 1.3                   |                             |
| EPHA8                  | 1.2                   |                             |
| EPHA2                  | 1.1                   |                             |
| ROCK2                  | 1.1                   |                             |
| FGFR4(V550E)           | 0.9                   |                             |
| AurC                   | 0.9                   |                             |
| FYN(isoform b)         | 0.8                   |                             |
| RET(Y791F)             | 0.7                   |                             |
| EGFR(T790M)            | 0.7                   |                             |
| FGFR1                  | 0.6                   |                             |
| FGFR4(V550L)           | 0.6                   |                             |
| MARK3                  | 0.6                   |                             |
| MGC42105               | 0.5                   |                             |
| FER                    | 0.4                   |                             |
| SRC                    | 0.4                   |                             |
| DYRK2                  | 0.3                   |                             |
| AXL                    | 0.2                   |                             |
| NuaK1                  | 0.0                   |                             |
| ABL                    | 0.0                   |                             |
| PDGFR $\alpha$ (D842V) | -0.4                  |                             |
| HIPK1                  | -0.4                  |                             |
| EEF2K                  | -0.5                  |                             |
| IGF1R                  | -0.5                  |                             |
| PKAC $\alpha$          | -0.6                  |                             |
| AurA/TPX2              | -0.6                  |                             |
| TYRO3                  | -0.6                  |                             |
| CDK7/CycH/MAT1         | -0.7                  |                             |
| PGK                    | -0.8                  |                             |
| MER                    | -0.9                  |                             |
| ABL(T315I)             | -1.0                  |                             |
| MSSK1                  | -1.0                  |                             |
| MRCK $\beta$           | -1.0                  |                             |
| NEK9                   | -1.1                  |                             |
| ABL(E255K)             | -1.1                  |                             |
| HCK                    | -1.1                  |                             |
| PDGFR $\beta$          | -1.4                  |                             |
| MARK2                  | -1.5                  |                             |
| ALK                    | -1.6                  |                             |
| EPHA5                  | -1.7                  |                             |
| EPHB1                  | -1.8                  |                             |
| IRR                    | -1.8                  |                             |

| Kinase                  | % Inhibition          |                             |
|-------------------------|-----------------------|-----------------------------|
|                         | BRD5648<br>10 $\mu$ M | IC <sub>50</sub> ( $\mu$ M) |
| ALK(R1275Q)             | -1.9                  |                             |
| IKK $\epsilon$          | -2.0                  |                             |
| MUSK                    | -2.1                  |                             |
| PKC $\beta$ 2           | -2.1                  |                             |
| SGK3                    | -2.3                  |                             |
| RET                     | -2.3                  |                             |
| MLK2_Cascade            | -2.4                  |                             |
| CDK4/CycD3              | -2.5                  |                             |
| NEK2                    | -2.7                  |                             |
| TSSK1                   | -2.7                  |                             |
| PKAC $\beta$            | -2.8                  |                             |
| Erk5                    | -2.8                  |                             |
| IRAK4                   | -2.8                  |                             |
| TBK1                    | -2.9                  |                             |
| PKC $\alpha$            | -2.9                  |                             |
| PDK1                    | -2.9                  |                             |
| ARG                     | -3.0                  |                             |
| FAK                     | -3.1                  |                             |
| WNK3                    | -3.3                  |                             |
| EPHB2                   | -3.4                  |                             |
| CSK                     | -3.4                  |                             |
| BRK                     | -3.5                  |                             |
| NuaK2                   | -3.5                  |                             |
| LTK                     | -3.6                  |                             |
| MAPKAPK2                | -3.9                  |                             |
| NEK4                    | -3.9                  |                             |
| PKR                     | -4.0                  |                             |
| MAP3K3_Cascade          | -4.2                  |                             |
| CK2 $\alpha$ 2/ $\beta$ | -4.4                  |                             |
| MAP2K6_Cascade          | -4.5                  |                             |
| RET(S891A)              | -4.9                  |                             |
| PKC $\theta$            | -4.9                  |                             |
| RET(M918T)              | -5.7                  |                             |
| WNK1                    | -5.8                  |                             |
| PYK2                    | -5.9                  |                             |
| NDR1                    | -6.1                  |                             |
| CK2 $\alpha$ 1/ $\beta$ | -6.2                  |                             |
| SYK                     | -6.6                  |                             |
| NEK7                    | -6.8                  |                             |
| SRPK2                   | -6.9                  |                             |
| PKC $\beta$ 1           | -7.3                  |                             |
| LOK                     | -7.7                  |                             |
| FGFR1(V561M)            | -8.0                  |                             |
| HIPK3                   | -9.6                  |                             |
| HIPK2                   | -9.6                  |                             |
| ALK(L1196M)             | -9.7                  |                             |
| NDR2                    | -9.8                  |                             |
| FYN(isoform a)          | -10.3                 |                             |
| p38 $\beta$             | -11.2                 |                             |

| Kinase         | % Inhibition          |                             |
|----------------|-----------------------|-----------------------------|
|                | BRD5648<br>10 $\mu$ M | IC <sub>50</sub> ( $\mu$ M) |
| MAP2K2_Cascade | -11.3                 |                             |
| RET(G691S)     | -11.6                 |                             |
| MARK4          | -11.8                 |                             |
| CGK2           | -11.8                 |                             |
| p38 $\delta$   | -12.2                 |                             |
| BTK            | -12.5                 |                             |
| JNK3           | -13.2                 |                             |
| BMX            | -13.7                 |                             |
| PKC $\eta$     | -14.6                 |                             |
| MAP2K3_Cascade | -20.4                 |                             |
| AKT2           | -24.7                 |                             |
| p38 $\gamma$   | -26.3                 |                             |
| PKC $\zeta$    | -28.1                 |                             |
| AKT3           | -30.6                 |                             |
| AKT1           | -37.8                 |                             |

**Table S6. Kinome selectivity for BRD0705 and BRD3731 (Carna biosciences, JP)**

| Kinase                                 | % Inhibition<br>BRD0705<br>10 $\mu$ M | IC <sub>50</sub> ( $\mu$ M) | Fold<br>selectivity | Kinase                                 | % Inhibition<br>BRD3731<br>10 $\mu$ M | IC <sub>50</sub> ( $\mu$ M) | Fold<br>selectivity |
|----------------------------------------|---------------------------------------|-----------------------------|---------------------|----------------------------------------|---------------------------------------|-----------------------------|---------------------|
| GSK3 $\alpha$                          | 100.8                                 | 0.079                       |                     | GSK3 $\beta$                           | 100.7                                 | 0.027                       |                     |
| GSK3 $\beta$                           | 96.5                                  | 0.488                       | 6.2                 | GSK3 $\alpha$                          | 96.8                                  | 0.211                       | 7.8                 |
| CDK2/CycA2                             | 65.3                                  | 6.87                        | 86.9                | CDK5/p25                               | 48.3                                  | 8.9                         | 331.0               |
| CDK2/CycE1                             | 53.4                                  | 9.43                        | 119.3               | RSK2                                   | 42.8                                  |                             |                     |
| CDK3/CycE1                             | 52.8                                  | 9.74                        | 123.3               | CDK2/CycE1                             | 42.6                                  | 8.8                         | 326.9               |
| CDK5/p25                               | 52.0                                  | 9.20                        | 116.4               | PIK3CA/PIK3R1                          | 42.5                                  |                             |                     |
| PAK4                                   | 33.8                                  |                             |                     | MELK                                   | 39.2                                  |                             |                     |
| ROS                                    | 31.3                                  |                             |                     | CDK2/CycA2                             | 36.3                                  | >10                         | >370                |
| EPHA3                                  | 25.2                                  |                             |                     | RSK3                                   | 35.5                                  |                             |                     |
| FLT3                                   | 25.0                                  |                             |                     | RSK4                                   | 33.9                                  |                             |                     |
| FGFR4(N535K)                           | 22.1                                  |                             |                     | MER                                    | 33.7                                  |                             |                     |
| CDC2/CycB1                             | 17.2                                  |                             |                     | TSSK3                                  | 33.6                                  |                             |                     |
| HGK                                    | 14.9                                  |                             |                     | CDK3/CycE1                             | 29.2                                  | >10                         | >370                |
| EPHB4                                  | 14.7                                  |                             |                     | CDK6/CycD3                             | 28.3                                  | >10                         | >370                |
| EPHA5                                  | 12.7                                  |                             |                     | CK1 $\epsilon$                         | 28.0                                  |                             |                     |
| MST3                                   | 11.7                                  |                             |                     | CDC2/CycB1                             | 27.8                                  |                             |                     |
| MAP3K4_Cascade                         | 11.6                                  |                             |                     | PDHK4                                  | 24.2                                  |                             |                     |
| COT_Cascade                            | 11.2                                  |                             |                     | RSK1                                   | 23.4                                  |                             |                     |
| PDHK4                                  | 11.0                                  |                             |                     | MARK4                                  | 22.7                                  |                             |                     |
| LOK                                    | 9.6                                   |                             |                     | MAPKAPK2                               | 22.4                                  |                             |                     |
| PAK5                                   | 9.3                                   |                             |                     | CDK7/CycH/MAT1                         | 21.3                                  |                             |                     |
| CDK9/CycT1                             | 8.4                                   |                             |                     | CDK4/CycD3                             | 18.1                                  |                             |                     |
| CDK7/CycH/MAT1                         | 8.3                                   |                             |                     | PKD2                                   | 17.2                                  |                             |                     |
| YES                                    | 7.9                                   |                             |                     | PKA $\alpha$                           | 17.1                                  |                             |                     |
| BRAF_Cascade                           | 7.8                                   |                             |                     | FLT4                                   | 16.8                                  |                             |                     |
| DYRK3                                  | 7.7                                   |                             |                     | CaMK1 $\delta$                         | 16.7                                  |                             |                     |
| RAF1_Cascade                           | 7.5                                   |                             |                     | AMPK $\alpha$ 2/ $\beta$ 1/ $\gamma$ 1 | 16.7                                  |                             |                     |
| EPHA6                                  | 7.4                                   |                             |                     | MARK2                                  | 16.5                                  |                             |                     |
| AurC                                   | 7.3                                   |                             |                     | PKN1                                   | 16.2                                  |                             |                     |
| BRAF(V600E)_Cascad                     | 7.0                                   |                             |                     | DYRK3                                  | 16.0                                  |                             |                     |
| TNIK                                   | 6.8                                   |                             |                     | HIPK4                                  | 15.9                                  |                             |                     |
| MAP2K3_Cascade                         | 6.7                                   |                             |                     | AurA                                   | 15.4                                  |                             |                     |
| EPHB2                                  | 6.5                                   |                             |                     | SPHK2                                  | 15.2                                  |                             |                     |
| PAK2                                   | 6.4                                   |                             |                     | PLK4                                   | 14.3                                  |                             |                     |
| TRKC                                   | 6.4                                   |                             |                     | PHKG1                                  | 13.9                                  |                             |                     |
| MLK1_Cascade                           | 6.3                                   |                             |                     | FLT3                                   | 13.8                                  |                             |                     |
| AurA                                   | 6.1                                   |                             |                     | PIM3                                   | 13.1                                  |                             |                     |
| CK1 $\alpha$                           | 6.0                                   |                             |                     | PDHK2                                  | 12.7                                  |                             |                     |
| MAP3K3_Cascade                         | 5.6                                   |                             |                     | p70S6 $\beta$                          | 12.6                                  |                             |                     |
| AMPK $\alpha$ 2/ $\beta$ 1/ $\gamma$ 1 | 5.1                                   |                             |                     | MSK2                                   | 12.6                                  |                             |                     |
| TAK1-TAB1_Cascade                      | 5.0                                   |                             |                     | p70S6K                                 | 12.5                                  |                             |                     |
| LCK                                    | 5.0                                   |                             |                     | MAP3K4_Cascade                         | 12.4                                  |                             |                     |
| MLK3_Cascade                           | 4.6                                   |                             |                     | CaMK4                                  | 12.4                                  |                             |                     |
| TRKB                                   | 4.5                                   |                             |                     | TRKC                                   | 12.1                                  |                             |                     |
| ABL                                    | 4.2                                   |                             |                     | PKC $\theta$                           | 12.1                                  |                             |                     |
| MAP2K6_Cascade                         | 4.2                                   |                             |                     | FGR                                    | 12.0                                  |                             |                     |
| JAK3                                   | 4.1                                   |                             |                     | TRKA                                   | 12.0                                  |                             |                     |
| PLK2                                   | 4.0                                   |                             |                     | ABL                                    | 11.4                                  |                             |                     |
| IRR                                    | 4.0                                   |                             |                     | CDK9/CycT1                             | 11.3                                  |                             |                     |

| Kinase         | % Inhibition<br>BRD0705<br>10 $\mu$ M | IC <sub>50</sub> ( $\mu$ M) | Fold<br>selectivity | Kinase                                 | % Inhibition<br>BRD3731<br>10 $\mu$ M | IC <sub>50</sub> ( $\mu$ M) | Fold<br>selectivity |
|----------------|---------------------------------------|-----------------------------|---------------------|----------------------------------------|---------------------------------------|-----------------------------|---------------------|
| EPHA4          | 4.0                                   |                             |                     | AMPK $\alpha$ 1/ $\beta$ 1/ $\gamma$ 1 | 11.2                                  |                             |                     |
| PKD3           | 3.9                                   |                             |                     | PIM1                                   | 11.0                                  |                             |                     |
| TYRO3          | 3.8                                   |                             |                     | TRKB                                   | 11.0                                  |                             |                     |
| AXL            | 3.7                                   |                             |                     | PKC $\delta$                           | 10.7                                  |                             |                     |
| NPM1-ALK       | 3.7                                   |                             |                     | PASK                                   | 10.7                                  |                             |                     |
| PYK2           | 3.5                                   |                             |                     | CK1 $\delta$                           | 10.7                                  |                             |                     |
| KIT(D816V)     | 3.5                                   |                             |                     | COT_Cascade                            | 10.5                                  |                             |                     |
| NEK9           | 3.5                                   |                             |                     | SGK2                                   | 10.4                                  |                             |                     |
| TSSK3          | 3.5                                   |                             |                     | EGFR                                   | 10.0                                  |                             |                     |
| PKAC $\alpha$  | 3.4                                   |                             |                     | EPHA6                                  | 9.6                                   |                             |                     |
| EML4-ALK       | 3.4                                   |                             |                     | RET(Y791F)                             | 9.5                                   |                             |                     |
| YES(T348I)     | 3.3                                   |                             |                     | skMLCK                                 | 9.4                                   |                             |                     |
| SRC            | 3.2                                   |                             |                     | MARK1                                  | 9.3                                   |                             |                     |
| IRAK1          | 3.1                                   |                             |                     | PKAC $\beta$                           | 9.3                                   |                             |                     |
| MARK1          | 3.1                                   |                             |                     | LCK                                    | 9.2                                   |                             |                     |
| FYN            | 3.1                                   |                             |                     | BRAF_Cascade                           | 8.9                                   |                             |                     |
| MAP2K1_Cascade | 3.0                                   |                             |                     | PKD1                                   | 8.9                                   |                             |                     |
| EPHA8          | 2.9                                   |                             |                     | PLK2                                   | 8.5                                   |                             |                     |
| TRKA           | 2.9                                   |                             |                     | ABL(E255K)                             | 8.3                                   |                             |                     |
| CHK1           | 2.9                                   |                             |                     | SIK                                    | 8.2                                   |                             |                     |
| BMX            | 2.7                                   |                             |                     | PKC $\alpha$                           | 8.1                                   |                             |                     |
| p38 $\delta$   | 2.4                                   |                             |                     | BRSK1                                  | 7.9                                   |                             |                     |
| MINK           | 2.4                                   |                             |                     | DDR2                                   | 7.9                                   |                             |                     |
| LYNb           | 2.2                                   |                             |                     | JAK3                                   | 7.8                                   |                             |                     |
| MLK2_Cascade   | 2.1                                   |                             |                     | DDR1                                   | 7.6                                   |                             |                     |
| HIPK4          | 2.1                                   |                             |                     | MAP2K4_Cascade                         | 7.6                                   |                             |                     |
| BTK            | 2.1                                   |                             |                     | LIMK1                                  | 7.5                                   |                             |                     |
| MARK4          | 2.0                                   |                             |                     | MST3                                   | 7.4                                   |                             |                     |
| PKR            | 2.0                                   |                             |                     | MSK1                                   | 7.4                                   |                             |                     |
| MAP3K5_Cascade | 1.9                                   |                             |                     | KDR                                    | 7.1                                   |                             |                     |
| MAP3K1_Cascade | 1.8                                   |                             |                     | TIE2                                   | 6.7                                   |                             |                     |
| BRSK2          | 1.8                                   |                             |                     | PDGFR $\alpha$                         | 6.7                                   |                             |                     |
| PKN1           | 1.8                                   |                             |                     | HCK                                    | 6.6                                   |                             |                     |
| FER            | 1.7                                   |                             |                     | PDGFR $\alpha$ (V561D)                 | 6.6                                   |                             |                     |
| ALK(F1174L)    | 1.7                                   |                             |                     | PAK5                                   | 6.5                                   |                             |                     |
| PEK            | 1.7                                   |                             |                     | PKAC $\gamma$                          | 6.5                                   |                             |                     |
| TBK1           | 1.7                                   |                             |                     | HER4                                   | 6.5                                   |                             |                     |
| Erk2           | 1.6                                   |                             |                     | SRPK2                                  | 6.4                                   |                             |                     |
| HER4           | 1.3                                   |                             |                     | MST4                                   | 6.4                                   |                             |                     |
| MAP2K2_Cascade | 1.3                                   |                             |                     | FER                                    | 6.4                                   |                             |                     |
| PIM3           | 1.2                                   |                             |                     | EPHB2                                  | 6.4                                   |                             |                     |
| ALK            | 1.1                                   |                             |                     | ARG                                    | 6.4                                   |                             |                     |
| HCK            | 1.1                                   |                             |                     | IRR                                    | 6.2                                   |                             |                     |
| RSK4           | 1.1                                   |                             |                     | MAPKAPK5                               | 6.1                                   |                             |                     |
| ARG            | 1.1                                   |                             |                     | MAP2K5_Cascade                         | 6.1                                   |                             |                     |
| MAP3K2_Cascade | 1.0                                   |                             |                     | CLK2                                   | 6.1                                   |                             |                     |
| CSK            | 0.9                                   |                             |                     | PHKG2                                  | 6.0                                   |                             |                     |
| FRK            | 0.9                                   |                             |                     | MAPKAPK3                               | 6.0                                   |                             |                     |
| SGK2           | 0.8                                   |                             |                     | HIPK1                                  | 5.8                                   |                             |                     |

| Kinase                 | % Inhibition<br>BRD0705<br>10 $\mu$ M | IC <sub>50</sub> ( $\mu$ M) | Fold<br>selectivity | Kinase                 | % Inhibition<br>BRD3731<br>10 $\mu$ M | IC <sub>50</sub> ( $\mu$ M) | Fold<br>selectivity |
|------------------------|---------------------------------------|-----------------------------|---------------------|------------------------|---------------------------------------|-----------------------------|---------------------|
| ALK(R1275Q)            | 0.7                                   |                             |                     | TTK                    | 5.4                                   |                             |                     |
| ABL(T315I)             | 0.7                                   |                             |                     | PYK2                   | 5.3                                   |                             |                     |
| FES                    | 0.6                                   |                             |                     | Haspin                 | 5.3                                   |                             |                     |
| SYK                    | 0.6                                   |                             |                     | FMS                    | 5.2                                   |                             |                     |
| PIM2                   | 0.5                                   |                             |                     | PKC $\zeta$            | 5.0                                   |                             |                     |
| PDGFR $\alpha$ (T674I) | 0.5                                   |                             |                     | PKC $\gamma$           | 5.0                                   |                             |                     |
| RSK2                   | 0.4                                   |                             |                     | SRPK1                  | 5.0                                   |                             |                     |
| ALK(L1196M)            | 0.4                                   |                             |                     | BLK                    | 4.9                                   |                             |                     |
| ITK                    | 0.3                                   |                             |                     | AurC                   | 4.9                                   |                             |                     |
| PDGFR $\beta$          | 0.3                                   |                             |                     | CaMK1 $\alpha$         | 4.7                                   |                             |                     |
| EGFR                   | 0.3                                   |                             |                     | TYK2                   | 4.6                                   |                             |                     |
| TIE2                   | 0.3                                   |                             |                     | Erk5                   | 4.5                                   |                             |                     |
| PASK                   | 0.2                                   |                             |                     | CGK2                   | 4.4                                   |                             |                     |
| IKK $\alpha$           | -0.2                                  |                             |                     | MRCK $\alpha$          | 4.3                                   |                             |                     |
| KIT                    | -0.3                                  |                             |                     | DYRK2                  | 4.1                                   |                             |                     |
| ABL(E255K)             | -0.3                                  |                             |                     | PKC $\beta$ 1          | 4.1                                   |                             |                     |
| CK1 $\epsilon$         | -0.4                                  |                             |                     | CLK3                   | 4.0                                   |                             |                     |
| LYNa                   | -0.4                                  |                             |                     | MAP3K1_Cascade         | 4.0                                   |                             |                     |
| FGFR4(V550L)           | -0.4                                  |                             |                     | PLK3                   | 4.0                                   |                             |                     |
| MST4                   | -0.4                                  |                             |                     | EEF2K                  | 3.9                                   |                             |                     |
| TEC                    | -0.4                                  |                             |                     | KIT(D816E)             | 3.9                                   |                             |                     |
| JAK2                   | -0.5                                  |                             |                     | MST1                   | 3.9                                   |                             |                     |
| HIPK2                  | -0.5                                  |                             |                     | HER2                   | 3.8                                   |                             |                     |
| PKC $\alpha$           | -0.5                                  |                             |                     | PKC $\beta$ 2          | 3.8                                   |                             |                     |
| FGFR4(V550E)           | -0.5                                  |                             |                     | TSSK2                  | 3.8                                   |                             |                     |
| DCAMKL2                | -0.5                                  |                             |                     | AXL                    | 3.8                                   |                             |                     |
| PDHK2                  | -0.5                                  |                             |                     | AurA/TPX2              | 3.8                                   |                             |                     |
| CDK6/CycD3             | -0.5                                  |                             |                     | JAK1                   | 3.7                                   |                             |                     |
| MUSK                   | -0.6                                  |                             |                     | EGFR(d746-750/T790M)   | 3.7                                   |                             |                     |
| MAP2K7_Cascade         | -0.6                                  |                             |                     | CK1 $\gamma$ 2         | 3.6                                   |                             |                     |
| MAP4K2                 | -0.7                                  |                             |                     | ALK(L1196M)            | 3.6                                   |                             |                     |
| KIT(T670I)             | -0.8                                  |                             |                     | LKB1                   | 3.4                                   |                             |                     |
| PDGFR $\alpha$         | -0.8                                  |                             |                     | Erk1                   | 3.4                                   |                             |                     |
| MET(Y1235D)            | -1.0                                  |                             |                     | SPHK1                  | 3.4                                   |                             |                     |
| PKC $\zeta$            | -1.0                                  |                             |                     | MAP2K6_Cascade         | 3.3                                   |                             |                     |
| NEK7                   | -1.0                                  |                             |                     | DYRK1A                 | 3.3                                   |                             |                     |
| MAPKAPK5               | -1.0                                  |                             |                     | HIPK3                  | 3.2                                   |                             |                     |
| MOS_Cascade            | -1.0                                  |                             |                     | FLT1                   | 3.2                                   |                             |                     |
| KIT(V654A)             | -1.0                                  |                             |                     | FRK                    | 3.2                                   |                             |                     |
| DLK_Cascade            | -1.1                                  |                             |                     | HIPK2                  | 3.2                                   |                             |                     |
| JAK1                   | -1.3                                  |                             |                     | EPHA2                  | 3.2                                   |                             |                     |
| EPHB3                  | -1.3                                  |                             |                     | MAP2K1_Cascade         | 3.1                                   |                             |                     |
| DDR2                   | -1.4                                  |                             |                     | PDGFR $\beta$          | 3.1                                   |                             |                     |
| INSR                   | -1.4                                  |                             |                     | CLK1                   | 3.1                                   |                             |                     |
| BRK                    | -1.4                                  |                             |                     | PKR                    | 3.1                                   |                             |                     |
| CLK3                   | -1.5                                  |                             |                     | PDGFR $\alpha$ (T674I) | 3.1                                   |                             |                     |
| MSSK1                  | -1.6                                  |                             |                     | EPHA3                  | 3.0                                   |                             |                     |
| BRSK1                  | -1.6                                  |                             |                     | JAK2                   | 3.0                                   |                             |                     |
| KIT(V560G)             | -1.7                                  |                             |                     | MAP2K7_Cascade         | 3.0                                   |                             |                     |



| Kinase               | % Inhibition<br>BRD0705<br>10 $\mu$ M | IC <sub>50</sub> ( $\mu$ M) | Fold<br>selectivity | Kinase            | % Inhibition<br>BRD3731<br>10 $\mu$ M | IC <sub>50</sub> ( $\mu$ M) | Fold<br>selectivity |
|----------------------|---------------------------------------|-----------------------------|---------------------|-------------------|---------------------------------------|-----------------------------|---------------------|
| NuaK2                | -1.7                                  |                             |                     | ALK               | 3.0                                   |                             |                     |
| TXK                  | -1.7                                  |                             |                     | RET               | 3.0                                   |                             |                     |
| EGFR(L861Q)          | -1.8                                  |                             |                     | NEK9              | 2.9                                   |                             |                     |
| SGK3                 | -1.8                                  |                             |                     | LYNb              | 2.9                                   |                             |                     |
| DDR1                 | -2.0                                  |                             |                     | FGFR4(V550L)      | 2.9                                   |                             |                     |
| ROCK1                | -2.0                                  |                             |                     | ITK               | 2.8                                   |                             |                     |
| SRPK1                | -2.0                                  |                             |                     | MSSK1             | 2.8                                   |                             |                     |
| NuaK1                | -2.0                                  |                             |                     | EGFR(L861Q)       | 2.7                                   |                             |                     |
| p70S6K $\beta$       | -2.1                                  |                             |                     | EPHB1             | 2.7                                   |                             |                     |
| CK1 $\gamma$ 3       | -2.1                                  |                             |                     | PKD3              | 2.6                                   |                             |                     |
| PGK                  | -2.1                                  |                             |                     | EGFR(d746-750)    | 2.5                                   |                             |                     |
| RET(Y791F)           | -2.2                                  |                             |                     | PKC $\iota$       | 2.5                                   |                             |                     |
| TYK2                 | -2.2                                  |                             |                     | FGFR1             | 2.3                                   |                             |                     |
| MAP2K5_Cascade       | -2.3                                  |                             |                     | RON               | 2.3                                   |                             |                     |
| EPHA1                | -2.3                                  |                             |                     | FAK               | 2.3                                   |                             |                     |
| MET                  | -2.4                                  |                             |                     | TEC               | 2.3                                   |                             |                     |
| SRPK2                | -2.5                                  |                             |                     | TAOK2             | 2.2                                   |                             |                     |
| JNK2                 | -2.5                                  |                             |                     | MINK              | 2.2                                   |                             |                     |
| skMLCK               | -2.5                                  |                             |                     | EPHA1             | 2.1                                   |                             |                     |
| PHKG1                | -2.5                                  |                             |                     | WNK3              | 2.1                                   |                             |                     |
| MSK2                 | -2.5                                  |                             |                     | PDK1              | 2.0                                   |                             |                     |
| IGF1R                | -2.5                                  |                             |                     | DYRK1B            | 2.0                                   |                             |                     |
| EPHA2                | -2.6                                  |                             |                     | CSK               | 1.9                                   |                             |                     |
| FLT1                 | -2.6                                  |                             |                     | ALK(R1275Q)       | 1.9                                   |                             |                     |
| FGFR1                | -2.7                                  |                             |                     | EPHB4             | 1.9                                   |                             |                     |
| p38 $\beta$          | -2.7                                  |                             |                     | PGK               | 1.9                                   |                             |                     |
| FGFR3(K650M)         | -2.7                                  |                             |                     | FGFR2             | 1.9                                   |                             |                     |
| AurB                 | -2.8                                  |                             |                     | IKK $\alpha$      | 1.8                                   |                             |                     |
| FGFR3                | -2.8                                  |                             |                     | PKC $\epsilon$    | 1.8                                   |                             |                     |
| PAK1                 | -2.9                                  |                             |                     | MAP3K3_Cascade    | 1.8                                   |                             |                     |
| RET(M918T)           | -2.9                                  |                             |                     | TAK1-TAB1_Cascade | 1.7                                   |                             |                     |
| MAP2K4_Cascade       | -3.0                                  |                             |                     | YES               | 1.6                                   |                             |                     |
| CaMK1 $\delta$       | -3.0                                  |                             |                     | WNK2              | 1.6                                   |                             |                     |
| DYRK2                | -3.0                                  |                             |                     | CHK2              | 1.5                                   |                             |                     |
| CLK2                 | -3.0                                  |                             |                     | MST2              | 1.5                                   |                             |                     |
| RET(S891A)           | -3.1                                  |                             |                     | PEK               | 1.4                                   |                             |                     |
| DYRK1A               | -3.1                                  |                             |                     | KIT(V560G)        | 1.4                                   |                             |                     |
| FGFR1(V561M)         | -3.2                                  |                             |                     | TXK               | 1.3                                   |                             |                     |
| MER                  | -3.3                                  |                             |                     | CK1 $\gamma$ 1    | 1.2                                   |                             |                     |
| MST2                 | -3.4                                  |                             |                     | MET(Y1235D)       | 1.2                                   |                             |                     |
| TSSK2                | -3.4                                  |                             |                     | IRAK1             | 1.2                                   |                             |                     |
| JNK3                 | -3.4                                  |                             |                     | SRC               | 1.0                                   |                             |                     |
| PIM1                 | -3.4                                  |                             |                     | DLK_Cascade       | 0.9                                   |                             |                     |
| p38 $\gamma$         | -3.4                                  |                             |                     | Erk2              | 0.9                                   |                             |                     |
| FGR                  | -3.4                                  |                             |                     | SRM               | 0.9                                   |                             |                     |
| CK1 $\gamma$ 1       | -3.4                                  |                             |                     | p38 $\alpha$      | 0.9                                   |                             |                     |
| BLK                  | -3.4                                  |                             |                     | ROS               | 0.9                                   |                             |                     |
| EGFR(d746-750/T790M) | -3.5                                  |                             |                     | MET(M1250T)       | 0.8                                   |                             |                     |
| PKAC $\gamma$        | -3.6                                  |                             |                     | ROCK1             | 0.8                                   |                             |                     |

| Kinase                                 | % Inhibition<br>BRD0705<br>10 $\mu$ M | IC <sub>50</sub> ( $\mu$ M) | Fold<br>selectivity | Kinase         | % Inhibition<br>BRD3731<br>10 $\mu$ M | IC <sub>50</sub> ( $\mu$ M) | Fold<br>selectivity |
|----------------------------------------|---------------------------------------|-----------------------------|---------------------|----------------|---------------------------------------|-----------------------------|---------------------|
| CHK2                                   | -3.6                                  |                             |                     | FGFR3(K650M)   | 0.8                                   |                             |                     |
| LTK                                    | -3.6                                  |                             |                     | PIM2           | 0.8                                   |                             |                     |
| PDGFR $\alpha$ (V561D)                 | -3.7                                  |                             |                     | FGFR3(K650E)   | 0.7                                   |                             |                     |
| WNK3                                   | -3.7                                  |                             |                     | PBK            | 0.6                                   |                             |                     |
| RON                                    | -3.8                                  |                             |                     | PAK4           | 0.6                                   |                             |                     |
| SPHK2                                  | -3.8                                  |                             |                     | MAP3K5_Cascade | 0.4                                   |                             |                     |
| MRCK $\alpha$                          | -3.8                                  |                             |                     | FES            | 0.4                                   |                             |                     |
| JNK1                                   | -3.9                                  |                             |                     | MLK2_Cascade   | 0.3                                   |                             |                     |
| CK1 $\delta$                           | -3.9                                  |                             |                     | CaMK2 $\beta$  | 0.3                                   |                             |                     |
| FAK                                    | -3.9                                  |                             |                     | FGFR1(V561M)   | 0.3                                   |                             |                     |
| PKC $\eta$                             | -4.0                                  |                             |                     | BTK            | 0.3                                   |                             |                     |
| EGFR(T790M/L858R)                      | -4.0                                  |                             |                     | ALK(F1174L)    | 0.2                                   |                             |                     |
| IKK $\beta$                            | -4.0                                  |                             |                     | IKK $\beta$    | 0.2                                   |                             |                     |
| EGFR(L858R)                            | -4.0                                  |                             |                     | IRAK4          | 0.1                                   |                             |                     |
| TNK1                                   | -4.0                                  |                             |                     | EPHB3          | 0.1                                   |                             |                     |
| AMPK $\alpha$ 1/ $\beta$ 1/ $\gamma$ 1 | -4.1                                  |                             |                     | FGFR4(V550E)   | 0.1                                   |                             |                     |
| WNK1                                   | -4.2                                  |                             |                     | MET(D1228H)    | 0.0                                   |                             |                     |
| PKC $\iota$                            | -4.3                                  |                             |                     | NEK6           | 0.0                                   |                             |                     |
| SGK                                    | -4.4                                  |                             |                     | PAK2           | 0.0                                   |                             |                     |
| CaMK2 $\delta$                         | -4.4                                  |                             |                     | NEK1           | -0.1                                  |                             |                     |
| IKK $\epsilon$                         | -4.5                                  |                             |                     | p38 $\beta$    | -0.2                                  |                             |                     |
| ACK                                    | -4.5                                  |                             |                     | PRKX           | -0.2                                  |                             |                     |
| PKC $\epsilon$                         | -4.5                                  |                             |                     | p38 $\delta$   | -0.2                                  |                             |                     |
| NEK2                                   | -4.5                                  |                             |                     | LYNa           | -0.3                                  |                             |                     |
| CaMK1 $\alpha$                         | -4.7                                  |                             |                     | CaMK2 $\delta$ | -0.3                                  |                             |                     |
| CaMK2 $\gamma$                         | -4.7                                  |                             |                     | KIT(T670I)     | -0.3                                  |                             |                     |
| AKT2                                   | -4.7                                  |                             |                     | MAP2K2_Cascade | -0.4                                  |                             |                     |
| PRKX                                   | -4.7                                  |                             |                     | SGK            | -0.4                                  |                             |                     |
| SIK                                    | -4.8                                  |                             |                     | TBK1           | -0.5                                  |                             |                     |
| NDR1                                   | -4.8                                  |                             |                     | ROCK2          | -0.5                                  |                             |                     |
| KDR                                    | -4.8                                  |                             |                     | RET(S891A)     | -0.6                                  |                             |                     |
| EGFR(T790M)                            | -4.9                                  |                             |                     | MRCK $\beta$   | -0.7                                  |                             |                     |
| WNK2                                   | -5.0                                  |                             |                     | CRIK           | -0.7                                  |                             |                     |
| Haspin                                 | -5.1                                  |                             |                     | PLK1           | -0.7                                  |                             |                     |
| NEK4                                   | -5.1                                  |                             |                     | FGFR3          | -0.7                                  |                             |                     |
| MNK1                                   | -5.2                                  |                             |                     | MAP3K2_Cascade | -0.7                                  |                             |                     |
| MARK3                                  | -5.3                                  |                             |                     | MET            | -0.8                                  |                             |                     |
| AurA/TPX2                              | -5.3                                  |                             |                     | TSSK1          | -0.8                                  |                             |                     |
| EPHA7                                  | -5.3                                  |                             |                     | MLK3_Cascade   | -0.8                                  |                             |                     |
| SRM                                    | -5.5                                  |                             |                     | NuaK1          | -0.9                                  |                             |                     |
| PKC $\delta$                           | -5.5                                  |                             |                     | LOK            | -1.0                                  |                             |                     |
| RET                                    | -5.6                                  |                             |                     | WNK1           | -1.0                                  |                             |                     |
| MELK                                   | -5.6                                  |                             |                     | AKT1           | -1.1                                  |                             |                     |
| RET(G691S)                             | -5.6                                  |                             |                     | TNIK           | -1.2                                  |                             |                     |
| NEK6                                   | -5.7                                  |                             |                     | CaMK2 $\gamma$ | -1.2                                  |                             |                     |
| PKC $\beta$ 2                          | -5.7                                  |                             |                     | EGFR(L858R)    | -1.2                                  |                             |                     |
| ROCK2                                  | -5.8                                  |                             |                     | DCAMKL2        | -1.3                                  |                             |                     |
| PHKG2                                  | -5.8                                  |                             |                     | ACK            | -1.3                                  |                             |                     |
| TAOK2                                  | -5.8                                  |                             |                     | FYN            | -1.3                                  |                             |                     |

| Kinase                  | % Inhibition<br>BRD0705<br>10 $\mu$ M | IC <sub>50</sub> ( $\mu$ M) | Fold<br>selectivity | Kinase                  | % Inhibition<br>BRD3731<br>10 $\mu$ M | IC <sub>50</sub> ( $\mu$ M) | Fold<br>selectivity |
|-------------------------|---------------------------------------|-----------------------------|---------------------|-------------------------|---------------------------------------|-----------------------------|---------------------|
| MNK2                    | -5.9                                  |                             |                     | IKK $\epsilon$          | -1.4                                  |                             |                     |
| CK2 $\alpha$ 1/ $\beta$ | -6.0                                  |                             |                     | IGF1R                   | -1.5                                  |                             |                     |
| DAPK1                   | -6.0                                  |                             |                     | KIT                     | -1.7                                  |                             |                     |
| DYRK1B                  | -6.1                                  |                             |                     | KIT(D816V)              | -1.7                                  |                             |                     |
| MARK2                   | -6.2                                  |                             |                     | SLK                     | -1.8                                  |                             |                     |
| QIK                     | -6.4                                  |                             |                     | KIT(V654A)              | -1.9                                  |                             |                     |
| EEF2K                   | -6.4                                  |                             |                     | EPHA8                   | -1.9                                  |                             |                     |
| RSK1                    | -6.4                                  |                             |                     | MARK3                   | -2.1                                  |                             |                     |
| HIPK1                   | -6.5                                  |                             |                     | CK1 $\gamma$ 3          | -2.1                                  |                             |                     |
| PKC $\beta$ 1           | -6.5                                  |                             |                     | NPM1-ALK                | -2.1                                  |                             |                     |
| PDK1                    | -6.7                                  |                             |                     | CK2 $\alpha$ 1/ $\beta$ | -2.1                                  |                             |                     |
| PKD1                    | -6.8                                  |                             |                     | NEK2                    | -2.1                                  |                             |                     |
| CK2 $\alpha$ 2/ $\beta$ | -7.0                                  |                             |                     | RET(M918T)              | -2.2                                  |                             |                     |
| CLK1                    | -7.1                                  |                             |                     | AurB                    | -2.3                                  |                             |                     |
| CaMK4                   | -7.1                                  |                             |                     | YES(T348I)              | -2.3                                  |                             |                     |
| CDC7/ASK                | -7.2                                  |                             |                     | CK2 $\alpha$ 2/ $\beta$ | -2.3                                  |                             |                     |
| MST1                    | -7.3                                  |                             |                     | RET(G691S)              | -2.3                                  |                             |                     |
| CGK2                    | -7.3                                  |                             |                     | MGC42105                | -2.4                                  |                             |                     |
| IRAK4                   | -7.4                                  |                             |                     | ABL(T315I)              | -2.4                                  |                             |                     |
| HIPK3                   | -7.6                                  |                             |                     | JNK3                    | -2.6                                  |                             |                     |
| PKAC $\beta$            | -7.7                                  |                             |                     | p38 $\gamma$            | -2.6                                  |                             |                     |
| p70S6K                  | -7.8                                  |                             |                     | EPHA4                   | -2.7                                  |                             |                     |
| FLT4                    | -7.9                                  |                             |                     | INSR                    | -2.8                                  |                             |                     |
| Erk5                    | -7.9                                  |                             |                     | NuaK2                   | -2.8                                  |                             |                     |
| RSK3                    | -7.9                                  |                             |                     | BRSK2                   | -2.9                                  |                             |                     |
| PBK                     | -8.0                                  |                             |                     | LATS2                   | -3.0                                  |                             |                     |
| PKC $\gamma$            | -8.0                                  |                             |                     | EPHA7                   | -3.0                                  |                             |                     |
| FMS                     | -8.2                                  |                             |                     | CDC7/ASK                | -3.1                                  |                             |                     |
| AKT1                    | -8.3                                  |                             |                     | NDR2                    | -3.2                                  |                             |                     |
| MAPKAPK3                | -8.3                                  |                             |                     | NEK7                    | -3.2                                  |                             |                     |
| AKT3                    | -8.3                                  |                             |                     | DAPK1                   | -3.4                                  |                             |                     |
| p38 $\alpha$            | -8.5                                  |                             |                     | TYRO3                   | -3.5                                  |                             |                     |
| TSSK1                   | -8.5                                  |                             |                     | LTK                     | -3.5                                  |                             |                     |
| CaMK2 $\alpha$          | -8.6                                  |                             |                     | NDR1                    | -3.7                                  |                             |                     |
| CaMK2 $\beta$           | -9.0                                  |                             |                     | HGK                     | -3.8                                  |                             |                     |
| MRCK $\beta$            | -9.1                                  |                             |                     | BMX                     | -3.8                                  |                             |                     |
| CDK4/CycD3              | -9.1                                  |                             |                     | JNK2                    | -3.9                                  |                             |                     |
| FGFR2                   | -9.2                                  |                             |                     | EGFR(T790M)             | -4.0                                  |                             |                     |
| NEK1                    | -9.6                                  |                             |                     | EGFR(T790M/L858R)       | -4.0                                  |                             |                     |
| Erk1                    | -9.8                                  |                             |                     | MNK1                    | -4.1                                  |                             |                     |
| NDR2                    | -9.9                                  |                             |                     | QIK                     | -4.1                                  |                             |                     |
| MGC42105                | -9.9                                  |                             |                     | CaMK2 $\alpha$          | -4.3                                  |                             |                     |
| EPHB1                   | -9.9                                  |                             |                     | BMPR1A                  | -4.4                                  |                             |                     |
| PIK3CA/PIK3R1           | -10.7                                 |                             |                     | NEK4                    | -4.8                                  |                             |                     |
| PAK6                    | -10.7                                 |                             |                     | BRAF(V600E)_Cascad      | -5.2                                  |                             |                     |
| SLK                     | -10.7                                 |                             |                     | SGK3                    | -5.2                                  |                             |                     |
| HER2                    | -11.1                                 |                             |                     | EPHA5                   | -5.5                                  |                             |                     |
| CK1 $\gamma$ 2          | -11.8                                 |                             |                     | BRK                     | -5.6                                  |                             |                     |
| LATS2                   | -11.9                                 |                             |                     | MNK2                    | -5.6                                  |                             |                     |

| Kinase         | % Inhibition<br>BRD0705<br>10 $\mu$ M | IC <sub>50</sub> ( $\mu$ M) | Fold<br>selectivity | Kinase         | % Inhibition<br>BRD3731<br>10 $\mu$ M | IC <sub>50</sub> ( $\mu$ M) | Fold<br>selectivity |
|----------------|---------------------------------------|-----------------------------|---------------------|----------------|---------------------------------------|-----------------------------|---------------------|
| EGFR(d746-750) | -12.0                                 |                             |                     | CK1 $\alpha$   | -5.6                                  |                             |                     |
| PKC $\theta$   | -12.0                                 |                             |                     | PKC $\eta$     | -5.8                                  |                             |                     |
| PLK1           | -12.3                                 |                             |                     | JNK1           | -6.0                                  |                             |                     |
| PLK3           | -12.5                                 |                             |                     | AKT3           | -6.4                                  |                             |                     |
| FGFR4          | -13.4                                 |                             |                     | RAF1_Cascade   | -6.6                                  |                             |                     |
| CRIK           | -15.2                                 |                             |                     | TNK1           | -6.7                                  |                             |                     |
| FGFR3(K650E)   | -15.5                                 |                             |                     | EML4-ALK       | -7.2                                  |                             |                     |
| SPHK1          | -20.5                                 |                             |                     | MAP4K2         | -7.5                                  |                             |                     |
| PKD2           | -22.1                                 |                             |                     | MUSK           | -7.9                                  |                             |                     |
| MAPKAPK2       | -22.4                                 |                             |                     | FGFR4          | -8.1                                  |                             |                     |
| MSK1           | -27.1                                 |                             |                     | AKT2           | -8.4                                  |                             |                     |
|                |                                       |                             |                     | MAP2K3_Cascade | -8.8                                  |                             |                     |
|                |                                       |                             |                     | WEE1           | -9.1                                  |                             |                     |
|                |                                       |                             |                     | MLK1_Cascade   | -9.4                                  |                             |                     |
|                |                                       |                             |                     | MOS_Cascade    | -9.5                                  |                             |                     |
|                |                                       |                             |                     | SYK            | -11.0                                 |                             |                     |
|                |                                       |                             |                     | CHK1           | -16.4                                 |                             |                     |
|                |                                       |                             |                     | PAK1           | -18.6                                 |                             |                     |
|                |                                       |                             |                     | PAK6           | -46.8                                 |                             |                     |

**Table S7. Lists of genes differentially expressed based on an absolute fold change of RPKM expression  $\geq 1.5$ , a P-value  $\leq 0.05$ , and a FDR  $\leq 0.05$  between control and BRD0705-treated U937 cells.**

Lists of genes with significant changes in expression induced by BRD0705 estimated by absolute fold change of RPKM expression  $\geq 1.5$ , P-value  $\leq 0.05$ , FDR  $\leq 0.05$ , out of the GRCh37/hg19 genes.

The 193 genes with expression down-regulated by BRD0705 are ranked based on the increasing order of fold change of expression (from low to high). The 55 genes with expression up-regulated by BRD0705 are ranked based on the decreasing order of fold change of expression (from high to low).

Columns 4-5 presents the average  $\log_2(\text{FPKM})$  expression across samples treated with DMSO (Control) and BRD0705. Columns 6-10 present the Fold Change, Signal to Noise Ratio (SNR), P-value and FDR scores for  $\log_2(\text{FPKM})$  expression in BRD0705 treated samples vs control. Columns 11-13 present the trend of the change in expression (down = DN, up = UP, unchanged = 0) induced by the treatment with BRD0705, BRD0320 and BRD3731.

| #                                                                 | GeneID | Gene Symbol  | U937.av.log2FPKM.Ctr | U937.av.log2FPKM.BRD0705 | U937.log2FC.BRD0705.vs.Ctr | U937.SNR.BRD0705.vs.Ctr | U937.Pvalue.BRD0705.vs.Ctr | U937.FDR.BRD0705.vs.Ctr | Trend U937.BRD0705.vs.Ctr | Trend U937.BRD0320.vs.Ctr | Trend U937.BRD3731.vs.Ctr |
|-------------------------------------------------------------------|--------|--------------|----------------------|--------------------------|----------------------------|-------------------------|----------------------------|-------------------------|---------------------------|---------------------------|---------------------------|
| <b>Genes with expression down-regulated by BRD0705 vs Control</b> |        |              |                      |                          |                            |                         |                            |                         |                           |                           |                           |
| 1                                                                 | 30394  | JA760600     | 4.46                 | 1.12                     | -3.34                      | -1.44                   | 0.01                       | 0.01                    | DN                        | DN                        | 0                         |
| 2                                                                 | 9782   | DQ599965     | 3.97                 | 0.66                     | -3.31                      | -1.74                   | 0.00                       | 0.01                    | DN                        | DN                        | 0                         |
| 3                                                                 | 6148   | P27_CRE      | 1.89                 | 0.00                     | -1.89                      | -1.15                   | 0.04                       | 0.05                    | DN                        | DN                        | 0                         |
| 4                                                                 | 11964  | AB062083     | 2.64                 | 0.84                     | -1.81                      | -0.90                   | 0.04                       | 0.05                    | DN                        | DN                        | 0                         |
| 5                                                                 | 30117  | DQ571464     | 2.62                 | 0.84                     | -1.78                      | -0.45                   | 0.05                       | 0.05                    | DN                        | 0                         | 0                         |
| 6                                                                 | 30588  | U4           | 1.78                 | 0.00                     | -1.78                      | -4.37                   | 0.00                       | 0.00                    | DN                        | DN                        | 0                         |
| 7                                                                 | 9307   | KIAA0855     | 3.09                 | 1.48                     | -1.60                      | -0.59                   | 0.05                       | 0.04                    | DN                        | DN                        | 0                         |
| 8                                                                 | 12477  | SNORD42A     | 1.60                 | 0.00                     | -1.60                      | -3.71                   | 0.00                       | 0.01                    | DN                        | DN                        | 0                         |
| 9                                                                 | 10640  | DQ596816     | 2.27                 | 0.71                     | -1.56                      | -0.44                   | 0.05                       | 0.05                    | DN                        | 0                         | 0                         |
| 10                                                                | 11144  | DQ598724     | 1.51                 | 0.00                     | -1.51                      | -1.03                   | 0.05                       | 0.04                    | DN                        | 0                         | 0                         |
| 11                                                                | 2609   | DQ599872     | 1.98                 | 0.56                     | -1.42                      | -1.01                   | 0.01                       | 0.01                    | DN                        | 0                         | 0                         |
| 12                                                                | 17070  | MIR4784      | 1.42                 | 0.00                     | -1.42                      | -4.06                   | 0.00                       | 0.01                    | DN                        | 0                         | 0                         |
| 13                                                                | 23625  | LOC100133331 | 3.37                 | 1.95                     | -1.41                      | -1.42                   | 0.01                       | 0.01                    | DN                        | DN                        | 0                         |
| 14                                                                | 6605   | SNORD59A     | 2.00                 | 0.72                     | -1.28                      | -1.53                   | 0.00                       | 0.01                    | DN                        | 0                         | 0                         |
| 15                                                                | 3867   | PDCD4        | 5.37                 | 4.13                     | -1.25                      | -7.05                   | 0.00                       | 0.00                    | DN                        | DN                        | DN                        |
| 16                                                                | 21066  | KLHL24       | 2.28                 | 1.04                     | -1.24                      | -7.88                   | 0.00                       | 0.00                    | DN                        | DN                        | 0                         |
| 17                                                                | 4065   | AL137655     | 2.69                 | 1.49                     | -1.20                      | -1.06                   | 0.00                       | 0.00                    | DN                        | DN                        | 0                         |
| 18                                                                | 9509   | BX537481     | 1.90                 | 0.73                     | -1.17                      | -1.13                   | 0.00                       | 0.01                    | DN                        | DN                        | 0                         |
| 19                                                                | 15511  | SNORD35A     | 1.63                 | 0.47                     | -1.16                      | -1.07                   | 0.00                       | 0.00                    | DN                        | 0                         | 0                         |
| 20                                                                | 28472  | PCMTD1       | 3.17                 | 2.01                     | -1.16                      | -4.03                   | 0.01                       | 0.00                    | DN                        | DN                        | 0                         |

| #  | GeneID | Gene Symbol  | U937.av.log2FPKM.Ctr | U937.av.log2FPKM.BRD0705 | U937.log2FC.BRD0705.vs.Ctr | U937.SNR.BRD0705.vs.Ctr | U937.Pvalue.BRD0705.vs.Ctr | U937.FDR.BRD0705.vs.Ctr | Trend U937.BRD0705.vs.Ctr | Trend U937.BRD0320.vs.Ctr | Trend U937.BRD3731.vs.Ctr |
|----|--------|--------------|----------------------|--------------------------|----------------------------|-------------------------|----------------------------|-------------------------|---------------------------|---------------------------|---------------------------|
| 21 | 2178   | SNORD77      | 3.27                 | 2.17                     | -1.09                      | -1.45                   | 0.00                       | 0.01                    | DN                        | 0                         | UP                        |
| 22 | 24842  | PNRC1        | 3.58                 | 2.60                     | -0.98                      | -2.71                   | 0.00                       | 0.01                    | DN                        | DN                        | DN                        |
| 23 | 20672  | ABTB1        | 1.60                 | 0.64                     | -0.96                      | -3.66                   | 0.01                       | 0.01                    | DN                        | DN                        | DN                        |
| 24 | 18609  | MIR647       | 2.08                 | 1.13                     | -0.95                      | -1.62                   | 0.01                       | 0.00                    | DN                        | 0                         | 0                         |
| 25 | 27552  | PIK3CG       | 4.45                 | 3.50                     | -0.95                      | -5.12                   | 0.00                       | 0.01                    | DN                        | DN                        | DN                        |
| 26 | 18434  | SNORD12B     | 1.60                 | 0.65                     | -0.94                      | -1.02                   | 0.01                       | 0.01                    | DN                        | 0                         | 0                         |
| 27 | 9203   | FLJ00278     | 2.87                 | 1.94                     | -0.93                      | -0.82                   | 0.01                       | 0.01                    | DN                        | DN                        | 0                         |
| 28 | 27554  | HBP1         | 3.53                 | 2.60                     | -0.93                      | -7.97                   | 0.00                       | 0.00                    | DN                        | DN                        | 0                         |
| 29 | 15590  | SNORD88A     | 1.46                 | 0.53                     | -0.92                      | -1.44                   | 0.01                       | 0.00                    | DN                        | 0                         | 0                         |
| 30 | 7021   | SNORD50      | 3.32                 | 2.45                     | -0.86                      | -2.64                   | 0.00                       | 0.01                    | DN                        | 0                         | 0                         |
| 31 | 11873  | AK302511     | 3.68                 | 2.82                     | -0.86                      | -1.11                   | 0.01                       | 0.01                    | DN                        | DN                        | 0                         |
| 32 | 25134  | CCDC28A      | 3.73                 | 2.87                     | -0.86                      | -2.96                   | 0.00                       | 0.00                    | DN                        | DN                        | DN                        |
| 33 | 28320  | BNIP3L       | 3.98                 | 3.12                     | -0.86                      | -4.03                   | 0.01                       | 0.00                    | DN                        | DN                        | DN                        |
| 34 | 12973  | DQ588732     | 1.04                 | 0.20                     | -0.84                      | -1.18                   | 0.01                       | 0.00                    | DN                        | 0                         | 0                         |
| 35 | 21758  | ART3         | 3.11                 | 2.26                     | -0.84                      | -3.31                   | 0.01                       | 0.01                    | DN                        | DN                        | 0                         |
| 36 | 10993  | LOC100288332 | 4.09                 | 3.27                     | -0.82                      | -0.98                   | 0.00                       | 0.00                    | DN                        | 0                         | 0                         |
| 37 | 21773  | CCNG2        | 2.57                 | 1.75                     | -0.82                      | -3.86                   | 0.00                       | 0.00                    | DN                        | DN                        | 0                         |
| 38 | 5987   | ING4         | 2.97                 | 2.16                     | -0.81                      | -7.23                   | 0.00                       | 0.00                    | DN                        | DN                        | 0                         |
| 39 | 8618   | ATXN3        | 3.24                 | 2.43                     | -0.81                      | -4.51                   | 0.00                       | 0.01                    | DN                        | DN                        | DN                        |
| 40 | 27553  | PRKAR2B      | 3.26                 | 2.46                     | -0.80                      | -6.29                   | 0.01                       | 0.00                    | DN                        | DN                        | DN                        |
| 41 | 1001   | AK298300     | 2.30                 | 1.52                     | -0.78                      | -1.12                   | 0.00                       | 0.01                    | DN                        | DN                        | 0                         |
| 42 | 13653  | AX721193     | 1.59                 | 0.81                     | -0.78                      | -1.38                   | 0.01                       | 0.01                    | DN                        | 0                         | 0                         |
| 43 | 3341   | TET1         | 1.30                 | 0.53                     | -0.77                      | -1.42                   | 0.01                       | 0.01                    | DN                        | DN                        | 0                         |
| 44 | 19985  | WDR48        | 4.22                 | 3.44                     | -0.77                      | -10.79                  | 0.00                       | 0.01                    | DN                        | DN                        | DN                        |
| 45 | 4076   | IFITM1       | 3.42                 | 2.66                     | -0.76                      | -3.32                   | 0.00                       | 0.00                    | DN                        | DN                        | DN                        |
| 46 | 6352   | SNORA34      | 0.75                 | 0.00                     | -0.75                      | -3.80                   | 0.01                       | 0.01                    | DN                        | DN                        | 0                         |
| 47 | 15198  | CEACAM6      | 1.16                 | 0.41                     | -0.75                      | -2.26                   | 0.01                       | 0.01                    | DN                        | DN                        | DN                        |
| 48 | 18206  | TP53INP2     | 3.87                 | 3.12                     | -0.75                      | -3.50                   | 0.00                       | 0.01                    | DN                        | DN                        | DN                        |
| 49 | 22931  | ST8SIA4      | 3.07                 | 2.32                     | -0.75                      | -8.80                   | 0.01                       | 0.01                    | DN                        | DN                        | DN                        |
| 50 | 28849  | DEPTOR       | 2.51                 | 1.77                     | -0.74                      | -2.13                   | 0.00                       | 0.00                    | DN                        | DN                        | DN                        |
| 51 | 1474   | PFN1P2       | 1.68                 | 0.94                     | -0.73                      | -0.94                   | 0.00                       | 0.01                    | DN                        | DN                        | 0                         |
| 52 | 4250   | TRIM22       | 2.53                 | 1.80                     | -0.73                      | -3.63                   | 0.00                       | 0.00                    | DN                        | DN                        | 0                         |
| 53 | 18514  | AK093534     | 2.30                 | 1.58                     | -0.73                      | -1.52                   | 0.00                       | 0.00                    | DN                        | 0                         | 0                         |
| 54 | 28477  | RB1CC1       | 4.14                 | 3.41                     | -0.73                      | -9.77                   | 0.01                       | 0.01                    | DN                        | DN                        | DN                        |
| 55 | 6526   | NFE2         | 2.98                 | 2.27                     | -0.72                      | -1.82                   | 0.01                       | 0.00                    | DN                        | DN                        | DN                        |
| 56 | 10899  | UBALD1       | 4.36                 | 3.64                     | -0.72                      | -5.05                   | 0.00                       | 0.01                    | DN                        | DN                        | DN                        |
| 57 | 15195  | CEACAM4      | 2.78                 | 2.06                     | -0.72                      | -3.13                   | 0.01                       | 0.00                    | DN                        | DN                        | DN                        |

| #  | GeneID | Gene Symbol                | U937.av.log2FPKM.Ctr | U937.av.log2FPKM.BRD0705 | U937.log2FC.BRD0705.vs.Ctr | U937.SNR.BRD0705.vs.Ctr | U937.Pvalue.BRD0705.vs.Ctr | U937.FDR.BRD0705.vs.Ctr | Trend U937.BRD0705.vs.Ctr | Trend U937.BRD0320.vs.Ctr | Trend U937.BRD3731.vs.Ctr |
|----|--------|----------------------------|----------------------|--------------------------|----------------------------|-------------------------|----------------------------|-------------------------|---------------------------|---------------------------|---------------------------|
| 58 | 19133  | P2RX6P                     | 0.72                 | 0.00                     | -0.72                      | -3.81                   | 0.00                       | 0.00                    | DN                        | DN                        | 0                         |
| 59 | 21300  | MXD4                       | 2.36                 | 1.64                     | -0.72                      | -1.80                   | 0.00                       | 0.01                    | DN                        | DN                        | DN                        |
| 60 | 21788  | ANTXR2                     | 4.74                 | 4.02                     | -0.72                      | -2.70                   | 0.01                       | 0.01                    | DN                        | DN                        | DN                        |
| 61 | 29     | LOC100130417               | 1.22                 | 0.51                     | -0.71                      | -1.41                   | 0.01                       | 0.00                    | DN                        | 0                         | 0                         |
| 62 | 11872  | AX747598                   | 2.87                 | 2.15                     | -0.71                      | -1.87                   | 0.01                       | 0.00                    | DN                        | DN                        | 0                         |
| 63 | 23181  | EIF4EBP3                   | 3.03                 | 2.32                     | -0.71                      | -1.98                   | 0.01                       | 0.00                    | DN                        | DN                        | 0                         |
| 64 | 1793   | PBXIP1                     | 3.10                 | 2.40                     | -0.70                      | -5.70                   | 0.00                       | 0.01                    | DN                        | DN                        | DN                        |
| 65 | 12356  | LGALS9B                    | 0.82                 | 0.11                     | -0.70                      | -6.03                   | 0.00                       | 0.01                    | DN                        | DN                        | 0                         |
| 66 | 4471   | endogenous retrovirus ERV9 | 1.78                 | 1.10                     | -0.69                      | -1.22                   | 0.00                       | 0.00                    | DN                        | DN                        | 0                         |
| 67 | 8190   | MIS18BP1                   | 5.23                 | 4.54                     | -0.69                      | -10.95                  | 0.00                       | 0.00                    | DN                        | DN                        | DN                        |
| 68 | 13178  | YPEL2                      | 2.43                 | 1.74                     | -0.69                      | -5.24                   | 0.00                       | 0.01                    | DN                        | DN                        | 0                         |
| 69 | 17383  | SLC40A1                    | 2.01                 | 1.32                     | -0.69                      | -2.04                   | 0.01                       | 0.00                    | DN                        | DN                        | 0                         |
| 70 | 23158  | PAIP2                      | 5.82                 | 5.14                     | -0.68                      | -4.17                   | 0.00                       | 0.01                    | DN                        | DN                        | DN                        |
| 71 | 8134   | EAPP                       | 4.13                 | 3.47                     | -0.67                      | -2.90                   | 0.01                       | 0.00                    | DN                        | DN                        | DN                        |
| 72 | 22163  | TLR2                       | 3.07                 | 2.40                     | -0.67                      | -2.35                   | 0.01                       | 0.01                    | DN                        | DN                        | 0                         |
| 73 | 643    | AGO4                       | 3.36                 | 2.70                     | -0.66                      | -5.88                   | 0.00                       | 0.01                    | DN                        | DN                        | 0                         |
| 74 | 11200  | SNX29P2                    | 3.19                 | 2.53                     | -0.66                      | -1.01                   | 0.00                       | 0.00                    | DN                        | DN                        | 0                         |
| 75 | 18479  | FAM210B                    | 3.65                 | 2.99                     | -0.66                      | -11.11                  | 0.00                       | 0.01                    | DN                        | DN                        | 0                         |
| 76 | 26816  | C7orf41                    | 2.77                 | 2.11                     | -0.66                      | -2.72                   | 0.00                       | 0.00                    | DN                        | DN                        | 0                         |
| 77 | 4064   | LOC100133161               | 3.48                 | 2.82                     | -0.65                      | -0.78                   | 0.01                       | 0.00                    | DN                        | DN                        | 0                         |
| 78 | 15894  | ZNF530                     | 2.34                 | 1.69                     | -0.65                      | -0.97                   | 0.00                       | 0.00                    | DN                        | 0                         | 0                         |
| 79 | 27203  | GTF2IP1                    | 4.12                 | 3.47                     | -0.65                      | -1.72                   | 0.01                       | 0.00                    | DN                        | DN                        | 0                         |
| 80 | 27411  | MIR25                      | 2.50                 | 1.86                     | -0.65                      | -1.12                   | 0.00                       | 0.01                    | DN                        | DN                        | 0                         |
| 81 | 6500   | CALCOCO1                   | 2.18                 | 1.54                     | -0.64                      | -14.75                  | 0.01                       | 0.00                    | DN                        | DN                        | DN                        |
| 82 | 10266  | AK055981                   | 2.39                 | 1.76                     | -0.64                      | -2.97                   | 0.00                       | 0.01                    | DN                        | DN                        | 0                         |
| 83 | 13428  | UBALD2                     | 4.09                 | 3.45                     | -0.64                      | -6.84                   | 0.00                       | 0.00                    | DN                        | DN                        | DN                        |
| 84 | 16690  | AK057596                   | 3.24                 | 2.60                     | -0.64                      | -0.88                   | 0.00                       | 0.01                    | DN                        | DN                        | 0                         |
| 85 | 17240  | DHRS9                      | 2.64                 | 2.00                     | -0.64                      | -4.37                   | 0.01                       | 0.01                    | DN                        | DN                        | 0                         |
| 86 | 21244  | FAM157A                    | 2.86                 | 2.22                     | -0.64                      | -1.42                   | 0.00                       | 0.00                    | DN                        | DN                        | 0                         |
| 87 | 1781   | SNORA58                    | 2.11                 | 1.48                     | -0.63                      | -1.60                   | 0.00                       | 0.01                    | DN                        | 0                         | 0                         |
| 88 | 10743  | SPSB3                      | 3.51                 | 2.87                     | -0.63                      | -5.31                   | 0.00                       | 0.01                    | DN                        | DN                        | DN                        |
| 89 | 13749  | CHMP1B                     | 4.14                 | 3.51                     | -0.63                      | -4.87                   | 0.01                       | 0.00                    | DN                        | DN                        | DN                        |
| 90 | 18622  | PCMTD2                     | 3.34                 | 2.71                     | -0.63                      | -6.24                   | 0.00                       | 0.01                    | DN                        | DN                        | 0                         |
| 91 | 28082  | AK056623                   | 1.63                 | 1.01                     | -0.63                      | -3.81                   | 0.01                       | 0.00                    | DN                        | DN                        | 0                         |
| 92 | 1462   | AL050141                   | 1.56                 | 0.94                     | -0.62                      | -1.11                   | 0.00                       | 0.00                    | DN                        | 0                         | 0                         |
| 93 | 9632   | CCPG1                      | 6.50                 | 5.88                     | -0.62                      | -5.55                   | 0.01                       | 0.01                    | DN                        | DN                        | 0                         |
| 94 | 12309  | USP32P2                    | 1.31                 | 0.69                     | -0.62                      | -1.65                   | 0.01                       | 0.00                    | DN                        | DN                        | 0                         |



| #   | GeneID | Gene Symbol | U937.av.log2FPKM.Ctr | U937.av.log2FPKM.BRD0705 | U937.log2FC.BRD0705.vs.Ctr | U937.SNR.BRD0705.vs.Ctr | U937.Pvalue.BRD0705.vs.Ctr | U937.FDR.BRD0705.vs.Ctr | Trend U937.BRD0705.vs.Ctr | Trend U937.BRD0320.vs.Ctr | Trend U937.BRD3731.vs.Ctr |
|-----|--------|-------------|----------------------|--------------------------|----------------------------|-------------------------|----------------------------|-------------------------|---------------------------|---------------------------|---------------------------|
| 95  | 20367  | FOXP1       | 3.13                 | 2.51                     | -0.62                      | -2.81                   | 0.01                       | 0.01                    | DN                        | DN                        | 0                         |
| 96  | 3706   | FRAT1       | 2.59                 | 1.99                     | -0.61                      | -3.39                   | 0.01                       | 0.01                    | DN                        | DN                        | DN                        |
| 97  | 10881  | NLRC3       | 2.68                 | 2.07                     | -0.61                      | -6.48                   | 0.01                       | 0.01                    | DN                        | DN                        | DN                        |
| 98  | 12579  | RAD51D      | 1.33                 | 0.72                     | -0.61                      | -1.28                   | 0.01                       | 0.01                    | DN                        | 0                         | 0                         |
| 99  | 13112  | MBTD1       | 3.30                 | 2.69                     | -0.61                      | -4.30                   | 0.01                       | 0.00                    | DN                        | DN                        | 0                         |
| 100 | 21337  | CYTL1       | 1.88                 | 1.27                     | -0.61                      | -2.04                   | 0.00                       | 0.00                    | DN                        | 0                         | 0                         |
| 101 | 593    | TSSK3       | 2.09                 | 1.49                     | -0.60                      | -2.17                   | 0.00                       | 0.00                    | DN                        | DN                        | 0                         |
| 102 | 692    | MACF1       | 4.37                 | 3.77                     | -0.60                      | -1.28                   | 0.01                       | 0.00                    | DN                        | DN                        | 0                         |
| 103 | 16367  | AK311113    | 2.56                 | 1.96                     | -0.60                      | -0.82                   | 0.00                       | 0.00                    | DN                        | 0                         | 0                         |
| 104 | 21529  | UGDH-AS1    | 3.52                 | 2.92                     | -0.60                      | -1.16                   | 0.01                       | 0.01                    | DN                        | 0                         | 0                         |
| 105 | 22449  | ROPN1L      | 2.09                 | 1.49                     | -0.60                      | -2.32                   | 0.01                       | 0.00                    | DN                        | DN                        | DN                        |
| 106 | 997    | PDE4B       | 2.57                 | 1.99                     | -0.59                      | -3.02                   | 0.00                       | 0.00                    | DN                        | DN                        | 0                         |
| 107 | 1191   | RWDD3       | 3.00                 | 2.41                     | -0.59                      | -2.27                   | 0.00                       | 0.00                    | DN                        | DN                        | 0                         |
| 108 | 9634   | FLJ27352    | 1.90                 | 1.31                     | -0.59                      | -1.57                   | 0.00                       | 0.01                    | DN                        | DN                        | 0                         |
| 109 | 13967  | RAB27B      | 4.14                 | 3.55                     | -0.59                      | -8.02                   | 0.00                       | 0.01                    | DN                        | DN                        | 0                         |
| 110 | 20021  | NKTR        | 4.11                 | 3.52                     | -0.59                      | -1.41                   | 0.00                       | 0.01                    | DN                        | DN                        | 0                         |
| 111 | 20067  | LZTFL1      | 3.73                 | 3.14                     | -0.59                      | -4.12                   | 0.01                       | 0.00                    | DN                        | DN                        | 0                         |
| 112 | 22827  | JMY         | 1.13                 | 0.53                     | -0.59                      | -3.22                   | 0.00                       | 0.00                    | DN                        | DN                        | 0                         |
| 113 | 31780  | CD24        | 2.13                 | 1.53                     | -0.59                      | -2.11                   | 0.00                       | 0.00                    | DN                        | DN                        | 0                         |
| 114 | 1516   | NBPF24      | 1.95                 | 1.37                     | -0.58                      | -1.74                   | 0.00                       | 0.01                    | DN                        | DN                        | 0                         |
| 115 | 9332   | BC037952    | 3.70                 | 3.12                     | -0.58                      | -0.85                   | 0.00                       | 0.00                    | DN                        | DN                        | 0                         |
| 116 | 10729  | CCDC154     | 2.18                 | 1.60                     | -0.58                      | -1.56                   | 0.01                       | 0.00                    | DN                        | DN                        | 0                         |
| 117 | 15190  | B3GNT8      | 2.75                 | 2.17                     | -0.58                      | -4.29                   | 0.00                       | 0.01                    | DN                        | DN                        | DN                        |
| 118 | 17478  | FAM117B     | 1.91                 | 1.33                     | -0.58                      | -6.27                   | 0.00                       | 0.00                    | DN                        | DN                        | 0                         |
| 119 | 20601  | GOLGB1      | 2.90                 | 2.32                     | -0.58                      | -2.73                   | 0.01                       | 0.01                    | DN                        | DN                        | 0                         |
| 120 | 29365  | TPM2        | 3.60                 | 3.02                     | -0.58                      | -1.14                   | 0.00                       | 0.00                    | DN                        | DN                        | 0                         |
| 121 | 29502  | DQ594366    | 4.12                 | 3.55                     | -0.58                      | -0.77                   | 0.01                       | 0.01                    | DN                        | DN                        | 0                         |
| 122 | 448    | NIPAL3      | 2.32                 | 1.75                     | -0.57                      | -3.69                   | 0.00                       | 0.01                    | DN                        | DN                        | 0                         |
| 123 | 3896   | ABLIM1      | 2.47                 | 1.90                     | -0.57                      | -3.87                   | 0.00                       | 0.01                    | DN                        | DN                        | 0                         |
| 124 | 9623   | FAM214A     | 1.84                 | 1.27                     | -0.57                      | -1.97                   | 0.01                       | 0.01                    | DN                        | DN                        | 0                         |
| 125 | 19287  | CCDC117     | 3.96                 | 3.39                     | -0.57                      | -5.60                   | 0.00                       | 0.01                    | DN                        | DN                        | 0                         |
| 126 | 21432  | MGC4836     | 3.63                 | 3.06                     | -0.57                      | -1.06                   | 0.01                       | 0.00                    | DN                        | DN                        | 0                         |
| 127 | 24274  | RXRΒ        | 4.57                 | 4.00                     | -0.57                      | -2.37                   | 0.01                       | 0.00                    | DN                        | DN                        | 0                         |
| 128 | 6096   | CLEC12B     | 3.24                 | 2.67                     | -0.56                      | -2.38                   | 0.00                       | 0.00                    | DN                        | DN                        | 0                         |
| 129 | 6224   | LRMP        | 2.85                 | 2.29                     | -0.56                      | -4.14                   | 0.00                       | 0.01                    | DN                        | DN                        | 0                         |
| 130 | 8505   | SPTLC2      | 4.07                 | 3.51                     | -0.56                      | -7.08                   | 0.00                       | 0.01                    | DN                        | DN                        | 0                         |
| 131 | 9012   | GOLGA8S     | 3.26                 | 2.70                     | -0.56                      | -2.88                   | 0.01                       | 0.01                    | DN                        | DN                        | UP                        |

| #   | GeneID | Gene Symbol | U937.av.log2FPKM.Ctr | U937.av.log2FPKM.BRD0705 | U937.log2FC.BRD0705.vs.Ctr | U937.SNR.BRD0705.vs.Ctr | U937.Pvalue.BRD0705.vs.Ctr | U937.FDR.BRD0705.vs.Ctr | Trend U937.BRD0705.vs.Ctr | Trend U937.BRD0320.vs.Ctr | Trend U937.BRD3731.vs.Ctr |
|-----|--------|-------------|----------------------|--------------------------|----------------------------|-------------------------|----------------------------|-------------------------|---------------------------|---------------------------|---------------------------|
| 132 | 11714  | NUDT7       | 2.78                 | 2.22                     | -0.56                      | -2.14                   | 0.00                       | 0.00                    | DN                        | DN                        | 0                         |
| 133 | 19903  | NR1D2       | 3.11                 | 2.54                     | -0.56                      | -2.83                   | 0.01                       | 0.01                    | DN                        | DN                        | 0                         |
| 134 | 23864  | BTN3A1      | 1.61                 | 1.04                     | -0.56                      | -2.40                   | 0.00                       | 0.01                    | DN                        | DN                        | 0                         |
| 135 | 28017  | NUB1        | 4.79                 | 4.23                     | -0.56                      | -2.39                   | 0.01                       | 0.01                    | DN                        | DN                        | DN                        |
| 136 | 30143  | ZER1        | 2.16                 | 1.60                     | -0.56                      | -4.02                   | 0.01                       | 0.00                    | DN                        | DN                        | DN                        |
| 137 | 13877  | KIAA1328    | 3.25                 | 2.70                     | -0.55                      | -1.13                   | 0.01                       | 0.01                    | DN                        | DN                        | 0                         |
| 138 | 15782  | KIR3DX1     | 1.23                 | 0.68                     | -0.55                      | -2.81                   | 0.00                       | 0.00                    | DN                        | DN                        | 0                         |
| 139 | 19165  | YPEL1       | 1.33                 | 0.78                     | -0.55                      | -2.79                   | 0.01                       | 0.00                    | DN                        | DN                        | 0                         |
| 140 | 26587  | GPR146      | 1.42                 | 0.87                     | -0.55                      | -3.30                   | 0.00                       | 0.00                    | DN                        | DN                        | 0                         |
| 141 | 28385  | RNF122      | 1.83                 | 1.28                     | -0.55                      | -1.40                   | 0.00                       | 0.01                    | DN                        | DN                        | 0                         |
| 142 | 29717  | AUH         | 2.71                 | 2.17                     | -0.55                      | -1.59                   | 0.00                       | 0.01                    | DN                        | DN                        | DN                        |
| 143 | 31231  | MORC4       | 4.69                 | 4.14                     | -0.55                      | -1.18                   | 0.01                       | 0.01                    | DN                        | DN                        | 0                         |
| 144 | 381    | PINK1       | 3.68                 | 3.14                     | -0.54                      | -5.64                   | 0.00                       | 0.01                    | DN                        | DN                        | DN                        |
| 145 | 507    | WDC1        | 3.71                 | 3.17                     | -0.54                      | -9.31                   | 0.00                       | 0.00                    | DN                        | DN                        | DN                        |
| 146 | 1816   | THBS3       | 1.89                 | 1.35                     | -0.54                      | -1.52                   | 0.01                       | 0.00                    | DN                        | DN                        | 0                         |
| 147 | 6370   | RHEBL1      | 2.51                 | 1.96                     | -0.54                      | -1.20                   | 0.00                       | 0.00                    | DN                        | DN                        | 0                         |
| 148 | 7934   | ANG         | 0.98                 | 0.45                     | -0.54                      | -1.15                   | 0.01                       | 0.01                    | DN                        | 0                         | 0                         |
| 149 | 8368   | TMEM229B    | 3.51                 | 2.97                     | -0.54                      | -1.25                   | 0.00                       | 0.00                    | DN                        | DN                        | 0                         |
| 150 | 8509   | C14orf178   | 0.77                 | 0.23                     | -0.54                      | -1.68                   | 0.00                       | 0.00                    | DN                        | 0                         | 0                         |
| 151 | 10951  | RMI2        | 4.73                 | 4.19                     | -0.54                      | -8.84                   | 0.01                       | 0.01                    | DN                        | DN                        | 0                         |
| 152 | 22869  | AK023417    | 1.28                 | 0.74                     | -0.54                      | -0.98                   | 0.00                       | 0.00                    | DN                        | 0                         | 0                         |
| 153 | 27892  | FAM115C     | 0.91                 | 0.37                     | -0.54                      | -1.90                   | 0.00                       | 0.00                    | DN                        | 0                         | 0                         |
| 154 | 28352  | DQ595103    | 2.55                 | 2.02                     | -0.54                      | -1.09                   | 0.01                       | 0.00                    | DN                        | 0                         | 0                         |
| 155 | 30993  | mir-223     | 3.60                 | 3.06                     | -0.54                      | -1.27                   | 0.01                       | 0.00                    | DN                        | DN                        | 0                         |
| 156 | 9144   | WHAMMP2     | 2.82                 | 2.29                     | -0.53                      | -1.70                   | 0.00                       | 0.01                    | DN                        | DN                        | 0                         |
| 157 | 10192  | DQ586822    | 1.33                 | 0.80                     | -0.53                      | -1.35                   | 0.00                       | 0.01                    | DN                        | DN                        | 0                         |
| 158 | 16628  | LOC285074   | 2.66                 | 2.13                     | -0.53                      | -1.10                   | 0.00                       | 0.00                    | DN                        | DN                        | 0                         |
| 159 | 19738  | CRBN        | 4.30                 | 3.77                     | -0.53                      | -2.53                   | 0.00                       | 0.00                    | DN                        | DN                        | 0                         |
| 160 | 20456  | TMEM45A     | 3.46                 | 2.93                     | -0.53                      | -1.05                   | 0.01                       | 0.01                    | DN                        | DN                        | 0                         |
| 161 | 22021  | KIAA1109    | 2.38                 | 1.85                     | -0.53                      | -1.59                   | 0.01                       | 0.01                    | DN                        | 0                         | 0                         |
| 162 | 25138  | HECA        | 3.40                 | 2.87                     | -0.53                      | -4.80                   | 0.00                       | 0.00                    | DN                        | DN                        | 0                         |
| 163 | 27185  | LAT2        | 6.25                 | 5.72                     | -0.53                      | -6.35                   | 0.01                       | 0.00                    | DN                        | DN                        | DN                        |
| 164 | 6751   | TBC1D15     | 4.39                 | 3.86                     | -0.53                      | -6.53                   | 0.00                       | 0.01                    | DN                        | DN                        | 0                         |
| 165 | 4923   | MS4A7       | 3.48                 | 2.95                     | -0.53                      | -2.77                   | 0.01                       | 0.00                    | DN                        | DN                        | 0                         |
| 166 | 3899   | FAM160B1    | 3.10                 | 2.57                     | -0.53                      | -3.48                   | 0.00                       | 0.00                    | DN                        | DN                        | 0                         |
| 167 | 2643   | CABC1       | 5.50                 | 4.96                     | -0.53                      | -4.23                   | 0.01                       | 0.01                    | DN                        | DN                        | 0                         |
| 168 | 2547   | CENPF       | 5.65                 | 5.12                     | -0.53                      | -2.26                   | 0.00                       | 0.00                    | DN                        | DN                        | 0                         |

| #   | GeneID | Gene Symbol | U937.av.log2FPKM.Ctr | U937.av.log2FPKM.BRD0705 | U937.log2FC.BRD0705.vs.Ctr | U937.SNR.BRD0705.vs.Ctr | U937.Pvalue.BRD0705.vs.Ctr | U937.FDR.BRD0705.vs.Ctr | Trend U937.BRD0705.vs.Ctr | Trend U937.BRD0320.vs.Ctr | Trend U937.BRD3731.vs.Ctr |
|-----|--------|-------------|----------------------|--------------------------|----------------------------|-------------------------|----------------------------|-------------------------|---------------------------|---------------------------|---------------------------|
| 169 | 2416   | ZBED6       | 2.16                 | 1.63                     | -0.53                      | -1.44                   | 0.00                       | 0.00                    | DN                        | DN                        | 0                         |
| 170 | 633    | BX537811    | 3.96                 | 3.43                     | -0.53                      | -0.80                   | 0.00                       | 0.00                    | DN                        | DN                        | 0                         |
| 171 | 383    | KIF17       | 2.30                 | 1.77                     | -0.53                      | -2.10                   | 0.00                       | 0.00                    | DN                        | DN                        | 0                         |
| 172 | 21634  | AASDH       | 2.24                 | 1.72                     | -0.52                      | -5.19                   | 0.00                       | 0.01                    | DN                        | DN                        | 0                         |
| 173 | 13209  | BCAS3       | 1.47                 | 0.95                     | -0.52                      | -2.12                   | 0.00                       | 0.01                    | DN                        | DN                        | DN                        |
| 174 | 12727  | FBXL20      | 1.40                 | 0.88                     | -0.52                      | -4.08                   | 0.01                       | 0.00                    | DN                        | DN                        | 0                         |
| 175 | 7430   | CCNA1       | 6.07                 | 5.54                     | -0.52                      | -4.70                   | 0.00                       | 0.01                    | DN                        | DN                        | 0                         |
| 176 | 7146   | LOC338799   | 2.11                 | 1.59                     | -0.52                      | -1.10                   | 0.01                       | 0.01                    | DN                        | DN                        | 0                         |
| 177 | 6650   | TSPAN31     | 1.83                 | 1.31                     | -0.52                      | -3.21                   | 0.00                       | 0.00                    | DN                        | 0                         | 0                         |
| 178 | 5562   | ATM         | 3.22                 | 2.69                     | -0.52                      | -2.33                   | 0.00                       | 0.01                    | DN                        | DN                        | 0                         |
| 179 | 5111   | NEAT1       | 3.30                 | 2.78                     | -0.52                      | -1.19                   | 0.01                       | 0.00                    | DN                        | 0                         | 0                         |
| 180 | 2387   | KDM5B       | 4.76                 | 4.24                     | -0.52                      | -3.40                   | 0.01                       | 0.01                    | DN                        | DN                        | 0                         |
| 181 | 25009  | C6orf170    | 1.27                 | 0.75                     | -0.51                      | -1.81                   | 0.00                       | 0.00                    | DN                        | 0                         | 0                         |
| 182 | 20818  | XRN1        | 2.57                 | 2.06                     | -0.51                      | -2.83                   | 0.00                       | 0.00                    | DN                        | DN                        | 0                         |
| 183 | 18461  | ATP9A       | 2.66                 | 2.15                     | -0.51                      | -3.93                   | 0.01                       | 0.01                    | DN                        | DN                        | 0                         |
| 184 | 17284  | CIR1        | 4.64                 | 4.13                     | -0.51                      | -3.57                   | 0.00                       | 0.00                    | DN                        | DN                        | DN                        |
| 185 | 11027  | SMG1        | 3.61                 | 3.10                     | -0.51                      | -1.34                   | 0.01                       | 0.01                    | DN                        | DN                        | 0                         |
| 186 | 10146  | UBE2Q2P2    | 1.52                 | 1.00                     | -0.51                      | -1.19                   | 0.01                       | 0.01                    | DN                        | 0                         | 0                         |
| 187 | 8216   | SOS2        | 3.38                 | 2.87                     | -0.51                      | -2.08                   | 0.01                       | 0.00                    | DN                        | DN                        | DN                        |
| 188 | 8161   | MIPOL1      | 2.08                 | 1.57                     | -0.51                      | -1.06                   | 0.01                       | 0.01                    | DN                        | DN                        | 0                         |
| 189 | 6324   | SLC38A2     | 5.14                 | 4.63                     | -0.51                      | -8.05                   | 0.01                       | 0.00                    | DN                        | DN                        | 0                         |
| 190 | 1771   | CREB3L4     | 2.71                 | 2.20                     | -0.51                      | -2.70                   | 0.00                       | 0.00                    | DN                        | DN                        | 0                         |
| 191 | 28     | AK056486    | 1.83                 | 1.32                     | -0.51                      | -0.87                   | 0.01                       | 0.00                    | DN                        | DN                        | 0                         |
| 192 | 7792   | TNFSF13B    | 6.80                 | 6.30                     | -0.50                      | -3.57                   | 0.01                       | 0.01                    | DN                        | DN                        | 0                         |
| 193 | 6      | LOC729737   | 4.49                 | 3.99                     | -0.50                      | -0.81                   | 0.00                       | 0.01                    | DN                        | DN                        | 0                         |

**Genes with expression up-regulated by BRD0705 vs Control**

|    |       |          |      |      |      |       |      |      |    |    |    |
|----|-------|----------|------|------|------|-------|------|------|----|----|----|
| 1  | 30318 | MIR4292  | 1.28 | 3.13 | 1.85 | 1.19  | 0.01 | 0.01 | UP | 0  | 0  |
| 2  | 10457 | DQ595494 | 0.00 | 1.46 | 1.46 | 1.43  | 0.00 | 0.00 | UP | 0  | 0  |
| 3  | 1970  | CD48     | 2.01 | 3.30 | 1.29 | 6.43  | 0.00 | 0.01 | UP | UP | UP |
| 4  | 27219 | PMS2L2   | 1.18 | 2.35 | 1.17 | 1.72  | 0.01 | 0.01 | UP | 0  | 0  |
| 5  | 12610 | CCL3     | 0.79 | 1.88 | 1.08 | 3.27  | 0.00 | 0.01 | UP | UP | 0  |
| 6  | 19301 | MIR3653  | 0.46 | 1.55 | 1.08 | 1.31  | 0.00 | 0.01 | UP | 0  | 0  |
| 7  | 17913 | MIR1292  | 0.87 | 1.91 | 1.04 | 1.26  | 0.01 | 0.00 | UP | 0  | 0  |
| 8  | 15388 | C5AR1    | 1.08 | 2.04 | 0.96 | 5.18  | 0.01 | 0.01 | UP | UP | 0  |
| 9  | 23821 | HIST1H3C | 0.82 | 1.78 | 0.96 | 0.87  | 0.01 | 0.00 | UP | 0  | 0  |
| 10 | 2049  | OLFML2B  | 2.69 | 3.62 | 0.93 | 11.65 | 0.00 | 0.01 | UP | UP | UP |

| #  | GeneID | Gene Symbol      | U937.av.log2FPKM.Ctr | U937.av.log2FPKM.BRD0705 | U937.log2FC.BRD0705.vs.Ctr | U937.SNR.BRD0705.vs.Ctr | U937.Pvalue.BRD0705.vs.Ctr | U937.FDR.BRD0705.vs.Ctr | Trend U937.BRD0705.vs.Ctr | Trend U937.BRD0320.vs.Ctr | Trend U937.BRD3731.vs.Ctr |
|----|--------|------------------|----------------------|--------------------------|----------------------------|-------------------------|----------------------------|-------------------------|---------------------------|---------------------------|---------------------------|
| 11 | 23921  | HIST1H4I         | 0.52                 | 1.44                     | 0.92                       | 0.81                    | 0.01                       | 0.00                    | UP                        | 0                         | 0                         |
| 12 | 29086  | LRRRC24          | 0.57                 | 1.46                     | 0.89                       | 0.98                    | 0.00                       | 0.00                    | UP                        | 0                         | 0                         |
| 13 | 110    | TNFRSF14         | 2.85                 | 3.71                     | 0.86                       | 6.13                    | 0.00                       | 0.00                    | UP                        | UP                        | UP                        |
| 14 | 4144   | CTSD             | 10.08                | 10.95                    | 0.86                       | 18.43                   | 0.01                       | 0.00                    | UP                        | UP                        | UP                        |
| 15 | 24487  | CDKN1A           | 1.80                 | 2.63                     | 0.83                       | 3.82                    | 0.00                       | 0.00                    | UP                        | UP                        | 0                         |
| 16 | 18307  | MAFB             | 1.46                 | 2.25                     | 0.79                       | 6.67                    | 0.01                       | 0.00                    | UP                        | UP                        | 0                         |
| 17 | 3385   | DDIT4            | 4.08                 | 4.85                     | 0.77                       | 2.79                    | 0.01                       | 0.01                    | UP                        | UP                        | 0                         |
| 18 | 19385  | HMOX1            | 2.36                 | 3.09                     | 0.73                       | 3.82                    | 0.01                       | 0.01                    | UP                        | UP                        | UP                        |
| 19 | 29824  | TBC1D2           | 4.04                 | 4.74                     | 0.70                       | 10.72                   | 0.00                       | 0.01                    | UP                        | UP                        | UP                        |
| 20 | 23832  | HIST1H4D         | 0.25                 | 0.93                     | 0.69                       | 1.07                    | 0.00                       | 0.01                    | UP                        | 0                         | 0                         |
| 21 | 11746  | OSGIN1           | 1.79                 | 2.47                     | 0.68                       | 2.28                    | 0.01                       | 0.01                    | UP                        | UP                        | 0                         |
| 22 | 12100  | CD68             | 5.84                 | 6.52                     | 0.68                       | 7.10                    | 0.01                       | 0.01                    | UP                        | UP                        | UP                        |
| 23 | 950    | JUN              | 3.35                 | 4.00                     | 0.65                       | 10.91                   | 0.00                       | 0.01                    | UP                        | UP                        | UP                        |
| 24 | 11667  | HP               | 1.16                 | 1.81                     | 0.65                       | 3.60                    | 0.01                       | 0.01                    | UP                        | UP                        | UP                        |
| 25 | 23999  | FKSG63           | 3.87                 | 4.52                     | 0.65                       | 3.65                    | 0.00                       | 0.00                    | UP                        | UP                        | 0                         |
| 26 | 2276   | NCF2             | 3.31                 | 3.95                     | 0.64                       | 4.27                    | 0.01                       | 0.01                    | UP                        | UP                        | UP                        |
| 27 | 14693  | ABHD8            | 2.61                 | 3.25                     | 0.64                       | 8.11                    | 0.00                       | 0.01                    | UP                        | UP                        | 0                         |
| 28 | 24218  | NEU1             | 5.51                 | 6.15                     | 0.64                       | 10.29                   | 0.00                       | 0.00                    | UP                        | UP                        | UP                        |
| 29 | 14723  | IFI30            | 7.07                 | 7.69                     | 0.62                       | 5.34                    | 0.01                       | 0.00                    | UP                        | UP                        | UP                        |
| 30 | 21212  | TM4SF19-TCTEX1D2 | 1.21                 | 1.82                     | 0.61                       | 1.79                    | 0.00                       | 0.00                    | UP                        | UP                        | 0                         |
| 31 | 1971   | SLAMF7           | 0.21                 | 0.80                     | 0.60                       | 2.11                    | 0.01                       | 0.00                    | UP                        | UP                        | 0                         |
| 32 | 23157  | SNORA74A         | 0.13                 | 0.73                     | 0.60                       | 1.51                    | 0.00                       | 0.00                    | UP                        | 0                         | 0                         |
| 33 | 28615  | LY96             | 1.66                 | 2.26                     | 0.60                       | 2.35                    | 0.01                       | 0.00                    | UP                        | UP                        | UP                        |
| 34 | 6652   | DM110804         | 6.24                 | 6.83                     | 0.59                       | 1.11                    | 0.00                       | 0.01                    | UP                        | 0                         | 0                         |
| 35 | 18986  | AK022914         | 0.61                 | 1.20                     | 0.59                       | 1.48                    | 0.00                       | 0.00                    | UP                        | 0                         | 0                         |
| 36 | 11404  | NOD2             | 1.16                 | 1.74                     | 0.58                       | 1.31                    | 0.01                       | 0.00                    | UP                        | UP                        | 0                         |
| 37 | 8897   | NUDT14           | 3.42                 | 3.99                     | 0.57                       | 1.89                    | 0.01                       | 0.01                    | UP                        | UP                        | 0                         |
| 38 | 13505  | SLC26A11         | 0.56                 | 1.11                     | 0.56                       | 4.27                    | 0.00                       | 0.01                    | UP                        | UP                        | 0                         |
| 39 | 13540  | TSPAN10          | 2.41                 | 2.97                     | 0.55                       | 1.31                    | 0.01                       | 0.01                    | UP                        | UP                        | UP                        |
| 40 | 15304  | ZNF296           | 2.91                 | 3.46                     | 0.55                       | 4.72                    | 0.01                       | 0.01                    | UP                        | UP                        | 0                         |
| 41 | 16918  | MARCO            | 2.84                 | 3.39                     | 0.55                       | 2.80                    | 0.01                       | 0.00                    | UP                        | UP                        | UP                        |
| 42 | 3438   | PLAU             | 4.14                 | 4.68                     | 0.54                       | 8.83                    | 0.00                       | 0.00                    | UP                        | UP                        | UP                        |
| 43 | 4567   | CD82             | 5.35                 | 5.89                     | 0.54                       | 3.90                    | 0.00                       | 0.01                    | UP                        | UP                        | UP                        |
| 44 | 7297   | GJB2             | 4.26                 | 4.80                     | 0.54                       | 3.07                    | 0.00                       | 0.01                    | UP                        | UP                        | UP                        |
| 45 | 15997  | ID2              | 5.19                 | 5.73                     | 0.54                       | 3.47                    | 0.01                       | 0.00                    | UP                        | UP                        | 0                         |
| 46 | 21203  | TFRC             | 5.67                 | 6.21                     | 0.54                       | 6.56                    | 0.00                       | 0.01                    | UP                        | UP                        | UP                        |
| 47 | 4990   | B3GAT3           | 4.06                 | 4.58                     | 0.53                       | 3.75                    | 0.01                       | 0.00                    | UP                        | UP                        | UP                        |

| #  | GeneID | Gene Symbol | U937.av.log2FPKM.Ctr | U937.av.log2FPKM.BRD0705 | <b>U937.log2FC.BRD0705.vs.Ctr</b> | U937.SNR.BRD0705.vs.Ctr | U937.Pvalue.BRD0705.vs.Ctr | U937.FDR.BRD0705.vs.Ctr | <b>Trend U937.BRD0705.vs.Ctr</b> | Trend U937.BRD0320.vs.Ctr | Trend U937.BRD3731.vs.Ctr |
|----|--------|-------------|----------------------|--------------------------|-----------------------------------|-------------------------|----------------------------|-------------------------|----------------------------------|---------------------------|---------------------------|
| 48 | 18446  | CEBPB       | 5.08                 | 5.61                     | 0.53                              | 4.86                    | 0.00                       | 0.00                    | UP                               | UP                        | 0                         |
| 49 | 27207  | AL831977    | 0.00                 | 0.52                     | 0.52                              | 3.63                    | 0.00                       | 0.01                    | UP                               | 0                         | 0                         |
| 50 | 28959  | ST3GAL1     | 3.92                 | 4.44                     | 0.52                              | 4.14                    | 0.00                       | 0.00                    | UP                               | UP                        | UP                        |
| 51 | 1990   | FCER1G      | 6.78                 | 7.29                     | 0.51                              | 5.93                    | 0.01                       | 0.01                    | UP                               | UP                        | 0                         |
| 52 | 10794  | AMDHD2      | 2.90                 | 3.42                     | 0.51                              | 2.09                    | 0.01                       | 0.00                    | UP                               | UP                        | 0                         |
| 53 | 18443  | SNAI1       | 1.94                 | 2.45                     | 0.51                              | 2.31                    | 0.01                       | 0.01                    | UP                               | UP                        | 0                         |
| 54 | 28785  | KLF10       | 2.84                 | 3.35                     | 0.51                              | 2.65                    | 0.01                       | 0.01                    | UP                               | UP                        | 0                         |
| 55 | 4173   | SLC22A18    | 3.40                 | 3.90                     | 0.50                              | 2.41                    | 0.00                       | 0.01                    | UP                               | UP                        | 0                         |

**Table S8. Lists of genes differentially expressed based on an absolute fold change of RPKM expression  $\geq 1.5$ , a P-value  $\leq 0.05$ , and a FDR  $\leq 0.05$  between control and BRD3731-treated U937 cells.**

Lists of genes with significant changes in expression induced by the GSK3B inhibitor BRD3731 estimated by absolute fold change of RPKM expression  $\geq 1.5$ , P-value  $\leq 0.05$ , FDR  $\leq 0.05$ , out of the GRCh37/hg19 genes.

The 203 genes with expression down-regulated by BRD3731 are ranked based on the increasing order of fold change of expression (from low to high). The 187 genes with expression up-regulated by BRD3731 are ranked based on the decreasing order of fold change of expression (from high to low).

Columns 4-5 presents the average  $\log_2(\text{FPKM})$  expression across samples treated with DMSO (Control) and BRD3731. Columns 6-10 present the Fold Change, Signal to Noise Ratio (SNR), P-value and FDR scores for  $\log_2(\text{FPKM})$  expression in BRD3731 treated samples vs control. Columns 11-13 present the trend of the change in expression (down = DN, up = UP, unchanged = 0) induced by the treatment with BRD0705, BRD0320 and BRD3731.

| #                                                                 | GeneID    | Gene Symbol | U937.av.log2FPKM.Ctr | U937.av.log2FPKM.BRD3731 | U937.log2FC.BRD3731.vs.Ctr | U937.SNR.BRD3731.vs.Ctr | U937.Pvalue.BRD3731.vs.Ctr | U937.FDR.BRD3731.vs.Ctr | Trend U937.BRD0705.vs.Ctr | Trend U937.BRD0320.vs.Ctr | Trend U937.BRD3731.vs.Ctr |
|-------------------------------------------------------------------|-----------|-------------|----------------------|--------------------------|----------------------------|-------------------------|----------------------------|-------------------------|---------------------------|---------------------------|---------------------------|
| <b>Genes with expression down-regulated by BRD3731 vs Control</b> |           |             |                      |                          |                            |                         |                            |                         |                           |                           |                           |
| 1                                                                 | 5055      | SERPINB2    | 7.68                 | 5.70                     | -1.97                      | -8.10                   | 0.00                       | 0.02                    | 0                         | UP                        | DN                        |
| 2                                                                 | 653361    | NCF1        | 2.56                 | 0.85                     | -1.72                      | -6.66                   | 0.00                       | 0.02                    | 0                         | DN                        | DN                        |
| 3                                                                 | 4778      | NFE2        | 3.40                 | 1.69                     | -1.71                      | -9.54                   | 0.00                       | 0.00                    | DN                        | DN                        | DN                        |
| 4                                                                 | 53831     | GPR84       | 3.34                 | 1.80                     | -1.54                      | -5.55                   | 0.00                       | 0.02                    | 0                         | 0                         | DN                        |
| 5                                                                 | 124402    | UBALD1      | 4.95                 | 3.48                     | -1.47                      | -15.87                  | 0.00                       | 0.00                    | DN                        | DN                        | DN                        |
| 6                                                                 | 654816    | NCF1B       | 1.76                 | 0.32                     | -1.44                      | -10.31                  | 0.00                       | 0.01                    | 0                         | DN                        | DN                        |
| 7                                                                 | 4680      | CEACAM6     | 1.61                 | 0.18                     | -1.43                      | -10.20                  | 0.00                       | 0.00                    | DN                        | DN                        | DN                        |
| 8                                                                 | 100302237 | MIR1281     | 2.60                 | 1.21                     | -1.38                      | -3.81                   | 0.00                       | 0.03                    | 0                         | 0                         | DN                        |
| 9                                                                 | 283991    | UBALD2      | 3.91                 | 2.56                     | -1.35                      | -8.15                   | 0.00                       | 0.03                    | DN                        | DN                        | DN                        |
| 10                                                                | 2529      | FUT7        | 3.89                 | 2.57                     | -1.31                      | -13.10                  | 0.00                       | 0.02                    | 0                         | DN                        | DN                        |
| 11                                                                | 654817    | NCF1C       | 1.70                 | 0.39                     | -1.31                      | -8.14                   | 0.00                       | 0.02                    | 0                         | DN                        | DN                        |
| 12                                                                | 57491     | AHRR        | 2.61                 | 1.34                     | -1.27                      | -8.84                   | 0.00                       | 0.01                    | 0                         | 0                         | DN                        |
| 13                                                                | 10602     | CDC42EP3    | 4.69                 | 3.43                     | -1.26                      | -10.28                  | 0.00                       | 0.01                    | 0                         | 0                         | DN                        |
| 14                                                                | 25946     | ZNF385A     | 2.62                 | 1.44                     | -1.17                      | -10.51                  | 0.00                       | 0.03                    | 0                         | DN                        | DN                        |
| 15                                                                | 290       | ANPEP       | 6.50                 | 5.35                     | -1.15                      | -36.82                  | 0.00                       | 0.01                    | 0                         | 0                         | DN                        |
| 16                                                                | 1089      | CEACAM4     | 3.23                 | 2.09                     | -1.15                      | -4.26                   | 0.00                       | 0.02                    | DN                        | DN                        | DN                        |
| 17                                                                | 9002      | F2RL3       | 2.93                 | 1.78                     | -1.15                      | -5.51                   | 0.00                       | 0.03                    | 0                         | UP                        | DN                        |
| 18                                                                | 283663    | LINC00926   | 5.68                 | 4.59                     | -1.09                      | -8.03                   | 0.00                       | 0.02                    | 0                         | 0                         | DN                        |
| 19                                                                | 2517      | FUCA1       | 4.58                 | 3.49                     | -1.09                      | -10.49                  | 0.00                       | 0.01                    | 0                         | UP                        | DN                        |
| 20                                                                | 197358    | NLRC3       | 2.94                 | 1.86                     | -1.08                      | -27.67                  | 0.00                       | 0.00                    | DN                        | DN                        | DN                        |

| #  | GeneID | Gene Symbol | U937.av.log2FPKM.Ctr | U937.av.log2FPKM.BRD3731 | <b>U937.log2FC.BRD3731.vs.Ctr</b> | U937.SNR.BRD3731.vs.Ctr | U937.Pvalue.BRD3731.vs.Ctr | U937.FDR.BRD3731.vs.Ctr | Trend U937.BRD0705.vs.Ctr | Trend U937.BRD0320.vs.Ctr | <b>Trend U937.BRD3731.vs.Ctr</b> |
|----|--------|-------------|----------------------|--------------------------|-----------------------------------|-------------------------|----------------------------|-------------------------|---------------------------|---------------------------|----------------------------------|
| 21 | 90427  | BMF         | 1.94                 | 0.89                     | -1.05                             | -8.92                   | 0.00                       | 0.01                    | 0                         | 0                         | DN                               |
| 22 | 8111   | GPR68       | 1.34                 | 0.29                     | -1.05                             | -5.08                   | 0.00                       | 0.02                    | 0                         | 0                         | UP DN                            |
| 23 | 23136  | EPB41L3     | 3.90                 | 2.85                     | -1.05                             | -10.38                  | 0.00                       | 0.02                    | 0                         | 0                         | DN                               |
| 24 | 8519   | IFITM1      | 2.92                 | 1.91                     | -1.01                             | -8.75                   | 0.00                       | 0.02                    | DN                        | DN                        | DN                               |
| 25 | 64092  | SAMSN1      | 2.35                 | 1.34                     | -1.00                             | -4.54                   | 0.01                       | 0.05                    | 0                         | 0                         | UP DN                            |
| 26 | na     | SMIM24      | 1.86                 | 0.87                     | -0.99                             | -5.13                   | 0.00                       | 0.01                    | 0                         | 0                         | DN                               |
| 27 | 65018  | PINK1       | 1.78                 | 0.81                     | -0.97                             | -11.08                  | 0.00                       | 0.00                    | DN                        | DN                        | DN                               |
| 28 | 3683   | ITGAL       | 4.42                 | 3.45                     | -0.97                             | -12.13                  | 0.00                       | 0.01                    | 0                         | 0                         | DN                               |
| 29 | 10461  | MERTK       | 3.44                 | 2.47                     | -0.97                             | -5.26                   | 0.00                       | 0.02                    | 0                         | 0                         | DN                               |
| 30 | 10608  | MXD4        | 2.32                 | 1.35                     | -0.97                             | -15.53                  | 0.00                       | 0.01                    | DN                        | DN                        | DN                               |
| 31 | 10501  | SEMA6B      | 3.53                 | 2.57                     | -0.96                             | -13.05                  | 0.00                       | 0.01                    | 0                         | 0                         | UP DN                            |
| 32 | 58476  | TP53INP2    | 2.64                 | 1.69                     | -0.95                             | -11.48                  | 0.00                       | 0.00                    | DN                        | DN                        | DN                               |
| 33 | 64386  | MMP25       | 2.18                 | 1.23                     | -0.95                             | -19.29                  | 0.00                       | 0.01                    | 0                         | 0                         | DN DN                            |
| 34 | 1543   | CYP1A1      | 1.43                 | 0.49                     | -0.94                             | -5.73                   | 0.00                       | 0.01                    | 0                         | 0                         | UP DN                            |
| 35 | 5763   | PTMS        | 5.41                 | 4.47                     | -0.94                             | -13.47                  | 0.00                       | 0.00                    | 0                         | 0                         | DN                               |
| 36 | 145788 | C15orf65    | 2.18                 | 1.26                     | -0.92                             | -4.08                   | 0.00                       | 0.03                    | 0                         | 0                         | DN                               |
| 37 | 1880   | GPR183      | 4.98                 | 4.06                     | -0.92                             | -3.57                   | 0.00                       | 0.03                    | 0                         | 0                         | UP DN                            |
| 38 | 404217 | CTXN1       | 3.86                 | 2.96                     | -0.90                             | -3.02                   | 0.00                       | 0.04                    | 0                         | 0                         | DN DN                            |
| 39 | 7903   | ST8SIA4     | 2.34                 | 1.44                     | -0.90                             | -17.08                  | 0.00                       | 0.01                    | DN                        | DN                        | DN                               |
| 40 | 10397  | NDRG1       | 5.54                 | 4.65                     | -0.89                             | -7.07                   | 0.00                       | 0.01                    | 0                         | 0                         | DN DN                            |
| 41 | 5294   | PIK3CG      | 4.44                 | 3.56                     | -0.88                             | -5.08                   | 0.01                       | 0.04                    | DN                        | DN                        | DN                               |
| 42 | 978    | CDA         | 5.86                 | 4.99                     | -0.88                             | -12.78                  | 0.00                       | 0.00                    | 0                         | 0                         | DN DN                            |
| 43 | 29785  | CYP2S1      | 3.01                 | 2.15                     | -0.87                             | -5.81                   | 0.00                       | 0.02                    | 0                         | 0                         | DN                               |
| 44 | 374907 | B3GNT8      | 2.27                 | 1.42                     | -0.85                             | -4.54                   | 0.00                       | 0.02                    | DN                        | DN                        | DN                               |
| 45 | 2204   | FCAR        | 3.79                 | 2.94                     | -0.85                             | -4.64                   | 0.01                       | 0.04                    | 0                         | 0                         | UP DN                            |
| 46 | 51247  | PAIP2       | 5.37                 | 4.53                     | -0.84                             | -12.57                  | 0.00                       | 0.00                    | DN                        | DN                        | DN                               |
| 47 | 54855  | FAM46C      | 2.55                 | 1.71                     | -0.84                             | -3.50                   | 0.00                       | 0.03                    | 0                         | 0                         | DN DN                            |
| 48 | 55081  | IFT57       | 4.95                 | 4.11                     | -0.84                             | -12.58                  | 0.00                       | 0.02                    | 0                         | 0                         | DN DN                            |
| 49 | 1958   | EGR1        | 1.83                 | 0.99                     | -0.84                             | -3.21                   | 0.00                       | 0.02                    | 0                         | 0                         | DN                               |
| 50 | 241    | ALOX5AP     | 6.48                 | 5.64                     | -0.83                             | -12.58                  | 0.00                       | 0.01                    | 0                         | 0                         | DN                               |
| 51 | 51667  | NUB1        | 3.77                 | 2.94                     | -0.83                             | -7.28                   | 0.00                       | 0.03                    | DN                        | DN                        | DN                               |
| 52 | 27250  | PDCD4       | 4.12                 | 3.29                     | -0.83                             | -20.71                  | 0.00                       | 0.00                    | DN                        | DN                        | DN                               |
| 53 | 11031  | RAB31       | 5.51                 | 4.68                     | -0.83                             | -6.91                   | 0.00                       | 0.02                    | 0                         | 0                         | DN DN                            |
| 54 | 7462   | LAT2        | 6.56                 | 5.74                     | -0.83                             | -16.64                  | 0.00                       | 0.00                    | DN                        | DN                        | DN                               |
| 55 | 118429 | ANTXR2      | 3.12                 | 2.30                     | -0.82                             | -6.41                   | 0.00                       | 0.01                    | DN                        | DN                        | DN                               |
| 56 | 4046   | LSP1        | 4.98                 | 4.16                     | -0.82                             | -10.75                  | 0.00                       | 0.00                    | 0                         | 0                         | DN                               |
| 57 | 5577   | PRKAR2B     | 3.10                 | 2.28                     | -0.82                             | -9.69                   | 0.00                       | 0.03                    | DN                        | DN                        | DN                               |

| #  | GeneID    | Gene Symbol  | U937.av.log2FPKM.Ctr | U937.av.log2FPKM.BRD3731 | U937.log2FC.BRD3731.vs.Ctr | U937.SNR.BRD3731.vs.Ctr | U937.Pvalue.BRD3731.vs.Ctr | U937.FDR.BRD3731.vs.Ctr | Trend U937.BRD0705.vs.Ctr | Trend U937.BRD0320.vs.Ctr | Trend U937.BRD3731.vs.Ctr |
|----|-----------|--------------|----------------------|--------------------------|----------------------------|-------------------------|----------------------------|-------------------------|---------------------------|---------------------------|---------------------------|
| 58 | 54039     | PCBP3        | 4.00                 | 3.18                     | -0.82                      | -5.67                   | 0.00                       | 0.01                    | 0                         | 0                         | DN                        |
| 59 | 1746      | DLX2         | 2.38                 | 1.57                     | -0.81                      | -6.15                   | 0.00                       | 0.02                    | 0                         | 0                         | DN                        |
| 60 | 10409     | BASP1        | 5.55                 | 4.74                     | -0.80                      | -4.23                   | 0.00                       | 0.02                    | 0                         | 0                         | DN                        |
| 61 | 80774     | LIMD2        | 2.99                 | 2.22                     | -0.77                      | -4.63                   | 0.00                       | 0.01                    | 0                         | 0                         | DN DN                     |
| 62 | 2354      | FOSB         | 1.83                 | 1.06                     | -0.77                      | -3.63                   | 0.00                       | 0.02                    | 0                         | 0                         | DN                        |
| 63 | 81618     | ITM2C        | 4.32                 | 3.55                     | -0.77                      | -9.71                   | 0.00                       | 0.02                    | 0                         | 0                         | DN DN                     |
| 64 | 222166    | MTURN        | 2.71                 | 1.94                     | -0.77                      | -8.99                   | 0.00                       | 0.01                    | 0                         | 0                         | DN                        |
| 65 | 57326     | PBXIP1       | 2.21                 | 1.44                     | -0.77                      | -6.75                   | 0.00                       | 0.01                    | DN                        | DN                        | DN                        |
| 66 | 9398      | CD101        | 1.11                 | 0.35                     | -0.76                      | -5.94                   | 0.00                       | 0.01                    | 0                         | 0                         | DN                        |
| 67 | 64061     | TSPYL2       | 3.49                 | 2.73                     | -0.76                      | -7.26                   | 0.00                       | 0.02                    | 0                         | 0                         | DN                        |
| 68 | 23048     | FNBP1        | 4.72                 | 3.96                     | -0.76                      | -10.14                  | 0.00                       | 0.03                    | 0                         | 0                         | DN                        |
| 69 | 26207     | PITPNC1      | 3.73                 | 2.97                     | -0.76                      | -8.54                   | 0.00                       | 0.01                    | 0                         | 0                         | DN                        |
| 70 | 4609      | MYC          | 8.28                 | 7.53                     | -0.76                      | -10.57                  | 0.00                       | 0.01                    | 0                         | 0                         | DN DN                     |
| 71 | 4069      | LYZ          | 9.49                 | 8.74                     | -0.75                      | -6.76                   | 0.00                       | 0.01                    | 0                         | 0                         | DN DN                     |
| 72 | 3550      | IK           | 6.22                 | 5.46                     | -0.75                      | -23.24                  | 0.00                       | 0.01                    | 0                         | 0                         | DN DN                     |
| 73 | 9644      | SH3PXD2A     | 2.66                 | 1.92                     | -0.74                      | -7.46                   | 0.01                       | 0.04                    | 0                         | 0                         | UP DN                     |
| 74 | 4318      | MMP9         | 1.80                 | 1.06                     | -0.74                      | -5.05                   | 0.01                       | 0.05                    | 0                         | 0                         | DN                        |
| 75 | 55837     | EAPP         | 4.22                 | 3.49                     | -0.73                      | -9.15                   | 0.00                       | 0.01                    | DN                        | DN                        | DN                        |
| 76 | 100131801 | PET100       | 6.71                 | 5.98                     | -0.73                      | -3.08                   | 0.00                       | 0.02                    | 0                         | 0                         | DN                        |
| 77 | 26511     | CHIC2        | 3.07                 | 2.34                     | -0.73                      | -7.09                   | 0.00                       | 0.01                    | 0                         | 0                         | DN DN                     |
| 78 | 9541      | CIR1         | 4.97                 | 4.25                     | -0.73                      | -7.23                   | 0.00                       | 0.01                    | DN                        | DN                        | DN                        |
| 79 | 2323      | FLT3LG       | 1.51                 | 0.78                     | -0.73                      | -2.72                   | 0.01                       | 0.04                    | 0                         | 0                         | DN                        |
| 80 | 3242      | HPD          | 1.87                 | 1.15                     | -0.72                      | -3.12                   | 0.00                       | 0.02                    | 0                         | 0                         | DN                        |
| 81 | 57186     | RALGAPA2     | 2.43                 | 1.70                     | -0.72                      | -4.03                   | 0.00                       | 0.02                    | 0                         | 0                         | DN                        |
| 82 | 25901     | CCDC28A      | 3.00                 | 2.28                     | -0.71                      | -2.75                   | 0.00                       | 0.03                    | DN                        | DN                        | DN                        |
| 83 | 20        | ABCA2        | 1.63                 | 0.91                     | -0.71                      | -11.88                  | 0.00                       | 0.00                    | 0                         | 0                         | DN DN                     |
| 84 | na        | LOC100507419 | 1.95                 | 1.24                     | -0.71                      | -4.37                   | 0.00                       | 0.02                    | 0                         | 0                         | DN                        |
| 85 | 84232     | MAF1         | 6.08                 | 5.37                     | -0.71                      | -12.22                  | 0.00                       | 0.01                    | 0                         | 0                         | DN DN                     |
| 86 | 57132     | CHMP1B       | 3.66                 | 2.96                     | -0.71                      | -7.25                   | 0.00                       | 0.01                    | DN                        | DN                        | DN                        |
| 87 | 23091     | ZC3H13       | 5.06                 | 4.36                     | -0.70                      | -4.55                   | 0.01                       | 0.04                    | 0                         | 0                         | DN DN                     |
| 88 | 26100     | WIPI2        | 4.64                 | 3.94                     | -0.70                      | -16.34                  | 0.00                       | 0.00                    | 0                         | 0                         | DN DN                     |
| 89 | 8660      | IRS2         | 4.83                 | 4.13                     | -0.70                      | -10.11                  | 0.00                       | 0.00                    | 0                         | 0                         | DN                        |
| 90 | 3137      | HLA-J        | 1.29                 | 0.60                     | -0.70                      | -3.60                   | 0.00                       | 0.04                    | 0                         | 0                         | DN                        |
| 91 | 745       | MYRF         | 1.71                 | 1.01                     | -0.69                      | -10.68                  | 0.00                       | 0.03                    | 0                         | 0                         | DN DN                     |
| 92 | 7791      | ZYX          | 7.82                 | 7.13                     | -0.69                      | -9.82                   | 0.00                       | 0.02                    | 0                         | 0                         | DN                        |
| 93 | 55593     | OTUD5        | 4.60                 | 3.92                     | -0.68                      | -8.73                   | 0.00                       | 0.02                    | 0                         | 0                         | DN                        |
| 94 | 64005     | MYO1G        | 6.01                 | 5.34                     | -0.67                      | -9.17                   | 0.00                       | 0.03                    | 0                         | 0                         | UP DN                     |



| #   | GeneID | Gene Symbol | U937.av.log2FPKM.Ctr | U937.av.log2FPKM.BRD3731 | <b>U937.log2FC.BRD3731.vs.Ctr</b> | U937.SNR.BRD3731.vs.Ctr | U937.Pvalue.BRD3731.vs.Ctr | U937.FDR.BRD3731.vs.Ctr | Trend U937.BRD0705.vs.Ctr | Trend U937.BRD0320.vs.Ctr | <b>Trend U937.BRD3731.vs.Ctr</b> |
|-----|--------|-------------|----------------------|--------------------------|-----------------------------------|-------------------------|----------------------------|-------------------------|---------------------------|---------------------------|----------------------------------|
| 95  | 9938   | ARHGAP25    | 2.69                 | 2.02                     | -0.67                             | -4.49                   | 0.00                       | 0.03                    | 0                         | 0                         | DN                               |
| 96  | 3800   | KIF5C       | 1.62                 | 0.96                     | -0.66                             | -4.47                   | 0.00                       | 0.02                    | 0                         | 0                         | DN                               |
| 97  | 93349  | SP140L      | 2.68                 | 2.02                     | -0.66                             | -4.20                   | 0.00                       | 0.03                    | 0                         | 0                         | DN                               |
| 98  | 56978  | PRDM8       | 1.68                 | 1.03                     | -0.66                             | -4.44                   | 0.01                       | 0.05                    | 0                         | 0                         | DN DN                            |
| 99  | 57658  | CALCOCO1    | 1.68                 | 1.03                     | -0.65                             | -3.55                   | 0.00                       | 0.02                    | DN                        | DN                        | DN                               |
| 100 | 23038  | WDTC1       | 3.00                 | 2.34                     | -0.65                             | -3.90                   | 0.00                       | 0.02                    | DN                        | DN                        | DN                               |
| 101 | 57599  | WDR48       | 3.81                 | 3.15                     | -0.65                             | -7.76                   | 0.00                       | 0.02                    | DN                        | DN                        | DN                               |
| 102 | 55859  | BEX1        | 8.20                 | 7.55                     | -0.65                             | -8.57                   | 0.00                       | 0.03                    | 0                         | 0                         | DN DN                            |
| 103 | 10957  | PNRC1       | 2.13                 | 1.48                     | -0.65                             | -8.26                   | 0.00                       | 0.01                    | DN                        | DN                        | DN                               |
| 104 | 5791   | PTPRE       | 2.96                 | 2.31                     | -0.65                             | -4.18                   | 0.01                       | 0.04                    | 0                         | 0                         | DN DN                            |
| 105 | 1745   | DLX1        | 6.41                 | 5.77                     | -0.64                             | -4.92                   | 0.00                       | 0.03                    | 0                         | 0                         | DN                               |
| 106 | 84941  | HSH2D       | 3.34                 | 2.70                     | -0.64                             | -4.66                   | 0.00                       | 0.02                    | 0                         | 0                         | DN DN                            |
| 107 | 23533  | PIK3R5      | 3.53                 | 2.89                     | -0.64                             | -4.82                   | 0.00                       | 0.02                    | 0                         | 0                         | DN                               |
| 108 | 79895  | ATP8B4      | 4.90                 | 4.26                     | -0.64                             | -9.84                   | 0.00                       | 0.03                    | 0                         | 0                         | DN DN                            |
| 109 | 1992   | SERPINB1    | 6.59                 | 5.95                     | -0.64                             | -5.56                   | 0.00                       | 0.02                    | 0                         | 0                         | DN DN                            |
| 110 | 6655   | SOS2        | 2.57                 | 1.93                     | -0.63                             | -5.81                   | 0.00                       | 0.02                    | DN                        | DN                        | DN                               |
| 111 | 392617 | ELFN1       | 2.36                 | 1.73                     | -0.63                             | -4.44                   | 0.00                       | 0.02                    | 0                         | 0                         | DN DN                            |
| 112 | 83605  | CCM2        | 4.42                 | 3.79                     | -0.63                             | -4.14                   | 0.01                       | 0.04                    | 0                         | 0                         | DN                               |
| 113 | 8233   | ZRSR2       | 3.85                 | 3.22                     | -0.63                             | -6.42                   | 0.00                       | 0.03                    | 0                         | 0                         | DN                               |
| 114 | 115019 | SLC26A9     | 4.54                 | 3.92                     | -0.62                             | -3.47                   | 0.00                       | 0.02                    | 0                         | 0                         | DN DN                            |
| 115 | 9333   | TGM5        | 5.07                 | 4.45                     | -0.62                             | -13.16                  | 0.00                       | 0.02                    | 0                         | 0                         | DN                               |
| 116 | 7538   | ZFP36       | 3.41                 | 2.79                     | -0.62                             | -3.55                   | 0.00                       | 0.02                    | 0                         | 0                         | DN                               |
| 117 | 359845 | FAM101B     | 6.22                 | 5.60                     | -0.62                             | -16.47                  | 0.00                       | 0.01                    | 0                         | 0                         | DN DN                            |
| 118 | 10051  | SMC4        | 6.67                 | 6.05                     | -0.62                             | -5.07                   | 0.00                       | 0.02                    | 0                         | 0                         | DN DN                            |
| 119 | 10444  | ZER1        | 1.73                 | 1.12                     | -0.62                             | -2.58                   | 0.01                       | 0.04                    | DN                        | DN                        | DN                               |
| 120 | 253738 | EBF3        | 2.12                 | 1.50                     | -0.62                             | -5.85                   | 0.00                       | 0.01                    | 0                         | 0                         | DN DN                            |
| 121 | 6251   | RSU1        | 5.52                 | 4.90                     | -0.61                             | -8.44                   | 0.00                       | 0.01                    | 0                         | 0                         | DN                               |
| 122 | 54997  | TESC        | 7.28                 | 6.67                     | -0.61                             | -4.88                   | 0.00                       | 0.02                    | 0                         | 0                         | DN DN                            |
| 123 | 56650  | CLDND1      | 5.05                 | 4.45                     | -0.60                             | -3.23                   | 0.00                       | 0.02                    | 0                         | 0                         | UP DN                            |
| 124 | 8743   | TNFSF10     | 1.19                 | 0.59                     | -0.60                             | -4.81                   | 0.00                       | 0.02                    | 0                         | 0                         | DN DN                            |
| 125 | 7171   | TPM4        | 7.74                 | 7.14                     | -0.60                             | -6.99                   | 0.00                       | 0.02                    | 0                         | 0                         | DN                               |
| 126 | 11168  | PSIP1       | 5.31                 | 4.71                     | -0.60                             | -6.15                   | 0.00                       | 0.01                    | 0                         | 0                         | DN DN                            |
| 127 | 5064   | PALM        | 1.86                 | 1.26                     | -0.60                             | -4.11                   | 0.01                       | 0.04                    | 0                         | 0                         | DN DN                            |
| 128 | 5152   | PDE9A       | 2.86                 | 2.27                     | -0.60                             | -6.68                   | 0.00                       | 0.01                    | 0                         | 0                         | DN DN                            |
| 129 | 79641  | ROGDI       | 4.45                 | 3.86                     | -0.60                             | -5.70                   | 0.00                       | 0.01                    | 0                         | 0                         | DN DN                            |
| 130 | 10569  | SLU7        | 4.06                 | 3.46                     | -0.60                             | -5.40                   | 0.00                       | 0.02                    | 0                         | 0                         | DN DN                            |
| 131 | 6920   | TCEA3       | 1.47                 | 0.88                     | -0.59                             | -5.67                   | 0.00                       | 0.03                    | 0                         | 0                         | DN                               |

| #   | GeneID | Gene Symbol | U937.av.log2FPKM.Ctr | U937.av.log2FPKM.BRD3731 | <b>U937.log2FC.BRD3731.vs.Ctr</b> | U937.SNR.BRD3731.vs.Ctr | U937.Pvalue.BRD3731.vs.Ctr | U937.FDR.BRD3731.vs.Ctr | Trend U937.BRD0705.vs.Ctr | Trend U937.BRD0320.vs.Ctr | <b>Trend U937.BRD3731.vs.Ctr</b> |
|-----|--------|-------------|----------------------|--------------------------|-----------------------------------|-------------------------|----------------------------|-------------------------|---------------------------|---------------------------|----------------------------------|
| 132 | 3659   | IRF1        | 2.19                 | 1.60                     | -0.59                             | -4.23                   | 0.00                       | 0.02                    | 0                         | DN                        | DN                               |
| 133 | 10023  | FRAT1       | 1.99                 | 1.40                     | -0.59                             | -3.26                   | 0.01                       | 0.04                    | DN                        | DN                        | DN                               |
| 134 | 64131  | XYLT1       | 2.23                 | 1.64                     | -0.59                             | -3.88                   | 0.00                       | 0.02                    | 0                         | 0                         | DN                               |
| 135 | 549    | AUH         | 2.34                 | 1.75                     | -0.59                             | -2.95                   | 0.00                       | 0.04                    | DN                        | DN                        | DN                               |
| 136 | 5031   | P2RY6       | 2.08                 | 1.49                     | -0.58                             | -4.23                   | 0.00                       | 0.02                    | 0                         | 0                         | DN                               |
| 137 | 26017  | FAM32A      | 7.06                 | 6.48                     | -0.58                             | -3.93                   | 0.00                       | 0.02                    | 0                         | 0                         | DN                               |
| 138 | 23130  | ATG2A       | 2.11                 | 1.53                     | -0.58                             | -3.80                   | 0.00                       | 0.03                    | 0                         | DN                        | DN                               |
| 139 | 5212   | VIT         | 1.81                 | 1.23                     | -0.58                             | -4.68                   | 0.00                       | 0.03                    | 0                         | 0                         | DN                               |
| 140 | 7040   | TGFB1       | 7.41                 | 6.84                     | -0.57                             | -7.75                   | 0.00                       | 0.01                    | 0                         | 0                         | DN                               |
| 141 | 55075  | UACA        | 1.84                 | 1.27                     | -0.57                             | -5.95                   | 0.00                       | 0.01                    | 0                         | DN                        | DN                               |
| 142 | 1316   | KLF6        | 3.39                 | 2.81                     | -0.57                             | -4.03                   | 0.00                       | 0.02                    | 0                         | 0                         | DN                               |
| 143 | 9821   | RB1CC1      | 3.54                 | 2.96                     | -0.57                             | -3.38                   | 0.00                       | 0.04                    | DN                        | DN                        | DN                               |
| 144 | 55320  | MIS18BP1    | 5.01                 | 4.44                     | -0.57                             | -3.72                   | 0.00                       | 0.02                    | DN                        | DN                        | DN                               |
| 145 | 126308 | MOB3A       | 5.22                 | 4.65                     | -0.57                             | -12.94                  | 0.00                       | 0.02                    | 0                         | 0                         | DN                               |
| 146 | 6079   | SNORD15A    | 1.60                 | 1.03                     | -0.57                             | -2.67                   | 0.00                       | 0.03                    | 0                         | 0                         | DN                               |
| 147 | 1727   | CYB5R3      | 5.13                 | 4.57                     | -0.57                             | -5.25                   | 0.00                       | 0.04                    | 0                         | 0                         | DN                               |
| 148 | 55544  | RBM38       | 6.67                 | 6.11                     | -0.57                             | -4.87                   | 0.01                       | 0.04                    | 0                         | 0                         | DN                               |
| 149 | 202309 | GAPT        | 3.60                 | 3.04                     | -0.56                             | -4.99                   | 0.00                       | 0.04                    | 0                         | DN                        | DN                               |
| 150 | 9253   | NUMBL       | 3.73                 | 3.17                     | -0.56                             | -5.51                   | 0.00                       | 0.03                    | 0                         | 0                         | DN                               |
| 151 | 3224   | HOXC8       | 1.24                 | 0.68                     | -0.56                             | -2.60                   | 0.00                       | 0.03                    | 0                         | 0                         | DN                               |
| 152 | 5836   | PYGL        | 6.75                 | 6.19                     | -0.56                             | -33.15                  | 0.00                       | 0.00                    | 0                         | 0                         | DN                               |
| 153 | 83658  | DYNLRB1     | 6.13                 | 5.57                     | -0.56                             | -6.36                   | 0.00                       | 0.03                    | 0                         | 0                         | DN                               |
| 154 | 9990   | SLC12A6     | 2.26                 | 1.70                     | -0.56                             | -4.59                   | 0.01                       | 0.04                    | 0                         | 0                         | DN                               |
| 155 | 2208   | FCER2       | 5.36                 | 4.80                     | -0.56                             | -4.03                   | 0.01                       | 0.05                    | 0                         | DN                        | DN                               |
| 156 | 665    | BNIP3L      | 3.47                 | 2.91                     | -0.56                             | -3.52                   | 0.00                       | 0.02                    | DN                        | DN                        | DN                               |
| 157 | 3092   | HIP1        | 3.67                 | 3.12                     | -0.56                             | -6.73                   | 0.00                       | 0.01                    | 0                         | 0                         | DN                               |
| 158 | 246184 | CDC26       | 4.61                 | 4.05                     | -0.56                             | -2.48                   | 0.01                       | 0.05                    | 0                         | DN                        | DN                               |
| 159 | 79144  | PPDPF       | 7.16                 | 6.61                     | -0.55                             | -3.29                   | 0.01                       | 0.05                    | 0                         | 0                         | DN                               |
| 160 | 3557   | IL1RN       | 3.60                 | 3.05                     | -0.55                             | -3.22                   | 0.01                       | 0.04                    | 0                         | DN                        | DN                               |
| 161 | 6285   | S100B       | 2.15                 | 1.61                     | -0.55                             | -2.81                   | 0.01                       | 0.04                    | 0                         | DN                        | DN                               |
| 162 | 80325  | ABTB1       | 1.07                 | 0.52                     | -0.55                             | -3.95                   | 0.00                       | 0.03                    | DN                        | DN                        | DN                               |
| 163 | 56920  | SEMA3G      | 2.74                 | 2.20                     | -0.54                             | -5.60                   | 0.00                       | 0.01                    | 0                         | DN                        | DN                               |
| 164 | 8019   | BRD3        | 2.98                 | 2.44                     | -0.54                             | -6.80                   | 0.00                       | 0.01                    | 0                         | DN                        | DN                               |
| 165 | 26509  | MYOF        | 1.16                 | 0.62                     | -0.54                             | -7.25                   | 0.00                       | 0.01                    | 0                         | 0                         | DN                               |
| 166 | 54828  | BCAS3       | 1.04                 | 0.50                     | -0.54                             | -3.78                   | 0.00                       | 0.02                    | DN                        | DN                        | DN                               |
| 167 | 3561   | IL2RG       | 7.32                 | 6.78                     | -0.54                             | -17.80                  | 0.00                       | 0.01                    | 0                         | DN                        | DN                               |
| 168 | 57153  | SLC44A2     | 2.94                 | 2.40                     | -0.54                             | -7.29                   | 0.00                       | 0.01                    | 0                         | DN                        | DN                               |

| #   | GeneID | Gene Symbol | U937.av.log2FPKM.Ctr | U937.av.log2FPKM.BRD3731 | U937.log2FC.BRD3731.vs.Ctr | U937.SNR.BRD3731.vs.Ctr | U937.Pvalue.BRD3731.vs.Ctr | U937.FDR.BRD3731.vs.Ctr | Trend U937.BRD0705.vs.Ctr | Trend U937.BRD0320.vs.Ctr | Trend U937.BRD3731.vs.Ctr |
|-----|--------|-------------|----------------------|--------------------------|----------------------------|-------------------------|----------------------------|-------------------------|---------------------------|---------------------------|---------------------------|
| 169 | 123803 | NTAN1       | 3.88                 | 3.34                     | -0.54                      | -4.34                   | 0.00                       | 0.02                    | 0                         | 0                         | DN                        |
| 170 | na     | CRACR2B     | 2.25                 | 1.72                     | -0.54                      | -2.72                   | 0.00                       | 0.03                    | 0                         | 0                         | DN                        |
| 171 | 83442  | SH3BGRL3    | 8.40                 | 7.87                     | -0.54                      | -8.35                   | 0.00                       | 0.02                    | 0                         | 0                         | DN                        |
| 172 | 5757   | PTMA        | 10.98                | 10.45                    | -0.53                      | -5.00                   | 0.00                       | 0.01                    | 0                         | 0                         | DN                        |
| 173 | 8650   | NUMB        | 3.79                 | 3.25                     | -0.53                      | -3.57                   | 0.00                       | 0.03                    | 0                         | 0                         | DN                        |
| 174 | 64798  | DEPTOR      | 2.13                 | 1.60                     | -0.53                      | -8.03                   | 0.00                       | 0.03                    | DN                        | DN                        | DN                        |
| 175 | 11157  | LSM6        | 5.80                 | 5.27                     | -0.53                      | -2.74                   | 0.00                       | 0.03                    | 0                         | 0                         | DN                        |
| 176 | 1536   | CYBB        | 6.02                 | 5.49                     | -0.53                      | -6.33                   | 0.00                       | 0.01                    | 0                         | 0                         | DN                        |
| 177 | 30846  | EHD2        | 1.55                 | 1.02                     | -0.53                      | -2.92                   | 0.01                       | 0.04                    | 0                         | 0                         | DN                        |
| 178 | 51347  | TAOK3       | 5.54                 | 5.01                     | -0.53                      | -7.64                   | 0.00                       | 0.04                    | 0                         | 0                         | DN                        |
| 179 | 146330 | FBXL16      | 3.24                 | 2.72                     | -0.53                      | -3.92                   | 0.00                       | 0.02                    | 0                         | 0                         | DN                        |
| 180 | 55871  | CBWD1       | 4.02                 | 3.50                     | -0.53                      | -3.00                   | 0.01                       | 0.04                    | 0                         | 0                         | DN                        |
| 181 | 4582   | MUC1        | 1.78                 | 1.25                     | -0.53                      | -2.41                   | 0.01                       | 0.04                    | 0                         | 0                         | DN                        |
| 182 | 79733  | E2F8        | 4.65                 | 4.12                     | -0.53                      | -4.91                   | 0.01                       | 0.05                    | 0                         | 0                         | DN                        |
| 183 | 160335 | TMTC2       | 1.44                 | 0.91                     | -0.53                      | -3.75                   | 0.00                       | 0.03                    | 0                         | 0                         | DN                        |
| 184 | 7461   | CLIP2       | 2.47                 | 1.95                     | -0.52                      | -3.49                   | 0.00                       | 0.02                    | 0                         | 0                         | DN                        |
| 185 | 220323 | OAF         | 5.61                 | 5.09                     | -0.52                      | -6.27                   | 0.01                       | 0.04                    | 0                         | 0                         | DN                        |
| 186 | 84335  | AKT1S1      | 4.76                 | 4.24                     | -0.52                      | -9.21                   | 0.00                       | 0.01                    | 0                         | 0                         | DN                        |
| 187 | 90864  | SPSB3       | 3.46                 | 2.95                     | -0.52                      | -2.83                   | 0.01                       | 0.04                    | DN                        | DN                        | DN                        |
| 188 | 55454  | CSGALNACT2  | 4.58                 | 4.07                     | -0.51                      | -9.58                   | 0.00                       | 0.01                    | 0                         | 0                         | DN                        |
| 189 | 57713  | SFMBT2      | 3.89                 | 3.37                     | -0.51                      | -3.91                   | 0.00                       | 0.02                    | 0                         | 0                         | DN                        |
| 190 | 83959  | SLC4A11     | 2.22                 | 1.71                     | -0.51                      | -3.99                   | 0.00                       | 0.02                    | 0                         | 0                         | DN                        |
| 191 | 144811 | LACC1       | 2.07                 | 1.56                     | -0.51                      | -2.78                   | 0.00                       | 0.03                    | 0                         | 0                         | UP                        |
| 192 | 83853  | ROPN1L      | 2.07                 | 1.55                     | -0.51                      | -4.81                   | 0.00                       | 0.01                    | DN                        | DN                        | DN                        |
| 193 | 55893  | ZNF395      | 4.37                 | 3.86                     | -0.51                      | -7.58                   | 0.00                       | 0.01                    | 0                         | 0                         | DN                        |
| 194 | 284273 | ZADH2       | 3.75                 | 3.24                     | -0.51                      | -9.20                   | 0.00                       | 0.01                    | 0                         | 0                         | DN                        |
| 195 | 56977  | STOX2       | 1.58                 | 1.07                     | -0.51                      | -6.34                   | 0.00                       | 0.02                    | 0                         | 0                         | DN                        |
| 196 | 26019  | UPF2        | 4.25                 | 3.74                     | -0.51                      | -3.98                   | 0.00                       | 0.02                    | 0                         | 0                         | DN                        |
| 197 | 149076 | ZNF362      | 2.61                 | 2.10                     | -0.51                      | -4.87                   | 0.00                       | 0.02                    | 0                         | 0                         | DN                        |
| 198 | 85313  | PPIL4       | 4.42                 | 3.91                     | -0.51                      | -4.50                   | 0.01                       | 0.05                    | 0                         | 0                         | DN                        |
| 199 | 10194  | TSHZ1       | 3.82                 | 3.32                     | -0.50                      | -6.51                   | 0.00                       | 0.01                    | 0                         | 0                         | DN                        |
| 200 | 53827  | FXYD5       | 8.10                 | 7.59                     | -0.50                      | -12.19                  | 0.00                       | 0.00                    | 0                         | 0                         | DN                        |
| 201 | 3142   | HLX         | 3.09                 | 2.59                     | -0.50                      | -4.15                   | 0.00                       | 0.02                    | 0                         | 0                         | DN                        |
| 202 | 4287   | ATXN3       | 1.77                 | 1.27                     | -0.50                      | -4.04                   | 0.00                       | 0.02                    | DN                        | DN                        | DN                        |
| 203 | 10370  | CITED2      | 6.43                 | 5.93                     | -0.50                      | -6.43                   | 0.00                       | 0.01                    | 0                         | 0                         | DN                        |

**Genes with expression up-regulated by BRD3731 vs Control**

| #  | GeneID    | Gene Symbol | U937.av.log2FPKM.Ctr | U937.av.log2FPKM.BRD3731 | <b>U937.log2FC.BRD3731.vs.Ctr</b> | U937.SNR.BRD3731.vs.Ctr | U937.Pvalue.BRD3731.vs.Ctr | U937.FDR.BRD3731.vs.Ctr | Trend U937.BRD0705.vs.Ctr | Trend U937.BRD0320.vs.Ctr | <b>Trend U937.BRD3731.vs.Ctr</b> |
|----|-----------|-------------|----------------------|--------------------------|-----------------------------------|-------------------------|----------------------------|-------------------------|---------------------------|---------------------------|----------------------------------|
| 1  | 8764      | TNFRSF14    | 2.21                 | 3.83                     | 1.62                              | 14.65                   | 0.00                       | 0.02                    | UP                        | UP                        | UP                               |
| 2  | 51338     | MS4A4A      | 1.31                 | 2.84                     | 1.53                              | 22.96                   | 0.00                       | 0.00                    | 0                         | UP                        | UP                               |
| 3  | na        | SNORD77     | 3.30                 | 4.74                     | 1.44                              | 4.61                    | 0.00                       | 0.01                    | DN                        | 0                         | UP                               |
| 4  | na        | SNORD49A    | 2.95                 | 4.35                     | 1.40                              | 3.16                    | 0.01                       | 0.04                    | 0                         | 0                         | UP                               |
| 5  | 3336      | HSPE1       | 6.25                 | 7.63                     | 1.37                              | 22.40                   | 0.00                       | 0.00                    | 0                         | 0                         | UP                               |
| 6  | 1509      | CTSD        | 9.49                 | 10.83                    | 1.33                              | 33.33                   | 0.00                       | 0.00                    | UP                        | UP                        | UP                               |
| 7  | na        | SNORD80     | 4.84                 | 6.07                     | 1.23                              | 4.67                    | 0.01                       | 0.05                    | 0                         | 0                         | UP                               |
| 8  | 100500802 | MIR3685     | 0.11                 | 1.33                     | 1.22                              | 4.27                    | 0.00                       | 0.03                    | 0                         | 0                         | UP                               |
| 9  | 55357     | TBC1D2      | 2.53                 | 3.75                     | 1.22                              | 6.91                    | 0.00                       | 0.02                    | UP                        | UP                        | UP                               |
| 10 | 26175     | TMEM251     | 2.79                 | 3.98                     | 1.18                              | 6.68                    | 0.00                       | 0.01                    | 0                         | UP                        | UP                               |
| 11 | 0         | RPSAP58     | 2.83                 | 3.99                     | 1.15                              | 5.65                    | 0.00                       | 0.01                    | 0                         | 0                         | UP                               |
| 12 | 79444     | BIRC7       | 1.60                 | 2.73                     | 1.13                              | 7.37                    | 0.00                       | 0.01                    | 0                         | UP                        | UP                               |
| 13 | 514       | ATP5E       | 2.24                 | 3.37                     | 1.13                              | 4.23                    | 0.00                       | 0.02                    | 0                         | 0                         | UP                               |
| 14 | 2760      | GM2A        | 4.55                 | 5.67                     | 1.12                              | 16.97                   | 0.00                       | 0.02                    | 0                         | UP                        | UP                               |
| 15 | 0         | SNORD35B    | 4.17                 | 5.27                     | 1.10                              | 2.74                    | 0.01                       | 0.04                    | 0                         | UP                        | UP                               |
| 16 | 2706      | GJB2        | 1.55                 | 2.64                     | 1.09                              | 6.95                    | 0.00                       | 0.01                    | UP                        | UP                        | UP                               |
| 17 | 123       | PLIN2       | 4.58                 | 5.66                     | 1.08                              | 12.58                   | 0.00                       | 0.01                    | 0                         | UP                        | UP                               |
| 18 | 83882     | TSPAN10     | 1.04                 | 2.11                     | 1.07                              | 6.76                    | 0.00                       | 0.01                    | UP                        | UP                        | UP                               |
| 19 | 732       | C8B         | 0.62                 | 1.61                     | 0.99                              | 4.70                    | 0.00                       | 0.01                    | 0                         | UP                        | UP                               |
| 20 | 84933     | C8orf76     | 1.30                 | 2.29                     | 0.99                              | 7.65                    | 0.00                       | 0.03                    | 0                         | 0                         | UP                               |
| 21 | 284367    | SIGLEC17P   | 2.91                 | 3.89                     | 0.99                              | 7.15                    | 0.00                       | 0.01                    | 0                         | UP                        | UP                               |
| 22 | 4861      | NPAS1       | 1.96                 | 2.94                     | 0.98                              | 5.44                    | 0.00                       | 0.01                    | 0                         | UP                        | UP                               |
| 23 | 968       | CD68        | 4.56                 | 5.53                     | 0.97                              | 16.04                   | 0.00                       | 0.02                    | UP                        | UP                        | UP                               |
| 24 | 1777      | DNASE2      | 4.07                 | 5.03                     | 0.96                              | 5.93                    | 0.01                       | 0.04                    | 0                         | UP                        | UP                               |
| 25 | 8685      | MARCO       | 2.66                 | 3.61                     | 0.95                              | 9.31                    | 0.00                       | 0.03                    | UP                        | UP                        | UP                               |
| 26 | 0         | SNORD88C    | 2.00                 | 2.94                     | 0.95                              | 4.14                    | 0.01                       | 0.04                    | 0                         | 0                         | UP                               |
| 27 | 427       | ASAH1       | 6.55                 | 7.48                     | 0.94                              | 12.96                   | 0.00                       | 0.02                    | 0                         | UP                        | UP                               |
| 28 | 3638      | INSIG1      | 6.11                 | 7.03                     | 0.92                              | 9.97                    | 0.00                       | 0.01                    | 0                         | 0                         | UP                               |
| 29 | 134429    | STARD4      | 2.22                 | 3.12                     | 0.89                              | 4.16                    | 0.00                       | 0.02                    | 0                         | UP                        | UP                               |
| 30 | 4856      | NOV         | 4.56                 | 5.45                     | 0.89                              | 9.85                    | 0.00                       | 0.01                    | 0                         | UP                        | UP                               |
| 31 | 6999      | TDO2        | 0.31                 | 1.17                     | 0.87                              | 3.57                    | 0.00                       | 0.02                    | 0                         | UP                        | UP                               |
| 32 | 0         | SNORD36B    | 2.33                 | 3.19                     | 0.86                              | 2.65                    | 0.00                       | 0.03                    | 0                         | 0                         | UP                               |
| 33 | 5973      | RENBP       | 4.83                 | 5.70                     | 0.86                              | 6.00                    | 0.01                       | 0.04                    | 0                         | UP                        | UP                               |
| 34 | 4758      | NEU1        | 2.78                 | 3.64                     | 0.86                              | 10.52                   | 0.00                       | 0.02                    | UP                        | UP                        | UP                               |
| 35 | na        | SNORD25     | 4.10                 | 4.96                     | 0.85                              | 2.31                    | 0.01                       | 0.04                    | 0                         | 0                         | UP                               |
| 36 | 10087     | COL4A3BP    | 3.25                 | 4.11                     | 0.85                              | 13.12                   | 0.00                       | 0.00                    | 0                         | 0                         | UP                               |
| 37 | 3162      | HMOX1       | 3.25                 | 4.10                     | 0.85                              | 11.27                   | 0.00                       | 0.01                    | UP                        | UP                        | UP                               |

| #  | GeneID    | Gene Symbol | U937.av.log2FPKM.Ctr | U937.av.log2FPKM.BRD3731 | U937.log2FC.BRD3731.vs.Ctr | U937.SNR.BRD3731.vs.Ctr | U937.Pvalue.BRD3731.vs.Ctr | U937.FDR.BRD3731.vs.Ctr | Trend U937.BRD0705.vs.Ctr | Trend U937.BRD0320.vs.Ctr | Trend U937.BRD3731.vs.Ctr |
|----|-----------|-------------|----------------------|--------------------------|----------------------------|-------------------------|----------------------------|-------------------------|---------------------------|---------------------------|---------------------------|
| 38 | 81617     | CAB39L      | 2.84                 | 3.67                     | 0.83                       | 10.21                   | 0.00                       | 0.01                    | 0                         | 0                         | UP                        |
| 39 | 4864      | NPC1        | 5.07                 | 5.90                     | 0.83                       | 10.61                   | 0.00                       | 0.01                    | 0                         | UP                        | UP                        |
| 40 | 55577     | NAGK        | 3.42                 | 4.25                     | 0.83                       | 5.51                    | 0.01                       | 0.05                    | 0                         | UP                        | UP                        |
| 41 | 677777    | SCARNA12    | 3.05                 | 3.87                     | 0.83                       | 2.22                    | 0.01                       | 0.04                    | 0                         | 0                         | UP                        |
| 42 | 677792    | SNORA1      | 1.09                 | 1.91                     | 0.82                       | 2.40                    | 0.00                       | 0.04                    | 0                         | 0                         | UP                        |
| 43 | 2752      | GLUL        | 6.47                 | 7.28                     | 0.81                       | 17.95                   | 0.00                       | 0.02                    | 0                         | UP                        | UP                        |
| 44 | 5734      | PTGER4      | 2.35                 | 3.17                     | 0.81                       | 4.08                    | 0.00                       | 0.02                    | 0                         | UP                        | UP                        |
| 45 | 5173      | PDYN        | 0.75                 | 1.55                     | 0.80                       | 5.66                    | 0.01                       | 0.04                    | 0                         | 0                         | UP                        |
| 46 | 29760     | BLNK        | 0.89                 | 1.69                     | 0.80                       | 2.59                    | 0.00                       | 0.04                    | 0                         | UP                        | UP                        |
| 47 | 4688      | NCF2        | 4.13                 | 4.93                     | 0.80                       | 9.01                    | 0.00                       | 0.01                    | UP                        | UP                        | UP                        |
| 48 | 54951     | COMMD8      | 4.45                 | 5.24                     | 0.79                       | 6.05                    | 0.00                       | 0.01                    | 0                         | 0                         | UP                        |
| 49 | 84959     | UBASH3B     | 4.15                 | 4.94                     | 0.79                       | 7.88                    | 0.00                       | 0.02                    | 0                         | 0                         | UP                        |
| 50 | 6134      | RPL10       | 8.54                 | 9.32                     | 0.79                       | 11.09                   | 0.00                       | 0.02                    | 0                         | 0                         | UP                        |
| 51 | 3240      | HP          | 1.06                 | 1.84                     | 0.79                       | 4.47                    | 0.00                       | 0.03                    | UP                        | UP                        | UP                        |
| 52 | 644591    | PPIAL4G     | 0.30                 | 1.08                     | 0.78                       | 2.39                    | 0.01                       | 0.04                    | 0                         | 0                         | UP                        |
| 53 | 3725      | JUN         | 3.36                 | 4.14                     | 0.78                       | 5.04                    | 0.00                       | 0.04                    | UP                        | UP                        | UP                        |
| 54 | 26801     | SNORD48     | 1.91                 | 2.69                     | 0.78                       | 2.96                    | 0.00                       | 0.03                    | 0                         | 0                         | UP                        |
| 55 | 23643     | LY96        | 0.38                 | 1.15                     | 0.77                       | 4.16                    | 0.00                       | 0.02                    | UP                        | UP                        | UP                        |
| 56 | 3732      | CD82        | 4.41                 | 5.18                     | 0.77                       | 10.33                   | 0.00                       | 0.00                    | UP                        | UP                        | UP                        |
| 57 | 1649      | DDIT3       | 2.64                 | 3.40                     | 0.75                       | 3.98                    | 0.00                       | 0.02                    | 0                         | UP                        | UP                        |
| 58 | 56342     | PPAN        | 2.45                 | 3.21                     | 0.75                       | 6.77                    | 0.00                       | 0.01                    | 0                         | 0                         | UP                        |
| 59 | 10457     | GPNMB       | 6.68                 | 7.43                     | 0.75                       | 17.45                   | 0.00                       | 0.02                    | 0                         | UP                        | UP                        |
| 60 | 440574    | MINOS1      | 4.14                 | 4.88                     | 0.74                       | 5.93                    | 0.00                       | 0.02                    | 0                         | 0                         | UP                        |
| 61 | 100129460 | DPY19L1P1   | 1.09                 | 1.83                     | 0.74                       | 5.25                    | 0.00                       | 0.01                    | 0                         | 0                         | UP                        |
| 62 | 10327     | AKR1A1      | 5.83                 | 6.55                     | 0.73                       | 7.74                    | 0.00                       | 0.01                    | 0                         | 0                         | UP                        |
| 63 | 2820      | GPD2        | 2.83                 | 3.56                     | 0.72                       | 5.56                    | 0.00                       | 0.02                    | 0                         | 0                         | UP                        |
| 64 | 10994     | ILVBL       | 4.21                 | 4.93                     | 0.72                       | 7.99                    | 0.00                       | 0.03                    | 0                         | UP                        | UP                        |
| 65 | 10981     | RAB32       | 4.92                 | 5.64                     | 0.72                       | 7.32                    | 0.00                       | 0.01                    | 0                         | 0                         | UP                        |
| 66 | 23480     | SEC61G      | 6.35                 | 7.06                     | 0.71                       | 4.34                    | 0.00                       | 0.02                    | 0                         | 0                         | UP                        |
| 67 | 54939     | COMMD4      | 4.87                 | 5.58                     | 0.71                       | 5.73                    | 0.01                       | 0.04                    | 0                         | 0                         | UP                        |
| 68 | 6147      | RPL23A      | 8.23                 | 8.92                     | 0.70                       | 9.46                    | 0.00                       | 0.02                    | 0                         | 0                         | UP                        |
| 69 | 116379    | IL22RA2     | 0.92                 | 1.62                     | 0.70                       | 2.79                    | 0.00                       | 0.03                    | 0                         | 0                         | UP                        |
| 70 | 113675    | SDSL        | 2.07                 | 2.76                     | 0.69                       | 4.35                    | 0.00                       | 0.02                    | 0                         | UP                        | UP                        |
| 71 | 58528     | RRAGD       | 2.49                 | 3.18                     | 0.69                       | 6.15                    | 0.00                       | 0.03                    | 0                         | UP                        | UP                        |
| 72 | 25798     | BRI3        | 5.90                 | 6.58                     | 0.68                       | 3.56                    | 0.01                       | 0.05                    | 0                         | UP                        | UP                        |
| 73 | 4712      | NDUFB6      | 4.65                 | 5.33                     | 0.67                       | 7.74                    | 0.00                       | 0.03                    | 0                         | 0                         | UP                        |
| 74 | 6164      | RPL34       | 7.92                 | 8.59                     | 0.67                       | 5.88                    | 0.01                       | 0.04                    | 0                         | 0                         | UP                        |

| #   | GeneID | Gene Symbol  | U937.av.log2FPKM.Ctr | U937.av.log2FPKM.BRD3731 | <b>U937.log2FC.BRD3731.vs.Ctr</b> | U937.SNR.BRD3731.vs.Ctr | U937.Pvalue.BRD3731.vs.Ctr | U937.FDR.BRD3731.vs.Ctr | Trend U937.BRD0705.vs.Ctr | Trend U937.BRD0320.vs.Ctr | <b>Trend U937.BRD3731.vs.Ctr</b> |
|-----|--------|--------------|----------------------|--------------------------|-----------------------------------|-------------------------|----------------------------|-------------------------|---------------------------|---------------------------|----------------------------------|
| 75  | 259307 | IL4I1        | 1.44                 | 2.11                     | 0.67                              | 4.78                    | 0.00                       | 0.03                    | 0                         | UP                        | UP                               |
| 76  | na     | LOC100505592 | 0.18                 | 0.85                     | 0.67                              | 2.29                    | 0.01                       | 0.04                    | 0                         | 0                         | UP                               |
| 77  | 8832   | CD84         | 0.71                 | 1.38                     | 0.67                              | 6.45                    | 0.00                       | 0.01                    | 0                         | 0                         | UP                               |
| 78  | 3015   | H2AFZ        | 8.79                 | 9.46                     | 0.67                              | 7.61                    | 0.00                       | 0.01                    | 0                         | 0                         | UP                               |
| 79  | 26799  | SNHG5        | 7.95                 | 8.61                     | 0.66                              | 4.61                    | 0.01                       | 0.04                    | 0                         | 0                         | UP                               |
| 80  | 11068  | CYB561D2     | 2.97                 | 3.63                     | 0.66                              | 4.17                    | 0.00                       | 0.02                    | 0                         | 0                         | UP                               |
| 81  | 64747  | MFSD1        | 5.91                 | 6.57                     | 0.66                              | 10.30                   | 0.00                       | 0.01                    | 0                         | 0                         | UP                               |
| 82  | 4064   | CD180        | 1.47                 | 2.13                     | 0.66                              | 4.35                    | 0.00                       | 0.02                    | 0                         | UP                        | UP                               |
| 83  | 962    | CD48         | 2.49                 | 3.15                     | 0.66                              | 2.80                    | 0.00                       | 0.04                    | UP                        | UP                        | UP                               |
| 84  | 653061 | GOLGA8S      | 2.65                 | 3.30                     | 0.65                              | 8.85                    | 0.00                       | 0.02                    | DN                        | DN                        | UP                               |
| 85  | 9450   | LY86         | 2.82                 | 3.46                     | 0.65                              | 2.98                    | 0.00                       | 0.03                    | 0                         | 0                         | UP                               |
| 86  | na     | TYMSOS       | 1.11                 | 1.76                     | 0.65                              | 2.42                    | 0.01                       | 0.04                    | 0                         | 0                         | UP                               |
| 87  | 64146  | PDF          | 2.29                 | 2.93                     | 0.64                              | 4.97                    | 0.00                       | 0.01                    | 0                         | 0                         | UP                               |
| 88  | 8269   | TMEM187      | 1.29                 | 1.94                     | 0.64                              | 11.12                   | 0.00                       | 0.02                    | 0                         | UP                        | UP                               |
| 89  | 25903  | OLFML2B      | 1.94                 | 2.59                     | 0.64                              | 5.47                    | 0.01                       | 0.05                    | UP                        | UP                        | UP                               |
| 90  | 23753  | SDF2L1       | 5.20                 | 5.84                     | 0.64                              | 3.67                    | 0.00                       | 0.02                    | 0                         | UP                        | UP                               |
| 91  | 1520   | CTSS         | 3.79                 | 4.43                     | 0.64                              | 7.91                    | 0.00                       | 0.01                    | 0                         | UP                        | UP                               |
| 92  | 1317   | SLC31A1      | 3.48                 | 4.12                     | 0.64                              | 9.13                    | 0.00                       | 0.03                    | 0                         | UP                        | UP                               |
| 93  | 153830 | RNF145       | 4.14                 | 4.78                     | 0.64                              | 10.17                   | 0.00                       | 0.03                    | 0                         | 0                         | UP                               |
| 94  | 6307   | MSMO1        | 3.34                 | 3.98                     | 0.64                              | 4.99                    | 0.00                       | 0.02                    | 0                         | UP                        | UP                               |
| 95  | 23521  | RPL13A       | 6.67                 | 7.31                     | 0.64                              | 43.68                   | 0.00                       | 0.00                    | 0                         | 0                         | UP                               |
| 96  | 51171  | HSD17B14     | 0.62                 | 1.26                     | 0.64                              | 3.57                    | 0.00                       | 0.02                    | 0                         | UP                        | UP                               |
| 97  | 388325 | SCIMP        | 0.49                 | 1.13                     | 0.64                              | 8.08                    | 0.00                       | 0.01                    | 0                         | 0                         | UP                               |
| 98  | 719    | C3AR1        | 2.02                 | 2.65                     | 0.63                              | 2.62                    | 0.01                       | 0.04                    | 0                         | UP                        | UP                               |
| 99  | 57464  | STRIP2       | 1.72                 | 2.35                     | 0.63                              | 6.88                    | 0.00                       | 0.01                    | 0                         | UP                        | UP                               |
| 100 | 8460   | TPST1        | 1.42                 | 2.05                     | 0.63                              | 5.86                    | 0.00                       | 0.02                    | 0                         | UP                        | UP                               |
| 101 | 3606   | IL18         | 4.09                 | 4.72                     | 0.63                              | 3.77                    | 0.01                       | 0.05                    | 0                         | 0                         | UP                               |
| 102 | 10437  | IFI30        | 6.58                 | 7.20                     | 0.63                              | 5.93                    | 0.00                       | 0.04                    | UP                        | UP                        | UP                               |
| 103 | 26151  | NAT9         | 3.15                 | 3.77                     | 0.62                              | 4.26                    | 0.00                       | 0.02                    | 0                         | UP                        | UP                               |
| 104 | 9956   | HS3ST2       | 5.71                 | 6.32                     | 0.62                              | 11.95                   | 0.00                       | 0.00                    | 0                         | 0                         | UP                               |
| 105 | 10993  | SDS          | 0.72                 | 1.34                     | 0.62                              | 4.58                    | 0.00                       | 0.02                    | 0                         | UP                        | UP                               |
| 106 | 9056   | SLC7A7       | 1.00                 | 1.61                     | 0.61                              | 4.75                    | 0.00                       | 0.01                    | 0                         | UP                        | UP                               |
| 107 | 125875 | CLDND2       | 1.89                 | 2.50                     | 0.61                              | 2.30                    | 0.01                       | 0.04                    | 0                         | 0                         | UP                               |
| 108 | 932    | MS4A3        | 5.72                 | 6.33                     | 0.61                              | 17.21                   | 0.00                       | 0.01                    | 0                         | DN                        | UP                               |
| 109 | 58515  | SELK         | 5.09                 | 5.70                     | 0.61                              | 21.59                   | 0.00                       | 0.01                    | 0                         | 0                         | UP                               |
| 110 | 79012  | CAMKV        | 0.66                 | 1.27                     | 0.61                              | 3.17                    | 0.00                       | 0.02                    | 0                         | 0                         | UP                               |
| 111 | 3956   | LGALS1       | 8.21                 | 8.82                     | 0.61                              | 8.18                    | 0.00                       | 0.01                    | 0                         | 0                         | UP                               |

| #   | GeneID | Gene Symbol | U937.av.log2FPKM.Ctr | U937.av.log2FPKM.BRD3731 | <b>U937.log2FC.BRD3731.vs.Ctr</b> | U937.SNR.BRD3731.vs.Ctr | U937.Pvalue.BRD3731.vs.Ctr | U937.FDR.BRD3731.vs.Ctr | Trend U937.BRD0705.vs.Ctr | Trend U937.BRD0320.vs.Ctr | <b>Trend U937.BRD3731.vs.Ctr</b> |
|-----|--------|-------------|----------------------|--------------------------|-----------------------------------|-------------------------|----------------------------|-------------------------|---------------------------|---------------------------|----------------------------------|
| 112 | 967    | CD63        | 6.31                 | 6.92                     | 0.61                              | 7.12                    | 0.01                       | 0.04                    | 0                         | UP                        | UP                               |
| 113 | 389541 | LAMTOR4     | 6.60                 | 7.21                     | 0.60                              | 7.27                    | 0.00                       | 0.03                    | 0                         | 0                         | UP                               |
| 114 | 23503  | ZFYVE26     | 2.41                 | 3.02                     | 0.60                              | 3.22                    | 0.00                       | 0.03                    | 0                         | UP                        | UP                               |
| 115 | 5328   | PLAU        | 3.82                 | 4.42                     | 0.60                              | 3.40                    | 0.00                       | 0.04                    | UP                        | UP                        | UP                               |
| 116 | 26267  | FBXO10      | 1.82                 | 2.42                     | 0.60                              | 4.31                    | 0.00                       | 0.02                    | 0                         | 0                         | UP                               |
| 117 | 113828 | FAM83F      | 1.44                 | 2.04                     | 0.60                              | 2.24                    | 0.01                       | 0.04                    | 0                         | 0                         | UP                               |
| 118 | 55238  | SLC38A7     | 2.00                 | 2.60                     | 0.60                              | 4.94                    | 0.00                       | 0.02                    | 0                         | UP                        | UP                               |
| 119 | 9446   | GSTO1       | 6.86                 | 7.46                     | 0.60                              | 9.02                    | 0.00                       | 0.01                    | 0                         | 0                         | UP                               |
| 120 | 2101   | ESRRA       | 4.12                 | 4.71                     | 0.60                              | 12.82                   | 0.00                       | 0.01                    | 0                         | UP                        | UP                               |
| 121 | 253982 | ASPHD1      | 3.54                 | 4.13                     | 0.59                              | 6.21                    | 0.00                       | 0.04                    | 0                         | 0                         | UP                               |
| 122 | 114614 | MIR155HG    | 3.64                 | 4.23                     | 0.59                              | 10.12                   | 0.00                       | 0.02                    | 0                         | 0                         | UP                               |
| 123 | 5003   | SLC22A18AS  | 0.81                 | 1.39                     | 0.58                              | 2.89                    | 0.00                       | 0.03                    | 0                         | UP                        | UP                               |
| 124 | 4495   | MT1G        | 6.36                 | 6.94                     | 0.58                              | 5.15                    | 0.00                       | 0.01                    | 0                         | 0                         | UP                               |
| 125 | 4818   | NKG7        | 7.42                 | 8.00                     | 0.58                              | 9.29                    | 0.00                       | 0.02                    | 0                         | UP                        | UP                               |
| 126 | 6482   | ST3GAL1     | 4.22                 | 4.80                     | 0.58                              | 3.34                    | 0.00                       | 0.02                    | UP                        | UP                        | UP                               |
| 127 | 219855 | SLC37A2     | 2.71                 | 3.29                     | 0.58                              | 6.57                    | 0.01                       | 0.04                    | 0                         | 0                         | UP                               |
| 128 | 221    | ALDH3B1     | 3.57                 | 4.15                     | 0.57                              | 3.91                    | 0.00                       | 0.03                    | 0                         | 0                         | UP                               |
| 129 | 23475  | QPRT        | 2.89                 | 3.47                     | 0.57                              | 4.48                    | 0.00                       | 0.02                    | 0                         | 0                         | UP                               |
| 130 | 51529  | ANAPC11     | 4.21                 | 4.78                     | 0.57                              | 2.15                    | 0.01                       | 0.04                    | 0                         | 0                         | UP                               |
| 131 | 9978   | RBX1        | 5.63                 | 6.20                     | 0.57                              | 4.06                    | 0.00                       | 0.02                    | 0                         | 0                         | UP                               |
| 132 | 51606  | ATP6V1H     | 4.38                 | 4.95                     | 0.57                              | 5.29                    | 0.00                       | 0.01                    | 0                         | UP                        | UP                               |
| 133 | 91689  | SMDT1       | 3.44                 | 4.01                     | 0.57                              | 5.57                    | 0.00                       | 0.01                    | 0                         | 0                         | UP                               |
| 134 | 26227  | PHGDH       | 6.59                 | 7.15                     | 0.57                              | 11.82                   | 0.00                       | 0.01                    | 0                         | UP                        | UP                               |
| 135 | 1632   | ECI1        | 4.33                 | 4.89                     | 0.57                              | 3.13                    | 0.00                       | 0.03                    | 0                         | 0                         | UP                               |
| 136 | 85028  | SNHG12      | 5.32                 | 5.88                     | 0.57                              | 3.42                    | 0.00                       | 0.03                    | 0                         | UP                        | UP                               |
| 137 | 5806   | PTX3        | 2.34                 | 2.90                     | 0.56                              | 2.69                    | 0.01                       | 0.04                    | 0                         | UP                        | UP                               |
| 138 | 9784   | SNX17       | 4.75                 | 5.31                     | 0.56                              | 4.94                    | 0.00                       | 0.01                    | 0                         | 0                         | UP                               |
| 139 | 79019  | CENPM       | 4.84                 | 5.40                     | 0.56                              | 4.16                    | 0.01                       | 0.04                    | 0                         | 0                         | UP                               |
| 140 | 23062  | GGA2        | 5.06                 | 5.62                     | 0.56                              | 8.11                    | 0.00                       | 0.01                    | 0                         | UP                        | UP                               |
| 141 | 0      | SNORD58C    | 2.83                 | 3.39                     | 0.56                              | 6.33                    | 0.00                       | 0.02                    | 0                         | 0                         | UP                               |
| 142 | 57106  | NAT14       | 0.93                 | 1.49                     | 0.56                              | 2.46                    | 0.01                       | 0.05                    | 0                         | 0                         | UP                               |
| 143 | 4669   | NAGLU       | 3.22                 | 3.77                     | 0.56                              | 6.33                    | 0.00                       | 0.01                    | 0                         | UP                        | UP                               |
| 144 | 10043  | TOM1        | 3.12                 | 3.67                     | 0.56                              | 10.69                   | 0.00                       | 0.02                    | 0                         | UP                        | UP                               |
| 145 | 5660   | PSAP        | 6.67                 | 7.22                     | 0.55                              | 7.07                    | 0.00                       | 0.03                    | 0                         | UP                        | UP                               |
| 146 | 4190   | MDH1        | 6.69                 | 7.24                     | 0.55                              | 14.42                   | 0.00                       | 0.01                    | 0                         | 0                         | UP                               |
| 147 | 27342  | KCTD7       | 1.86                 | 2.41                     | 0.55                              | 4.39                    | 0.00                       | 0.01                    | 0                         | UP                        | UP                               |
| 148 | 84331  | FAM195A     | 5.27                 | 5.82                     | 0.55                              | 2.78                    | 0.00                       | 0.03                    | 0                         | UP                        | UP                               |

| #   | GeneID | Gene Symbol  | U937.av.log2FPKM.Ctr | U937.av.log2FPKM.BRD3731 | <b>U937.log2FC.BRD3731.vs.Ctr</b> | U937.SNR.BRD3731.vs.Ctr | U937.Pvalue.BRD3731.vs.Ctr | U937.FDR.BRD3731.vs.Ctr | Trend U937.BRD0705.vs.Ctr | Trend U937.BRD0320.vs.Ctr | <b>Trend U937.BRD3731.vs.Ctr</b> |
|-----|--------|--------------|----------------------|--------------------------|-----------------------------------|-------------------------|----------------------------|-------------------------|---------------------------|---------------------------|----------------------------------|
| 149 | 6322   | SCML1        | 2.14                 | 2.68                     | 0.55                              | 5.95                    | 0.01                       | 0.04                    | 0                         | UP                        | UP                               |
| 150 | 80097  | MZT2B        | 5.66                 | 6.21                     | 0.55                              | 4.15                    | 0.00                       | 0.03                    | 0                         | 0                         | UP                               |
| 151 | 391059 | FRRS1        | 0.83                 | 1.37                     | 0.54                              | 5.60                    | 0.00                       | 0.02                    | 0                         | UP                        | UP                               |
| 152 | 440145 | MZT1         | 4.69                 | 5.24                     | 0.54                              | 3.00                    | 0.00                       | 0.03                    | 0                         | 0                         | UP                               |
| 153 | 8754   | ADAM9        | 4.17                 | 4.71                     | 0.54                              | 5.96                    | 0.00                       | 0.03                    | 0                         | UP                        | UP                               |
| 154 | 199713 | NLRP7        | 1.19                 | 1.73                     | 0.54                              | 5.41                    | 0.00                       | 0.03                    | 0                         | UP                        | UP                               |
| 155 | 8477   | GPR65        | 1.00                 | 1.53                     | 0.54                              | 6.29                    | 0.00                       | 0.02                    | 0                         | UP                        | UP                               |
| 156 | na     | LOC115110    | 0.54                 | 1.07                     | 0.53                              | 2.82                    | 0.00                       | 0.04                    | 0                         | UP                        | UP                               |
| 157 | 29887  | SNX10        | 2.91                 | 3.44                     | 0.53                              | 4.57                    | 0.00                       | 0.04                    | 0                         | 0                         | UP                               |
| 158 | 9315   | NREP         | 4.56                 | 5.09                     | 0.53                              | 14.17                   | 0.00                       | 0.00                    | 0                         | 0                         | UP                               |
| 159 | 84327  | ZBED3        | 2.12                 | 2.65                     | 0.53                              | 3.55                    | 0.01                       | 0.05                    | 0                         | UP                        | UP                               |
| 160 | 10219  | KLRG1        | 1.15                 | 1.68                     | 0.53                              | 2.56                    | 0.00                       | 0.03                    | 0                         | 0                         | UP                               |
| 161 | 746    | TMEM258      | 6.56                 | 7.08                     | 0.52                              | 2.68                    | 0.01                       | 0.05                    | 0                         | 0                         | UP                               |
| 162 | 26503  | SLC17A5      | 3.01                 | 3.53                     | 0.52                              | 4.55                    | 0.01                       | 0.04                    | 0                         | UP                        | UP                               |
| 163 | 26229  | B3GAT3       | 3.37                 | 3.90                     | 0.52                              | 3.57                    | 0.00                       | 0.04                    | UP                        | UP                        | UP                               |
| 164 | 523    | ATP6V1A      | 3.90                 | 4.42                     | 0.52                              | 5.15                    | 0.01                       | 0.05                    | 0                         | UP                        | UP                               |
| 165 | 7037   | TFRC         | 6.17                 | 6.69                     | 0.52                              | 5.37                    | 0.00                       | 0.01                    | UP                        | UP                        | UP                               |
| 166 | 3156   | HMGCR        | 4.28                 | 4.80                     | 0.52                              | 7.54                    | 0.00                       | 0.01                    | 0                         | 0                         | UP                               |
| 167 | 10007  | GNPDA1       | 4.78                 | 5.30                     | 0.52                              | 8.99                    | 0.00                       | 0.01                    | 0                         | 0                         | UP                               |
| 168 | 4708   | NDUFB2       | 6.12                 | 6.64                     | 0.52                              | 3.40                    | 0.00                       | 0.03                    | 0                         | 0                         | UP                               |
| 169 | 1350   | COX7C        | 7.99                 | 8.51                     | 0.52                              | 4.21                    | 0.00                       | 0.04                    | 0                         | 0                         | UP                               |
| 170 | 10160  | FARP1        | 2.04                 | 2.56                     | 0.52                              | 5.21                    | 0.00                       | 0.01                    | 0                         | UP                        | UP                               |
| 171 | 22797  | TFEC         | 2.86                 | 3.37                     | 0.52                              | 20.86                   | 0.00                       | 0.00                    | 0                         | UP                        | UP                               |
| 172 | na     | LOC100506159 | 4.40                 | 4.91                     | 0.51                              | 2.88                    | 0.00                       | 0.04                    | 0                         | 0                         | UP                               |
| 173 | 5027   | P2RX7        | 1.35                 | 1.86                     | 0.51                              | 5.86                    | 0.00                       | 0.01                    | 0                         | 0                         | UP                               |
| 174 | 29100  | TMEM208      | 4.71                 | 5.23                     | 0.51                              | 2.64                    | 0.01                       | 0.05                    | 0                         | 0                         | UP                               |
| 175 | 26769  | GAS5         | 7.31                 | 7.82                     | 0.51                              | 6.36                    | 0.00                       | 0.01                    | 0                         | 0                         | UP                               |
| 176 | 491    | ATP2B2       | 0.79                 | 1.31                     | 0.51                              | 11.83                   | 0.00                       | 0.00                    | 0                         | 0                         | UP                               |
| 177 | 8613   | PPAP2B       | 0.88                 | 1.38                     | 0.51                              | 2.85                    | 0.00                       | 0.03                    | 0                         | UP                        | UP                               |
| 178 | 201163 | FLCN         | 3.01                 | 3.52                     | 0.51                              | 6.08                    | 0.00                       | 0.02                    | 0                         | 0                         | UP                               |
| 179 | 79961  | DENND2D      | 4.55                 | 5.06                     | 0.51                              | 7.85                    | 0.00                       | 0.01                    | 0                         | 0                         | UP                               |
| 180 | 6193   | RPS5         | 10.10                | 10.61                    | 0.50                              | 5.65                    | 0.00                       | 0.02                    | 0                         | 0                         | UP                               |
| 181 | 29968  | PSAT1        | 6.10                 | 6.60                     | 0.50                              | 4.31                    | 0.01                       | 0.05                    | 0                         | UP                        | UP                               |
| 182 | 126382 | NR2C2AP      | 4.16                 | 4.67                     | 0.50                              | 6.09                    | 0.00                       | 0.03                    | 0                         | 0                         | UP                               |
| 183 | 757    | TMEM50B      | 3.94                 | 4.44                     | 0.50                              | 7.56                    | 0.00                       | 0.01                    | 0                         | 0                         | UP                               |
| 184 | 219833 | C11orf45     | 1.64                 | 2.14                     | 0.50                              | 3.63                    | 0.00                       | 0.02                    | 0                         | 0                         | UP                               |
| 185 | 4891   | SLC11A2      | 2.57                 | 3.07                     | 0.50                              | 4.31                    | 0.00                       | 0.02                    | 0                         | 0                         | UP                               |



| #   | GeneID | Gene Symbol | U937.av.log2FPKM.Ctr | U937.av.log2FPKM.BRD3731 | <b>U937.log2FC.BRD3731.vs.Ctr</b> | U937.SNR.BRD3731.vs.Ctr | U937.Pvalue.BRD3731.vs.Ctr | U937.FDR.BRD3731.vs.Ctr | Trend U937.BRD0705.vs.Ctr | Trend U937.BRD0320.vs.Ctr | <b>Trend U937.BRD3731.vs.Ctr</b> |
|-----|--------|-------------|----------------------|--------------------------|-----------------------------------|-------------------------|----------------------------|-------------------------|---------------------------|---------------------------|----------------------------------|
| 186 | 55151  | TMEM38B     | 4.04                 | 4.54                     | 0.50                              | 5.53                    | 0.00                       | 0.03                    | 0                         | 0                         | UP                               |
| 187 | 2582   | GALE        | 5.27                 | 5.77                     | 0.50                              | 7.64                    | 0.00                       | 0.03                    | 0                         | UP                        | UP                               |

**Table S9. Lists of genes differentially expressed based on an absolute fold change of RPKM expression  $\geq 1.5$ , a P-value  $\leq 0.05$ , and a FDR  $\leq 0.05$  between control and BRD0320-treated U937 cells.**

Lists of genes with significant changes in expression induced by the dual GSK3A/GSK3B inhibitor BRD0320 estimated by absolute fold change of RPKM expression  $\geq 1.5$ , P-value  $\leq 0.05$ , FDR  $\leq 0.05$ , out of the GRCh37/hg19 genes.

The 975 genes with expression down-regulated by BRD0320 are ranked based on the increasing order of fold change of expression (from low to high). The 556 genes with expression up-regulated by BRD0320 are ranked based on the decreasing order of fold change of expression (from high to low).

Columns 4-5 presents the average  $\log_2(\text{FPKM})$  expression across samples treated with DMSO (Control) and BRD0320. Columns 6-10 present the Fold Change, Signal to Noise Ratio (SNR), P-value and FDR scores for  $\log_2(\text{FPKM})$  expression in BRD0320 treated samples vs control. Columns 11-13 present the trend of the change in expression (down = DN, up = UP, unchanged = 0) induced by the treatment with the GSK3A inhibitor BRD0705, BRD0320 and BRD3731.

| #                                                                 | GeneID | Gene Symbol | U937.av.log2FPKM.Ctr | U937.av.log2FPKM.BRD0320 | U937.log2FC.BRD0320.vs.Ctr | U937.SNR.BRD0320.vs.Ctr | U937.Pvalue.BRD0320.vs.Ctr | U937.FDR.BRD0320.vs.Ctr | U937.BRD0705.vs.Ctr | U937.BRD0320.vs.Ctr | U937.BRD3731.vs.Ctr |
|-------------------------------------------------------------------|--------|-------------|----------------------|--------------------------|----------------------------|-------------------------|----------------------------|-------------------------|---------------------|---------------------|---------------------|
| <b>Genes with expression down-regulated by BRD0320 vs Control</b> |        |             |                      |                          |                            |                         |                            |                         |                     |                     |                     |
| 1                                                                 | 30394  | JA760600    | 4.46                 | 0.68                     | -3.77                      | -2.42                   | 0.00                       | 0.00                    | DN                  | DN                  | 0                   |
| 2                                                                 | 11964  | AB062083    | 2.64                 | 0.00                     | -2.64                      | -4.67                   | 0.00                       | 0.01                    | DN                  | DN                  | 0                   |
| 3                                                                 | 9307   | KIAA0855    | 3.09                 | 1.03                     | -2.06                      | -0.68                   | 0.04                       | 0.04                    | DN                  | DN                  | 0                   |
| 4                                                                 | 30665  | CXorf21     | 5.30                 | 3.29                     | -2.02                      | -13.66                  | 0.00                       | 0.00                    | 0                   | DN                  | 0                   |
| 5                                                                 | 27552  | PIK3CG      | 4.45                 | 2.47                     | -1.98                      | -15.01                  | 0.01                       | 0.01                    | DN                  | DN                  | DN                  |
| 6                                                                 | 27553  | PRKAR2B     | 3.26                 | 1.33                     | -1.93                      | -8.36                   | 0.01                       | 0.01                    | DN                  | DN                  | DN                  |
| 7                                                                 | 3867   | PDCD4       | 5.37                 | 3.45                     | -1.92                      | -5.39                   | 0.00                       | 0.00                    | DN                  | DN                  | DN                  |
| 8                                                                 | 6148   | P27_CRE     | 1.89                 | 0.00                     | -1.89                      | -1.15                   | 0.04                       | 0.05                    | DN                  | DN                  | 0                   |
| 9                                                                 | 21758  | ART3        | 3.11                 | 1.36                     | -1.75                      | -5.96                   | 0.00                       | 0.00                    | DN                  | DN                  | 0                   |
| 10                                                                | 6526   | NFE2        | 2.98                 | 1.24                     | -1.74                      | -7.96                   | 0.01                       | 0.01                    | DN                  | DN                  | DN                  |
| 11                                                                | 10899  | UBALD1      | 4.36                 | 2.63                     | -1.73                      | -7.41                   | 0.00                       | 0.01                    | DN                  | DN                  | DN                  |
| 12                                                                | 28923  | MYC         | 7.30                 | 5.58                     | -1.72                      | -30.12                  | 0.01                       | 0.00                    | 0                   | DN                  | DN                  |
| 13                                                                | 30993  | mir-223     | 3.60                 | 1.91                     | -1.69                      | -4.18                   | 0.00                       | 0.00                    | DN                  | DN                  | 0                   |
| 14                                                                | 27185  | LAT2        | 6.25                 | 4.58                     | -1.67                      | -20.33                  | 0.01                       | 0.01                    | DN                  | DN                  | DN                  |
| 15                                                                | 20383  | MIR4444-1   | 2.69                 | 1.03                     | -1.66                      | -1.28                   | 0.01                       | 0.01                    | 0                   | DN                  | 0                   |
| 16                                                                | 18206  | TP53INP2    | 3.87                 | 2.33                     | -1.55                      | -6.99                   | 0.01                       | 0.00                    | DN                  | DN                  | DN                  |
| 17                                                                | 28472  | PCMTD1      | 3.17                 | 1.65                     | -1.52                      | -4.10                   | 0.00                       | 0.01                    | DN                  | DN                  | 0                   |
| 18                                                                | 7792   | TNFSF13B    | 6.80                 | 5.28                     | -1.52                      | -11.98                  | 0.01                       | 0.01                    | DN                  | DN                  | 0                   |
| 19                                                                | 24842  | PNRC1       | 3.58                 | 2.07                     | -1.51                      | -6.69                   | 0.01                       | 0.01                    | DN                  | DN                  | DN                  |
| 20                                                                | 22931  | ST8SIA4     | 3.07                 | 1.56                     | -1.51                      | -20.23                  | 0.00                       | 0.00                    | DN                  | DN                  | DN                  |

| #  | GeneID | Gene Symbol | U937.av.log2FPKM.Ctr | U937.av.log2FPKM.BRD0320 | <b>U937.log2FC.BRD0320.vs.Ctr</b> | U937.SNR.BRD0320.vs.Ctr | U937.Pvalue.BRD0320.vs.Ctr | U937.FDR.BRD0320.vs.Ctr | U937.BRD0705.vs.Ctr | <b>U937.BRD0320.vs.Ctr</b> | U937.BRD3731.vs.Ctr |
|----|--------|-------------|----------------------|--------------------------|-----------------------------------|-------------------------|----------------------------|-------------------------|---------------------|----------------------------|---------------------|
| 21 | 26816  | C7orf41     | 2.77                 | 1.27                     | -1.50                             | -5.75                   | 0.01                       | 0.01                    | DN                  | DN                         | 0                   |
| 22 | 11873  | AK302511    | 3.68                 | 2.21                     | -1.46                             | -1.32                   | 0.01                       | 0.00                    | DN                  | DN                         | 0                   |
| 23 | 1163   | SNORA66     | 1.98                 | 0.54                     | -1.44                             | -1.01                   | 0.01                       | 0.01                    | 0                   | DN                         | 0                   |
| 24 | 5987   | ING4        | 2.97                 | 1.55                     | -1.42                             | -4.99                   | 0.01                       | 0.00                    | DN                  | DN                         | 0                   |
| 25 | 23158  | PAIP2       | 5.82                 | 4.40                     | -1.42                             | -9.32                   | 0.00                       | 0.00                    | DN                  | DN                         | DN                  |
| 26 | 12907  | ETV4        | 3.86                 | 2.44                     | -1.42                             | -4.00                   | 0.01                       | 0.00                    | 0                   | DN                         | 0                   |
| 27 | 6224   | LRMP        | 2.85                 | 1.46                     | -1.40                             | -11.36                  | 0.00                       | 0.01                    | DN                  | DN                         | 0                   |
| 28 | 15930  | MIR4754     | 1.39                 | 0.00                     | -1.39                             | -2.85                   | 0.01                       | 0.00                    | 0                   | DN                         | 0                   |
| 29 | 15195  | CEACAM4     | 2.78                 | 1.40                     | -1.38                             | -12.58                  | 0.01                       | 0.01                    | DN                  | DN                         | DN                  |
| 30 | 8190   | MIS18BP1    | 5.23                 | 3.86                     | -1.38                             | -27.61                  | 0.01                       | 0.00                    | DN                  | DN                         | DN                  |
| 31 | 9782   | DQ599965    | 3.97                 | 2.59                     | -1.37                             | -0.97                   | 0.00                       | 0.00                    | DN                  | DN                         | 0                   |
| 32 | 997    | PDE4B       | 2.57                 | 1.21                     | -1.37                             | -10.76                  | 0.00                       | 0.00                    | DN                  | DN                         | 0                   |
| 33 | 8618   | ATXN3       | 3.24                 | 1.88                     | -1.36                             | -6.46                   | 0.00                       | 0.00                    | DN                  | DN                         | DN                  |
| 34 | 10881  | NLRC3       | 2.68                 | 1.32                     | -1.36                             | -7.30                   | 0.00                       | 0.01                    | DN                  | DN                         | DN                  |
| 35 | 7358   | RASL11A     | 3.46                 | 2.10                     | -1.36                             | -7.98                   | 0.00                       | 0.00                    | 0                   | DN                         | 0                   |
| 36 | 14668  | HSH2D       | 2.76                 | 1.40                     | -1.36                             | -5.36                   | 0.00                       | 0.00                    | 0                   | DN                         | DN                  |
| 37 | 21788  | ANTXR2      | 4.74                 | 3.40                     | -1.34                             | -9.14                   | 0.01                       | 0.01                    | DN                  | DN                         | DN                  |
| 38 | 10951  | RM12        | 4.73                 | 3.39                     | -1.34                             | -12.13                  | 0.00                       | 0.00                    | DN                  | DN                         | 0                   |
| 39 | 19985  | WDR48       | 4.22                 | 2.89                     | -1.33                             | -11.89                  | 0.01                       | 0.01                    | DN                  | DN                         | DN                  |
| 40 | 13178  | YPEL2       | 2.43                 | 1.11                     | -1.33                             | -9.82                   | 0.01                       | 0.01                    | DN                  | DN                         | 0                   |
| 41 | 4250   | TRIM22      | 2.53                 | 1.21                     | -1.32                             | -5.45                   | 0.01                       | 0.00                    | DN                  | DN                         | 0                   |
| 42 | 8368   | TMEM229B    | 3.51                 | 2.21                     | -1.31                             | -2.95                   | 0.00                       | 0.01                    | DN                  | DN                         | 0                   |
| 43 | 4076   | IFITM1      | 3.42                 | 2.12                     | -1.30                             | -6.50                   | 0.01                       | 0.01                    | DN                  | DN                         | DN                  |
| 44 | 21066  | KLHL24      | 2.28                 | 0.99                     | -1.29                             | -9.10                   | 0.01                       | 0.00                    | DN                  | DN                         | 0                   |
| 45 | 20672  | ABTB1       | 1.60                 | 0.30                     | -1.29                             | -5.65                   | 0.01                       | 0.01                    | DN                  | DN                         | DN                  |
| 46 | 25134  | CCDC28A     | 3.73                 | 2.45                     | -1.29                             | -8.68                   | 0.01                       | 0.00                    | DN                  | DN                         | DN                  |
| 47 | 23181  | EIF4EBP3    | 3.03                 | 1.73                     | -1.29                             | -2.81                   | 0.00                       | 0.00                    | DN                  | DN                         | 0                   |
| 48 | 11145  | DQ583840    | 1.62                 | 0.33                     | -1.29                             | -1.42                   | 0.01                       | 0.01                    | 0                   | DN                         | 0                   |
| 49 | 28849  | DEPTOR      | 2.51                 | 1.23                     | -1.27                             | -5.84                   | 0.01                       | 0.01                    | DN                  | DN                         | DN                  |
| 50 | 1793   | PBXIP1      | 3.10                 | 1.83                     | -1.27                             | -8.42                   | 0.00                       | 0.01                    | DN                  | DN                         | DN                  |
| 51 | 19886  | SATB1       | 6.20                 | 4.93                     | -1.27                             | -21.57                  | 0.01                       | 0.00                    | 0                   | DN                         | 0                   |
| 52 | 17383  | SLC40A1     | 2.01                 | 0.75                     | -1.26                             | -4.15                   | 0.01                       | 0.00                    | DN                  | DN                         | 0                   |
| 53 | 21244  | FAM157A     | 2.86                 | 1.59                     | -1.26                             | -1.43                   | 0.00                       | 0.00                    | DN                  | DN                         | 0                   |
| 54 | 3706   | FRAT1       | 2.59                 | 1.35                     | -1.25                             | -8.92                   | 0.00                       | 0.01                    | DN                  | DN                         | DN                  |
| 55 | 28477  | RB1CC1      | 4.14                 | 2.91                     | -1.24                             | -8.84                   | 0.00                       | 0.01                    | DN                  | DN                         | DN                  |
| 56 | 14219  | C19orf77    | 2.14                 | 0.90                     | -1.24                             | -5.22                   | 0.01                       | 0.00                    | 0                   | DN                         | 0                   |
| 57 | 2643   | CABC1       | 5.50                 | 4.27                     | -1.23                             | -17.97                  | 0.01                       | 0.01                    | DN                  | DN                         | 0                   |

| #  | GeneID | Gene Symbol  | U937.av.log2FPKM.Ctr | U937.av.log2FPKM.BRD0320 | <b>U937.log2FC.BRD0320.vs.Ctr</b> | U937.SNR.BRD0320.vs.Ctr | U937.Pvalue.BRD0320.vs.Ctr | U937.FDR.BRD0320.vs.Ctr | U937.BRD0705.vs.Ctr | <b>U937.BRD0320.vs.Ctr</b> | U937.BRD3731.vs.Ctr |
|----|--------|--------------|----------------------|--------------------------|-----------------------------------|-------------------------|----------------------------|-------------------------|---------------------|----------------------------|---------------------|
| 58 | 397    | HSPG2        | 2.40                 | 1.17                     | -1.23                             | -3.03                   | 0.01                       | 0.01                    | 0                   | DN                         | 0                   |
| 59 | 11872  | AX747598     | 2.87                 | 1.65                     | -1.22                             | -3.31                   | 0.01                       | 0.01                    | DN                  | DN                         | 0                   |
| 60 | 22449  | ROPN1L       | 2.09                 | 0.88                     | -1.21                             | -7.20                   | 0.01                       | 0.00                    | DN                  | DN                         | DN                  |
| 61 | 12762  | IGFBP4       | 4.38                 | 3.16                     | -1.21                             | -18.08                  | 0.00                       | 0.00                    | 0                   | DN                         | 0                   |
| 62 | 13428  | UBALD2       | 4.09                 | 2.88                     | -1.20                             | -7.52                   | 0.00                       | 0.00                    | DN                  | DN                         | DN                  |
| 63 | 17478  | FAM117B      | 1.91                 | 0.72                     | -1.20                             | -11.12                  | 0.01                       | 0.00                    | DN                  | DN                         | 0                   |
| 64 | 687    | MYCBP        | 4.66                 | 3.47                     | -1.20                             | -10.59                  | 0.01                       | 0.01                    | 0                   | DN                         | 0                   |
| 65 | 9502   | ATP8B4       | 5.44                 | 4.23                     | -1.20                             | -10.06                  | 0.01                       | 0.01                    | 0                   | DN                         | DN                  |
| 66 | 19694  | MLC1         | 4.07                 | 2.88                     | -1.19                             | -8.01                   | 0.00                       | 0.00                    | 0                   | DN                         | 0                   |
| 67 | 11757  | WFDC1        | 3.36                 | 2.17                     | -1.19                             | -4.25                   | 0.01                       | 0.01                    | 0                   | DN                         | 0                   |
| 68 | 28109  | DEFB1        | 5.14                 | 3.95                     | -1.19                             | -9.05                   | 0.00                       | 0.01                    | 0                   | DN                         | 0                   |
| 69 | 11714  | NUDT7        | 2.78                 | 1.60                     | -1.18                             | -6.54                   | 0.00                       | 0.00                    | DN                  | DN                         | 0                   |
| 70 | 27191  | NCF1         | 2.97                 | 1.79                     | -1.18                             | -23.93                  | 0.00                       | 0.00                    | 0                   | DN                         | DN                  |
| 71 | 12477  | SNORD42A     | 1.60                 | 0.43                     | -1.17                             | -1.00                   | 0.01                       | 0.00                    | DN                  | DN                         | 0                   |
| 72 | 16379  | BCL11A       | 3.68                 | 2.51                     | -1.17                             | -5.11                   | 0.01                       | 0.01                    | 0                   | DN                         | 0                   |
| 73 | 30363  | NRARP        | 2.76                 | 1.59                     | -1.17                             | -8.50                   | 0.00                       | 0.01                    | 0                   | DN                         | 0                   |
| 74 | 4065   | AL137655     | 2.69                 | 1.53                     | -1.16                             | -1.55                   | 0.00                       | 0.01                    | DN                  | DN                         | 0                   |
| 75 | 27554  | HBP1         | 3.53                 | 2.37                     | -1.16                             | -7.43                   | 0.00                       | 0.01                    | DN                  | DN                         | 0                   |
| 76 | 643    | AGO4         | 3.36                 | 2.20                     | -1.16                             | -8.60                   | 0.01                       | 0.01                    | DN                  | DN                         | 0                   |
| 77 | 18622  | PCMTD2       | 3.34                 | 2.18                     | -1.16                             | -6.34                   | 0.00                       | 0.01                    | DN                  | DN                         | 0                   |
| 78 | 30335  | FUT7         | 3.71                 | 2.55                     | -1.16                             | -18.73                  | 0.01                       | 0.01                    | 0                   | DN                         | DN                  |
| 79 | 21773  | CCNG2        | 2.57                 | 1.42                     | -1.15                             | -6.22                   | 0.01                       | 0.01                    | DN                  | DN                         | 0                   |
| 80 | 20067  | LZTFL1       | 3.73                 | 2.60                     | -1.14                             | -9.63                   | 0.01                       | 0.00                    | DN                  | DN                         | 0                   |
| 81 | 380    | CDA          | 5.42                 | 4.28                     | -1.14                             | -11.11                  | 0.01                       | 0.00                    | 0                   | DN                         | DN                  |
| 82 | 7759   | TMTC4        | 3.92                 | 2.78                     | -1.14                             | -14.48                  | 0.01                       | 0.01                    | 0                   | DN                         | 0                   |
| 83 | 6370   | RHEBL1       | 2.51                 | 1.38                     | -1.13                             | -4.71                   | 0.01                       | 0.01                    | DN                  | DN                         | 0                   |
| 84 | 2283   | EDEM3        | 5.50                 | 4.37                     | -1.13                             | -11.45                  | 0.00                       | 0.00                    | 0                   | DN                         | 0                   |
| 85 | 23649  | SERPINB1     | 7.19                 | 6.06                     | -1.13                             | -9.73                   | 0.01                       | 0.01                    | 0                   | DN                         | DN                  |
| 86 | 18479  | FAM210B      | 3.65                 | 2.53                     | -1.12                             | -9.61                   | 0.01                       | 0.00                    | DN                  | DN                         | 0                   |
| 87 | 22163  | TLR2         | 3.07                 | 1.96                     | -1.11                             | -2.30                   | 0.01                       | 0.01                    | DN                  | DN                         | 0                   |
| 88 | 10266  | AK055981     | 2.39                 | 1.29                     | -1.11                             | -6.76                   | 0.00                       | 0.00                    | DN                  | DN                         | 0                   |
| 89 | 9634   | FLJ27352     | 1.90                 | 0.79                     | -1.11                             | -2.74                   | 0.00                       | 0.00                    | DN                  | DN                         | 0                   |
| 90 | 19595  | NFAM1        | 3.68                 | 2.57                     | -1.11                             | -9.12                   | 0.01                       | 0.00                    | 0                   | DN                         | 0                   |
| 91 | 23625  | LOC100133331 | 3.37                 | 2.26                     | -1.10                             | -0.94                   | 0.01                       | 0.01                    | DN                  | DN                         | 0                   |
| 92 | 7671   | POU4F1       | 3.33                 | 2.23                     | -1.10                             | -7.98                   | 0.00                       | 0.01                    | 0                   | DN                         | 0                   |
| 93 | 17722  | SNORD82      | 1.10                 | 0.00                     | -1.10                             | -31.84                  | 0.01                       | 0.01                    | 0                   | DN                         | 0                   |
| 94 | 24447  | DQ591995     | 4.39                 | 3.28                     | -1.10                             | -3.99                   | 0.01                       | 0.01                    | 0                   | DN                         | 0                   |

| #   | GeneID | Gene Symbol  | U937.av.log2FPKM.Ctr | U937.av.log2FPKM.BRD0320 | <b>U937.log2FC.BRD0320.vs.Ctr</b> | U937.SNR.BRD0320.vs.Ctr | U937.Pvalue.BRD0320.vs.Ctr | U937.FDR.BRD0320.vs.Ctr | U937.BRD0705.vs.Ctr | <b>U937.BRD0320.vs.Ctr</b> | U937.BRD3731.vs.Ctr |
|-----|--------|--------------|----------------------|--------------------------|-----------------------------------|-------------------------|----------------------------|-------------------------|---------------------|----------------------------|---------------------|
| 95  | 3614   | HV303525     | 1.46                 | 0.36                     | -1.10                             | -1.09                   | 0.00                       | 0.01                    | 0                   | DN                         | 0                   |
| 96  | 30588  | U4           | 1.78                 | 0.69                     | -1.09                             | -1.09                   | 0.01                       | 0.01                    | DN                  | DN                         | 0                   |
| 97  | 6      | LOC729737    | 4.49                 | 3.40                     | -1.09                             | -1.87                   | 0.00                       | 0.00                    | DN                  | DN                         | 0                   |
| 98  | 18109  | ACSS1        | 5.63                 | 4.53                     | -1.09                             | -14.37                  | 0.00                       | 0.00                    | 0                   | DN                         | 0                   |
| 99  | 9203   | FLJ00278     | 2.87                 | 1.79                     | -1.08                             | -1.03                   | 0.00                       | 0.00                    | DN                  | DN                         | 0                   |
| 100 | 28017  | NUB1         | 4.79                 | 3.72                     | -1.08                             | -2.98                   | 0.00                       | 0.01                    | DN                  | DN                         | DN                  |
| 101 | 6500   | CALCOCO1     | 2.18                 | 1.11                     | -1.07                             | -9.35                   | 0.00                       | 0.00                    | DN                  | DN                         | DN                  |
| 102 | 6094   | CLEC12A      | 5.70                 | 4.62                     | -1.07                             | -12.51                  | 0.00                       | 0.00                    | 0                   | DN                         | 0                   |
| 103 | 28082  | AK056623     | 1.63                 | 0.57                     | -1.06                             | -8.16                   | 0.00                       | 0.00                    | DN                  | DN                         | 0                   |
| 104 | 20244  | SEMA3G       | 2.08                 | 1.02                     | -1.06                             | -11.19                  | 0.00                       | 0.01                    | 0                   | DN                         | DN                  |
| 105 | 8134   | EAPP         | 4.13                 | 3.09                     | -1.05                             | -6.59                   | 0.01                       | 0.00                    | DN                  | DN                         | DN                  |
| 106 | 4064   | LOC100133161 | 3.48                 | 2.43                     | -1.05                             | -1.31                   | 0.01                       | 0.01                    | DN                  | DN                         | 0                   |
| 107 | 13112  | MBTD1        | 3.30                 | 2.26                     | -1.05                             | -5.43                   | 0.01                       | 0.01                    | DN                  | DN                         | 0                   |
| 108 | 507    | WDTC1        | 3.71                 | 2.66                     | -1.05                             | -15.71                  | 0.01                       | 0.00                    | DN                  | DN                         | DN                  |
| 109 | 4923   | MS4A7        | 3.48                 | 2.43                     | -1.05                             | -8.57                   | 0.00                       | 0.01                    | DN                  | DN                         | 0                   |
| 110 | 20488  | BBX          | 3.65                 | 2.60                     | -1.05                             | -14.73                  | 0.01                       | 0.01                    | 0                   | DN                         | 0                   |
| 111 | 9509   | BX537481     | 1.90                 | 0.87                     | -1.03                             | -0.99                   | 0.01                       | 0.01                    | DN                  | DN                         | 0                   |
| 112 | 19942  | EF565122     | 1.60                 | 0.57                     | -1.03                             | -3.48                   | 0.00                       | 0.01                    | 0                   | DN                         | 0                   |
| 113 | 27203  | GTF2IP1      | 4.12                 | 3.10                     | -1.02                             | -3.42                   | 0.01                       | 0.00                    | DN                  | DN                         | 0                   |
| 114 | 21300  | MXD4         | 2.36                 | 1.35                     | -1.01                             | -2.53                   | 0.00                       | 0.00                    | DN                  | DN                         | DN                  |
| 115 | 30174  | AL049935     | 5.13                 | 4.12                     | -1.01                             | -8.27                   | 0.00                       | 0.01                    | 0                   | DN                         | 0                   |
| 116 | 6089   | CD69         | 4.18                 | 3.17                     | -1.01                             | -7.13                   | 0.00                       | 0.00                    | 0                   | DN                         | 0                   |
| 117 | 15198  | CEACAM6      | 1.16                 | 0.16                     | -1.00                             | -4.58                   | 0.00                       | 0.00                    | DN                  | DN                         | DN                  |
| 118 | 10743  | SPSB3        | 3.51                 | 2.50                     | -1.00                             | -11.54                  | 0.01                       | 0.00                    | DN                  | DN                         | DN                  |
| 119 | 13967  | RAB27B       | 4.14                 | 3.14                     | -1.00                             | -7.57                   | 0.00                       | 0.00                    | DN                  | DN                         | 0                   |
| 120 | 9221   | ULK4P1       | 1.88                 | 0.88                     | -1.00                             | -2.10                   | 0.00                       | 0.01                    | 0                   | DN                         | 0                   |
| 121 | 19612  | BIK          | 3.10                 | 2.10                     | -1.00                             | -5.89                   | 0.01                       | 0.00                    | 0                   | DN                         | 0                   |
| 122 | 6530   | ZNF385A      | 2.60                 | 1.59                     | -1.00                             | -15.77                  | 0.00                       | 0.00                    | 0                   | DN                         | DN                  |
| 123 | 31455  | ARHGEF6      | 6.12                 | 5.12                     | -1.00                             | -10.61                  | 0.01                       | 0.00                    | 0                   | DN                         | 0                   |
| 124 | 14091  | FLJ45445     | 3.00                 | 2.00                     | -1.00                             | -2.35                   | 0.01                       | 0.00                    | 0                   | DN                         | 0                   |
| 125 | 27808  | KIAA1147     | 3.14                 | 2.14                     | -1.00                             | -11.65                  | 0.01                       | 0.01                    | 0                   | DN                         | 0                   |
| 126 | 1516   | NBPF24       | 1.95                 | 0.96                     | -0.99                             | -2.05                   | 0.00                       | 0.00                    | DN                  | DN                         | 0                   |
| 127 | 3899   | FAM160B1     | 3.10                 | 2.11                     | -0.99                             | -4.68                   | 0.01                       | 0.01                    | DN                  | DN                         | 0                   |
| 128 | 17896  | SIRPD        | 1.80                 | 0.82                     | -0.99                             | -3.21                   | 0.00                       | 0.00                    | 0                   | DN                         | 0                   |
| 129 | 2177   | SNORD44      | 3.66                 | 2.68                     | -0.99                             | -1.26                   | 0.00                       | 0.01                    | 0                   | DN                         | 0                   |
| 130 | 30247  | BRD3         | 3.69                 | 2.70                     | -0.99                             | -6.89                   | 0.00                       | 0.00                    | 0                   | DN                         | DN                  |
| 131 | 27202  | NCF1C        | 2.04                 | 1.05                     | -0.99                             | -5.23                   | 0.01                       | 0.01                    | 0                   | DN                         | DN                  |

| #   | GeneID | Gene Symbol | U937.av.log2FPKM.Ctr | U937.av.log2FPKM.BRD0320 | U937.log2FC.BRD0320.vs.Ctr | U937.SNR.BRD0320.vs.Ctr | U937.Pvalue.BRD0320.vs.Ctr | U937.FDR.BRD0320.vs.Ctr | U937.BRD0705.vs.Ctr | U937.BRD0320.vs.Ctr | U937.BRD3731.vs.Ctr |
|-----|--------|-------------|----------------------|--------------------------|----------------------------|-------------------------|----------------------------|-------------------------|---------------------|---------------------|---------------------|
| 132 | 29365  | TPM2        | 3.60                 | 2.62                     | -0.98                      | -1.66                   | 0.01                       | 0.01                    | DN                  | DN                  | 0                   |
| 133 | 2410   | ATP2B4      | 4.59                 | 3.61                     | -0.98                      | -11.69                  | 0.01                       | 0.01                    | 0                   | DN                  | 0                   |
| 134 | 6480   | ZNF740      | 3.18                 | 2.21                     | -0.98                      | -12.34                  | 0.00                       | 0.01                    | 0                   | DN                  | 0                   |
| 135 | 16308  | CRIP1       | 3.03                 | 2.05                     | -0.98                      | -6.56                   | 0.00                       | 0.00                    | 0                   | DN                  | 0                   |
| 136 | 19     | DQ575786    | 0.97                 | 0.00                     | -0.97                      | -3.48                   | 0.01                       | 0.00                    | 0                   | DN                  | 0                   |
| 137 | 2591   | DQ600234    | 0.97                 | 0.00                     | -0.97                      | -3.48                   | 0.00                       | 0.00                    | 0                   | DN                  | 0                   |
| 138 | 28320  | BNIP3L      | 3.98                 | 3.02                     | -0.96                      | -5.47                   | 0.00                       | 0.00                    | DN                  | DN                  | DN                  |
| 139 | 31780  | CD24        | 2.13                 | 1.17                     | -0.96                      | -3.51                   | 0.01                       | 0.01                    | DN                  | DN                  | 0                   |
| 140 | 7430   | CCNA1       | 6.07                 | 5.10                     | -0.96                      | -10.52                  | 0.01                       | 0.00                    | DN                  | DN                  | 0                   |
| 141 | 20339  | ADAMTS9     | 2.05                 | 1.09                     | -0.96                      | -5.57                   | 0.01                       | 0.00                    | 0                   | DN                  | 0                   |
| 142 | 448    | NIPAL3      | 2.32                 | 1.37                     | -0.95                      | -9.27                   | 0.00                       | 0.00                    | DN                  | DN                  | 0                   |
| 143 | 6096   | CLEC12B     | 3.24                 | 2.29                     | -0.95                      | -5.14                   | 0.01                       | 0.00                    | DN                  | DN                  | 0                   |
| 144 | 8216   | SOS2        | 3.38                 | 2.43                     | -0.95                      | -3.20                   | 0.00                       | 0.01                    | DN                  | DN                  | DN                  |
| 145 | 15525  | Mir_324     | 1.30                 | 0.34                     | -0.95                      | -1.05                   | 0.01                       | 0.01                    | 0                   | DN                  | 0                   |
| 146 | 14367  | CTXN1       | 3.23                 | 2.28                     | -0.95                      | -3.92                   | 0.00                       | 0.00                    | 0                   | DN                  | DN                  |
| 147 | 13244  | LIMD2       | 2.59                 | 1.64                     | -0.95                      | -4.29                   | 0.01                       | 0.00                    | 0                   | DN                  | DN                  |
| 148 | 6696   | MSRB3       | 4.42                 | 3.47                     | -0.95                      | -6.26                   | 0.01                       | 0.01                    | 0                   | DN                  | 0                   |
| 149 | 29515  | CBWD6       | 5.18                 | 4.23                     | -0.95                      | -2.59                   | 0.00                       | 0.01                    | 0                   | DN                  | 0                   |
| 150 | 9267   | GOLGA8O     | 7.16                 | 6.21                     | -0.95                      | -5.15                   | 0.01                       | 0.01                    | 0                   | DN                  | 0                   |
| 151 | 8272   | PELI2       | 2.25                 | 1.31                     | -0.95                      | -11.29                  | 0.00                       | 0.01                    | 0                   | DN                  | 0                   |
| 152 | 3341   | TET1        | 1.30                 | 0.36                     | -0.94                      | -1.88                   | 0.01                       | 0.00                    | DN                  | DN                  | 0                   |
| 153 | 593    | TSSK3       | 2.09                 | 1.15                     | -0.94                      | -2.87                   | 0.00                       | 0.00                    | DN                  | DN                  | 0                   |
| 154 | 5726   | SORL1       | 4.45                 | 3.51                     | -0.94                      | -6.29                   | 0.00                       | 0.01                    | 0                   | DN                  | 0                   |
| 155 | 22820  | SCAMP1      | 3.96                 | 3.02                     | -0.94                      | -15.70                  | 0.00                       | 0.00                    | 0                   | DN                  | 0                   |
| 156 | 23186  | TMCO6       | 3.30                 | 2.36                     | -0.94                      | -3.23                   | 0.00                       | 0.00                    | 0                   | DN                  | 0                   |
| 157 | 1001   | AK298300    | 2.30                 | 1.37                     | -0.93                      | -1.39                   | 0.01                       | 0.00                    | DN                  | DN                  | 0                   |
| 158 | 27411  | MIR25       | 2.50                 | 1.57                     | -0.93                      | -1.14                   | 0.01                       | 0.00                    | DN                  | DN                  | 0                   |
| 159 | 16690  | AK057596    | 3.24                 | 2.31                     | -0.93                      | -1.24                   | 0.00                       | 0.01                    | DN                  | DN                  | 0                   |
| 160 | 24446  | DQ572964    | 5.09                 | 4.15                     | -0.93                      | -3.70                   | 0.00                       | 0.00                    | 0                   | DN                  | 0                   |
| 161 | 21979  | NDST3       | 1.17                 | 0.24                     | -0.93                      | -3.88                   | 0.01                       | 0.00                    | 0                   | DN                  | 0                   |
| 162 | 28081  | FBXO25      | 3.38                 | 2.46                     | -0.93                      | -6.51                   | 0.00                       | 0.00                    | 0                   | DN                  | 0                   |
| 163 | 9275   | AK310041    | 2.46                 | 1.53                     | -0.93                      | -1.75                   | 0.00                       | 0.00                    | 0                   | DN                  | 0                   |
| 164 | 29717  | AUH         | 2.71                 | 1.79                     | -0.92                      | -2.21                   | 0.00                       | 0.01                    | DN                  | DN                  | DN                  |
| 165 | 14120  | PRTN3       | 8.66                 | 7.74                     | -0.92                      | -14.75                  | 0.01                       | 0.00                    | 0                   | DN                  | 0                   |
| 166 | 10698  | FBXL16      | 3.33                 | 2.40                     | -0.92                      | -13.56                  | 0.01                       | 0.00                    | 0                   | DN                  | DN                  |
| 167 | 13585  | NARF        | 4.52                 | 3.61                     | -0.92                      | -5.50                   | 0.01                       | 0.00                    | 0                   | DN                  | 0                   |
| 168 | 10997  | KIAA0430    | 2.65                 | 1.73                     | -0.92                      | -20.19                  | 0.00                       | 0.00                    | 0                   | DN                  | 0                   |

| #   | GeneID | Gene Symbol | U937.av.log2FPKM.Ctr | U937.av.log2FPKM.BRD0320 | <b>U937.log2FC.BRD0320.vs.Ctr</b> | U937.SNR.BRD0320.vs.Ctr | U937.Pvalue.BRD0320.vs.Ctr | U937.FDR.BRD0320.vs.Ctr | U937.BRD0705.vs.Ctr | <b>U937.BRD0320.vs.Ctr</b> | U937.BRD3731.vs.Ctr |
|-----|--------|-------------|----------------------|--------------------------|-----------------------------------|-------------------------|----------------------------|-------------------------|---------------------|----------------------------|---------------------|
| 169 | 9012   | GOLGA8S     | 3.26                 | 2.35                     | -0.91                             | -5.05                   | 0.00                       | 0.01                    | DN                  | DN                         | UP                  |
| 170 | 21109  | DGKG        | 2.44                 | 1.53                     | -0.91                             | -2.65                   | 0.01                       | 0.01                    | 0                   | DN                         | 0                   |
| 171 | 6254   | FAR2        | 4.13                 | 3.22                     | -0.91                             | -9.35                   | 0.00                       | 0.00                    | 0                   | DN                         | 0                   |
| 172 | 25129  | HEBP2       | 6.18                 | 5.27                     | -0.91                             | -19.73                  | 0.01                       | 0.00                    | 0                   | DN                         | 0                   |
| 173 | 13824  | TAF4B       | 3.51                 | 2.60                     | -0.91                             | -12.72                  | 0.01                       | 0.01                    | 0                   | DN                         | 0                   |
| 174 | 26633  | WIPI2       | 4.58                 | 3.68                     | -0.91                             | -7.76                   | 0.01                       | 0.00                    | 0                   | DN                         | DN                  |
| 175 | 23503  | RNF44       | 4.21                 | 3.30                     | -0.91                             | -3.46                   | 0.01                       | 0.01                    | 0                   | DN                         | 0                   |
| 176 | 19165  | YPEL1       | 1.33                 | 0.44                     | -0.90                             | -5.18                   | 0.00                       | 0.01                    | DN                  | DN                         | 0                   |
| 177 | 2387   | KDM5B       | 4.76                 | 3.86                     | -0.90                             | -5.15                   | 0.00                       | 0.00                    | DN                  | DN                         | 0                   |
| 178 | 6993   | UNG         | 5.58                 | 4.68                     | -0.90                             | -10.03                  | 0.00                       | 0.01                    | 0                   | DN                         | 0                   |
| 179 | 29696  | S1PR3       | 2.94                 | 2.04                     | -0.90                             | -5.03                   | 0.01                       | 0.01                    | 0                   | DN                         | 0                   |
| 180 | 25104  | MYB         | 7.89                 | 6.99                     | -0.90                             | -13.71                  | 0.00                       | 0.00                    | 0                   | DN                         | 0                   |
| 181 | 16889  | CBWD2       | 5.48                 | 4.58                     | -0.90                             | -12.06                  | 0.01                       | 0.01                    | 0                   | DN                         | 0                   |
| 182 | 510    | SYTL1       | 2.78                 | 1.88                     | -0.90                             | -3.24                   | 0.01                       | 0.00                    | 0                   | DN                         | 0                   |
| 183 | 29502  | DQ594366    | 4.12                 | 3.23                     | -0.89                             | -1.22                   | 0.01                       | 0.01                    | DN                  | DN                         | 0                   |
| 184 | 23864  | BTN3A1      | 1.61                 | 0.72                     | -0.89                             | -2.24                   | 0.00                       | 0.00                    | DN                  | DN                         | 0                   |
| 185 | 1869   | MEF2D       | 4.63                 | 3.74                     | -0.89                             | -5.15                   | 0.00                       | 0.00                    | 0                   | DN                         | 0                   |
| 186 | 21125  | ST6GAL1     | 4.07                 | 3.18                     | -0.89                             | -6.11                   | 0.00                       | 0.01                    | 0                   | DN                         | 0                   |
| 187 | 7324   | TNFRSF19    | 1.81                 | 0.93                     | -0.89                             | -3.91                   | 0.01                       | 0.01                    | 0                   | DN                         | 0                   |
| 188 | 24274  | RXRB        | 4.57                 | 3.69                     | -0.88                             | -3.55                   | 0.00                       | 0.00                    | DN                  | DN                         | 0                   |
| 189 | 5716   | OAF         | 5.67                 | 4.79                     | -0.88                             | -12.14                  | 0.01                       | 0.00                    | 0                   | DN                         | DN                  |
| 190 | 27728  | PODXL       | 3.97                 | 3.09                     | -0.88                             | -9.01                   | 0.01                       | 0.01                    | 0                   | DN                         | 0                   |
| 191 | 12539  | EVI2A       | 3.95                 | 3.07                     | -0.88                             | -9.18                   | 0.01                       | 0.00                    | 0                   | DN                         | 0                   |
| 192 | 20367  | FOXP1       | 3.13                 | 2.26                     | -0.87                             | -8.09                   | 0.00                       | 0.00                    | DN                  | DN                         | 0                   |
| 193 | 8505   | SPTLC2      | 4.07                 | 3.19                     | -0.87                             | -15.84                  | 0.01                       | 0.00                    | DN                  | DN                         | 0                   |
| 194 | 30143  | ZER1        | 2.16                 | 1.29                     | -0.87                             | -4.86                   | 0.00                       | 0.01                    | DN                  | DN                         | DN                  |
| 195 | 30792  | MIR221      | 0.87                 | 0.00                     | -0.87                             | -2.93                   | 0.01                       | 0.01                    | 0                   | DN                         | 0                   |
| 196 | 5068   | RASGRP2     | 4.88                 | 4.01                     | -0.87                             | -8.64                   | 0.00                       | 0.00                    | 0                   | DN                         | 0                   |
| 197 | 11482  | KATNB1      | 4.15                 | 3.28                     | -0.87                             | -6.45                   | 0.01                       | 0.00                    | 0                   | DN                         | 0                   |
| 198 | 11238  | DOC2A       | 2.23                 | 1.36                     | -0.87                             | -2.37                   | 0.00                       | 0.00                    | 0                   | DN                         | 0                   |
| 199 | 3920   | PDZD8       | 4.74                 | 3.87                     | -0.87                             | -6.39                   | 0.00                       | 0.01                    | 0                   | DN                         | 0                   |
| 200 | 9453   | EIF3J-AS1   | 2.42                 | 1.54                     | -0.87                             | -3.42                   | 0.01                       | 0.01                    | 0                   | DN                         | 0                   |
| 201 | 18846  | BRWD1       | 4.22                 | 3.35                     | -0.87                             | -6.85                   | 0.00                       | 0.00                    | 0                   | DN                         | 0                   |
| 202 | 1906   | CD1D        | 1.40                 | 0.53                     | -0.87                             | -4.50                   | 0.01                       | 0.01                    | 0                   | DN                         | 0                   |
| 203 | 27184  | MIR590      | 1.12                 | 0.25                     | -0.87                             | -0.88                   | 0.01                       | 0.01                    | 0                   | DN                         | 0                   |
| 204 | 20306  | PXK         | 6.67                 | 5.81                     | -0.86                             | -22.41                  | 0.01                       | 0.00                    | 0                   | DN                         | 0                   |
| 205 | 4847   | UBE2L6      | 5.34                 | 4.49                     | -0.86                             | -10.76                  | 0.00                       | 0.01                    | 0                   | DN                         | 0                   |

| #   | GeneID | Gene Symbol   | U937.av.log2FPKM.Ctr | U937.av.log2FPKM.BRD0320 | U937.log2FC.BRD0320.vs.Ctr | U937.SNR.BRD0320.vs.Ctr | U937.Pvalue.BRD0320.vs.Ctr | U937.FDR.BRD0320.vs.Ctr | U937.BRD0705.vs.Ctr | U937.BRD0320.vs.Ctr | U937.BRD3731.vs.Ctr |
|-----|--------|---------------|----------------------|--------------------------|----------------------------|-------------------------|----------------------------|-------------------------|---------------------|---------------------|---------------------|
| 206 | 24844  | PM20D2        | 5.26                 | 4.40                     | -0.86                      | -12.26                  | 0.01                       | 0.00                    | 0                   | DN                  | 0                   |
| 207 | 28374  | WRN           | 4.22                 | 3.36                     | -0.86                      | -2.14                   | 0.01                       | 0.01                    | 0                   | DN                  | 0                   |
| 208 | 30333  | ABCA2         | 1.37                 | 0.51                     | -0.86                      | -4.31                   | 0.01                       | 0.00                    | 0                   | DN                  | DN                  |
| 209 | 26820  | DKFZP586I1420 | 2.12                 | 1.25                     | -0.86                      | -4.14                   | 0.01                       | 0.01                    | 0                   | DN                  | 0                   |
| 210 | 6828   | BTG1          | 3.68                 | 2.82                     | -0.86                      | -7.15                   | 0.01                       | 0.01                    | 0                   | DN                  | 0                   |
| 211 | 27328  | CDK6          | 4.95                 | 4.09                     | -0.86                      | -5.67                   | 0.01                       | 0.00                    | 0                   | DN                  | 0                   |
| 212 | 3154   | CSGALNACT2    | 5.06                 | 4.20                     | -0.86                      | -15.46                  | 0.00                       | 0.00                    | 0                   | DN                  | DN                  |
| 213 | 15190  | B3GNT8        | 2.75                 | 1.90                     | -0.85                      | -3.78                   | 0.01                       | 0.00                    | DN                  | DN                  | DN                  |
| 214 | 2547   | CENPF         | 5.65                 | 4.79                     | -0.85                      | -3.35                   | 0.01                       | 0.01                    | DN                  | DN                  | 0                   |
| 215 | 25114  | MAP3K5        | 3.69                 | 2.84                     | -0.85                      | -4.04                   | 0.00                       | 0.01                    | 0                   | DN                  | 0                   |
| 216 | 2329   | ASPM          | 3.60                 | 2.75                     | -0.85                      | -5.61                   | 0.01                       | 0.00                    | 0                   | DN                  | 0                   |
| 217 | 5080   | ATG2A         | 2.65                 | 1.80                     | -0.85                      | -2.57                   | 0.00                       | 0.00                    | 0                   | DN                  | DN                  |
| 218 | 27198  | AK095583      | 1.28                 | 0.43                     | -0.85                      | -1.76                   | 0.01                       | 0.00                    | 0                   | DN                  | 0                   |
| 219 | 1685   | TDRKH         | 2.92                 | 2.07                     | -0.85                      | -8.44                   | 0.01                       | 0.01                    | 0                   | DN                  | 0                   |
| 220 | 25277  | SNORA20       | 1.69                 | 0.84                     | -0.85                      | -0.80                   | 0.00                       | 0.00                    | 0                   | DN                  | 0                   |
| 221 | 13749  | CHMP1B        | 4.14                 | 3.30                     | -0.84                      | -8.21                   | 0.00                       | 0.01                    | DN                  | DN                  | DN                  |
| 222 | 28748  | SNORA72       | 2.40                 | 1.56                     | -0.84                      | -1.13                   | 0.00                       | 0.00                    | 0                   | DN                  | 0                   |
| 223 | 21443  | CD38          | 2.49                 | 1.65                     | -0.84                      | -4.55                   | 0.00                       | 0.00                    | 0                   | DN                  | 0                   |
| 224 | 27157  | LOC100093631  | 3.27                 | 2.43                     | -0.84                      | -4.79                   | 0.00                       | 0.01                    | 0                   | DN                  | 0                   |
| 225 | 23862  | BTN3A2        | 2.60                 | 1.76                     | -0.84                      | -5.02                   | 0.00                       | 0.00                    | 0                   | DN                  | 0                   |
| 226 | 4081   | SIGIRR        | 3.24                 | 2.40                     | -0.84                      | -14.65                  | 0.00                       | 0.00                    | 0                   | DN                  | 0                   |
| 227 | 7664   | SLAIN1        | 2.61                 | 1.77                     | -0.84                      | -4.10                   | 0.01                       | 0.01                    | 0                   | DN                  | 0                   |
| 228 | 25165  | AX746989      | 2.28                 | 1.45                     | -0.84                      | -1.86                   | 0.01                       | 0.00                    | 0                   | DN                  | 0                   |
| 229 | 18770  | SNORA80       | 1.19                 | 0.36                     | -0.84                      | -1.27                   | 0.00                       | 0.00                    | 0                   | DN                  | 0                   |
| 230 | 21634  | AASDH         | 2.24                 | 1.41                     | -0.83                      | -6.58                   | 0.01                       | 0.01                    | DN                  | DN                  | 0                   |
| 231 | 7941   | ECRP          | 5.26                 | 4.42                     | -0.83                      | -8.24                   | 0.01                       | 0.00                    | 0                   | DN                  | 0                   |
| 232 | 30551  | TMSB4X        | 11.95                | 11.12                    | -0.83                      | -9.92                   | 0.00                       | 0.00                    | 0                   | DN                  | 0                   |
| 233 | 2308   | RGS18         | 4.42                 | 3.59                     | -0.83                      | -5.43                   | 0.01                       | 0.01                    | 0                   | DN                  | 0                   |
| 234 | 21007  | TNFSF10       | 1.52                 | 0.69                     | -0.83                      | -4.31                   | 0.01                       | 0.01                    | 0                   | DN                  | DN                  |
| 235 | 13589  | RAB40B        | 1.58                 | 0.74                     | -0.83                      | -5.22                   | 0.00                       | 0.00                    | 0                   | DN                  | 0                   |
| 236 | 20105  | SMARCC1       | 6.34                 | 5.51                     | -0.83                      | -8.32                   | 0.01                       | 0.00                    | 0                   | DN                  | 0                   |
| 237 | 29992  | CNTRL         | 4.22                 | 3.39                     | -0.83                      | -3.94                   | 0.01                       | 0.01                    | 0                   | DN                  | 0                   |
| 238 | 15423  | CARD8         | 4.54                 | 3.72                     | -0.83                      | -4.59                   | 0.00                       | 0.01                    | 0                   | DN                  | 0                   |
| 239 | 3969   | IKZF5         | 3.33                 | 2.49                     | -0.83                      | -7.91                   | 0.00                       | 0.01                    | 0                   | DN                  | 0                   |
| 240 | 17409  | SLC39A10      | 4.41                 | 3.58                     | -0.83                      | -5.53                   | 0.01                       | 0.00                    | 0                   | DN                  | 0                   |
| 241 | 3896   | ABLIM1        | 2.47                 | 1.65                     | -0.82                      | -3.27                   | 0.00                       | 0.01                    | DN                  | DN                  | 0                   |
| 242 | 19287  | CCDC117       | 3.96                 | 3.13                     | -0.82                      | -6.66                   | 0.00                       | 0.01                    | DN                  | DN                  | 0                   |



| #   | GeneID | Gene Symbol | U937.av.log2FPKM.Ctr | U937.av.log2FPKM.BRD0320 | U937.log2FC.BRD0320.vs.Ctr | U937.SNR.BRD0320.vs.Ctr | U937.Pvalue.BRD0320.vs.Ctr | U937.FDR.BRD0320.vs.Ctr | U937.BRD0705.vs.Ctr | U937.BRD0320.vs.Ctr | U937.BRD3731.vs.Ctr |
|-----|--------|-------------|----------------------|--------------------------|----------------------------|-------------------------|----------------------------|-------------------------|---------------------|---------------------|---------------------|
| 243 | 28     | AK056486    | 1.83                 | 1.01                     | -0.82                      | -1.31                   | 0.01                       | 0.00                    | DN                  | DN                  | 0                   |
| 244 | 1312   | KCNA3       | 2.26                 | 1.45                     | -0.82                      | -3.77                   | 0.00                       | 0.01                    | 0                   | DN                  | 0                   |
| 245 | 20117  | PLXNB1      | 2.17                 | 1.34                     | -0.82                      | -3.38                   | 0.00                       | 0.00                    | 0                   | DN                  | 0                   |
| 246 | 14197  | GNP7        | 3.24                 | 2.43                     | -0.82                      | -7.76                   | 0.01                       | 0.01                    | 0                   | DN                  | 0                   |
| 247 | 6866   | HAL         | 1.75                 | 0.93                     | -0.82                      | -8.67                   | 0.00                       | 0.01                    | 0                   | DN                  | 0                   |
| 248 | 16939  | LOC254128   | 2.39                 | 1.57                     | -0.82                      | -4.23                   | 0.01                       | 0.01                    | 0                   | DN                  | 0                   |
| 249 | 3919   | SLC18A2     | 3.11                 | 2.29                     | -0.82                      | -7.67                   | 0.00                       | 0.00                    | 0                   | DN                  | 0                   |
| 250 | 17752  | INPP5D      | 5.48                 | 4.66                     | -0.82                      | -13.81                  | 0.01                       | 0.00                    | 0                   | DN                  | 0                   |
| 251 | 8588   | FOXN3       | 3.67                 | 2.85                     | -0.82                      | -6.72                   | 0.01                       | 0.01                    | 0                   | DN                  | 0                   |
| 252 | 7514   | ZC3H13      | 5.56                 | 4.75                     | -0.82                      | -5.91                   | 0.01                       | 0.01                    | 0                   | DN                  | DN                  |
| 253 | 14017  | BCL2        | 3.36                 | 2.54                     | -0.82                      | -4.93                   | 0.00                       | 0.01                    | 0                   | DN                  | 0                   |
| 254 | 4018   | EBF3        | 2.22                 | 1.40                     | -0.82                      | -6.16                   | 0.01                       | 0.01                    | 0                   | DN                  | DN                  |
| 255 | 6136   | ETV6        | 3.84                 | 3.02                     | -0.82                      | -5.88                   | 0.01                       | 0.01                    | 0                   | DN                  | 0                   |
| 256 | 29530  | CBWD5       | 1.48                 | 0.68                     | -0.81                      | -1.50                   | 0.01                       | 0.00                    | 0                   | DN                  | 0                   |
| 257 | 30745  | CYBB        | 4.72                 | 3.91                     | -0.81                      | -6.49                   | 0.00                       | 0.00                    | 0                   | DN                  | DN                  |
| 258 | 27672  | PRRT4       | 4.22                 | 3.41                     | -0.81                      | -4.06                   | 0.01                       | 0.01                    | 0                   | DN                  | 0                   |
| 259 | 3750   | ERLIN1      | 7.27                 | 6.46                     | -0.81                      | -20.90                  | 0.00                       | 0.01                    | 0                   | DN                  | 0                   |
| 260 | 21915  | SLC9B2      | 3.37                 | 2.55                     | -0.81                      | -4.52                   | 0.01                       | 0.00                    | 0                   | DN                  | 0                   |
| 261 | 31250  | NXT2        | 4.64                 | 3.83                     | -0.81                      | -5.36                   | 0.01                       | 0.00                    | 0                   | DN                  | 0                   |
| 262 | 2743   | LYST        | 5.23                 | 4.41                     | -0.81                      | -3.71                   | 0.00                       | 0.01                    | 0                   | DN                  | 0                   |
| 263 | 16622  | RMND5A      | 4.46                 | 3.65                     | -0.81                      | -15.32                  | 0.00                       | 0.01                    | 0                   | DN                  | 0                   |
| 264 | 18348  | SERINC3     | 5.37                 | 4.56                     | -0.81                      | -17.31                  | 0.00                       | 0.01                    | 0                   | DN                  | 0                   |
| 265 | 12131  | AX746771    | 1.31                 | 0.51                     | -0.80                      | -1.42                   | 0.01                       | 0.00                    | 0                   | DN                  | 0                   |
| 266 | 7084   | TESC        | 6.48                 | 5.67                     | -0.80                      | -12.61                  | 0.00                       | 0.01                    | 0                   | DN                  | DN                  |
| 267 | 1274   | PSRC1       | 4.53                 | 3.72                     | -0.80                      | -7.87                   | 0.00                       | 0.00                    | 0                   | DN                  | 0                   |
| 268 | 469    | STMN1       | 9.04                 | 8.24                     | -0.80                      | -8.06                   | 0.01                       | 0.01                    | 0                   | DN                  | 0                   |
| 269 | 28093  | KBTBD11     | 6.18                 | 5.39                     | -0.80                      | -23.26                  | 0.00                       | 0.00                    | 0                   | DN                  | 0                   |
| 270 | 14060  | ZADH2       | 4.08                 | 3.27                     | -0.80                      | -15.84                  | 0.01                       | 0.00                    | 0                   | DN                  | DN                  |
| 271 | 17626  | ANKZF1      | 3.72                 | 2.92                     | -0.80                      | -4.04                   | 0.00                       | 0.01                    | 0                   | DN                  | 0                   |
| 272 | 14559  | ZSWIM4      | 1.36                 | 0.56                     | -0.80                      | -5.22                   | 0.00                       | 0.01                    | 0                   | DN                  | 0                   |
| 273 | 13691  | RAB31       | 5.58                 | 4.78                     | -0.80                      | -8.80                   | 0.01                       | 0.00                    | 0                   | DN                  | DN                  |
| 274 | 23138  | BRD8        | 3.93                 | 3.13                     | -0.80                      | -7.61                   | 0.01                       | 0.01                    | 0                   | DN                  | 0                   |
| 275 | 29561  | KLF9        | 1.90                 | 1.10                     | -0.80                      | -4.91                   | 0.01                       | 0.00                    | 0                   | DN                  | 0                   |
| 276 | 9856   | DENND4A     | 3.98                 | 3.19                     | -0.80                      | -3.93                   | 0.01                       | 0.01                    | 0                   | DN                  | 0                   |
| 277 | 19143  | AX748067    | 1.53                 | 0.72                     | -0.80                      | -2.40                   | 0.01                       | 0.00                    | 0                   | DN                  | 0                   |
| 278 | 19738  | CRBN        | 4.30                 | 3.51                     | -0.79                      | -13.52                  | 0.01                       | 0.01                    | DN                  | DN                  | 0                   |
| 279 | 18894  | PDE9A       | 2.85                 | 2.06                     | -0.79                      | -2.57                   | 0.00                       | 0.00                    | 0                   | DN                  | DN                  |

| #   | GeneID | Gene Symbol | U937.av.log2FPKM.Ctr | U937.av.log2FPKM.BRD0320 | U937.log2FC.BRD0320.vs.Ctr | U937.SNR.BRD0320.vs.Ctr | U937.Pvalue.BRD0320.vs.Ctr | U937.FDR.BRD0320.vs.Ctr | U937.BRD0705.vs.Ctr | U937.BRD0320.vs.Ctr | U937.BRD3731.vs.Ctr |
|-----|--------|-------------|----------------------|--------------------------|----------------------------|-------------------------|----------------------------|-------------------------|---------------------|---------------------|---------------------|
| 280 | 6960   | C12orf75    | 4.80                 | 4.01                     | -0.79                      | -7.12                   | 0.00                       | 0.00                    | 0                   | DN                  | 0                   |
| 281 | 25251  | SYNJ2       | 3.49                 | 2.70                     | -0.79                      | -5.36                   | 0.01                       | 0.00                    | 0                   | DN                  | 0                   |
| 282 | 12452  | IFT20       | 3.07                 | 2.28                     | -0.79                      | -3.46                   | 0.00                       | 0.01                    | 0                   | DN                  | 0                   |
| 283 | 21965  | C4orf21     | 2.43                 | 1.64                     | -0.79                      | -3.09                   | 0.00                       | 0.00                    | 0                   | DN                  | 0                   |
| 284 | 10460  | DJ031154    | 3.73                 | 2.93                     | -0.79                      | -1.84                   | 0.00                       | 0.01                    | 0                   | DN                  | 0                   |
| 285 | 2347   | KIF14       | 4.44                 | 3.65                     | -0.79                      | -8.25                   | 0.01                       | 0.00                    | 0                   | DN                  | 0                   |
| 286 | 6704   | IRAK3       | 3.55                 | 2.77                     | -0.79                      | -8.47                   | 0.01                       | 0.00                    | 0                   | DN                  | 0                   |
| 287 | 7659   | MYCBP2      | 5.59                 | 4.81                     | -0.79                      | -2.92                   | 0.01                       | 0.01                    | 0                   | DN                  | 0                   |
| 288 | 22981  | KCNN2       | 4.62                 | 3.83                     | -0.79                      | -10.64                  | 0.01                       | 0.00                    | 0                   | DN                  | 0                   |
| 289 | 27941  | ZNF212      | 2.68                 | 1.89                     | -0.79                      | -6.27                   | 0.00                       | 0.01                    | 0                   | DN                  | 0                   |
| 290 | 13209  | BCAS3       | 1.47                 | 0.69                     | -0.78                      | -3.35                   | 0.00                       | 0.00                    | DN                  | DN                  | DN                  |
| 291 | 16303  | ATP6V1E2    | 2.32                 | 1.54                     | -0.78                      | -4.03                   | 0.01                       | 0.00                    | 0                   | DN                  | 0                   |
| 292 | 15446  | CA11        | 1.89                 | 1.11                     | -0.78                      | -4.63                   | 0.00                       | 0.01                    | 0                   | DN                  | 0                   |
| 293 | 18168  | C20orf112   | 3.06                 | 2.28                     | -0.78                      | -4.36                   | 0.00                       | 0.00                    | 0                   | DN                  | 0                   |
| 294 | 8235   | GNG2        | 3.20                 | 2.42                     | -0.78                      | -6.86                   | 0.00                       | 0.00                    | 0                   | DN                  | 0                   |
| 295 | 28342  | ZNF395      | 4.92                 | 4.13                     | -0.78                      | -8.77                   | 0.01                       | 0.00                    | 0                   | DN                  | DN                  |
| 296 | 17118  | KYNU        | 2.82                 | 2.05                     | -0.78                      | -2.77                   | 0.01                       | 0.01                    | 0                   | DN                  | 0                   |
| 297 | 8174   | CTAGE5      | 3.06                 | 2.28                     | -0.78                      | -4.11                   | 0.00                       | 0.01                    | 0                   | DN                  | 0                   |
| 298 | 27158  | NCF1B       | 1.13                 | 0.35                     | -0.78                      | -1.85                   | 0.01                       | 0.00                    | 0                   | DN                  | DN                  |
| 299 | 3866   | PDCD4-AS1   | 1.36                 | 0.59                     | -0.78                      | -3.32                   | 0.01                       | 0.00                    | 0                   | DN                  | 0                   |
| 300 | 15990  | CMPK2       | 2.32                 | 1.55                     | -0.77                      | -3.09                   | 0.00                       | 0.01                    | 0                   | DN                  | 0                   |
| 301 | 19519  | SUN2        | 5.85                 | 5.08                     | -0.77                      | -7.95                   | 0.00                       | 0.00                    | 0                   | DN                  | 0                   |
| 302 | 21108  | ETV5        | 4.30                 | 3.53                     | -0.77                      | -8.28                   | 0.01                       | 0.01                    | 0                   | DN                  | 0                   |
| 303 | 2726   | TARBP1      | 4.12                 | 3.36                     | -0.77                      | -8.10                   | 0.00                       | 0.00                    | 0                   | DN                  | 0                   |
| 304 | 19911  | TOP2B       | 7.75                 | 6.99                     | -0.77                      | -6.42                   | 0.01                       | 0.01                    | 0                   | DN                  | 0                   |
| 305 | 19528  | CBX7        | 1.58                 | 0.81                     | -0.77                      | -5.01                   | 0.00                       | 0.00                    | 0                   | DN                  | 0                   |
| 306 | 9611   | TMOD2       | 2.18                 | 1.41                     | -0.77                      | -5.02                   | 0.00                       | 0.00                    | 0                   | DN                  | 0                   |
| 307 | 2795   | HNRNPU-AS1  | 4.05                 | 3.28                     | -0.77                      | -1.07                   | 0.01                       | 0.00                    | 0                   | DN                  | 0                   |
| 308 | 381    | PINK1       | 3.68                 | 2.92                     | -0.76                      | -4.69                   | 0.00                       | 0.00                    | DN                  | DN                  | DN                  |
| 309 | 2416   | ZBED6       | 2.16                 | 1.40                     | -0.76                      | -3.25                   | 0.01                       | 0.00                    | DN                  | DN                  | 0                   |
| 310 | 17897  | SIRPB1      | 3.75                 | 2.99                     | -0.76                      | -4.95                   | 0.01                       | 0.00                    | 0                   | DN                  | 0                   |
| 311 | 23098  | PHF15       | 4.00                 | 3.24                     | -0.76                      | -6.00                   | 0.01                       | 0.01                    | 0                   | DN                  | 0                   |
| 312 | 20173  | UBA7        | 2.33                 | 1.57                     | -0.76                      | -1.54                   | 0.01                       | 0.01                    | 0                   | DN                  | 0                   |
| 313 | 8290   | KIAA0586    | 3.38                 | 2.62                     | -0.76                      | -8.41                   | 0.01                       | 0.00                    | 0                   | DN                  | 0                   |
| 314 | 29052  | MAF1        | 5.55                 | 4.79                     | -0.76                      | -6.33                   | 0.00                       | 0.00                    | 0                   | DN                  | DN                  |
| 315 | 17706  | ITM2C       | 4.77                 | 4.01                     | -0.76                      | -6.74                   | 0.00                       | 0.01                    | 0                   | DN                  | DN                  |
| 316 | 21789  | PRDM8       | 2.36                 | 1.61                     | -0.76                      | -5.97                   | 0.01                       | 0.01                    | 0                   | DN                  | DN                  |

| #   | GeneID | Gene Symbol | U937.av.log2FPKM.Ctr | U937.av.log2FPKM.BRD0320 | <b>U937.log2FC.BRD0320.vs.Ctr</b> | U937.SNR.BRD0320.vs.Ctr | U937.Pvalue.BRD0320.vs.Ctr | U937.FDR.BRD0320.vs.Ctr | U937.BRD0705.vs.Ctr | <b>U937.BRD0320.vs.Ctr</b> | U937.BRD3731.vs.Ctr |
|-----|--------|-------------|----------------------|--------------------------|-----------------------------------|-------------------------|----------------------------|-------------------------|---------------------|----------------------------|---------------------|
| 317 | 16342  | SPTBN1      | 4.36                 | 3.59                     | -0.76                             | -6.61                   | 0.01                       | 0.01                    | 0                   | DN                         | 0                   |
| 318 | 23866  | BTN3A3      | 1.32                 | 0.56                     | -0.76                             | -4.81                   | 0.01                       | 0.01                    | 0                   | DN                         | 0                   |
| 319 | 1986   | PPOX        | 3.12                 | 2.36                     | -0.76                             | -2.77                   | 0.00                       | 0.00                    | 0                   | DN                         | 0                   |
| 320 | 17265  | CYBRD1      | 3.88                 | 3.13                     | -0.76                             | -5.75                   | 0.01                       | 0.01                    | 0                   | DN                         | 0                   |
| 321 | 27329  | SAMD9       | 2.37                 | 1.61                     | -0.76                             | -8.36                   | 0.00                       | 0.01                    | 0                   | DN                         | 0                   |
| 322 | 17955  | RNF24       | 5.10                 | 4.34                     | -0.76                             | -7.38                   | 0.01                       | 0.01                    | 0                   | DN                         | 0                   |
| 323 | 28385  | RNF122      | 1.83                 | 1.08                     | -0.75                             | -4.72                   | 0.01                       | 0.01                    | DN                  | DN                         | 0                   |
| 324 | 12727  | FBXL20      | 1.40                 | 0.65                     | -0.75                             | -5.99                   | 0.01                       | 0.01                    | DN                  | DN                         | 0                   |
| 325 | 1771   | CREB3L4     | 2.71                 | 1.96                     | -0.75                             | -2.56                   | 0.01                       | 0.00                    | DN                  | DN                         | 0                   |
| 326 | 21988  | BC035733    | 2.33                 | 1.58                     | -0.75                             | -3.42                   | 0.01                       | 0.00                    | 0                   | DN                         | 0                   |
| 327 | 14355  | FCER2       | 5.18                 | 4.43                     | -0.75                             | -3.82                   | 0.01                       | 0.01                    | 0                   | DN                         | DN                  |
| 328 | 26601  | ELFN1       | 2.40                 | 1.66                     | -0.75                             | -11.02                  | 0.01                       | 0.01                    | 0                   | DN                         | DN                  |
| 329 | 7837   | GAS6-AS1    | 2.53                 | 1.78                     | -0.75                             | -1.64                   | 0.00                       | 0.00                    | 0                   | DN                         | 0                   |
| 330 | 5306   | FCHSD2      | 3.70                 | 2.95                     | -0.75                             | -7.57                   | 0.01                       | 0.00                    | 0                   | DN                         | 0                   |
| 331 | 21470  | GPR125      | 3.39                 | 2.65                     | -0.75                             | -20.15                  | 0.01                       | 0.00                    | 0                   | DN                         | 0                   |
| 332 | 2960   | DHTKD1      | 3.22                 | 2.48                     | -0.75                             | -10.21                  | 0.00                       | 0.00                    | 0                   | DN                         | 0                   |
| 333 | 459    | TMEM50A     | 5.65                 | 4.90                     | -0.75                             | -7.74                   | 0.00                       | 0.00                    | 0                   | DN                         | 0                   |
| 334 | 2208   | RALGPS2     | 1.90                 | 1.15                     | -0.75                             | -7.67                   | 0.00                       | 0.01                    | 0                   | DN                         | 0                   |
| 335 | 30088  | SH2D3C      | 1.46                 | 0.72                     | -0.75                             | -3.02                   | 0.01                       | 0.00                    | 0                   | DN                         | 0                   |
| 336 | 2781   | LOC731275   | 2.08                 | 1.33                     | -0.75                             | -1.48                   | 0.00                       | 0.00                    | 0                   | DN                         | 0                   |
| 337 | 692    | MACF1       | 4.37                 | 3.62                     | -0.74                             | -1.59                   | 0.00                       | 0.01                    | DN                  | DN                         | 0                   |
| 338 | 15782  | KIR3DX1     | 1.23                 | 0.48                     | -0.74                             | -2.58                   | 0.00                       | 0.01                    | DN                  | DN                         | 0                   |
| 339 | 633    | BX537811    | 3.96                 | 3.22                     | -0.74                             | -1.17                   | 0.01                       | 0.01                    | DN                  | DN                         | 0                   |
| 340 | 9144   | WHAMMP2     | 2.82                 | 2.08                     | -0.74                             | -1.69                   | 0.00                       | 0.00                    | DN                  | DN                         | 0                   |
| 341 | 17284  | CIR1        | 4.64                 | 3.90                     | -0.74                             | -8.97                   | 0.00                       | 0.00                    | DN                  | DN                         | DN                  |
| 342 | 28063  | PTPRN2      | 4.52                 | 3.78                     | -0.74                             | -9.72                   | 0.01                       | 0.01                    | 0                   | DN                         | 0                   |
| 343 | 22252  | HMGB2       | 8.36                 | 7.62                     | -0.74                             | -9.27                   | 0.01                       | 0.00                    | 0                   | DN                         | 0                   |
| 344 | 12824  | KRT19       | 2.02                 | 1.28                     | -0.74                             | -2.11                   | 0.01                       | 0.00                    | 0                   | DN                         | 0                   |
| 345 | 20828  | CHST2       | 2.91                 | 2.16                     | -0.74                             | -8.77                   | 0.01                       | 0.01                    | 0                   | DN                         | 0                   |
| 346 | 24238  | PRRT1       | 1.52                 | 0.78                     | -0.74                             | -1.79                   | 0.00                       | 0.00                    | 0                   | DN                         | 0                   |
| 347 | 20725  | PIK3R4      | 3.30                 | 2.56                     | -0.74                             | -8.46                   | 0.00                       | 0.01                    | 0                   | DN                         | 0                   |
| 348 | 3101   | KIAA1462    | 0.94                 | 0.19                     | -0.74                             | -3.77                   | 0.01                       | 0.00                    | 0                   | DN                         | 0                   |
| 349 | 21871  | UNC5C       | 1.85                 | 1.11                     | -0.74                             | -3.54                   | 0.00                       | 0.01                    | 0                   | DN                         | 0                   |
| 350 | 3233   | MAPK8       | 3.88                 | 3.14                     | -0.74                             | -4.00                   | 0.01                       | 0.00                    | 0                   | DN                         | 0                   |
| 351 | 31298  | DOCK11      | 4.88                 | 4.14                     | -0.74                             | -10.81                  | 0.00                       | 0.01                    | 0                   | DN                         | 0                   |
| 352 | 21530  | SMIM14      | 1.74                 | 1.00                     | -0.74                             | -3.58                   | 0.01                       | 0.01                    | 0                   | DN                         | 0                   |
| 353 | 22827  | JMY         | 1.13                 | 0.40                     | -0.73                             | -3.68                   | 0.01                       | 0.01                    | DN                  | DN                         | 0                   |

| #   | GeneID | Gene Symbol  | U937.av.log2FPKM.Ctr | U937.av.log2FPKM.BRD0320 | U937.log2FC.BRD0320.vs.Ctr | U937.SNR.BRD0320.vs.Ctr | U937.Pvalue.BRD0320.vs.Ctr | U937.FDR.BRD0320.vs.Ctr | U937.BRD0705.vs.Ctr | U937.BRD0320.vs.Ctr | U937.BRD3731.vs.Ctr |
|-----|--------|--------------|----------------------|--------------------------|----------------------------|-------------------------|----------------------------|-------------------------|---------------------|---------------------|---------------------|
| 354 | 18461  | ATP9A        | 2.66                 | 1.93                     | -0.73                      | -8.82                   | 0.00                       | 0.01                    | DN                  | DN                  | 0                   |
| 355 | 20803  | NMNAT3       | 3.04                 | 2.31                     | -0.73                      | -4.11                   | 0.00                       | 0.01                    | 0                   | DN                  | 0                   |
| 356 | 14548  | NFIX         | 3.90                 | 3.17                     | -0.73                      | -4.89                   | 0.00                       | 0.01                    | 0                   | DN                  | 0                   |
| 357 | 21877  | TSPAN5       | 2.38                 | 1.65                     | -0.73                      | -6.70                   | 0.00                       | 0.00                    | 0                   | DN                  | 0                   |
| 358 | 14667  | AK095221     | 1.80                 | 1.08                     | -0.73                      | -3.48                   | 0.01                       | 0.00                    | 0                   | DN                  | 0                   |
| 359 | 9472   | GATM         | 2.45                 | 1.72                     | -0.73                      | -3.30                   | 0.01                       | 0.00                    | 0                   | DN                  | 0                   |
| 360 | 2966   | LOC283070    | 2.51                 | 1.78                     | -0.73                      | -3.60                   | 0.01                       | 0.00                    | 0                   | DN                  | 0                   |
| 361 | 22450  | ANKRD33B     | 3.08                 | 2.35                     | -0.73                      | -14.11                  | 0.00                       | 0.01                    | 0                   | DN                  | 0                   |
| 362 | 5375   | CLNS1A       | 6.37                 | 5.64                     | -0.73                      | -7.75                   | 0.01                       | 0.01                    | 0                   | DN                  | 0                   |
| 363 | 17541  | LANCL1       | 4.48                 | 3.75                     | -0.73                      | -10.14                  | 0.00                       | 0.01                    | 0                   | DN                  | 0                   |
| 364 | 24239  | PPT2         | 3.95                 | 3.23                     | -0.73                      | -5.97                   | 0.01                       | 0.01                    | 0                   | DN                  | 0                   |
| 365 | 6092   | KLRF2        | 2.25                 | 1.52                     | -0.73                      | -2.27                   | 0.01                       | 0.00                    | 0                   | DN                  | 0                   |
| 366 | 14542  | SYCE2        | 2.11                 | 1.38                     | -0.73                      | -2.81                   | 0.00                       | 0.01                    | 0                   | DN                  | 0                   |
| 367 | 20789  | PIK3CB       | 4.09                 | 3.36                     | -0.73                      | -5.88                   | 0.01                       | 0.01                    | 0                   | DN                  | 0                   |
| 368 | 5622   | USP28        | 3.42                 | 2.69                     | -0.73                      | -2.29                   | 0.01                       | 0.00                    | 0                   | DN                  | 0                   |
| 369 | 16105  | KIF3C        | 1.90                 | 1.17                     | -0.73                      | -4.15                   | 0.01                       | 0.01                    | 0                   | DN                  | 0                   |
| 370 | 13068  | FAM117A      | 3.23                 | 2.51                     | -0.73                      | -5.26                   | 0.00                       | 0.01                    | 0                   | DN                  | 0                   |
| 371 | 20470  | CEP97        | 2.20                 | 1.46                     | -0.73                      | -3.33                   | 0.00                       | 0.01                    | 0                   | DN                  | 0                   |
| 372 | 19133  | P2RX6P       | 0.72                 | 0.00                     | -0.72                      | -3.81                   | 0.00                       | 0.01                    | DN                  | DN                  | 0                   |
| 373 | 383    | KIF17        | 2.30                 | 1.57                     | -0.72                      | -3.32                   | 0.00                       | 0.01                    | DN                  | DN                  | 0                   |
| 374 | 31190  | BEX1         | 8.37                 | 7.65                     | -0.72                      | -7.93                   | 0.01                       | 0.00                    | 0                   | DN                  | DN                  |
| 375 | 24473  | SRPK1        | 7.95                 | 7.23                     | -0.72                      | -14.10                  | 0.01                       | 0.01                    | 0                   | DN                  | 0                   |
| 376 | 23355  | CNOT8        | 5.35                 | 4.64                     | -0.72                      | -4.44                   | 0.01                       | 0.00                    | 0                   | DN                  | 0                   |
| 377 | 326    | BC070363     | 1.52                 | 0.81                     | -0.72                      | -1.86                   | 0.00                       | 0.01                    | 0                   | DN                  | 0                   |
| 378 | 11476  | DOK4         | 1.82                 | 1.10                     | -0.72                      | -2.54                   | 0.01                       | 0.01                    | 0                   | DN                  | 0                   |
| 379 | 13270  | POLG2        | 3.52                 | 2.79                     | -0.72                      | -3.12                   | 0.01                       | 0.01                    | 0                   | DN                  | 0                   |
| 380 | 19307  | NIPSNAP1     | 4.68                 | 3.96                     | -0.72                      | -5.28                   | 0.01                       | 0.00                    | 0                   | DN                  | 0                   |
| 381 | 2124   | SELL         | 1.24                 | 0.52                     | -0.72                      | -3.00                   | 0.01                       | 0.00                    | 0                   | DN                  | 0                   |
| 382 | 4014   | PTPRE        | 3.19                 | 2.46                     | -0.72                      | -2.72                   | 0.01                       | 0.01                    | 0                   | DN                  | DN                  |
| 383 | 1347   | PPM1J        | 0.98                 | 0.26                     | -0.72                      | -2.79                   | 0.00                       | 0.00                    | 0                   | DN                  | 0                   |
| 384 | 11068  | LOC100190986 | 2.74                 | 2.02                     | -0.72                      | -0.80                   | 0.01                       | 0.01                    | 0                   | DN                  | 0                   |
| 385 | 16628  | LOC285074    | 2.66                 | 1.95                     | -0.71                      | -1.55                   | 0.01                       | 0.01                    | DN                  | DN                  | 0                   |
| 386 | 27848  | TCRBV1S1A1N1 | 2.24                 | 1.53                     | -0.71                      | -0.90                   | 0.00                       | 0.01                    | 0                   | DN                  | 0                   |
| 387 | 17994  | LAMP5        | 7.64                 | 6.93                     | -0.71                      | -8.61                   | 0.00                       | 0.01                    | 0                   | DN                  | 0                   |
| 388 | 13230  | MRC2         | 5.49                 | 4.79                     | -0.71                      | -9.75                   | 0.01                       | 0.00                    | 0                   | DN                  | 0                   |
| 389 | 11874  | DQ574721     | 4.59                 | 3.87                     | -0.71                      | -1.33                   | 0.01                       | 0.00                    | 0                   | DN                  | 0                   |
| 390 | 5747   | KIAA1201     | 3.09                 | 2.39                     | -0.71                      | -2.09                   | 0.01                       | 0.00                    | 0                   | DN                  | 0                   |

| #   | GeneID | Gene Symbol | U937.av.log2FPKM.Ctr | U937.av.log2FPKM.BRD0320 | <b>U937.log2FC.BRD0320.vs.Ctr</b> | U937.SNR.BRD0320.vs.Ctr | U937.Pvalue.BRD0320.vs.Ctr | U937.FDR.BRD0320.vs.Ctr | U937.BRD0705.vs.Ctr | <b>U937.BRD0320.vs.Ctr</b> | U937.BRD3731.vs.Ctr |
|-----|--------|-------------|----------------------|--------------------------|-----------------------------------|-------------------------|----------------------------|-------------------------|---------------------|----------------------------|---------------------|
| 391 | 4568   | TSPAN18     | 3.67                 | 2.96                     | -0.71                             | -4.55                   | 0.00                       | 0.00                    | 0                   | DN                         | 0                   |
| 392 | 2710   | DISC1       | 2.47                 | 1.76                     | -0.71                             | -6.40                   | 0.01                       | 0.00                    | 0                   | DN                         | 0                   |
| 393 | 9816   | RPS27L      | 5.75                 | 5.04                     | -0.71                             | -5.35                   | 0.00                       | 0.00                    | 0                   | DN                         | 0                   |
| 394 | 5478   | MRE11A      | 3.45                 | 2.74                     | -0.71                             | -34.99                  | 0.00                       | 0.01                    | 0                   | DN                         | 0                   |
| 395 | 4729   | ATG13       | 3.59                 | 2.88                     | -0.71                             | -4.07                   | 0.01                       | 0.00                    | 0                   | DN                         | 0                   |
| 396 | 22780  | ANKRA2      | 2.01                 | 1.30                     | -0.71                             | -5.10                   | 0.00                       | 0.00                    | 0                   | DN                         | 0                   |
| 397 | 9173   | GOLGA8T     | 3.88                 | 3.18                     | -0.71                             | -1.77                   | 0.01                       | 0.01                    | 0                   | DN                         | 0                   |
| 398 | 17240  | DHRS9       | 2.64                 | 1.94                     | -0.70                             | -4.19                   | 0.00                       | 0.01                    | DN                  | DN                         | 0                   |
| 399 | 9623   | FAM214A     | 1.84                 | 1.14                     | -0.70                             | -2.53                   | 0.01                       | 0.00                    | DN                  | DN                         | 0                   |
| 400 | 6324   | SLC38A2     | 5.14                 | 4.44                     | -0.70                             | -12.54                  | 0.01                       | 0.01                    | DN                  | DN                         | 0                   |
| 401 | 6091   | CLEC2B      | 8.40                 | 7.70                     | -0.70                             | -9.93                   | 0.00                       | 0.00                    | 0                   | DN                         | 0                   |
| 402 | 14859  | AK075337    | 0.70                 | 0.00                     | -0.70                             | -3.55                   | 0.00                       | 0.00                    | 0                   | DN                         | 0                   |
| 403 | 22706  | CENPH       | 5.46                 | 4.77                     | -0.70                             | -5.12                   | 0.00                       | 0.00                    | 0                   | DN                         | 0                   |
| 404 | 10205  | ZSCAN2      | 2.51                 | 1.81                     | -0.70                             | -2.40                   | 0.00                       | 0.01                    | 0                   | DN                         | 0                   |
| 405 | 3365   | EIF4EBP2    | 5.06                 | 4.35                     | -0.70                             | -10.60                  | 0.00                       | 0.00                    | 0                   | DN                         | 0                   |
| 406 | 6896   | APAF1       | 3.37                 | 2.68                     | -0.70                             | -8.33                   | 0.01                       | 0.01                    | 0                   | DN                         | 0                   |
| 407 | 22903  | GLRX        | 4.81                 | 4.11                     | -0.70                             | -5.73                   | 0.00                       | 0.01                    | 0                   | DN                         | 0                   |
| 408 | 3059   | ARHGAP21    | 2.47                 | 1.77                     | -0.70                             | -5.51                   | 0.01                       | 0.00                    | 0                   | DN                         | 0                   |
| 409 | 13160  | SUPT4H1     | 4.95                 | 4.26                     | -0.70                             | -6.96                   | 0.01                       | 0.01                    | 0                   | DN                         | 0                   |
| 410 | 28322  | DPYSL2      | 4.64                 | 3.94                     | -0.70                             | -7.87                   | 0.00                       | 0.01                    | 0                   | DN                         | 0                   |
| 411 | 3148   | ZNF37BP     | 2.30                 | 1.61                     | -0.70                             | -2.03                   | 0.00                       | 0.01                    | 0                   | DN                         | 0                   |
| 412 | 18317  | CHD6        | 2.65                 | 1.94                     | -0.70                             | -3.99                   | 0.00                       | 0.01                    | 0                   | DN                         | 0                   |
| 413 | 17200  | BC073897    | 2.22                 | 1.54                     | -0.69                             | -1.44                   | 0.00                       | 0.00                    | 0                   | DN                         | 0                   |
| 414 | 28985  | PTP4A3      | 3.41                 | 2.72                     | -0.69                             | -5.07                   | 0.01                       | 0.00                    | 0                   | DN                         | 0                   |
| 415 | 19990  | CX3CR1      | 1.04                 | 0.35                     | -0.69                             | -2.47                   | 0.01                       | 0.00                    | 0                   | DN                         | 0                   |
| 416 | 17350  | CERKL       | 3.73                 | 3.04                     | -0.69                             | -6.94                   | 0.00                       | 0.00                    | 0                   | DN                         | 0                   |
| 417 | 14113  | PALM        | 2.07                 | 1.38                     | -0.69                             | -7.06                   | 0.00                       | 0.01                    | 0                   | DN                         | DN                  |
| 418 | 11864  | DBNDD1      | 1.25                 | 0.56                     | -0.69                             | -2.34                   | 0.00                       | 0.01                    | 0                   | DN                         | 0                   |
| 419 | 2932   | PRKCQ-AS1   | 2.56                 | 1.88                     | -0.69                             | -4.22                   | 0.00                       | 0.00                    | 0                   | DN                         | 0                   |
| 420 | 28764  | FBXO43      | 2.79                 | 2.09                     | -0.69                             | -3.18                   | 0.01                       | 0.00                    | 0                   | DN                         | 0                   |
| 421 | 12495  | MYO18A      | 3.83                 | 3.14                     | -0.69                             | -5.61                   | 0.01                       | 0.01                    | 0                   | DN                         | 0                   |
| 422 | 29179  | PSIP1       | 5.78                 | 5.09                     | -0.69                             | -7.84                   | 0.01                       | 0.00                    | 0                   | DN                         | DN                  |
| 423 | 6253   | CCDC91      | 3.41                 | 2.72                     | -0.69                             | -3.01                   | 0.00                       | 0.00                    | 0                   | DN                         | 0                   |
| 424 | 11416  | RBL2        | 4.27                 | 3.58                     | -0.69                             | -5.13                   | 0.00                       | 0.01                    | 0                   | DN                         | 0                   |
| 425 | 21613  | CHIC2       | 3.27                 | 2.57                     | -0.69                             | -7.19                   | 0.00                       | 0.00                    | 0                   | DN                         | DN                  |
| 426 | 5887   | CCDC77      | 3.16                 | 2.47                     | -0.69                             | -4.23                   | 0.01                       | 0.01                    | 0                   | DN                         | 0                   |
| 427 | 23127  | SPOCK1      | 1.84                 | 1.15                     | -0.69                             | -5.79                   | 0.01                       | 0.00                    | 0                   | DN                         | 0                   |

| #   | GeneID | Gene Symbol | U937.av.log2FPKM.Ctr | U937.av.log2FPKM.BRD0320 | <b>U937.log2FC.BRD0320.vs.Ctr</b> | U937.SNR.BRD0320.vs.Ctr | U937.Pvalue.BRD0320.vs.Ctr | U937.FDR.BRD0320.vs.Ctr | U937.BRD0705.vs.Ctr | <b>U937.BRD0320.vs.Ctr</b> | U937.BRD3731.vs.Ctr |
|-----|--------|-------------|----------------------|--------------------------|-----------------------------------|-------------------------|----------------------------|-------------------------|---------------------|----------------------------|---------------------|
| 428 | 20942  | SMC4        | 7.03                 | 6.34                     | -0.69                             | -16.52                  | 0.01                       | 0.01                    | 0                   | DN                         | DN                  |
| 429 | 9311   | GOLGA8B     | 3.76                 | 3.07                     | -0.69                             | -1.37                   | 0.00                       | 0.00                    | 0                   | DN                         | 0                   |
| 430 | 5886   | KDM5A       | 3.27                 | 2.58                     | -0.69                             | -3.30                   | 0.00                       | 0.01                    | 0                   | DN                         | 0                   |
| 431 | 9332   | BC037952    | 3.70                 | 3.03                     | -0.68                             | -1.15                   | 0.00                       | 0.00                    | DN                  | DN                         | 0                   |
| 432 | 28958  | NDRG1       | 5.97                 | 5.29                     | -0.68                             | -9.13                   | 0.01                       | 0.01                    | 0                   | DN                         | DN                  |
| 433 | 14077  | CTDP1       | 4.17                 | 3.48                     | -0.68                             | -5.29                   | 0.01                       | 0.00                    | 0                   | DN                         | 0                   |
| 434 | 14452  | SLC44A2     | 3.30                 | 2.62                     | -0.68                             | -7.48                   | 0.00                       | 0.00                    | 0                   | DN                         | DN                  |
| 435 | 29823  | CORO2A      | 2.49                 | 1.81                     | -0.68                             | -2.77                   | 0.01                       | 0.01                    | 0                   | DN                         | 0                   |
| 436 | 30529  | SHROOM2     | 1.51                 | 0.84                     | -0.68                             | -5.71                   | 0.01                       | 0.00                    | 0                   | DN                         | 0                   |
| 437 | 7075   | MED13L      | 3.70                 | 3.02                     | -0.68                             | -5.41                   | 0.01                       | 0.01                    | 0                   | DN                         | 0                   |
| 438 | 21071  | ABCC5       | 2.79                 | 2.11                     | -0.68                             | -5.14                   | 0.00                       | 0.01                    | 0                   | DN                         | 0                   |
| 439 | 27316  | AKAP9       | 2.86                 | 2.18                     | -0.68                             | -2.37                   | 0.00                       | 0.01                    | 0                   | DN                         | 0                   |
| 440 | 24019  | ZKSCAN8     | 3.32                 | 2.64                     | -0.68                             | -4.22                   | 0.00                       | 0.00                    | 0                   | DN                         | 0                   |
| 441 | 25148  | AK097143    | 2.36                 | 1.68                     | -0.68                             | -0.84                   | 0.01                       | 0.01                    | 0                   | DN                         | 0                   |
| 442 | 20601  | GOLGB1      | 2.90                 | 2.23                     | -0.67                             | -3.27                   | 0.00                       | 0.01                    | DN                  | DN                         | 0                   |
| 443 | 76     | C1orf233    | 2.93                 | 2.26                     | -0.67                             | -4.88                   | 0.01                       | 0.01                    | 0                   | DN                         | 0                   |
| 444 | 26817  | ZNRF2       | 3.62                 | 2.95                     | -0.67                             | -3.87                   | 0.00                       | 0.01                    | 0                   | DN                         | 0                   |
| 445 | 11427  | LPCAT2      | 4.62                 | 3.95                     | -0.67                             | -7.04                   | 0.00                       | 0.01                    | 0                   | DN                         | 0                   |
| 446 | 20714  | PLXND1      | 4.94                 | 4.27                     | -0.67                             | -3.65                   | 0.00                       | 0.01                    | 0                   | DN                         | 0                   |
| 447 | 11903  | SLC43A2     | 1.80                 | 1.13                     | -0.67                             | -3.76                   | 0.00                       | 0.00                    | 0                   | DN                         | 0                   |
| 448 | 912    | TMEM59      | 6.11                 | 5.45                     | -0.67                             | -4.99                   | 0.01                       | 0.01                    | 0                   | DN                         | 0                   |
| 449 | 10203  | UBE2Q2P1    | 1.66                 | 0.99                     | -0.67                             | -1.73                   | 0.01                       | 0.01                    | 0                   | DN                         | 0                   |
| 450 | 18591  | HELZ2       | 1.36                 | 0.69                     | -0.67                             | -6.52                   | 0.01                       | 0.01                    | 0                   | DN                         | 0                   |
| 451 | 7409   | N4BP2L1     | 1.82                 | 1.15                     | -0.67                             | -2.94                   | 0.00                       | 0.00                    | 0                   | DN                         | 0                   |
| 452 | 1474   | PFN1P2      | 1.68                 | 1.02                     | -0.66                             | -0.89                   | 0.00                       | 0.01                    | DN                  | DN                         | 0                   |
| 453 | 10192  | DQ586822    | 1.33                 | 0.68                     | -0.66                             | -1.46                   | 0.00                       | 0.01                    | DN                  | DN                         | 0                   |
| 454 | 6726   | LYZ         | 9.60                 | 8.95                     | -0.66                             | -7.39                   | 0.00                       | 0.01                    | 0                   | DN                         | DN                  |
| 455 | 20603  | EAF2        | 5.31                 | 4.65                     | -0.66                             | -4.96                   | 0.01                       | 0.00                    | 0                   | DN                         | 0                   |
| 456 | 2464   | SLC26A9     | 5.03                 | 4.36                     | -0.66                             | -22.95                  | 0.00                       | 0.00                    | 0                   | DN                         | DN                  |
| 457 | 10109  | IL16        | 3.80                 | 3.14                     | -0.66                             | -4.76                   | 0.00                       | 0.01                    | 0                   | DN                         | 0                   |
| 458 | 12867  | FAM134C     | 2.67                 | 2.01                     | -0.66                             | -5.37                   | 0.00                       | 0.00                    | 0                   | DN                         | 0                   |
| 459 | 10034  | NRG4        | 2.47                 | 1.81                     | -0.66                             | -4.61                   | 0.00                       | 0.01                    | 0                   | DN                         | 0                   |
| 460 | 20704  | H1FX        | 6.51                 | 5.84                     | -0.66                             | -11.18                  | 0.01                       | 0.01                    | 0                   | DN                         | 0                   |
| 461 | 23139  | KIF20A      | 4.89                 | 4.23                     | -0.66                             | -13.72                  | 0.01                       | 0.01                    | 0                   | DN                         | 0                   |
| 462 | 11880  | FAM101B     | 5.85                 | 5.18                     | -0.66                             | -9.81                   | 0.00                       | 0.00                    | 0                   | DN                         | DN                  |
| 463 | 1273   | CELSR2      | 1.46                 | 0.81                     | -0.66                             | -5.60                   | 0.01                       | 0.01                    | 0                   | DN                         | 0                   |
| 464 | 26791  | HIBADH      | 5.06                 | 4.40                     | -0.66                             | -5.03                   | 0.01                       | 0.01                    | 0                   | DN                         | 0                   |

| #   | GeneID | Gene Symbol                | U937.av.log2FPKM.Ctr | U937.av.log2FPKM.BRD0320 | U937.log2FC.BRD0320.vs.Ctr | U937.SNR.BRD0320.vs.Ctr | U937.Pvalue.BRD0320.vs.Ctr | U937.FDR.BRD0320.vs.Ctr | U937.BRD0705.vs.Ctr | U937.BRD0320.vs.Ctr | U937.BRD3731.vs.Ctr |
|-----|--------|----------------------------|----------------------|--------------------------|----------------------------|-------------------------|----------------------------|-------------------------|---------------------|---------------------|---------------------|
| 465 | 645    | AK025726                   | 2.01                 | 1.36                     | -0.66                      | -2.07                   | 0.01                       | 0.01                    | 0                   | DN                  | 0                   |
| 466 | 12873  | EZH1                       | 2.52                 | 1.87                     | -0.66                      | -1.78                   | 0.01                       | 0.01                    | 0                   | DN                  | 0                   |
| 467 | 22555  | RICTOR                     | 2.38                 | 1.72                     | -0.66                      | -4.30                   | 0.00                       | 0.00                    | 0                   | DN                  | 0                   |
| 468 | 6303   | YAF2                       | 2.71                 | 2.05                     | -0.66                      | -4.07                   | 0.00                       | 0.01                    | 0                   | DN                  | 0                   |
| 469 | 8287   | ARID4A                     | 2.64                 | 1.99                     | -0.66                      | -5.33                   | 0.01                       | 0.01                    | 0                   | DN                  | 0                   |
| 470 | 13130  | NOG                        | 1.49                 | 0.83                     | -0.66                      | -1.79                   | 0.00                       | 0.00                    | 0                   | DN                  | 0                   |
| 471 | 17448  | CLK1                       | 4.15                 | 3.50                     | -0.66                      | -2.26                   | 0.00                       | 0.01                    | 0                   | DN                  | 0                   |
| 472 | 4471   | endogenous retrovirus ERV9 | 1.78                 | 1.14                     | -0.65                      | -1.02                   | 0.00                       | 0.00                    | DN                  | DN                  | 0                   |
| 473 | 3348   | SRGN                       | 10.60                | 9.95                     | -0.65                      | -7.14                   | 0.00                       | 0.00                    | 0                   | DN                  | 0                   |
| 474 | 18522  | PHACTR3                    | 4.82                 | 4.18                     | -0.65                      | -7.94                   | 0.01                       | 0.00                    | 0                   | DN                  | 0                   |
| 475 | 20227  | ACY1                       | 4.53                 | 3.88                     | -0.65                      | -3.68                   | 0.01                       | 0.00                    | 0                   | DN                  | 0                   |
| 476 | 10056  | TBC1D2B                    | 4.74                 | 4.09                     | -0.65                      | -15.13                  | 0.00                       | 0.00                    | 0                   | DN                  | 0                   |
| 477 | 4451   | E2F8                       | 4.44                 | 3.79                     | -0.65                      | -9.86                   | 0.01                       | 0.01                    | 0                   | DN                  | DN                  |
| 478 | 18205  | PIGU                       | 5.37                 | 4.73                     | -0.65                      | -5.25                   | 0.01                       | 0.00                    | 0                   | DN                  | 0                   |
| 479 | 20492  | IFT57                      | 5.16                 | 4.52                     | -0.65                      | -16.93                  | 0.00                       | 0.01                    | 0                   | DN                  | DN                  |
| 480 | 31028  | IL2RG                      | 6.93                 | 6.28                     | -0.65                      | -7.44                   | 0.00                       | 0.01                    | 0                   | DN                  | DN                  |
| 481 | 11523  | NAE1                       | 6.25                 | 5.60                     | -0.65                      | -5.05                   | 0.01                       | 0.00                    | 0                   | DN                  | 0                   |
| 482 | 13104  | AK090674                   | 2.17                 | 1.52                     | -0.65                      | -3.88                   | 0.01                       | 0.00                    | 0                   | DN                  | 0                   |
| 483 | 6403   | ASIC1                      | 3.59                 | 2.94                     | -0.65                      | -5.04                   | 0.00                       | 0.01                    | 0                   | DN                  | 0                   |
| 484 | 16277  | ZFP36L2                    | 7.41                 | 6.76                     | -0.65                      | -8.03                   | 0.01                       | 0.00                    | 0                   | DN                  | 0                   |
| 485 | 12761  | TOP2A                      | 6.87                 | 6.22                     | -0.65                      | -6.50                   | 0.01                       | 0.00                    | 0                   | DN                  | 0                   |
| 486 | 6534   | PDE1B                      | 2.16                 | 1.51                     | -0.65                      | -1.71                   | 0.01                       | 0.01                    | 0                   | DN                  | 0                   |
| 487 | 4886   | DTX4                       | 1.18                 | 0.52                     | -0.65                      | -6.91                   | 0.00                       | 0.00                    | 0                   | DN                  | 0                   |
| 488 | 7128   | UNC119B                    | 4.07                 | 3.41                     | -0.65                      | -3.57                   | 0.00                       | 0.00                    | 0                   | DN                  | 0                   |
| 489 | 14436  | ICAM4                      | 3.09                 | 2.45                     | -0.65                      | -4.11                   | 0.00                       | 0.01                    | 0                   | DN                  | 0                   |
| 490 | 5192   | AK057681                   | 1.80                 | 1.14                     | -0.65                      | -1.08                   | 0.00                       | 0.01                    | 0                   | DN                  | 0                   |
| 491 | 21843  | PPM1K                      | 2.11                 | 1.46                     | -0.65                      | -3.20                   | 0.00                       | 0.00                    | 0                   | DN                  | 0                   |
| 492 | 28971  | FAM135B                    | 0.82                 | 0.17                     | -0.65                      | -11.18                  | 0.00                       | 0.01                    | 0                   | DN                  | 0                   |
| 493 | 2335   | NEK7                       | 4.50                 | 3.85                     | -0.65                      | -2.62                   | 0.00                       | 0.01                    | 0                   | DN                  | 0                   |
| 494 | 30862  | PRAF2                      | 4.23                 | 3.57                     | -0.65                      | -7.79                   | 0.00                       | 0.00                    | 0                   | DN                  | 0                   |
| 495 | 12047  | XAF1                       | 1.72                 | 1.07                     | -0.65                      | -1.44                   | 0.01                       | 0.00                    | 0                   | DN                  | 0                   |
| 496 | 12311  | CCDC144B                   | 1.84                 | 1.19                     | -0.65                      | -1.41                   | 0.00                       | 0.01                    | 0                   | DN                  | 0                   |
| 497 | 13294  | HELZ                       | 2.92                 | 2.27                     | -0.65                      | -3.04                   | 0.00                       | 0.00                    | 0                   | DN                  | 0                   |
| 498 | 12356  | LGALS9B                    | 0.82                 | 0.17                     | -0.64                      | -3.78                   | 0.01                       | 0.00                    | DN                  | DN                  | 0                   |
| 499 | 7018   | GPN3                       | 4.65                 | 4.01                     | -0.64                      | -4.25                   | 0.00                       | 0.00                    | 0                   | DN                  | 0                   |
| 500 | 19197  | RGL4                       | 1.68                 | 1.04                     | -0.64                      | -3.66                   | 0.00                       | 0.01                    | 0                   | DN                  | 0                   |
| 501 | 6239   | TM7SF3                     | 4.89                 | 4.26                     | -0.64                      | -5.08                   | 0.00                       | 0.01                    | 0                   | DN                  | 0                   |

| #   | GeneID | Gene Symbol  | U937.av.log2FPKM.Ctr | U937.av.log2FPKM.BRD0320 | U937.log2FC.BRD0320.vs.Ctr | U937.SNR.BRD0320.vs.Ctr | U937.Pvalue.BRD0320.vs.Ctr | U937.FDR.BRD0320.vs.Ctr | U937.BRD0705.vs.Ctr | U937.BRD0320.vs.Ctr | U937.BRD0320.vs.Ctr | U937.BRD0320.vs.Ctr |
|-----|--------|--------------|----------------------|--------------------------|----------------------------|-------------------------|----------------------------|-------------------------|---------------------|---------------------|---------------------|---------------------|
| 502 | 27881  | CASP2        | 4.78                 | 4.14                     | -0.64                      | -4.39                   | 0.01                       | 0.01                    | 0                   | DN                  | 0                   | 0                   |
| 503 | 20604  | SLC15A2      | 1.43                 | 0.79                     | -0.64                      | -1.66                   | 0.00                       | 0.00                    | 0                   | DN                  | 0                   | 0                   |
| 504 | 22077  | MAML3        | 1.67                 | 1.03                     | -0.64                      | -5.27                   | 0.00                       | 0.01                    | 0                   | DN                  | 0                   | 0                   |
| 505 | 26763  | NFE2L3       | 3.47                 | 2.84                     | -0.64                      | -6.19                   | 0.01                       | 0.00                    | 0                   | DN                  | 0                   | 0                   |
| 506 | 16433  | MEIS1        | 4.91                 | 4.28                     | -0.64                      | -6.04                   | 0.01                       | 0.00                    | 0                   | DN                  | 0                   | 0                   |
| 507 | 18790  | GART         | 6.50                 | 5.86                     | -0.64                      | -10.40                  | 0.01                       | 0.01                    | 0                   | DN                  | 0                   | 0                   |
| 508 | 17349  | ITGA4        | 7.04                 | 6.40                     | -0.64                      | -14.93                  | 0.00                       | 0.00                    | 0                   | DN                  | 0                   | 0                   |
| 509 | 3185   |              | 42071                | 2.28                     | 1.64                       | -0.64                   | -4.14                      | 0.00                    | 0.01                | 0                   | DN                  | 0                   |
| 510 | 11582  | DPEP2        | 1.58                 | 0.94                     | -0.64                      | -4.96                   | 0.01                       | 0.01                    | 0                   | DN                  | 0                   | 0                   |
| 511 | 12743  | ORMDL3       | 3.64                 | 3.01                     | -0.64                      | -3.72                   | 0.01                       | 0.01                    | 0                   | DN                  | 0                   | 0                   |
| 512 | 12972  | LRRC37A4P    | 3.20                 | 2.57                     | -0.64                      | -3.31                   | 0.00                       | 0.00                    | 0                   | DN                  | 0                   | 0                   |
| 513 | 8176   | FBXO33       | 2.46                 | 1.82                     | -0.64                      | -7.60                   | 0.00                       | 0.01                    | 0                   | DN                  | 0                   | 0                   |
| 514 | 25012  | BC022047     | 1.41                 | 0.77                     | -0.64                      | -5.05                   | 0.00                       | 0.01                    | 0                   | DN                  | 0                   | 0                   |
| 515 | 2238   | CEP350       | 3.69                 | 3.05                     | -0.64                      | -3.11                   | 0.00                       | 0.01                    | 0                   | DN                  | 0                   | 0                   |
| 516 | 30401  | tRNA Pro     | 9.40                 | 8.76                     | -0.64                      | -3.56                   | 0.00                       | 0.00                    | 0                   | DN                  | 0                   | 0                   |
| 517 | 22878  | CETN3        | 4.26                 | 3.62                     | -0.64                      | -4.17                   | 0.00                       | 0.01                    | 0                   | DN                  | 0                   | 0                   |
| 518 | 23518  | MXD3         | 3.25                 | 2.62                     | -0.63                      | -4.22                   | 0.00                       | 0.01                    | 0                   | DN                  | 0                   | 0                   |
| 519 | 186    | PIK3CD       | 5.42                 | 4.79                     | -0.63                      | -8.65                   | 0.01                       | 0.00                    | 0                   | DN                  | 0                   | 0                   |
| 520 | 23543  | GMCL1P1      | 2.08                 | 1.45                     | -0.63                      | -1.83                   | 0.01                       | 0.01                    | 0                   | DN                  | 0                   | 0                   |
| 521 | 30173  | USP20        | 4.17                 | 3.54                     | -0.63                      | -8.19                   | 0.00                       | 0.00                    | 0                   | DN                  | 0                   | 0                   |
| 522 | 8484   | VASH1        | 3.00                 | 2.37                     | -0.63                      | -10.66                  | 0.01                       | 0.01                    | 0                   | DN                  | 0                   | 0                   |
| 523 | 15784  | LILRB1       | 2.27                 | 1.64                     | -0.63                      | -2.18                   | 0.00                       | 0.00                    | 0                   | DN                  | 0                   | 0                   |
| 524 | 27187  | CLIP2        | 2.63                 | 2.01                     | -0.63                      | -3.47                   | 0.01                       | 0.01                    | 0                   | DN                  | DN                  | 0                   |
| 525 | 24559  | TAF8         | 4.49                 | 3.86                     | -0.63                      | -5.61                   | 0.01                       | 0.00                    | 0                   | DN                  | 0                   | 0                   |
| 526 | 30334  | C9orf139     | 1.39                 | 0.76                     | -0.63                      | -1.96                   | 0.00                       | 0.00                    | 0                   | DN                  | 0                   | 0                   |
| 527 | 4073   | ATHL1        | 3.53                 | 2.90                     | -0.63                      | -2.48                   | 0.00                       | 0.00                    | 0                   | DN                  | 0                   | 0                   |
| 528 | 612    | ZNF362       | 2.82                 | 2.19                     | -0.63                      | -3.52                   | 0.01                       | 0.01                    | 0                   | DN                  | DN                  | 0                   |
| 529 | 5844   | ZBTB44       | 3.80                 | 3.16                     | -0.63                      | -10.68                  | 0.00                       | 0.00                    | 0                   | DN                  | 0                   | 0                   |
| 530 | 17934  | SLC4A11      | 2.65                 | 2.03                     | -0.63                      | -5.51                   | 0.00                       | 0.01                    | 0                   | DN                  | DN                  | 0                   |
| 531 | 17530  | PIKFYVE      | 3.66                 | 3.03                     | -0.63                      | -5.45                   | 0.01                       | 0.01                    | 0                   | DN                  | 0                   | 0                   |
| 532 | 22556  | FYB          | 3.83                 | 3.19                     | -0.63                      | -5.13                   | 0.01                       | 0.00                    | 0                   | DN                  | 0                   | 0                   |
| 533 | 24261  | LOC100507463 | 3.79                 | 3.17                     | -0.63                      | -3.86                   | 0.01                       | 0.00                    | 0                   | DN                  | 0                   | 0                   |
| 534 | 10263  | AP3S2        | 2.88                 | 2.25                     | -0.63                      | -5.70                   | 0.00                       | 0.01                    | 0                   | DN                  | 0                   | 0                   |
| 535 | 20287  | FAM208A      | 4.79                 | 4.16                     | -0.63                      | -7.41                   | 0.01                       | 0.00                    | 0                   | DN                  | 0                   | 0                   |
| 536 | 12899  | NBR1         | 3.22                 | 2.60                     | -0.63                      | -10.62                  | 0.00                       | 0.00                    | 0                   | DN                  | 0                   | 0                   |
| 537 | 23469  | CREBRF       | 1.04                 | 0.40                     | -0.63                      | -5.87                   | 0.01                       | 0.00                    | 0                   | DN                  | 0                   | 0                   |
| 538 | 26587  | GPR146       | 1.42                 | 0.81                     | -0.62                      | -3.06                   | 0.00                       | 0.01                    | DN                  | DN                  | 0                   | 0                   |



| #   | GeneID | Gene Symbol | U937.av.log2FPKM.Ctr | U937.av.log2FPKM.BRD0320 | U937.log2FC.BRD0320.vs.Ctr | U937.SNR.BRD0320.vs.Ctr | U937.Pvalue.BRD0320.vs.Ctr | U937.FDR.BRD0320.vs.Ctr | U937.BRD0705.vs.Ctr | U937.BRD0320.vs.Ctr | U937.BRD3731.vs.Ctr |
|-----|--------|-------------|----------------------|--------------------------|----------------------------|-------------------------|----------------------------|-------------------------|---------------------|---------------------|---------------------|
| 539 | 14121  | ELANE       | 9.87                 | 9.25                     | -0.62                      | -14.64                  | 0.00                       | 0.01                    | 0                   | DN                  | 0                   |
| 540 | 7245   | MMP17       | 2.11                 | 1.49                     | -0.62                      | -3.54                   | 0.01                       | 0.00                    | 0                   | DN                  | 0                   |
| 541 | 15445  | DBP         | 3.71                 | 3.09                     | -0.62                      | -5.09                   | 0.00                       | 0.01                    | 0                   | DN                  | 0                   |
| 542 | 9406   | CAPN3       | 1.28                 | 0.66                     | -0.62                      | -1.24                   | 0.01                       | 0.01                    | 0                   | DN                  | 0                   |
| 543 | 785    | ERI3        | 5.70                 | 5.08                     | -0.62                      | -4.30                   | 0.00                       | 0.01                    | 0                   | DN                  | 0                   |
| 544 | 1501   | GNRHR2      | 2.17                 | 1.54                     | -0.62                      | -1.64                   | 0.01                       | 0.00                    | 0                   | DN                  | 0                   |
| 545 | 16766  | IL18R1      | 2.39                 | 1.77                     | -0.62                      | -5.70                   | 0.00                       | 0.01                    | 0                   | DN                  | 0                   |
| 546 | 27261  | RSBN1L      | 3.76                 | 3.14                     | -0.62                      | -5.44                   | 0.01                       | 0.01                    | 0                   | DN                  | 0                   |
| 547 | 29506  | BC080605    | 2.33                 | 1.71                     | -0.62                      | -1.72                   | 0.01                       | 0.00                    | 0                   | DN                  | 0                   |
| 548 | 24581  | KLHDC3      | 6.90                 | 6.28                     | -0.62                      | -13.03                  | 0.01                       | 0.00                    | 0                   | DN                  | 0                   |
| 549 | 527    | EYA3        | 3.96                 | 3.34                     | -0.62                      | -4.88                   | 0.00                       | 0.00                    | 0                   | DN                  | 0                   |
| 550 | 2162   | TNFSF4      | 1.02                 | 0.40                     | -0.62                      | -3.68                   | 0.00                       | 0.00                    | 0                   | DN                  | 0                   |
| 551 | 12427  | KSR1        | 1.98                 | 1.36                     | -0.62                      | -2.62                   | 0.00                       | 0.00                    | 0                   | DN                  | 0                   |
| 552 | 22259  | CEP44       | 2.72                 | 2.10                     | -0.62                      | -11.62                  | 0.01                       | 0.00                    | 0                   | DN                  | 0                   |
| 553 | 12272  | GID4        | 2.59                 | 1.97                     | -0.62                      | -8.65                   | 0.00                       | 0.01                    | 0                   | DN                  | 0                   |
| 554 | 17471  | SUMO1       | 6.07                 | 5.45                     | -0.62                      | -5.21                   | 0.01                       | 0.01                    | 0                   | DN                  | 0                   |
| 555 | 9913   | UACA        | 2.95                 | 2.32                     | -0.62                      | -4.77                   | 0.00                       | 0.01                    | 0                   | DN                  | DN                  |
| 556 | 29533  | CBWD3       | 4.01                 | 3.39                     | -0.62                      | -1.50                   | 0.00                       | 0.00                    | 0                   | DN                  | 0                   |
| 557 | 29667  | ISCA1       | 3.80                 | 3.18                     | -0.62                      | -1.90                   | 0.01                       | 0.00                    | 0                   | DN                  | 0                   |
| 558 | 9362   | CASC5       | 4.13                 | 3.51                     | -0.62                      | -2.42                   | 0.01                       | 0.01                    | 0                   | DN                  | 0                   |
| 559 | 29869  | LOC286367   | 1.23                 | 0.61                     | -0.62                      | -2.09                   | 0.01                       | 0.01                    | 0                   | DN                  | 0                   |
| 560 | 16691  | ANKRD36C    | 1.80                 | 1.18                     | -0.62                      | -1.14                   | 0.00                       | 0.00                    | 0                   | DN                  | 0                   |
| 561 | 24689  | ICK         | 2.35                 | 1.73                     | -0.62                      | -4.89                   | 0.01                       | 0.00                    | 0                   | DN                  | 0                   |
| 562 | 455    | SYF2        | 5.11                 | 4.49                     | -0.62                      | -5.05                   | 0.00                       | 0.00                    | 0                   | DN                  | 0                   |
| 563 | 19069  | SEPT5-GP1BB | 0.93                 | 0.31                     | -0.62                      | -3.39                   | 0.01                       | 0.01                    | 0                   | DN                  | 0                   |
| 564 | 21804  | AK128593    | 2.31                 | 1.69                     | -0.62                      | -1.34                   | 0.01                       | 0.00                    | 0                   | DN                  | 0                   |
| 565 | 7729   | MBNL2       | 2.94                 | 2.32                     | -0.62                      | -5.73                   | 0.01                       | 0.01                    | 0                   | DN                  | 0                   |
| 566 | 10729  | CCDC154     | 2.18                 | 1.57                     | -0.61                      | -2.05                   | 0.01                       | 0.00                    | DN                  | DN                  | 0                   |
| 567 | 20456  | TMEM45A     | 3.46                 | 2.84                     | -0.61                      | -1.13                   | 0.01                       | 0.01                    | DN                  | DN                  | 0                   |
| 568 | 21808  | PLAC8       | 3.24                 | 2.63                     | -0.61                      | -5.92                   | 0.01                       | 0.01                    | 0                   | DN                  | 0                   |
| 569 | 23067  | IRF1        | 2.74                 | 2.12                     | -0.61                      | -1.75                   | 0.01                       | 0.00                    | 0                   | DN                  | DN                  |
| 570 | 16883  | IL1RN       | 2.74                 | 2.13                     | -0.61                      | -2.73                   | 0.00                       | 0.01                    | 0                   | DN                  | DN                  |
| 571 | 19192  | IGLL1       | 1.18                 | 0.57                     | -0.61                      | -1.52                   | 0.00                       | 0.00                    | 0                   | DN                  | 0                   |
| 572 | 19059  | CLTCL1      | 3.98                 | 3.37                     | -0.61                      | -2.88                   | 0.01                       | 0.01                    | 0                   | DN                  | 0                   |
| 573 | 4160   | ASCL2       | 1.13                 | 0.52                     | -0.61                      | -6.95                   | 0.00                       | 0.00                    | 0                   | DN                  | 0                   |
| 574 | 2200   | SEC16B      | 1.52                 | 0.92                     | -0.61                      | -2.98                   | 0.00                       | 0.00                    | 0                   | DN                  | 0                   |
| 575 | 9405   | GANC        | 3.97                 | 3.36                     | -0.61                      | -9.00                   | 0.00                       | 0.01                    | 0                   | DN                  | 0                   |

| #   | GeneID | Gene Symbol  | U937.av.log2FPKM.Ctr | U937.av.log2FPKM.BRD0320 | U937.log2FC.BRD0320.vs.Ctr | U937.SNR.BRD0320.vs.Ctr | U937.Pvalue.BRD0320.vs.Ctr | U937.FDR.BRD0320.vs.Ctr | U937.BRD0705.vs.Ctr | U937.BRD0320.vs.Ctr | U937.BRD3731.vs.Ctr |
|-----|--------|--------------|----------------------|--------------------------|----------------------------|-------------------------|----------------------------|-------------------------|---------------------|---------------------|---------------------|
| 576 | 29950  | ALAD         | 3.40                 | 2.79                     | -0.61                      | -4.24                   | 0.01                       | 0.01                    | 0                   | DN                  | 0                   |
| 577 | 1672   | RFX5         | 4.44                 | 3.83                     | -0.61                      | -11.15                  | 0.01                       | 0.00                    | 0                   | DN                  | 0                   |
| 578 | 8988   | GOLGA8I      | 2.41                 | 1.81                     | -0.61                      | -1.08                   | 0.01                       | 0.01                    | 0                   | DN                  | 0                   |
| 579 | 8705   | BC014138     | 4.51                 | 3.90                     | -0.61                      | -6.91                   | 0.00                       | 0.01                    | 0                   | DN                  | 0                   |
| 580 | 20034  | SNRK         | 4.38                 | 3.76                     | -0.61                      | -9.11                   | 0.00                       | 0.01                    | 0                   | DN                  | 0                   |
| 581 | 7566   | FAM124A      | 2.38                 | 1.77                     | -0.61                      | -5.91                   | 0.00                       | 0.01                    | 0                   | DN                  | 0                   |
| 582 | 18866  | MX2          | 5.89                 | 5.28                     | -0.61                      | -5.57                   | 0.01                       | 0.01                    | 0                   | DN                  | 0                   |
| 583 | 881    | ZFYVE9       | 2.20                 | 1.59                     | -0.61                      | -3.96                   | 0.01                       | 0.01                    | 0                   | DN                  | 0                   |
| 584 | 17493  | BC047484     | 2.47                 | 1.86                     | -0.61                      | -3.00                   | 0.01                       | 0.01                    | 0                   | DN                  | 0                   |
| 585 | 20262  | ITIH4        | 1.32                 | 0.71                     | -0.61                      | -2.04                   | 0.01                       | 0.01                    | 0                   | DN                  | 0                   |
| 586 | 24852  | CASP8AP2     | 3.29                 | 2.68                     | -0.61                      | -3.01                   | 0.01                       | 0.01                    | 0                   | DN                  | 0                   |
| 587 | 29259  | IFT74        | 3.28                 | 2.67                     | -0.61                      | -2.34                   | 0.00                       | 0.00                    | 0                   | DN                  | 0                   |
| 588 | 14018  | KDSR         | 4.04                 | 3.43                     | -0.61                      | -6.37                   | 0.00                       | 0.00                    | 0                   | DN                  | 0                   |
| 589 | 17664  | WDFY1        | 5.52                 | 4.91                     | -0.61                      | -7.33                   | 0.01                       | 0.00                    | 0                   | DN                  | 0                   |
| 590 | 11900  | INPP5K       | 2.54                 | 1.92                     | -0.61                      | -3.41                   | 0.01                       | 0.00                    | 0                   | DN                  | 0                   |
| 591 | 19764  | SRGAP3       | 0.98                 | 0.38                     | -0.61                      | -4.00                   | 0.00                       | 0.01                    | 0                   | DN                  | 0                   |
| 592 | 21003  | TMEM212      | 2.64                 | 2.03                     | -0.61                      | -1.18                   | 0.01                       | 0.01                    | 0                   | DN                  | 0                   |
| 593 | 12108  | TP53         | 2.50                 | 1.89                     | -0.61                      | -0.99                   | 0.00                       | 0.01                    | 0                   | DN                  | 0                   |
| 594 | 25171  | UTRN         | 2.91                 | 2.31                     | -0.61                      | -2.17                   | 0.00                       | 0.00                    | 0                   | DN                  | 0                   |
| 595 | 20402  | BC050344     | 2.85                 | 2.24                     | -0.61                      | -0.94                   | 0.00                       | 0.01                    | 0                   | DN                  | 0                   |
| 596 | 6751   | TBC1D15      | 4.39                 | 3.79                     | -0.60                      | -5.20                   | 0.01                       | 0.01                    | DN                  | DN                  | 0                   |
| 597 | 25138  | HECA         | 3.40                 | 2.80                     | -0.60                      | -6.38                   | 0.00                       | 0.01                    | DN                  | DN                  | 0                   |
| 598 | 5562   | ATM          | 3.22                 | 2.62                     | -0.60                      | -2.42                   | 0.01                       | 0.00                    | DN                  | DN                  | 0                   |
| 599 | 5025   | LGALS12      | 5.44                 | 4.84                     | -0.60                      | -8.74                   | 0.00                       | 0.01                    | 0                   | DN                  | 0                   |
| 600 | 2817   | NLRP3        | 3.43                 | 2.84                     | -0.60                      | -6.97                   | 0.01                       | 0.00                    | 0                   | DN                  | 0                   |
| 601 | 27998  | ABP1         | 2.96                 | 2.37                     | -0.60                      | -3.25                   | 0.00                       | 0.01                    | 0                   | DN                  | 0                   |
| 602 | 20190  | HYAL3        | 4.30                 | 3.70                     | -0.60                      | -3.96                   | 0.01                       | 0.01                    | 0                   | DN                  | 0                   |
| 603 | 5237   | CPT1A        | 4.59                 | 3.99                     | -0.60                      | -5.88                   | 0.00                       | 0.00                    | 0                   | DN                  | 0                   |
| 604 | 18405  | SLC35C2      | 4.85                 | 4.25                     | -0.60                      | -5.46                   | 0.00                       | 0.01                    | 0                   | DN                  | 0                   |
| 605 | 24504  | CCDC167      | 5.04                 | 4.44                     | -0.60                      | -4.78                   | 0.00                       | 0.00                    | 0                   | DN                  | 0                   |
| 606 | 13389  | MIF4GD       | 3.18                 | 2.58                     | -0.60                      | -2.95                   | 0.01                       | 0.00                    | 0                   | DN                  | 0                   |
| 607 | 17985  | FERMT1       | 4.17                 | 3.56                     | -0.60                      | -5.73                   | 0.00                       | 0.00                    | 0                   | DN                  | 0                   |
| 608 | 13970  | TCF4         | 2.41                 | 1.82                     | -0.60                      | -1.92                   | 0.01                       | 0.00                    | 0                   | DN                  | 0                   |
| 609 | 28314  | DKFZp451J181 | 2.67                 | 2.07                     | -0.60                      | -3.26                   | 0.00                       | 0.01                    | 0                   | DN                  | 0                   |
| 610 | 4519   | LMO2         | 5.61                 | 5.01                     | -0.60                      | -8.22                   | 0.00                       | 0.00                    | 0                   | DN                  | 0                   |
| 611 | 21439  | AX746699     | 1.18                 | 0.58                     | -0.60                      | -1.70                   | 0.01                       | 0.00                    | 0                   | DN                  | 0                   |
| 612 | 10937  | ATF7IP2      | 1.55                 | 0.94                     | -0.60                      | -2.03                   | 0.01                       | 0.00                    | 0                   | DN                  | 0                   |

| #   | GeneID | Gene Symbol | U937.av.log2FPKM.Ctr | U937.av.log2FPKM.BRD0320 | <b>U937.log2FC.BRD0320.vs.Ctr</b> | U937.SNR.BRD0320.vs.Ctr | U937.Pvalue.BRD0320.vs.Ctr | U937.FDR.BRD0320.vs.Ctr | U937.BRD0705.vs.Ctr | <b>U937.BRD0320.vs.Ctr</b> | U937.BRD3731.vs.Ctr |
|-----|--------|-------------|----------------------|--------------------------|-----------------------------------|-------------------------|----------------------------|-------------------------|---------------------|----------------------------|---------------------|
| 613 | 11916  | DPH1        | 4.00                 | 3.40                     | -0.60                             | -2.26                   | 0.00                       | 0.01                    | 0                   | DN                         | 0                   |
| 614 | 6269   | FAM60A      | 5.10                 | 4.50                     | -0.60                             | -6.49                   | 0.01                       | 0.01                    | 0                   | DN                         | 0                   |
| 615 | 8406   | PCNX        | 3.69                 | 3.09                     | -0.60                             | -5.64                   | 0.00                       | 0.00                    | 0                   | DN                         | 0                   |
| 616 | 18979  | BC031638    | 2.57                 | 1.97                     | -0.60                             | -2.16                   | 0.01                       | 0.01                    | 0                   | DN                         | 0                   |
| 617 | 7052   | OAS2        | 1.14                 | 0.55                     | -0.60                             | -4.78                   | 0.00                       | 0.01                    | 0                   | DN                         | 0                   |
| 618 | 19799  | GHRL        | 0.88                 | 0.29                     | -0.60                             | -1.80                   | 0.00                       | 0.00                    | 0                   | DN                         | 0                   |
| 619 | 5975   | VAMP1       | 2.34                 | 1.74                     | -0.60                             | -1.56                   | 0.01                       | 0.00                    | 0                   | DN                         | 0                   |
| 620 | 29855  | GRIN3A      | 1.29                 | 0.69                     | -0.60                             | -2.24                   | 0.00                       | 0.00                    | 0                   | DN                         | 0                   |
| 621 | 6869   | ELK3        | 4.25                 | 3.65                     | -0.60                             | -3.54                   | 0.01                       | 0.00                    | 0                   | DN                         | 0                   |
| 622 | 7698   | MIR17HG     | 3.05                 | 2.44                     | -0.60                             | -1.38                   | 0.01                       | 0.01                    | 0                   | DN                         | 0                   |
| 623 | 20286  | CCDC66      | 3.82                 | 3.22                     | -0.60                             | -9.49                   | 0.01                       | 0.01                    | 0                   | DN                         | 0                   |
| 624 | 1646   | PRUNE       | 3.37                 | 2.77                     | -0.60                             | -4.25                   | 0.01                       | 0.00                    | 0                   | DN                         | 0                   |
| 625 | 2095   | POU2F1      | 2.71                 | 2.11                     | -0.60                             | -2.67                   | 0.01                       | 0.00                    | 0                   | DN                         | 0                   |
| 626 | 13771  | RNMT        | 4.29                 | 3.69                     | -0.60                             | -2.75                   | 0.00                       | 0.00                    | 0                   | DN                         | 0                   |
| 627 | 21580  | FRYL        | 2.99                 | 2.39                     | -0.60                             | -3.54                   | 0.00                       | 0.00                    | 0                   | DN                         | 0                   |
| 628 | 20617  | PARP14      | 2.34                 | 1.74                     | -0.60                             | -6.10                   | 0.01                       | 0.00                    | 0                   | DN                         | 0                   |
| 629 | 9640   | RFX7        | 3.93                 | 3.34                     | -0.60                             | -4.41                   | 0.00                       | 0.01                    | 0                   | DN                         | 0                   |
| 630 | 9647   | CGNL1       | 1.57                 | 0.97                     | -0.60                             | -5.18                   | 0.01                       | 0.01                    | 0                   | DN                         | 0                   |
| 631 | 21213  | UBXN7       | 2.46                 | 1.85                     | -0.60                             | -9.83                   | 0.01                       | 0.00                    | 0                   | DN                         | 0                   |
| 632 | 310    | CROCCP2     | 4.69                 | 4.10                     | -0.60                             | -1.51                   | 0.00                       | 0.01                    | 0                   | DN                         | 0                   |
| 633 | 594    | BSDC1       | 3.80                 | 3.20                     | -0.60                             | -4.16                   | 0.00                       | 0.01                    | 0                   | DN                         | 0                   |
| 634 | 6352   | SNORA34     | 0.75                 | 0.17                     | -0.59                             | -1.19                   | 0.01                       | 0.00                    | DN                  | DN                         | 0                   |
| 635 | 13877  | KIAA1328    | 3.25                 | 2.67                     | -0.59                             | -1.41                   | 0.00                       | 0.00                    | DN                  | DN                         | 0                   |
| 636 | 11972  | SPNS2       | 1.44                 | 0.86                     | -0.59                             | -2.40                   | 0.01                       | 0.00                    | 0                   | DN                         | 0                   |
| 637 | 19167  | PPM1F       | 3.84                 | 3.25                     | -0.59                             | -3.84                   | 0.01                       | 0.00                    | 0                   | DN                         | 0                   |
| 638 | 608    | AK2         | 8.17                 | 7.58                     | -0.59                             | -8.54                   | 0.00                       | 0.01                    | 0                   | DN                         | 0                   |
| 639 | 19294  | EMID1       | 1.45                 | 0.85                     | -0.59                             | -1.66                   | 0.00                       | 0.00                    | 0                   | DN                         | 0                   |
| 640 | 20891  | MBNL1       | 6.90                 | 6.31                     | -0.59                             | -25.56                  | 0.01                       | 0.01                    | 0                   | DN                         | 0                   |
| 641 | 26878  | AOAH        | 2.83                 | 2.25                     | -0.59                             | -3.27                   | 0.00                       | 0.01                    | 0                   | DN                         | 0                   |
| 642 | 10835  | MMP25       | 2.98                 | 2.39                     | -0.59                             | -3.27                   | 0.00                       | 0.01                    | 0                   | DN                         | DN                  |
| 643 | 23367  | CYFIP2      | 2.53                 | 1.94                     | -0.59                             | -7.65                   | 0.00                       | 0.01                    | 0                   | DN                         | 0                   |
| 644 | 13688  | RALBP1      | 4.97                 | 4.38                     | -0.59                             | -10.60                  | 0.01                       | 0.00                    | 0                   | DN                         | 0                   |
| 645 | 30032  | MIR600HG    | 1.27                 | 0.68                     | -0.59                             | -2.41                   | 0.00                       | 0.00                    | 0                   | DN                         | 0                   |
| 646 | 1406   | FAM46C      | 3.34                 | 2.75                     | -0.59                             | -4.44                   | 0.00                       | 0.00                    | 0                   | DN                         | DN                  |
| 647 | 1366   | HIPK1       | 4.51                 | 3.91                     | -0.59                             | -5.89                   | 0.01                       | 0.00                    | 0                   | DN                         | 0                   |
| 648 | 6306   | AK096233    | 1.50                 | 0.91                     | -0.59                             | -1.98                   | 0.00                       | 0.00                    | 0                   | DN                         | 0                   |
| 649 | 29395  | ZCCHC7      | 3.88                 | 3.29                     | -0.59                             | -17.69                  | 0.01                       | 0.00                    | 0                   | DN                         | 0                   |

| #   | GeneID | Gene Symbol | U937.av.log2FPKM.Ctr | U937.av.log2FPKM.BRD0320 | <b>U937.log2FC.BRD0320.vs.Ctr</b> | U937.SNR.BRD0320.vs.Ctr | U937.Pvalue.BRD0320.vs.Ctr | U937.FDR.BRD0320.vs.Ctr | U937.BRD0705.vs.Ctr | <b>U937.BRD0320.vs.Ctr</b> | U937.BRD3731.vs.Ctr |
|-----|--------|-------------|----------------------|--------------------------|-----------------------------------|-------------------------|----------------------------|-------------------------|---------------------|----------------------------|---------------------|
| 650 | 9112   | HERC2       | 4.05                 | 3.46                     | -0.59                             | -1.34                   | 0.00                       | 0.00                    | 0                   | DN                         | 0                   |
| 651 | 15438  | CYTH2       | 3.16                 | 2.58                     | -0.59                             | -2.46                   | 0.01                       | 0.00                    | 0                   | DN                         | 0                   |
| 652 | 3139   | ZNF37A      | 3.42                 | 2.83                     | -0.59                             | -2.76                   | 0.00                       | 0.01                    | 0                   | DN                         | 0                   |
| 653 | 21513  | FLJ13197    | 1.78                 | 1.19                     | -0.59                             | -1.11                   | 0.01                       | 0.00                    | 0                   | DN                         | 0                   |
| 654 | 2934   | SFMBT2      | 3.43                 | 2.84                     | -0.59                             | -3.27                   | 0.01                       | 0.00                    | 0                   | DN                         | DN                  |
| 655 | 29594  | VPS13A      | 2.90                 | 2.31                     | -0.59                             | -2.21                   | 0.00                       | 0.01                    | 0                   | DN                         | 0                   |
| 656 | 24247  | AK123889    | 2.47                 | 1.89                     | -0.59                             | -1.89                   | 0.00                       | 0.00                    | 0                   | DN                         | 0                   |
| 657 | 21432  | MGC4836     | 3.63                 | 3.05                     | -0.58                             | -1.05                   | 0.01                       | 0.00                    | DN                  | DN                         | 0                   |
| 658 | 31231  | MORC4       | 4.69                 | 4.11                     | -0.58                             | -1.28                   | 0.00                       | 0.00                    | DN                  | DN                         | 0                   |
| 659 | 4916   | MS4A3       | 5.17                 | 4.59                     | -0.58                             | -4.70                   | 0.00                       | 0.00                    | 0                   | DN                         | UP                  |
| 660 | 30131  | CERCAM      | 4.39                 | 3.81                     | -0.58                             | -6.15                   | 0.00                       | 0.00                    | 0                   | DN                         | 0                   |
| 661 | 4162   | TSPAN32     | 3.09                 | 2.51                     | -0.58                             | -2.03                   | 0.01                       | 0.01                    | 0                   | DN                         | 0                   |
| 662 | 18616  | TCEA2       | 3.48                 | 2.90                     | -0.58                             | -1.35                   | 0.01                       | 0.00                    | 0                   | DN                         | 0                   |
| 663 | 26987  | IKZF1       | 5.44                 | 4.86                     | -0.58                             | -13.33                  | 0.00                       | 0.00                    | 0                   | DN                         | 0                   |
| 664 | 30750  | RPGR        | 3.61                 | 3.03                     | -0.58                             | -5.15                   | 0.01                       | 0.00                    | 0                   | DN                         | 0                   |
| 665 | 8695   | CCDC85C     | 2.45                 | 1.86                     | -0.58                             | -10.31                  | 0.00                       | 0.00                    | 0                   | DN                         | 0                   |
| 666 | 10908  | ROGDI       | 4.01                 | 3.44                     | -0.58                             | -3.64                   | 0.00                       | 0.01                    | 0                   | DN                         | DN                  |
| 667 | 31526  | AFF2        | 4.28                 | 3.70                     | -0.58                             | -2.34                   | 0.01                       | 0.00                    | 0                   | DN                         | 0                   |
| 668 | 19187  | BCR         | 4.07                 | 3.48                     | -0.58                             | -2.46                   | 0.00                       | 0.01                    | 0                   | DN                         | 0                   |
| 669 | 29209  | PTPLAD2     | 3.22                 | 2.64                     | -0.58                             | -1.98                   | 0.00                       | 0.01                    | 0                   | DN                         | 0                   |
| 670 | 6705   | HELB        | 1.26                 | 0.68                     | -0.58                             | -2.49                   | 0.00                       | 0.00                    | 0                   | DN                         | 0                   |
| 671 | 17917  | EBF4        | 1.68                 | 1.10                     | -0.58                             | -2.66                   | 0.01                       | 0.01                    | 0                   | DN                         | 0                   |
| 672 | 23281  | ADRB2       | 3.18                 | 2.60                     | -0.58                             | -1.97                   | 0.01                       | 0.01                    | 0                   | DN                         | 0                   |
| 673 | 24462  | FANCE       | 5.58                 | 5.00                     | -0.58                             | -8.92                   | 0.01                       | 0.01                    | 0                   | DN                         | 0                   |
| 674 | 24475  | MAPK14      | 6.51                 | 5.94                     | -0.58                             | -6.41                   | 0.00                       | 0.00                    | 0                   | DN                         | 0                   |
| 675 | 16876  | IL1B        | 1.36                 | 0.78                     | -0.58                             | -6.22                   | 0.00                       | 0.01                    | 0                   | DN                         | 0                   |
| 676 | 5518   | TMEM123     | 6.54                 | 5.96                     | -0.58                             | -3.71                   | 0.00                       | 0.00                    | 0                   | DN                         | 0                   |
| 677 | 9200   | LOC643699   | 4.22                 | 3.64                     | -0.58                             | -1.49                   | 0.01                       | 0.01                    | 0                   | DN                         | 0                   |
| 678 | 16718  | ANKRD36     | 3.26                 | 2.68                     | -0.58                             | -1.07                   | 0.01                       | 0.00                    | 0                   | DN                         | 0                   |
| 679 | 6240   | MED21       | 3.83                 | 3.25                     | -0.58                             | -6.78                   | 0.00                       | 0.00                    | 0                   | DN                         | 0                   |
| 680 | 10294  | SV2B        | 1.16                 | 0.58                     | -0.58                             | -2.98                   | 0.01                       | 0.00                    | 0                   | DN                         | 0                   |
| 681 | 6533   | NCKAP1L     | 6.13                 | 5.55                     | -0.58                             | -15.94                  | 0.01                       | 0.01                    | 0                   | DN                         | 0                   |
| 682 | 31082  | AX748371    | 1.14                 | 0.56                     | -0.58                             | -1.48                   | 0.00                       | 0.01                    | 0                   | DN                         | 0                   |
| 683 | 24553  | DQ592954    | 3.10                 | 2.51                     | -0.58                             | -4.06                   | 0.01                       | 0.01                    | 0                   | DN                         | 0                   |
| 684 | 27340  | BET1        | 3.43                 | 2.84                     | -0.58                             | -2.72                   | 0.00                       | 0.00                    | 0                   | DN                         | 0                   |
| 685 | 503    | TRNP1       | 0.85                 | 0.27                     | -0.58                             | -5.26                   | 0.01                       | 0.00                    | 0                   | DN                         | 0                   |
| 686 | 24570  | GLTSCR1L    | 2.97                 | 2.38                     | -0.58                             | -4.37                   | 0.01                       | 0.00                    | 0                   | DN                         | 0                   |

| #   | GeneID | Gene Symbol | U937.av.log2FPKM.Ctr | U937.av.log2FPKM.BRD0320 | <b>U937.log2FC.BRD0320.vs.Ctr</b> | U937.SNR.BRD0320.vs.Ctr | U937.Pvalue.BRD0320.vs.Ctr | U937.FDR.BRD0320.vs.Ctr | U937.BRD0705.vs.Ctr | <b>U937.BRD0320.vs.Ctr</b> | U937.BRD3731.vs.Ctr |
|-----|--------|-------------|----------------------|--------------------------|-----------------------------------|-------------------------|----------------------------|-------------------------|---------------------|----------------------------|---------------------|
| 687 | 11200  | SNX29P2     | 3.19                 | 2.62                     | -0.57                             | -0.83                   | 0.00                       | 0.00                    | DN                  | DN                         | 0                   |
| 688 | 20021  | NKTR        | 4.11                 | 3.54                     | -0.57                             | -1.16                   | 0.01                       | 0.01                    | DN                  | DN                         | 0                   |
| 689 | 20818  | XRN1        | 2.57                 | 1.99                     | -0.57                             | -2.68                   | 0.00                       | 0.01                    | DN                  | DN                         | 0                   |
| 690 | 29008  | LY6E        | 6.72                 | 6.14                     | -0.57                             | -8.27                   | 0.00                       | 0.00                    | 0                   | DN                         | 0                   |
| 691 | 1752   | S100A4      | 9.01                 | 8.44                     | -0.57                             | -5.70                   | 0.01                       | 0.01                    | 0                   | DN                         | 0                   |
| 692 | 12171  | MYH10       | 1.11                 | 0.54                     | -0.57                             | -2.80                   | 0.00                       | 0.01                    | 0                   | DN                         | 0                   |
| 693 | 3550   | TSPAN14     | 4.81                 | 4.24                     | -0.57                             | -8.36                   | 0.01                       | 0.00                    | 0                   | DN                         | 0                   |
| 694 | 7246   | ULK1        | 3.35                 | 2.78                     | -0.57                             | -3.50                   | 0.00                       | 0.01                    | 0                   | DN                         | 0                   |
| 695 | 5827   | FLI1        | 5.56                 | 5.00                     | -0.57                             | -9.73                   | 0.00                       | 0.00                    | 0                   | DN                         | 0                   |
| 696 | 18459  | NFATC2      | 2.72                 | 2.15                     | -0.57                             | -6.64                   | 0.00                       | 0.01                    | 0                   | DN                         | 0                   |
| 697 | 7404   | EEF1DP3     | 1.00                 | 0.43                     | -0.57                             | -1.37                   | 0.00                       | 0.00                    | 0                   | DN                         | 0                   |
| 698 | 62     | MXRA8       | 1.43                 | 0.86                     | -0.57                             | -1.66                   | 0.00                       | 0.00                    | 0                   | DN                         | 0                   |
| 699 | 9810   | TLN2        | 2.91                 | 2.35                     | -0.57                             | -7.46                   | 0.01                       | 0.01                    | 0                   | DN                         | 0                   |
| 700 | 31191  | NXF3        | 6.13                 | 5.56                     | -0.57                             | -4.57                   | 0.01                       | 0.01                    | 0                   | DN                         | 0                   |
| 701 | 1061   | USP33       | 4.85                 | 4.28                     | -0.57                             | -4.03                   | 0.01                       | 0.00                    | 0                   | DN                         | 0                   |
| 702 | 8207   | KLHDC2      | 3.71                 | 3.14                     | -0.57                             | -4.10                   | 0.01                       | 0.01                    | 0                   | DN                         | 0                   |
| 703 | 12403  | C17orf103   | 0.90                 | 0.32                     | -0.57                             | -3.31                   | 0.01                       | 0.01                    | 0                   | DN                         | 0                   |
| 704 | 22974  | DCP2        | 3.51                 | 2.93                     | -0.57                             | -4.85                   | 0.00                       | 0.01                    | 0                   | DN                         | 0                   |
| 705 | 23759  | FAM8A1      | 2.34                 | 1.77                     | -0.57                             | -3.91                   | 0.01                       | 0.00                    | 0                   | DN                         | 0                   |
| 706 | 29108  | CBWD1       | 5.45                 | 4.89                     | -0.57                             | -4.64                   | 0.00                       | 0.01                    | 0                   | DN                         | DN                  |
| 707 | 3443   | KAT6B       | 2.30                 | 1.73                     | -0.57                             | -5.36                   | 0.01                       | 0.00                    | 0                   | DN                         | 0                   |
| 708 | 17274  | PDK1        | 7.64                 | 7.07                     | -0.57                             | -8.04                   | 0.00                       | 0.00                    | 0                   | DN                         | 0                   |
| 709 | 4763   | PTPRJ       | 2.55                 | 1.99                     | -0.57                             | -3.66                   | 0.01                       | 0.00                    | 0                   | DN                         | 0                   |
| 710 | 2830   | TRIM58      | 2.15                 | 1.58                     | -0.57                             | -2.70                   | 0.01                       | 0.01                    | 0                   | DN                         | 0                   |
| 711 | 2109   | ANKRD36BP1  | 3.28                 | 2.71                     | -0.57                             | -2.10                   | 0.00                       | 0.01                    | 0                   | DN                         | 0                   |
| 712 | 21427  | BOD1L1      | 3.03                 | 2.46                     | -0.57                             | -2.57                   | 0.00                       | 0.01                    | 0                   | DN                         | 0                   |
| 713 | 8679   | ATG2B       | 1.99                 | 1.41                     | -0.57                             | -4.27                   | 0.00                       | 0.00                    | 0                   | DN                         | 0                   |
| 714 | 1196   | PTBP2       | 3.27                 | 2.70                     | -0.57                             | -1.52                   | 0.00                       | 0.00                    | 0                   | DN                         | 0                   |
| 715 | 24851  | MDN1        | 2.90                 | 2.33                     | -0.57                             | -1.27                   | 0.01                       | 0.01                    | 0                   | DN                         | 0                   |
| 716 | 5920   | TSPAN9      | 1.13                 | 0.56                     | -0.57                             | -2.42                   | 0.00                       | 0.00                    | 0                   | DN                         | 0                   |
| 717 | 24026  | ZSCAN26     | 2.13                 | 1.56                     | -0.57                             | -2.80                   | 0.00                       | 0.01                    | 0                   | DN                         | 0                   |
| 718 | 28663  | AB209185    | 1.21                 | 0.64                     | -0.57                             | -1.01                   | 0.01                       | 0.00                    | 0                   | DN                         | 0                   |
| 719 | 9632   | CCPG1       | 6.50                 | 5.94                     | -0.56                             | -4.94                   | 0.01                       | 0.00                    | DN                  | DN                         | 0                   |
| 720 | 8161   | MIPOL1      | 2.08                 | 1.52                     | -0.56                             | -0.93                   | 0.00                       | 0.01                    | DN                  | DN                         | 0                   |
| 721 | 10080  | ADAMTS7     | 2.12                 | 1.56                     | -0.56                             | -2.86                   | 0.01                       | 0.01                    | 0                   | DN                         | 0                   |
| 722 | 27868  | EPHB6       | 2.30                 | 1.74                     | -0.56                             | -2.69                   | 0.01                       | 0.01                    | 0                   | DN                         | 0                   |
| 723 | 2519   | NEK2        | 4.89                 | 4.33                     | -0.56                             | -3.29                   | 0.00                       | 0.01                    | 0                   | DN                         | 0                   |

| #   | GeneID | Gene Symbol | U937.av.log2FPKM.Ctr | U937.av.log2FPKM.BRD0320 | <b>U937.log2FC.BRD0320.vs.Ctr</b> | U937.SNR.BRD0320.vs.Ctr | U937.Pvalue.BRD0320.vs.Ctr | U937.FDR.BRD0320.vs.Ctr | U937.BRD0705.vs.Ctr | <b>U937.BRD0320.vs.Ctr</b> | U937.BRD3731.vs.Ctr |
|-----|--------|-------------|----------------------|--------------------------|-----------------------------------|-------------------------|----------------------------|-------------------------|---------------------|----------------------------|---------------------|
| 724 | 30172  | C9orf78     | 5.93                 | 5.38                     | -0.56                             | -16.02                  | 0.00                       | 0.01                    | 0                   | DN                         | 0                   |
| 725 | 15223  | MEGF8       | 2.83                 | 2.27                     | -0.56                             | -3.99                   | 0.00                       | 0.01                    | 0                   | DN                         | 0                   |
| 726 | 17146  | RBM43       | 2.60                 | 2.04                     | -0.56                             | -5.23                   | 0.01                       | 0.00                    | 0                   | DN                         | 0                   |
| 727 | 2465   | FAM72A      | 4.90                 | 4.35                     | -0.56                             | -6.79                   | 0.00                       | 0.00                    | 0                   | DN                         | 0                   |
| 728 | 20946  | TRIM59      | 4.01                 | 3.45                     | -0.56                             | -7.87                   | 0.01                       | 0.00                    | 0                   | DN                         | 0                   |
| 729 | 24634  | BC042616    | 1.78                 | 1.22                     | -0.56                             | -1.84                   | 0.00                       | 0.00                    | 0                   | DN                         | 0                   |
| 730 | 17322  | TTC30B      | 2.04                 | 1.48                     | -0.56                             | -4.76                   | 0.00                       | 0.01                    | 0                   | DN                         | 0                   |
| 731 | 2728   | IRF2BP2     | 6.68                 | 6.11                     | -0.56                             | -19.55                  | 0.00                       | 0.01                    | 0                   | DN                         | 0                   |
| 732 | 23547  | CLK4        | 2.77                 | 2.20                     | -0.56                             | -3.42                   | 0.00                       | 0.01                    | 0                   | DN                         | 0                   |
| 733 | 5955   | DYRK4       | 4.47                 | 3.91                     | -0.56                             | -3.38                   | 0.01                       | 0.00                    | 0                   | DN                         | 0                   |
| 734 | 9355   | IVD         | 3.09                 | 2.52                     | -0.56                             | -4.88                   | 0.01                       | 0.00                    | 0                   | DN                         | 0                   |
| 735 | 16739  | LIPT1       | 3.59                 | 3.04                     | -0.56                             | -1.79                   | 0.01                       | 0.01                    | 0                   | DN                         | 0                   |
| 736 | 2774   | CHML        | 3.04                 | 2.48                     | -0.56                             | -6.77                   | 0.00                       | 0.01                    | 0                   | DN                         | 0                   |
| 737 | 12501  | ABHD15      | 3.09                 | 2.53                     | -0.56                             | -4.90                   | 0.01                       | 0.00                    | 0                   | DN                         | 0                   |
| 738 | 25245  | ARID1B      | 3.88                 | 3.32                     | -0.56                             | -5.03                   | 0.00                       | 0.00                    | 0                   | DN                         | 0                   |
| 739 | 13799  | MIB1        | 4.12                 | 3.56                     | -0.56                             | -6.84                   | 0.00                       | 0.00                    | 0                   | DN                         | 0                   |
| 740 | 23402  | SLU7        | 4.11                 | 3.56                     | -0.56                             | -2.13                   | 0.01                       | 0.01                    | 0                   | DN                         | DN                  |
| 741 | 27777  | KIAA1549    | 1.77                 | 1.22                     | -0.56                             | -3.66                   | 0.01                       | 0.01                    | 0                   | DN                         | 0                   |
| 742 | 4523   | CAT         | 6.88                 | 6.32                     | -0.56                             | -11.05                  | 0.01                       | 0.00                    | 0                   | DN                         | 0                   |
| 743 | 13216  | INTS2       | 2.83                 | 2.28                     | -0.56                             | -8.06                   | 0.01                       | 0.01                    | 0                   | DN                         | 0                   |
| 744 | 16874  | CKAP2L      | 4.59                 | 4.03                     | -0.56                             | -6.32                   | 0.01                       | 0.01                    | 0                   | DN                         | 0                   |
| 745 | 6847   | PLXNC1      | 3.56                 | 3.01                     | -0.56                             | -24.08                  | 0.00                       | 0.01                    | 0                   | DN                         | 0                   |
| 746 | 21995  | C4orf3      | 3.80                 | 3.23                     | -0.56                             | -3.17                   | 0.00                       | 0.01                    | 0                   | DN                         | 0                   |
| 747 | 13889  | PIK3C3      | 4.11                 | 3.55                     | -0.56                             | -4.22                   | 0.01                       | 0.00                    | 0                   | DN                         | 0                   |
| 748 | 24739  | PHF3        | 4.54                 | 3.98                     | -0.56                             | -7.30                   | 0.01                       | 0.01                    | 0                   | DN                         | 0                   |
| 749 | 25062  | MED23       | 3.65                 | 3.09                     | -0.56                             | -3.93                   | 0.00                       | 0.01                    | 0                   | DN                         | 0                   |
| 750 | 5215   | AK129926    | 0.88                 | 0.32                     | -0.56                             | -1.26                   | 0.01                       | 0.01                    | 0                   | DN                         | 0                   |
| 751 | 27585  | C7orf60     | 1.96                 | 1.40                     | -0.56                             | -4.13                   | 0.01                       | 0.01                    | 0                   | DN                         | 0                   |
| 752 | 1636   | GOLPH3L     | 3.60                 | 3.05                     | -0.56                             | -2.23                   | 0.00                       | 0.00                    | 0                   | DN                         | 0                   |
| 753 | 1767   | GATAD2B     | 3.43                 | 2.87                     | -0.56                             | -4.57                   | 0.00                       | 0.01                    | 0                   | DN                         | 0                   |
| 754 | 12251  | USP32P1     | 3.15                 | 2.59                     | -0.56                             | -0.92                   | 0.01                       | 0.00                    | 0                   | DN                         | 0                   |
| 755 | 23799  | CMAHP       | 2.28                 | 1.71                     | -0.56                             | -2.63                   | 0.00                       | 0.00                    | 0                   | DN                         | 0                   |
| 756 | 6369   | KMT2D       | 3.03                 | 2.48                     | -0.56                             | -1.02                   | 0.01                       | 0.00                    | 0                   | DN                         | 0                   |
| 757 | 19903  | NR1D2       | 3.11                 | 2.56                     | -0.55                             | -3.29                   | 0.01                       | 0.00                    | DN                  | DN                         | 0                   |
| 758 | 1816   | THBS3       | 1.89                 | 1.34                     | -0.55                             | -1.13                   | 0.00                       | 0.01                    | DN                  | DN                         | 0                   |
| 759 | 23510  | UNC5A       | 1.95                 | 1.40                     | -0.55                             | -6.25                   | 0.01                       | 0.01                    | 0                   | DN                         | 0                   |
| 760 | 24263  | PSMB9       | 3.79                 | 3.24                     | -0.55                             | -7.36                   | 0.00                       | 0.01                    | 0                   | DN                         | 0                   |

| #   | GeneID | Gene Symbol  | U937.av.log2FPKM.Ctr | U937.av.log2FPKM.BRD0320 | U937.log2FC.BRD0320.vs.Ctr | U937.SNR.BRD0320.vs.Ctr | U937.Pvalue.BRD0320.vs.Ctr | U937.FDR.BRD0320.vs.Ctr | U937.BRD0705.vs.Ctr | U937.BRD0320.vs.Ctr | U937.BRD3731.vs.Ctr |
|-----|--------|--------------|----------------------|--------------------------|----------------------------|-------------------------|----------------------------|-------------------------|---------------------|---------------------|---------------------|
| 761 | 551    | PTPRU        | 1.83                 | 1.28                     | -0.55                      | -3.70                   | 0.01                       | 0.01                    | 0                   | DN                  | 0                   |
| 762 | 22660  | DEPDC1B      | 4.87                 | 4.32                     | -0.55                      | -3.06                   | 0.00                       | 0.01                    | 0                   | DN                  | 0                   |
| 763 | 29943  | CDC26        | 4.30                 | 3.74                     | -0.55                      | -4.62                   | 0.00                       | 0.01                    | 0                   | DN                  | DN                  |
| 764 | 11051  | ACSM3        | 2.19                 | 1.64                     | -0.55                      | -5.47                   | 0.01                       | 0.01                    | 0                   | DN                  | 0                   |
| 765 | 3611   | FAS          | 1.80                 | 1.25                     | -0.55                      | -6.21                   | 0.01                       | 0.00                    | 0                   | DN                  | 0                   |
| 766 | 19727  | RABL2B       | 2.94                 | 2.39                     | -0.55                      | -2.77                   | 0.01                       | 0.00                    | 0                   | DN                  | 0                   |
| 767 | 20987  | GPR160       | 3.91                 | 3.35                     | -0.55                      | -2.51                   | 0.01                       | 0.01                    | 0                   | DN                  | 0                   |
| 768 | 16120  | CENPA        | 5.65                 | 5.10                     | -0.55                      | -4.02                   | 0.01                       | 0.01                    | 0                   | DN                  | 0                   |
| 769 | 18525  | FAM217B      | 3.99                 | 3.44                     | -0.55                      | -3.92                   | 0.01                       | 0.01                    | 0                   | DN                  | 0                   |
| 770 | 10255  | TICRR        | 3.33                 | 2.78                     | -0.55                      | -2.29                   | 0.00                       | 0.01                    | 0                   | DN                  | 0                   |
| 771 | 31579  | CETN2        | 4.93                 | 4.37                     | -0.55                      | -2.69                   | 0.00                       | 0.00                    | 0                   | DN                  | 0                   |
| 772 | 11192  | LOC100289092 | 3.15                 | 2.60                     | -0.55                      | -1.11                   | 0.00                       | 0.01                    | 0                   | DN                  | 0                   |
| 773 | 9894   | ANP32A       | 7.99                 | 7.44                     | -0.55                      | -11.10                  | 0.00                       | 0.00                    | 0                   | DN                  | 0                   |
| 774 | 27257  | GSAP         | 3.41                 | 2.87                     | -0.55                      | -4.82                   | 0.00                       | 0.00                    | 0                   | DN                  | 0                   |
| 775 | 24564  | TRERF1       | 4.84                 | 4.29                     | -0.55                      | -4.43                   | 0.00                       | 0.00                    | 0                   | DN                  | 0                   |
| 776 | 4534   | DQ573949     | 1.08                 | 0.53                     | -0.55                      | -2.44                   | 0.01                       | 0.00                    | 0                   | DN                  | 0                   |
| 777 | 23416  | HMMR         | 4.98                 | 4.42                     | -0.55                      | -6.58                   | 0.01                       | 0.01                    | 0                   | DN                  | 0                   |
| 778 | 21688  | SULT1B1      | 0.83                 | 0.29                     | -0.55                      | -1.56                   | 0.01                       | 0.01                    | 0                   | DN                  | 0                   |
| 779 | 21917  | CENPE        | 4.11                 | 3.56                     | -0.55                      | -3.00                   | 0.00                       | 0.00                    | 0                   | DN                  | 0                   |
| 780 | 23350  | SAP30L       | 2.54                 | 1.99                     | -0.55                      | -5.24                   | 0.00                       | 0.00                    | 0                   | DN                  | 0                   |
| 781 | 181    | H6PD         | 3.67                 | 3.12                     | -0.55                      | -10.00                  | 0.00                       | 0.00                    | 0                   | DN                  | 0                   |
| 782 | 28977  | DQ574852     | 3.77                 | 3.23                     | -0.55                      | -2.17                   | 0.00                       | 0.00                    | 0                   | DN                  | 0                   |
| 783 | 16382  | PAPOLG       | 2.35                 | 1.80                     | -0.55                      | -5.60                   | 0.00                       | 0.00                    | 0                   | DN                  | 0                   |
| 784 | 995    | LEPR         | 2.18                 | 1.63                     | -0.55                      | -2.84                   | 0.01                       | 0.01                    | 0                   | DN                  | 0                   |
| 785 | 19020  | CECR6        | 1.68                 | 1.13                     | -0.55                      | -2.62                   | 0.00                       | 0.00                    | 0                   | DN                  | 0                   |
| 786 | 1498   | AK123675     | 4.49                 | 3.94                     | -0.55                      | -2.96                   | 0.00                       | 0.00                    | 0                   | DN                  | 0                   |
| 787 | 20042  | ZNF445       | 2.51                 | 1.96                     | -0.55                      | -2.43                   | 0.01                       | 0.00                    | 0                   | DN                  | 0                   |
| 788 | 27782  | UBN2         | 1.81                 | 1.25                     | -0.55                      | -1.67                   | 0.01                       | 0.01                    | 0                   | DN                  | 0                   |
| 789 | 24789  | PHIP         | 3.24                 | 2.69                     | -0.55                      | -2.08                   | 0.01                       | 0.01                    | 0                   | DN                  | 0                   |
| 790 | 9414   | DQ586540     | 1.68                 | 1.13                     | -0.55                      | -1.88                   | 0.00                       | 0.01                    | 0                   | DN                  | 0                   |
| 791 | 16491  | ZNF638       | 4.46                 | 3.91                     | -0.55                      | -4.40                   | 0.00                       | 0.00                    | 0                   | DN                  | 0                   |
| 792 | 24800  | TTK          | 4.87                 | 4.32                     | -0.55                      | -3.29                   | 0.01                       | 0.01                    | 0                   | DN                  | 0                   |
| 793 | 10453  | DNM1P46      | 1.38                 | 0.84                     | -0.55                      | -1.48                   | 0.00                       | 0.01                    | 0                   | DN                  | 0                   |
| 794 | 8013   | ABHD4        | 3.24                 | 2.69                     | -0.55                      | -3.95                   | 0.00                       | 0.00                    | 0                   | DN                  | 0                   |
| 795 | 31230  | TBC1D8B      | 1.73                 | 1.18                     | -0.55                      | -1.14                   | 0.00                       | 0.00                    | 0                   | DN                  | 0                   |
| 796 | 17329  | BX538254     | 1.74                 | 1.20                     | -0.55                      | -2.79                   | 0.00                       | 0.01                    | 0                   | DN                  | 0                   |
| 797 | 15809  | TMEM86B      | 3.30                 | 2.75                     | -0.54                      | -1.31                   | 0.00                       | 0.00                    | 0                   | DN                  | 0                   |

| #   | GeneID | Gene Symbol | U937.av.log2FPKM.Ctr | U937.av.log2FPKM.BRD0320 | <b>U937.log2FC.BRD0320.vs.Ctr</b> | U937.SNR.BRD0320.vs.Ctr | U937.Pvalue.BRD0320.vs.Ctr | U937.FDR.BRD0320.vs.Ctr | U937.BRD0705.vs.Ctr | <b>U937.BRD0320.vs.Ctr</b> | U937.BRD3731.vs.Ctr |
|-----|--------|-------------|----------------------|--------------------------|-----------------------------------|-------------------------|----------------------------|-------------------------|---------------------|----------------------------|---------------------|
| 798 | 7570   | BC045725    | 1.21                 | 0.67                     | -0.54                             | -1.26                   | 0.00                       | 0.00                    | 0                   | DN                         | 0                   |
| 799 | 27576  | IMMP2L      | 2.89                 | 2.35                     | -0.54                             | -5.83                   | 0.01                       | 0.01                    | 0                   | DN                         | 0                   |
| 800 | 705    | BMP8B       | 2.29                 | 1.76                     | -0.54                             | -2.61                   | 0.00                       | 0.00                    | 0                   | DN                         | 0                   |
| 801 | 2802   | TFB2M       | 5.14                 | 4.59                     | -0.54                             | -2.76                   | 0.01                       | 0.00                    | 0                   | DN                         | 0                   |
| 802 | 28250  | CSGALNACT1  | 1.49                 | 0.96                     | -0.54                             | -2.32                   | 0.00                       | 0.01                    | 0                   | DN                         | 0                   |
| 803 | 5594   | FDXACB1     | 2.20                 | 1.66                     | -0.54                             | -2.66                   | 0.00                       | 0.01                    | 0                   | DN                         | 0                   |
| 804 | 947    | OMA1        | 4.03                 | 3.48                     | -0.54                             | -3.18                   | 0.01                       | 0.01                    | 0                   | DN                         | 0                   |
| 805 | 30206  | NTNG2       | 1.87                 | 1.33                     | -0.54                             | -1.79                   | 0.00                       | 0.00                    | 0                   | DN                         | 0                   |
| 806 | 30991  | MSN         | 8.96                 | 8.43                     | -0.54                             | -9.75                   | 0.01                       | 0.00                    | 0                   | DN                         | 0                   |
| 807 | 1261   | STXBP3      | 4.20                 | 3.66                     | -0.54                             | -5.35                   | 0.01                       | 0.00                    | 0                   | DN                         | 0                   |
| 808 | 2098   | RCSD1       | 5.55                 | 5.01                     | -0.54                             | -5.02                   | 0.01                       | 0.01                    | 0                   | DN                         | 0                   |
| 809 | 3769   | C10orf2     | 4.59                 | 4.05                     | -0.54                             | -5.32                   | 0.01                       | 0.00                    | 0                   | DN                         | 0                   |
| 810 | 7321   | SACS        | 3.68                 | 3.14                     | -0.54                             | -2.94                   | 0.01                       | 0.01                    | 0                   | DN                         | 0                   |
| 811 | 20849  | HLTF        | 4.65                 | 4.11                     | -0.54                             | -4.89                   | 0.00                       | 0.00                    | 0                   | DN                         | 0                   |
| 812 | 1156   | GLMN        | 4.18                 | 3.64                     | -0.54                             | -7.25                   | 0.01                       | 0.00                    | 0                   | DN                         | 0                   |
| 813 | 29933  | SNX30       | 2.47                 | 1.93                     | -0.54                             | -9.72                   | 0.00                       | 0.00                    | 0                   | DN                         | 0                   |
| 814 | 16444  | APLF        | 1.35                 | 0.81                     | -0.54                             | -3.24                   | 0.01                       | 0.00                    | 0                   | DN                         | 0                   |
| 815 | 17155  | CACNB4      | 1.66                 | 1.12                     | -0.54                             | -4.07                   | 0.00                       | 0.01                    | 0                   | DN                         | 0                   |
| 816 | 23579  | CNOT6       | 4.01                 | 3.47                     | -0.54                             | -12.10                  | 0.01                       | 0.00                    | 0                   | DN                         | 0                   |
| 817 | 18130  | FRG1B       | 4.27                 | 3.73                     | -0.54                             | -1.83                   | 0.01                       | 0.00                    | 0                   | DN                         | 0                   |
| 818 | 16025  | ROCK2       | 4.16                 | 3.63                     | -0.54                             | -4.70                   | 0.01                       | 0.01                    | 0                   | DN                         | 0                   |
| 819 | 13180  | DHX40       | 3.80                 | 3.26                     | -0.54                             | -1.40                   | 0.00                       | 0.00                    | 0                   | DN                         | 0                   |
| 820 | 8424   | NUMB        | 4.05                 | 3.51                     | -0.54                             | -2.70                   | 0.00                       | 0.01                    | 0                   | DN                         | DN                  |
| 821 | 28852  | MTBP        | 3.50                 | 2.96                     | -0.54                             | -5.60                   | 0.01                       | 0.00                    | 0                   | DN                         | 0                   |
| 822 | 13860  | ZNF397      | 2.37                 | 1.83                     | -0.54                             | -1.36                   | 0.01                       | 0.01                    | 0                   | DN                         | 0                   |
| 823 | 29512  | PGM5P2      | 1.06                 | 0.52                     | -0.54                             | -3.08                   | 0.00                       | 0.01                    | 0                   | DN                         | 0                   |
| 824 | 1191   | RWDD3       | 3.00                 | 2.47                     | -0.53                             | -2.07                   | 0.00                       | 0.01                    | DN                  | DN                         | 0                   |
| 825 | 11027  | SMG1        | 3.61                 | 3.09                     | -0.53                             | -1.31                   | 0.01                       | 0.01                    | DN                  | DN                         | 0                   |
| 826 | 22654  | GAPT        | 2.58                 | 2.05                     | -0.53                             | -1.86                   | 0.00                       | 0.01                    | 0                   | DN                         | DN                  |
| 827 | 4952   | TMEM216     | 3.11                 | 2.57                     | -0.53                             | -1.68                   | 0.01                       | 0.00                    | 0                   | DN                         | 0                   |
| 828 | 332    | PADI2       | 1.31                 | 0.78                     | -0.53                             | -3.11                   | 0.01                       | 0.00                    | 0                   | DN                         | 0                   |
| 829 | 1158   | GFI1        | 6.39                 | 5.85                     | -0.53                             | -10.20                  | 0.01                       | 0.01                    | 0                   | DN                         | 0                   |
| 830 | 9357   | CHST14      | 4.30                 | 3.77                     | -0.53                             | -4.37                   | 0.01                       | 0.01                    | 0                   | DN                         | 0                   |
| 831 | 11957  | ITGAE       | 4.27                 | 3.74                     | -0.53                             | -1.27                   | 0.01                       | 0.00                    | 0                   | DN                         | 0                   |
| 832 | 9371   | SPINT1      | 3.14                 | 2.61                     | -0.53                             | -3.43                   | 0.00                       | 0.00                    | 0                   | DN                         | 0                   |
| 833 | 18710  | N6AMT1      | 2.84                 | 2.31                     | -0.53                             | -5.44                   | 0.01                       | 0.01                    | 0                   | DN                         | 0                   |
| 834 | 13361  | RAB37       | 4.60                 | 4.06                     | -0.53                             | -4.95                   | 0.01                       | 0.00                    | 0                   | DN                         | 0                   |



| #   | GeneID | Gene Symbol    | U937.av.log2FPKM.Ctr | U937.av.log2FPKM.BRD0320 | <b>U937.log2FC.BRD0320.vs.Ctr</b> | U937.SNR.BRD0320.vs.Ctr | U937.Pvalue.BRD0320.vs.Ctr | U937.FDR.BRD0320.vs.Ctr | U937.BRD0705.vs.Ctr | <b>U937.BRD0320.vs.Ctr</b> | U937.BRD3731.vs.Ctr |
|-----|--------|----------------|----------------------|--------------------------|-----------------------------------|-------------------------|----------------------------|-------------------------|---------------------|----------------------------|---------------------|
| 835 | 19935  | GPD1L          | 3.81                 | 3.28                     | -0.53                             | -7.26                   | 0.00                       | 0.01                    | 0                   | DN                         | 0                   |
| 836 | 3705   | ARHGAP19-SLIT1 | 4.45                 | 3.93                     | -0.53                             | -5.96                   | 0.01                       | 0.00                    | 0                   | DN                         | 0                   |
| 837 | 26674  | RPA3           | 4.58                 | 4.04                     | -0.53                             | -2.36                   | 0.01                       | 0.00                    | 0                   | DN                         | 0                   |
| 838 | 4963   | MYRF           | 2.38                 | 1.85                     | -0.53                             | -2.37                   | 0.01                       | 0.00                    | 0                   | DN                         | DN                  |
| 839 | 22314  | MLF1IP         | 5.57                 | 5.04                     | -0.53                             | -4.09                   | 0.00                       | 0.01                    | 0                   | DN                         | 0                   |
| 840 | 31099  | CYSLTR1        | 4.39                 | 3.87                     | -0.53                             | -2.84                   | 0.01                       | 0.01                    | 0                   | DN                         | 0                   |
| 841 | 20256  | GLT8D1         | 4.99                 | 4.46                     | -0.53                             | -4.71                   | 0.00                       | 0.01                    | 0                   | DN                         | 0                   |
| 842 | 2398   | PPFIA4         | 0.86                 | 0.33                     | -0.53                             | -2.90                   | 0.00                       | 0.01                    | 0                   | DN                         | 0                   |
| 843 | 4044   | VENTX          | 2.68                 | 2.16                     | -0.53                             | -1.50                   | 0.01                       | 0.01                    | 0                   | DN                         | 0                   |
| 844 | 24466  | FKBP5          | 7.98                 | 7.45                     | -0.53                             | -11.63                  | 0.00                       | 0.01                    | 0                   | DN                         | 0                   |
| 845 | 26787  | HOXA13         | 4.97                 | 4.45                     | -0.53                             | -4.21                   | 0.00                       | 0.00                    | 0                   | DN                         | 0                   |
| 846 | 913    | TCEANC2        | 2.71                 | 2.18                     | -0.53                             | -9.07                   | 0.01                       | 0.01                    | 0                   | DN                         | 0                   |
| 847 | 9380   | OIP5-AS1       | 5.17                 | 4.65                     | -0.53                             | -4.53                   | 0.00                       | 0.00                    | 0                   | DN                         | 0                   |
| 848 | 771    | PTPRF          | 1.43                 | 0.91                     | -0.53                             | -4.95                   | 0.00                       | 0.01                    | 0                   | DN                         | 0                   |
| 849 | 13215  | BRIP1          | 2.64                 | 2.11                     | -0.53                             | -4.79                   | 0.01                       | 0.01                    | 0                   | DN                         | 0                   |
| 850 | 13066  | SPOP           | 4.32                 | 3.79                     | -0.53                             | -5.12                   | 0.00                       | 0.01                    | 0                   | DN                         | 0                   |
| 851 | 23034  | PRRC1          | 4.69                 | 4.16                     | -0.53                             | -6.19                   | 0.00                       | 0.01                    | 0                   | DN                         | 0                   |
| 852 | 29017  | RHPN1          | 1.50                 | 0.97                     | -0.53                             | -5.41                   | 0.01                       | 0.00                    | 0                   | DN                         | 0                   |
| 853 | 7198   | ZNF664         | 5.47                 | 4.93                     | -0.53                             | -6.41                   | 0.01                       | 0.01                    | 0                   | DN                         | 0                   |
| 854 | 13445  | MXRA7          | 3.82                 | 3.29                     | -0.53                             | -10.63                  | 0.01                       | 0.01                    | 0                   | DN                         | 0                   |
| 855 | 5777   | SPA17          | 1.70                 | 1.17                     | -0.53                             | -1.17                   | 0.01                       | 0.00                    | 0                   | DN                         | 0                   |
| 856 | 9394   | JMJD7          | 3.43                 | 2.90                     | -0.53                             | -1.20                   | 0.00                       | 0.00                    | 0                   | DN                         | 0                   |
| 857 | 907    | YIPF1          | 2.99                 | 2.46                     | -0.53                             | -2.75                   | 0.01                       | 0.00                    | 0                   | DN                         | 0                   |
| 858 | 21643  | REST           | 3.33                 | 2.79                     | -0.53                             | -2.31                   | 0.00                       | 0.01                    | 0                   | DN                         | 0                   |
| 859 | 23022  | CSNK1G3        | 2.93                 | 2.40                     | -0.53                             | -5.54                   | 0.00                       | 0.00                    | 0                   | DN                         | 0                   |
| 860 | 20132  | IP6K2          | 4.63                 | 4.10                     | -0.53                             | -4.51                   | 0.00                       | 0.00                    | 0                   | DN                         | 0                   |
| 861 | 24585  | KLC4           | 2.96                 | 2.43                     | -0.53                             | -2.25                   | 0.01                       | 0.01                    | 0                   | DN                         | 0                   |
| 862 | 22350  | FRG1           | 5.23                 | 4.70                     | -0.53                             | -4.08                   | 0.01                       | 0.00                    | 0                   | DN                         | 0                   |
| 863 | 22996  | SEMA6A         | 1.22                 | 0.69                     | -0.53                             | -3.46                   | 0.00                       | 0.00                    | 0                   | DN                         | 0                   |
| 864 | 13400  | MYO15B         | 1.37                 | 0.84                     | -0.53                             | -0.92                   | 0.01                       | 0.01                    | 0                   | DN                         | 0                   |
| 865 | 5377   | AAMDC          | 2.79                 | 2.26                     | -0.53                             | -1.85                   | 0.01                       | 0.00                    | 0                   | DN                         | 0                   |
| 866 | 31240  | TSC22D3        | 3.79                 | 3.26                     | -0.53                             | -6.28                   | 0.00                       | 0.01                    | 0                   | DN                         | 0                   |
| 867 | 7146   | LOC338799      | 2.11                 | 1.59                     | -0.52                             | -1.18                   | 0.00                       | 0.01                    | DN                  | DN                         | 0                   |
| 868 | 10215  | DQ596274       | 2.69                 | 2.17                     | -0.52                             | -0.96                   | 0.00                       | 0.00                    | 0                   | DN                         | 0                   |
| 869 | 5712   | LOC100499227   | 1.70                 | 1.19                     | -0.52                             | -2.03                   | 0.01                       | 0.00                    | 0                   | DN                         | 0                   |
| 870 | 11773  | C16orf74       | 4.00                 | 3.49                     | -0.52                             | -2.32                   | 0.01                       | 0.00                    | 0                   | DN                         | 0                   |
| 871 | 18984  | S100B          | 2.58                 | 2.05                     | -0.52                             | -2.06                   | 0.01                       | 0.00                    | 0                   | DN                         | DN                  |

| #   | GeneID | Gene Symbol | U937.av.log2FPKM.Ctr | U937.av.log2FPKM.BRD0320 | <b>U937.log2FC.BRD0320.vs.Ctr</b> | U937.SNR.BRD0320.vs.Ctr | U937.Pvalue.BRD0320.vs.Ctr | U937.FDR.BRD0320.vs.Ctr | U937.BRD0705.vs.Ctr | <b>U937.BRD0320.vs.Ctr</b> | U937.BRD3731.vs.Ctr |
|-----|--------|-------------|----------------------|--------------------------|-----------------------------------|-------------------------|----------------------------|-------------------------|---------------------|----------------------------|---------------------|
| 872 | 28026  | PRKAG2-AS1  | 3.45                 | 2.93                     | -0.52                             | -2.10                   | 0.01                       | 0.00                    | 0                   | DN                         | 0                   |
| 873 | 659    | CSF3R       | 3.98                 | 3.47                     | -0.52                             | -5.74                   | 0.00                       | 0.00                    | 0                   | DN                         | 0                   |
| 874 | 13566  | RAC3        | 4.00                 | 3.48                     | -0.52                             | -2.83                   | 0.01                       | 0.01                    | 0                   | DN                         | 0                   |
| 875 | 29893  | CTNNAL1     | 5.44                 | 4.91                     | -0.52                             | -9.43                   | 0.01                       | 0.00                    | 0                   | DN                         | 0                   |
| 876 | 5790   | TMEM218     | 2.63                 | 2.11                     | -0.52                             | -5.01                   | 0.00                       | 0.01                    | 0                   | DN                         | 0                   |
| 877 | 14061  | TSHZ1       | 3.80                 | 3.29                     | -0.52                             | -2.70                   | 0.00                       | 0.01                    | 0                   | DN                         | DN                  |
| 878 | 4414   | NUCB2       | 8.09                 | 7.57                     | -0.52                             | -7.34                   | 0.01                       | 0.01                    | 0                   | DN                         | 0                   |
| 879 | 19546  | MKL1        | 4.22                 | 3.70                     | -0.52                             | -3.47                   | 0.00                       | 0.01                    | 0                   | DN                         | 0                   |
| 880 | 29868  | NIPSNAP3A   | 5.62                 | 5.10                     | -0.52                             | -2.69                   | 0.01                       | 0.00                    | 0                   | DN                         | 0                   |
| 881 | 11219  | C16orf54    | 3.21                 | 2.69                     | -0.52                             | -5.19                   | 0.00                       | 0.00                    | 0                   | DN                         | 0                   |
| 882 | 1655   | TNFAIP8L2   | 4.35                 | 3.83                     | -0.52                             | -3.84                   | 0.00                       | 0.00                    | 0                   | DN                         | 0                   |
| 883 | 30050  | OLFML2A     | 1.08                 | 0.57                     | -0.52                             | -6.42                   | 0.00                       | 0.01                    | 0                   | DN                         | 0                   |
| 884 | 7386   | HMGB1       | 8.60                 | 8.08                     | -0.52                             | -10.69                  | 0.01                       | 0.01                    | 0                   | DN                         | 0                   |
| 885 | 10998  | NDE1        | 4.75                 | 4.24                     | -0.52                             | -4.81                   | 0.00                       | 0.00                    | 0                   | DN                         | 0                   |
| 886 | 20662  | TXNRD3      | 3.02                 | 2.50                     | -0.52                             | -2.46                   | 0.00                       | 0.01                    | 0                   | DN                         | 0                   |
| 887 | 23188  | IK          | 5.96                 | 5.44                     | -0.52                             | -6.20                   | 0.01                       | 0.01                    | 0                   | DN                         | DN                  |
| 888 | 880    | BTF3L4      | 4.32                 | 3.80                     | -0.52                             | -4.23                   | 0.00                       | 0.00                    | 0                   | DN                         | 0                   |
| 889 | 1258   | HENMT1      | 4.90                 | 4.38                     | -0.52                             | -4.04                   | 0.01                       | 0.01                    | 0                   | DN                         | 0                   |
| 890 | 5290   | ANAPC15     | 4.79                 | 4.27                     | -0.52                             | -3.36                   | 0.00                       | 0.00                    | 0                   | DN                         | 0                   |
| 891 | 16853  | BCL2L11     | 4.02                 | 3.50                     | -0.52                             | -5.88                   | 0.01                       | 0.00                    | 0                   | DN                         | 0                   |
| 892 | 28070  | ESYT2       | 6.61                 | 6.09                     | -0.52                             | -3.38                   | 0.00                       | 0.00                    | 0                   | DN                         | 0                   |
| 893 | 5549   | AASDHPPT    | 5.36                 | 4.85                     | -0.52                             | -5.72                   | 0.01                       | 0.00                    | 0                   | DN                         | 0                   |
| 894 | 10746  | HAGH        | 3.15                 | 2.63                     | -0.52                             | -3.04                   | 0.01                       | 0.01                    | 0                   | DN                         | 0                   |
| 895 | 16024  | PQLC3       | 3.52                 | 3.00                     | -0.52                             | -3.18                   | 0.01                       | 0.01                    | 0                   | DN                         | 0                   |
| 896 | 21022  | TBL1XR1     | 5.01                 | 4.49                     | -0.52                             | -25.08                  | 0.00                       | 0.01                    | 0                   | DN                         | 0                   |
| 897 | 2797   | EFCAB2      | 3.28                 | 2.76                     | -0.52                             | -2.20                   | 0.00                       | 0.00                    | 0                   | DN                         | 0                   |
| 898 | 18112  | AX747658    | 1.72                 | 1.19                     | -0.52                             | -1.01                   | 0.01                       | 0.00                    | 0                   | DN                         | 0                   |
| 899 | 7215   | TMEM132B    | 1.94                 | 1.41                     | -0.52                             | -4.46                   | 0.01                       | 0.00                    | 0                   | DN                         | 0                   |
| 900 | 16332  | ASB3        | 3.52                 | 2.99                     | -0.52                             | -2.43                   | 0.01                       | 0.01                    | 0                   | DN                         | 0                   |
| 901 | 1385   | SLC22A15    | 2.59                 | 2.07                     | -0.52                             | -3.84                   | 0.00                       | 0.00                    | 0                   | DN                         | 0                   |
| 902 | 14886  | DPY19L3     | 3.70                 | 3.18                     | -0.52                             | -2.68                   | 0.01                       | 0.00                    | 0                   | DN                         | 0                   |
| 903 | 14339  | INSR        | 2.54                 | 2.02                     | -0.52                             | -3.11                   | 0.01                       | 0.00                    | 0                   | DN                         | 0                   |
| 904 | 23534  | LOC202181   | 1.96                 | 1.45                     | -0.52                             | -0.77                   | 0.01                       | 0.01                    | 0                   | DN                         | 0                   |
| 905 | 4719   | PHF21A      | 2.44                 | 1.92                     | -0.52                             | -2.39                   | 0.00                       | 0.00                    | 0                   | DN                         | 0                   |
| 906 | 16208  | YIPF4       | 4.21                 | 3.69                     | -0.52                             | -2.88                   | 0.00                       | 0.00                    | 0                   | DN                         | 0                   |
| 907 | 6874   | AX747187    | 2.59                 | 2.07                     | -0.52                             | -0.93                   | 0.01                       | 0.00                    | 0                   | DN                         | 0                   |
| 908 | 22843  | MTRNR2L2    | 9.15                 | 8.63                     | -0.52                             | -2.11                   | 0.00                       | 0.00                    | 0                   | DN                         | 0                   |

| #   | GeneID | Gene Symbol | U937.av.log2FPKM.Ctr | U937.av.log2FPKM.BRD0320 | U937.log2FC.BRD0320.vs.Ctr | U937.SNR.BRD0320.vs.Ctr | U937.Pvalue.BRD0320.vs.Ctr | U937.FDR.BRD0320.vs.Ctr | U937.BRD0705.vs.Ctr | U937.BRD0320.vs.Ctr | U937.BRD3731.vs.Ctr |
|-----|--------|-------------|----------------------|--------------------------|----------------------------|-------------------------|----------------------------|-------------------------|---------------------|---------------------|---------------------|
| 909 | 31092  | ATRX        | 3.46                 | 2.94                     | -0.52                      | -3.18                   | 0.01                       | 0.00                    | 0                   | DN                  | 0                   |
| 910 | 30542  | MSL3        | 4.09                 | 3.57                     | -0.52                      | -4.53                   | 0.01                       | 0.00                    | 0                   | DN                  | 0                   |
| 911 | 9823   | AK091624    | 3.41                 | 2.88                     | -0.52                      | -1.43                   | 0.01                       | 0.01                    | 0                   | DN                  | 0                   |
| 912 | 31219  | LOC286437   | 2.32                 | 1.80                     | -0.52                      | -1.62                   | 0.00                       | 0.01                    | 0                   | DN                  | 0                   |
| 913 | 29507  | LOC642236   | 2.00                 | 1.49                     | -0.52                      | -3.12                   | 0.00                       | 0.01                    | 0                   | DN                  | 0                   |
| 914 | 12309  | USP32P2     | 1.31                 | 0.80                     | -0.51                      | -1.39                   | 0.01                       | 0.01                    | DN                  | DN                  | 0                   |
| 915 | 22935  | PAM         | 3.30                 | 2.78                     | -0.51                      | -1.36                   | 0.01                       | 0.00                    | 0                   | DN                  | 0                   |
| 916 | 20098  | KIF9        | 3.19                 | 2.68                     | -0.51                      | -1.11                   | 0.00                       | 0.01                    | 0                   | DN                  | 0                   |
| 917 | 19148  | TMEM191C    | 1.61                 | 1.09                     | -0.51                      | -2.45                   | 0.01                       | 0.00                    | 0                   | DN                  | 0                   |
| 918 | 29391  | PAX5        | 2.14                 | 1.63                     | -0.51                      | -1.43                   | 0.01                       | 0.00                    | 0                   | DN                  | 0                   |
| 919 | 19228  | CABIN1      | 4.99                 | 4.48                     | -0.51                      | -6.47                   | 0.00                       | 0.01                    | 0                   | DN                  | 0                   |
| 920 | 10787  | ABCA3       | 2.80                 | 2.29                     | -0.51                      | -2.20                   | 0.00                       | 0.00                    | 0                   | DN                  | 0                   |
| 921 | 16324  | MSH6        | 5.58                 | 5.07                     | -0.51                      | -20.50                  | 0.01                       | 0.01                    | 0                   | DN                  | 0                   |
| 922 | 15817  | SUV420H2    | 3.45                 | 2.94                     | -0.51                      | -3.73                   | 0.01                       | 0.00                    | 0                   | DN                  | 0                   |
| 923 | 20263  | MUSTN1      | 4.14                 | 3.63                     | -0.51                      | -2.58                   | 0.01                       | 0.00                    | 0                   | DN                  | 0                   |
| 924 | 25268  | TAGAP       | 3.38                 | 2.87                     | -0.51                      | -3.75                   | 0.00                       | 0.01                    | 0                   | DN                  | 0                   |
| 925 | 9381   | BC067230    | 5.07                 | 4.57                     | -0.51                      | -20.76                  | 0.01                       | 0.01                    | 0                   | DN                  | 0                   |
| 926 | 30560  | TRAPPC2     | 2.87                 | 2.37                     | -0.51                      | -2.59                   | 0.01                       | 0.01                    | 0                   | DN                  | 0                   |
| 927 | 22691  | NLN         | 4.69                 | 4.18                     | -0.51                      | -4.09                   | 0.00                       | 0.01                    | 0                   | DN                  | 0                   |
| 928 | 30402  | AF079515    | 8.19                 | 7.67                     | -0.51                      | -4.94                   | 0.00                       | 0.00                    | 0                   | DN                  | 0                   |
| 929 | 23777  | MBOAT1      | 2.28                 | 1.78                     | -0.51                      | -2.99                   | 0.01                       | 0.01                    | 0                   | DN                  | 0                   |
| 930 | 20167  | RNF123      | 4.10                 | 3.59                     | -0.51                      | -4.53                   | 0.00                       | 0.00                    | 0                   | DN                  | 0                   |
| 931 | 21237  | FYTTD1      | 4.60                 | 4.09                     | -0.51                      | -4.90                   | 0.00                       | 0.00                    | 0                   | DN                  | 0                   |
| 932 | 16164  | MRPL33      | 6.22                 | 5.70                     | -0.51                      | -3.82                   | 0.01                       | 0.01                    | 0                   | DN                  | 0                   |
| 933 | 16436  | ETAA1       | 2.92                 | 2.41                     | -0.51                      | -5.05                   | 0.00                       | 0.00                    | 0                   | DN                  | 0                   |
| 934 | 20363  | FRMD4B      | 2.23                 | 1.72                     | -0.51                      | -3.81                   | 0.00                       | 0.00                    | 0                   | DN                  | 0                   |
| 935 | 16862  | TMEM87B     | 4.00                 | 3.49                     | -0.51                      | -6.98                   | 0.01                       | 0.01                    | 0                   | DN                  | 0                   |
| 936 | 13645  | SMCHD1      | 4.95                 | 4.44                     | -0.51                      | -4.69                   | 0.00                       | 0.00                    | 0                   | DN                  | 0                   |
| 937 | 13748  | GNAL        | 1.02                 | 0.51                     | -0.51                      | -6.63                   | 0.00                       | 0.01                    | 0                   | DN                  | 0                   |
| 938 | 30666  | GK          | 4.23                 | 3.72                     | -0.51                      | -3.54                   | 0.01                       | 0.00                    | 0                   | DN                  | 0                   |
| 939 | 12090  | CHRNA1      | 1.76                 | 1.25                     | -0.51                      | -1.69                   | 0.01                       | 0.00                    | 0                   | DN                  | 0                   |
| 940 | 16287  | PPM1B       | 5.06                 | 4.55                     | -0.51                      | -8.24                   | 0.00                       | 0.00                    | 0                   | DN                  | 0                   |
| 941 | 9273   | WHAMMP1     | 4.59                 | 4.07                     | -0.51                      | -1.15                   | 0.00                       | 0.01                    | 0                   | DN                  | 0                   |
| 942 | 18078  | CR627206    | 1.19                 | 0.68                     | -0.51                      | -1.38                   | 0.00                       | 0.01                    | 0                   | DN                  | 0                   |
| 943 | 27325  | RBM48       | 3.08                 | 2.57                     | -0.51                      | -2.51                   | 0.01                       | 0.00                    | 0                   | DN                  | 0                   |
| 944 | 31038  | OGT         | 5.86                 | 5.35                     | -0.51                      | -1.49                   | 0.01                       | 0.01                    | 0                   | DN                  | 0                   |
| 945 | 29277  | AX747756    | 3.13                 | 2.62                     | -0.51                      | -0.97                   | 0.01                       | 0.01                    | 0                   | DN                  | 0                   |

| #   | GeneID | Gene Symbol  | U937.av.log2FPKM.Ctr | U937.av.log2FPKM.BRD0320 | U937.log2FC.BRD0320.vs.Ctr | U937.SNR.BRD0320.vs.Ctr | U937.Pvalue.BRD0320.vs.Ctr | U937.FDR.BRD0320.vs.Ctr | U937.BRD0705.vs.Ctr | U937.BRD0320.vs.Ctr | U937.BRD3731.vs.Ctr |
|-----|--------|--------------|----------------------|--------------------------|----------------------------|-------------------------|----------------------------|-------------------------|---------------------|---------------------|---------------------|
| 946 | 9148   | APBA2        | 3.47                 | 2.96                     | -0.51                      | -10.51                  | 0.00                       | 0.01                    | 0                   | DN                  | 0                   |
| 947 | 7551   | TRIM13       | 4.22                 | 3.72                     | -0.51                      | -2.83                   | 0.00                       | 0.00                    | 0                   | DN                  | 0                   |
| 948 | 7330   | BC043582     | 2.69                 | 2.18                     | -0.51                      | -17.32                  | 0.00                       | 0.01                    | 0                   | DN                  | 0                   |
| 949 | 6608   | PRIM1        | 4.45                 | 3.95                     | -0.51                      | -3.40                   | 0.01                       | 0.00                    | 0                   | DN                  | 0                   |
| 950 | 6531   | ITGA5        | 6.70                 | 6.19                     | -0.51                      | -7.91                   | 0.01                       | 0.00                    | 0                   | DN                  | 0                   |
| 951 | 5714   | PVRL1        | 3.75                 | 3.24                     | -0.51                      | -4.45                   | 0.01                       | 0.00                    | 0                   | DN                  | 0                   |
| 952 | 3858   | MXI1         | 3.89                 | 3.38                     | -0.51                      | -6.69                   | 0.01                       | 0.00                    | 0                   | DN                  | 0                   |
| 953 | 2959   | UPF2         | 3.87                 | 3.37                     | -0.51                      | -2.97                   | 0.01                       | 0.00                    | 0                   | DN                  | DN                  |
| 954 | 2754   | MTR          | 3.71                 | 3.20                     | -0.51                      | -3.97                   | 0.00                       | 0.01                    | 0                   | DN                  | 0                   |
| 955 | 2544   | SMYD2        | 4.66                 | 4.15                     | -0.51                      | -3.87                   | 0.01                       | 0.00                    | 0                   | DN                  | 0                   |
| 956 | 582    | CCDC28B      | 4.25                 | 3.73                     | -0.51                      | -1.68                   | 0.01                       | 0.01                    | 0                   | DN                  | 0                   |
| 957 | 29776  | PTCH1        | 1.95                 | 1.45                     | -0.50                      | -1.40                   | 0.01                       | 0.01                    | 0                   | DN                  | 0                   |
| 958 | 28816  | ENY2         | 4.94                 | 4.44                     | -0.50                      | -3.39                   | 0.01                       | 0.00                    | 0                   | DN                  | 0                   |
| 959 | 28689  | DECR1        | 4.86                 | 4.36                     | -0.50                      | -3.85                   | 0.00                       | 0.01                    | 0                   | DN                  | 0                   |
| 960 | 23747  | JARID2       | 4.26                 | 3.76                     | -0.50                      | -5.07                   | 0.01                       | 0.01                    | 0                   | DN                  | 0                   |
| 961 | 22870  | RASA1        | 3.81                 | 3.31                     | -0.50                      | -8.61                   | 0.01                       | 0.01                    | 0                   | DN                  | 0                   |
| 962 | 21660  | CENPC1       | 3.44                 | 2.93                     | -0.50                      | -8.08                   | 0.00                       | 0.01                    | 0                   | DN                  | 0                   |
| 963 | 20371  | EIF4E3       | 4.33                 | 3.83                     | -0.50                      | -4.42                   | 0.00                       | 0.00                    | 0                   | DN                  | 0                   |
| 964 | 18673  | C21orf91-OT1 | 2.61                 | 2.11                     | -0.50                      | -2.30                   | 0.00                       | 0.00                    | 0                   | DN                  | 0                   |
| 965 | 16712  | CNNM3        | 3.28                 | 2.78                     | -0.50                      | -5.36                   | 0.01                       | 0.00                    | 0                   | DN                  | 0                   |
| 966 | 16188  | YPEL5        | 3.13                 | 2.63                     | -0.50                      | -2.83                   | 0.00                       | 0.00                    | 0                   | DN                  | 0                   |
| 967 | 13989  | NEDD4L       | 2.58                 | 2.08                     | -0.50                      | -1.36                   | 0.01                       | 0.01                    | 0                   | DN                  | 0                   |
| 968 | 11539  | HSF4         | 1.46                 | 0.96                     | -0.50                      | -0.87                   | 0.01                       | 0.00                    | 0                   | DN                  | 0                   |
| 969 | 8093   | CTSG         | 10.44                | 9.94                     | -0.50                      | -9.61                   | 0.00                       | 0.00                    | 0                   | DN                  | 0                   |
| 970 | 6281   | FGD4         | 2.13                 | 1.62                     | -0.50                      | -7.77                   | 0.00                       | 0.00                    | 0                   | DN                  | 0                   |
| 971 | 3403   | MCU          | 4.46                 | 3.96                     | -0.50                      | -4.72                   | 0.00                       | 0.01                    | 0                   | DN                  | 0                   |
| 972 | 3364   | LRRC20       | 3.19                 | 2.69                     | -0.50                      | -4.08                   | 0.01                       | 0.01                    | 0                   | DN                  | 0                   |
| 973 | 2337   | PTPRC        | 5.60                 | 5.09                     | -0.50                      | -8.53                   | 0.01                       | 0.00                    | 0                   | DN                  | 0                   |
| 974 | 2312   | RGS2         | 1.51                 | 1.00                     | -0.50                      | -2.00                   | 0.00                       | 0.01                    | 0                   | DN                  | 0                   |
| 975 | 932    | USP24        | 4.28                 | 3.77                     | -0.50                      | -3.12                   | 0.01                       | 0.00                    | 0                   | DN                  | 0                   |

**Genes with expression up-regulated by BRD0320 vs Control**

|   |       |         |      |      |      |       |      |      |    |    |    |
|---|-------|---------|------|------|------|-------|------|------|----|----|----|
| 1 | 19385 | HMOX1   | 2.36 | 6.00 | 3.65 | 18.56 | 0.00 | 0.00 | UP | UP | UP |
| 2 | 2049  | OLFML2B | 2.69 | 6.09 | 3.40 | 44.07 | 0.01 | 0.00 | UP | UP | UP |
| 3 | 17941 | SIGLEC1 | 0.69 | 4.03 | 3.33 | 53.15 | 0.01 | 0.01 | 0  | UP | 0  |
| 4 | 1970  | CD48    | 2.01 | 5.10 | 3.09 | 16.75 | 0.00 | 0.00 | UP | UP | UP |
| 5 | 15388 | C5AR1   | 1.08 | 4.11 | 3.03 | 24.45 | 0.00 | 0.01 | UP | UP | 0  |

| #  | GeneID | Gene Symbol      | U937.av.log2FPKM.Ctr | U937.av.log2FPKM.BRD0320 | <b>U937.log2FC.BRD0320.vs.Ctr</b> | U937.SNR.BRD0320.vs.Ctr | U937.Pvalue.BRD0320.vs.Ctr | U937.FDR.BRD0320.vs.Ctr | U937.BRD0705.vs.Ctr | <b>U937.BRD0320.vs.Ctr</b> | U937.BRD3731.vs.Ctr |
|----|--------|------------------|----------------------|--------------------------|-----------------------------------|-------------------------|----------------------------|-------------------------|---------------------|----------------------------|---------------------|
| 6  | 2475   | IL10             | 0.24                 | 3.21                     | 2.98                              | 17.62                   | 0.00                       | 0.00                    | 0                   | UP                         | 0                   |
| 7  | 28674  | ATP6V0D2         | 0.81                 | 3.73                     | 2.92                              | 13.20                   | 0.01                       | 0.01                    | 0                   | UP                         | 0                   |
| 8  | 6767   | PHLDA1           | 0.90                 | 3.61                     | 2.71                              | 17.67                   | 0.00                       | 0.00                    | 0                   | UP                         | 0                   |
| 9  | 18307  | MAFB             | 1.46                 | 4.14                     | 2.68                              | 16.29                   | 0.00                       | 0.00                    | UP                  | UP                         | 0                   |
| 10 | 13505  | SLC26A11         | 0.56                 | 3.18                     | 2.62                              | 19.95                   | 0.00                       | 0.00                    | UP                  | UP                         | 0                   |
| 11 | 24487  | CDKN1A           | 1.80                 | 4.32                     | 2.52                              | 9.67                    | 0.00                       | 0.00                    | UP                  | UP                         | 0                   |
| 12 | 1971   | SLAMF7           | 0.21                 | 2.66                     | 2.45                              | 8.18                    | 0.00                       | 0.01                    | UP                  | UP                         | 0                   |
| 13 | 12610  | CCL3             | 0.79                 | 3.22                     | 2.43                              | 8.33                    | 0.00                       | 0.01                    | UP                  | UP                         | 0                   |
| 14 | 21212  | TM4SF19-TCTEX1D2 | 1.21                 | 3.61                     | 2.40                              | 6.62                    | 0.01                       | 0.00                    | UP                  | UP                         | 0                   |
| 15 | 110    | TNFRSF14         | 2.85                 | 5.24                     | 2.39                              | 17.83                   | 0.00                       | 0.00                    | UP                  | UP                         | UP                  |
| 16 | 29194  | PLIN2            | 3.98                 | 6.26                     | 2.28                              | 12.25                   | 0.00                       | 0.01                    | 0                   | UP                         | UP                  |
| 17 | 16245  | GALM             | 0.48                 | 2.74                     | 2.26                              | 13.75                   | 0.01                       | 0.00                    | 0                   | UP                         | 0                   |
| 18 | 12567  | CCL2             | 5.33                 | 7.56                     | 2.24                              | 13.13                   | 0.00                       | 0.01                    | 0                   | UP                         | 0                   |
| 19 | 28651  | FABP4            | 2.15                 | 4.39                     | 2.24                              | 9.51                    | 0.01                       | 0.01                    | 0                   | UP                         | 0                   |
| 20 | 22785  | ENC1             | 1.48                 | 3.67                     | 2.19                              | 8.51                    | 0.00                       | 0.00                    | 0                   | UP                         | 0                   |
| 21 | 7062   | SDS              | 1.28                 | 3.47                     | 2.19                              | 11.94                   | 0.01                       | 0.01                    | 0                   | UP                         | UP                  |
| 22 | 950    | JUN              | 3.35                 | 5.51                     | 2.16                              | 45.21                   | 0.00                       | 0.00                    | UP                  | UP                         | UP                  |
| 23 | 22181  | TDO2             | 0.20                 | 2.33                     | 2.14                              | 13.09                   | 0.00                       | 0.01                    | 0                   | UP                         | UP                  |
| 24 | 12609  | CCL18            | 0.19                 | 2.30                     | 2.11                              | 4.39                    | 0.00                       | 0.00                    | 0                   | UP                         | 0                   |
| 25 | 20074  | CCR1             | 2.25                 | 4.33                     | 2.07                              | 10.77                   | 0.01                       | 0.00                    | 0                   | UP                         | 0                   |
| 26 | 16244  | HNRPLL           | 0.16                 | 2.18                     | 2.02                              | 12.47                   | 0.00                       | 0.00                    | 0                   | UP                         | 0                   |
| 27 | 6163   | EMP1             | 1.97                 | 3.94                     | 1.98                              | 8.08                    | 0.01                       | 0.00                    | 0                   | UP                         | 0                   |
| 28 | 2276   | NCF2             | 3.31                 | 5.24                     | 1.93                              | 13.80                   | 0.00                       | 0.01                    | UP                  | UP                         | UP                  |
| 29 | 5527   | MMP1             | 1.13                 | 3.01                     | 1.89                              | 8.15                    | 0.00                       | 0.01                    | 0                   | UP                         | 0                   |
| 30 | 108    | LOC100133445     | 0.84                 | 2.73                     | 1.89                              | 8.02                    | 0.01                       | 0.00                    | 0                   | UP                         | 0                   |
| 31 | 8033   | SLC7A8           | 1.97                 | 3.84                     | 1.87                              | 26.32                   | 0.01                       | 0.00                    | 0                   | UP                         | 0                   |
| 32 | 3385   | DDIT4            | 4.08                 | 5.93                     | 1.85                              | 7.94                    | 0.00                       | 0.00                    | UP                  | UP                         | 0                   |
| 33 | 6038   | C3AR1            | 1.64                 | 3.49                     | 1.85                              | 11.54                   | 0.01                       | 0.00                    | 0                   | UP                         | UP                  |
| 34 | 23363  | HAVCR2           | 1.31                 | 3.13                     | 1.82                              | 13.66                   | 0.01                       | 0.00                    | 0                   | UP                         | 0                   |
| 35 | 4144   | CTSD             | 10.08                | 11.89                    | 1.81                              | 36.39                   | 0.00                       | 0.00                    | UP                  | UP                         | UP                  |
| 36 | 29824  | TBC1D2           | 4.04                 | 5.82                     | 1.78                              | 31.01                   | 0.00                       | 0.01                    | UP                  | UP                         | UP                  |
| 37 | 12100  | CD68             | 5.84                 | 7.61                     | 1.77                              | 20.30                   | 0.01                       | 0.01                    | UP                  | UP                         | UP                  |
| 38 | 7050   | OAS1             | 1.46                 | 3.22                     | 1.76                              | 9.40                    | 0.00                       | 0.01                    | 0                   | UP                         | 0                   |
| 39 | 8379   | ZFP36L1          | 0.59                 | 2.34                     | 1.75                              | 10.01                   | 0.01                       | 0.01                    | 0                   | UP                         | 0                   |
| 40 | 7490   | LACC1            | 1.90                 | 3.63                     | 1.73                              | 35.05                   | 0.00                       | 0.01                    | 0                   | UP                         | DN                  |
| 41 | 24150  | IER3             | 0.60                 | 2.31                     | 1.71                              | 4.60                    | 0.01                       | 0.01                    | 0                   | UP                         | 0                   |
| 42 | 4920   | MS4A4A           | 3.19                 | 4.87                     | 1.68                              | 13.32                   | 0.01                       | 0.00                    | 0                   | UP                         | UP                  |

| #  | GeneID | Gene Symbol | U937.av.log2FPKM.Ctr | U937.av.log2FPKM.BRD0320 | <b>U937.log2FC.BRD0320.vs.Ctr</b> | U937.SNR.BRD0320.vs.Ctr | U937.Pvalue.BRD0320.vs.Ctr | U937.FDR.BRD0320.vs.Ctr | U937.BRD0705.vs.Ctr | <b>U937.BRD0320.vs.Ctr</b> | U937.BRD3731.vs.Ctr |
|----|--------|-------------|----------------------|--------------------------|-----------------------------------|-------------------------|----------------------------|-------------------------|---------------------|----------------------------|---------------------|
| 43 | 11180  | NUPR1       | 0.85                 | 2.53                     | 1.67                              | 3.06                    | 0.00                       | 0.00                    | 0                   | UP                         | 0                   |
| 44 | 27690  | KCP         | 1.71                 | 3.38                     | 1.67                              | 3.82                    | 0.00                       | 0.00                    | 0                   | UP                         | 0                   |
| 45 | 5761   | VWA5A       | 2.30                 | 3.93                     | 1.64                              | 8.81                    | 0.01                       | 0.01                    | 0                   | UP                         | 0                   |
| 46 | 28240  | MTUS1       | 0.64                 | 2.28                     | 1.64                              | 23.45                   | 0.00                       | 0.01                    | 0                   | UP                         | 0                   |
| 47 | 14026  | SERPIN2     | 6.79                 | 8.43                     | 1.64                              | 11.71                   | 0.01                       | 0.01                    | 0                   | UP                         | DN                  |
| 48 | 25096  | SGK1        | 2.38                 | 4.00                     | 1.62                              | 10.39                   | 0.01                       | 0.00                    | 0                   | UP                         | 0                   |
| 49 | 576    | BC069257    | 1.01                 | 2.60                     | 1.59                              | 5.16                    | 0.01                       | 0.01                    | 0                   | UP                         | 0                   |
| 50 | 8015   | SLC7A7      | 2.03                 | 3.57                     | 1.54                              | 17.76                   | 0.01                       | 0.01                    | 0                   | UP                         | UP                  |
| 51 | 22065  | SLC7A11     | 1.81                 | 3.35                     | 1.54                              | 19.60                   | 0.01                       | 0.00                    | 0                   | UP                         | 0                   |
| 52 | 28615  | LY96        | 1.66                 | 3.19                     | 1.53                              | 3.87                    | 0.00                       | 0.01                    | UP                  | UP                         | UP                  |
| 53 | 15542  | IL4I1       | 0.81                 | 2.33                     | 1.52                              | 8.90                    | 0.01                       | 0.01                    | 0                   | UP                         | UP                  |
| 54 | 11197  | LAT         | 3.73                 | 5.26                     | 1.52                              | 18.25                   | 0.01                       | 0.00                    | 0                   | UP                         | 0                   |
| 55 | 434    | FUCA1       | 5.32                 | 6.82                     | 1.51                              | 13.08                   | 0.00                       | 0.00                    | 0                   | UP                         | DN                  |
| 56 | 24218  | NEU1        | 5.51                 | 7                        | 1.48                              | 23.34                   | 0.01                       | 0.01                    | UP                  | UP                         | UP                  |
| 57 | 16798  | SULT1C2     | 0.47                 | 1.94                     | 1.48                              | 4.576                   | 0                          | 0                       | 0                   | UP                         | 0                   |
| 58 | 14723  | IFI30       | 7.07                 | 8.54                     | 1.47                              | 12.36                   | 0.01                       | 0                       | UP                  | UP                         | UP                  |
| 59 | 22697  | CD180       | 2.87                 | 4.34                     | 1.47                              | 12.14                   | 0.01                       | 0.01                    | 0                   | UP                         | UP                  |
| 60 | 16918  | MARCO       | 2.84                 | 4.29                     | 1.45                              | 7.805                   | 0.01                       | 0.01                    | UP                  | UP                         | UP                  |
| 61 | 12568  | CCL7        | 0.54                 | 2                        | 1.45                              | 6.134                   | 0                          | 0.01                    | 0                   | UP                         | 0                   |
| 62 | 9980   | CYP1A1      | 1.28                 | 2.72                     | 1.44                              | 4.235                   | 0.01                       | 0                       | 0                   | UP                         | DN                  |
| 63 | 14973  | CD22        | 1.02                 | 2.45                     | 1.43                              | 4.903                   | 0                          | 0.01                    | 0                   | UP                         | 0                   |
| 64 | 11746  | OSGIN1      | 1.79                 | 3.21                     | 1.42                              | 11.55                   | 0                          | 0.01                    | UP                  | UP                         | 0                   |
| 65 | 23317  | SMIM3       | 3.91                 | 5.32                     | 1.41                              | 3.117                   | 0.01                       | 0.01                    | 0                   | UP                         | 0                   |
| 66 | 14732  | GDF15       | 0.08                 | 1.49                     | 1.41                              | 13.05                   | 0.01                       | 0                       | 0                   | UP                         | 0                   |
| 67 | 831    | DMBX1       | 0.23                 | 1.63                     | 1.41                              | 11.34                   | 0                          | 0.01                    | 0                   | UP                         | 0                   |
| 68 | 24621  | SPATS1      | 0.03                 | 1.43                     | 1.4                               | 5.401                   | 0                          | 0.01                    | 0                   | UP                         | 0                   |
| 69 | 8872   | TDRD9       | 1.03                 | 2.42                     | 1.39                              | 7.162                   | 0                          | 0.01                    | 0                   | UP                         | 0                   |
| 70 | 10794  | AMDHD2      | 2.9                  | 4.29                     | 1.38                              | 7.053                   | 0.01                       | 0                       | UP                  | UP                         | 0                   |
| 71 | 26981  | UPP1        | 3.08                 | 4.43                     | 1.35                              | 11.11                   | 0                          | 0                       | 0                   | UP                         | 0                   |
| 72 | 28845  | NOV         | 4.4                  | 5.74                     | 1.34                              | 28.5                    | 0                          | 0                       | 0                   | UP                         | UP                  |
| 73 | 4172   | SLC22A18AS  | 0.94                 | 2.28                     | 1.34                              | 13.29                   | 0.01                       | 0.01                    | 0                   | UP                         | UP                  |
| 74 | 20247  | STAB1       | 0.11                 | 1.43                     | 1.32                              | 12.83                   | 0.01                       | 0                       | 0                   | UP                         | 0                   |
| 75 | 3438   | PLAU        | 4.14                 | 5.45                     | 1.3                               | 11.52                   | 0                          | 0                       | UP                  | UP                         | UP                  |
| 76 | 28481  | ATP6V1H     | 5.13                 | 6.43                     | 1.3                               | 10.07                   | 0                          | 0.01                    | 0                   | UP                         | UP                  |
| 77 | 13540  | TSPAN10     | 2.41                 | 3.7                      | 1.29                              | 3.438                   | 0                          | 0.01                    | UP                  | UP                         | UP                  |
| 78 | 1990   | FCER1G      | 6.78                 | 8.04                     | 1.26                              | 16.47                   | 0.01                       | 0.01                    | UP                  | UP                         | 0                   |
| 79 | 17122  | ZEB2_AS1_1  | 0.2                  | 1.46                     | 1.25                              | 1.565                   | 0                          | 0.01                    | 0                   | UP                         | 0                   |

| #   | GeneID | Gene Symbol | U937.av.log2FPKM.Ctr | U937.av.log2FPKM.BRD0320 | <b>U937.log2FC.BRD0320.vs.Ctr</b> | U937.SNR.BRD0320.vs.Ctr | U937.Pvalue.BRD0320.vs.Ctr | U937.FDR.BRD0320.vs.Ctr | U937.BRD0705.vs.Ctr | <b>U937.BRD0320.vs.Ctr</b> | U937.BRD3731.vs.Ctr |
|-----|--------|-------------|----------------------|--------------------------|-----------------------------------|-------------------------|----------------------------|-------------------------|---------------------|----------------------------|---------------------|
| 80  | 18447  | AK307192    | 0.99                 | 2.24                     | 1.24                              | 3.773                   | 0.01                       | 0                       | 0                   | UP                         | 0                   |
| 81  | 14693  | ABHD8       | 2.61                 | 3.84                     | 1.23                              | 9.653                   | 0                          | 0                       | UP                  | UP                         | 0                   |
| 82  | 27120  | TPST1       | 2.38                 | 3.61                     | 1.23                              | 9.625                   | 0                          | 0.01                    | 0                   | UP                         | UP                  |
| 83  | 17769  | ARL4C       | 0.67                 | 1.89                     | 1.23                              | 5.181                   | 0.01                       | 0.01                    | 0                   | UP                         | 0                   |
| 84  | 16171  | FOSL2       | 3.6                  | 4.82                     | 1.22                              | 18.68                   | 0                          | 0.01                    | 0                   | UP                         | 0                   |
| 85  | 15997  | ID2         | 5.19                 | 6.4                      | 1.21                              | 7.691                   | 0                          | 0                       | UP                  | UP                         | 0                   |
| 86  | 14264  | SEMA6B      | 3.12                 | 4.32                     | 1.2                               | 12.02                   | 0.01                       | 0.01                    | 0                   | UP                         | DN                  |
| 87  | 15292  | BCL3        | 1.46                 | 2.66                     | 1.2                               | 9.981                   | 0                          | 0.01                    | 0                   | UP                         | 0                   |
| 88  | 22529  | IL7R        | 0.72                 | 1.92                     | 1.2                               | 7.166                   | 0.01                       | 0                       | 0                   | UP                         | 0                   |
| 89  | 31616  | MIR718      | 1                    | 2.2                      | 1.2                               | 0.919                   | 0                          | 0.01                    | 0                   | UP                         | 0                   |
| 90  | 20249  | SMIM4       | 5.24                 | 6.42                     | 1.19                              | 5.892                   | 0.01                       | 0                       | 0                   | UP                         | 0                   |
| 91  | 8472   | JDP2        | 3.43                 | 4.62                     | 1.19                              | 10.89                   | 0                          | 0.01                    | 0                   | UP                         | 0                   |
| 92  | 5523   | MMP8        | 0.2                  | 1.39                     | 1.19                              | 8.013                   | 0.01                       | 0                       | 0                   | UP                         | 0                   |
| 93  | 3253   | BC039561    | 1.87                 | 3.05                     | 1.18                              | 1.746                   | 0                          | 0.01                    | 0                   | UP                         | 0                   |
| 94  | 6335   | SLC48A1     | 2.89                 | 4.07                     | 1.18                              | 6.588                   | 0.01                       | 0                       | 0                   | UP                         | 0                   |
| 95  | 28959  | ST3GAL1     | 3.92                 | 5.09                     | 1.17                              | 15.06                   | 0                          | 0                       | UP                  | UP                         | UP                  |
| 96  | 14539  | DNASE2      | 5.22                 | 6.39                     | 1.17                              | 19.18                   | 0.01                       | 0.01                    | 0                   | UP                         | UP                  |
| 97  | 5371   | MYO7A       | 3.6                  | 4.77                     | 1.17                              | 8.76                    | 0                          | 0.01                    | 0                   | UP                         | 0                   |
| 98  | 182    | SPSB1       | 1.54                 | 2.71                     | 1.17                              | 7.875                   | 0                          | 0                       | 0                   | UP                         | 0                   |
| 99  | 28190  | CTSB        | 6.97                 | 8.14                     | 1.17                              | 13.46                   | 0                          | 0.01                    | 0                   | UP                         | 0                   |
| 100 | 540    | RAB42       | 0.08                 | 1.24                     | 1.17                              | 3.406                   | 0.01                       | 0                       | 0                   | UP                         | 0                   |
| 101 | 15468  | FTL         | 11.62                | 12.77                    | 1.15                              | 17.16                   | 0                          | 0.01                    | 0                   | UP                         | 0                   |
| 102 | 9376   | CHAC1       | 1.08                 | 2.22                     | 1.15                              | 3.977                   | 0                          | 0.01                    | 0                   | UP                         | 0                   |
| 103 | 6634   | DDIT3       | 3.21                 | 4.36                     | 1.15                              | 3.46                    | 0.01                       | 0.01                    | 0                   | UP                         | UP                  |
| 104 | 2278   | RGL1        | 0.42                 | 1.56                     | 1.15                              | 6.948                   | 0                          | 0                       | 0                   | UP                         | 0                   |
| 105 | 3070   | APBB1IP     | 4.15                 | 5.27                     | 1.13                              | 9.877                   | 0.01                       | 0                       | 0                   | UP                         | 0                   |
| 106 | 5551   | GUCY1A2     | 0.64                 | 1.77                     | 1.13                              | 11.9                    | 0                          | 0.01                    | 0                   | UP                         | 0                   |
| 107 | 28785  | KLF10       | 2.84                 | 3.96                     | 1.12                              | 6.841                   | 0                          | 0.01                    | UP                  | UP                         | 0                   |
| 108 | 1755   | S100A2      | 0.85                 | 1.97                     | 1.12                              | 4.675                   | 0.01                       | 0.01                    | 0                   | UP                         | 0                   |
| 109 | 31609  | RENBP       | 5.22                 | 6.33                     | 1.11                              | 5.938                   | 0                          | 0.01                    | 0                   | UP                         | UP                  |
| 110 | 2260   | GLUL        | 7.29                 | 8.4                      | 1.11                              | 24.63                   | 0.01                       | 0.01                    | 0                   | UP                         | UP                  |
| 111 | 6162   | GSG1        | 2.36                 | 3.47                     | 1.11                              | 3.36                    | 0.01                       | 0                       | 0                   | UP                         | 0                   |
| 112 | 9838   | PLEKHO2     | 3.31                 | 4.41                     | 1.1                               | 13.43                   | 0.01                       | 0.01                    | 0                   | UP                         | 0                   |
| 113 | 26742  | GPNMB       | 7.56                 | 8.64                     | 1.09                              | 12.75                   | 0                          | 0                       | 0                   | UP                         | UP                  |
| 114 | 1543   | AK023809    | 1.57                 | 2.66                     | 1.09                              | 2.808                   | 0.01                       | 0.01                    | 0                   | UP                         | 0                   |
| 115 | 8607   | GPR68       | 0.76                 | 1.86                     | 1.09                              | 3.637                   | 0.01                       | 0                       | 0                   | UP                         | DN                  |
| 116 | 19815  | PPARG       | 3.91                 | 4.99                     | 1.09                              | 26.97                   | 0                          | 0.01                    | 0                   | UP                         | 0                   |

| #   | GeneID | Gene Symbol | U937.av.log2FPKM.Ctr | U937.av.log2FPKM.BRD0320 | U937.log2FC.BRD0320.vs.Ctr | U937.SNR.BRD0320.vs.Ctr | U937.Pvalue.BRD0320.vs.Ctr | U937.FDR.BRD0320.vs.Ctr | U937.BRD0705.vs.Ctr | U937.BRD0320.vs.Ctr | U937.BRD3731.vs.Ctr |
|-----|--------|-------------|----------------------|--------------------------|----------------------------|-------------------------|----------------------------|-------------------------|---------------------|---------------------|---------------------|
| 117 | 9652   | AQP9        | 0.23                 | 1.32                     | 1.09                       | 10.51                   | 0                          | 0                       | 0                   | UP                  | 0                   |
| 118 | 30933  | AY927613    | 1.77                 | 2.86                     | 1.09                       | 1.087                   | 0.01                       | 0                       | 0                   | UP                  | 0                   |
| 119 | 13517  | BAIAP2      | 2.02                 | 3.1                      | 1.08                       | 8.119                   | 0                          | 0.01                    | 0                   | UP                  | 0                   |
| 120 | 20248  | NT5DC2      | 4.72                 | 5.81                     | 1.08                       | 10.57                   | 0.01                       | 0.01                    | 0                   | UP                  | 0                   |
| 121 | 7063   | SDSL        | 2.43                 | 3.51                     | 1.08                       | 5.093                   | 0                          | 0                       | 0                   | UP                  | UP                  |
| 122 | 28846  | ENPP2       | 0.33                 | 1.41                     | 1.08                       | 5.195                   | 0.01                       | 0                       | 0                   | UP                  | 0                   |
| 123 | 17700  | SP140       | 0.52                 | 1.6                      | 1.08                       | 6.833                   | 0.01                       | 0                       | 0                   | UP                  | 0                   |
| 124 | 5659   | FXYD2       | 2.04                 | 3.1                      | 1.07                       | 5.862                   | 0                          | 0                       | 0                   | UP                  | 0                   |
| 125 | 24902  | PRDM1       | 0.61                 | 1.69                     | 1.07                       | 6.881                   | 0                          | 0.01                    | 0                   | UP                  | 0                   |
| 126 | 21203  | TFRC        | 5.67                 | 6.73                     | 1.06                       | 16.02                   | 0                          | 0.01                    | UP                  | UP                  | UP                  |
| 127 | 28392  | ZNF703      | 4.02                 | 5.09                     | 1.06                       | 9.479                   | 0                          | 0.01                    | 0                   | UP                  | 0                   |
| 128 | 3524   | ZMIZ1-AS1   | 1.86                 | 2.93                     | 1.06                       | 4.159                   | 0                          | 0.01                    | 0                   | UP                  | 0                   |
| 129 | 2800   | SMYD3       | 5.13                 | 6.2                      | 1.06                       | 14.52                   | 0.01                       | 0.01                    | 0                   | UP                  | 0                   |
| 130 | 10094  | BCL2A1      | 5.39                 | 6.44                     | 1.05                       | 6.684                   | 0                          | 0                       | 0                   | UP                  | 0                   |
| 131 | 18575  | BIRC7       | 1.01                 | 2.03                     | 1.03                       | 2.834                   | 0.01                       | 0                       | 0                   | UP                  | UP                  |
| 132 | 17404  | NABP1       | 3.57                 | 4.6                      | 1.03                       | 5.531                   | 0.01                       | 0.01                    | 0                   | UP                  | 0                   |
| 133 | 15460  | PPP1R15A    | 4.43                 | 5.46                     | 1.03                       | 11.31                   | 0                          | 0                       | 0                   | UP                  | 0                   |
| 134 | 16964  | HS6ST1      | 4.94                 | 5.96                     | 1.02                       | 14.3                    | 0                          | 0                       | 0                   | UP                  | 0                   |
| 135 | 3725   | GOLGA7B     | 2.05                 | 3.07                     | 1.02                       | 5.429                   | 0                          | 0.01                    | 0                   | UP                  | 0                   |
| 136 | 22198  | FNIP2       | 3                    | 4.02                     | 1.02                       | 11.22                   | 0                          | 0.01                    | 0                   | UP                  | 0                   |
| 137 | 15545  | ATF5        | 4.61                 | 5.63                     | 1.01                       | 11.71                   | 0                          | 0                       | 0                   | UP                  | 0                   |
| 138 | 11559  | ATP6V0D1    | 4.93                 | 5.94                     | 1.01                       | 13.84                   | 0.01                       | 0                       | 0                   | UP                  | 0                   |
| 139 | 25169  | STX11       | 2.3                  | 3.31                     | 1.01                       | 2.26                    | 0                          | 0.01                    | 0                   | UP                  | 0                   |
| 140 | 14261  | PLIN4       | 0.59                 | 1.6                      | 1.01                       | 5.119                   | 0                          | 0                       | 0                   | UP                  | 0                   |
| 141 | 4873   | LPXN        | 6.73                 | 7.74                     | 1.01                       | 16.75                   | 0                          | 0.01                    | 0                   | UP                  | 0                   |
| 142 | 8632   | TMEM251     | 4.44                 | 5.45                     | 1.01                       | 5.163                   | 0                          | 0                       | 0                   | UP                  | UP                  |
| 143 | 938    | PPAP2B      | 0.78                 | 1.78                     | 1.01                       | 4.262                   | 0.01                       | 0                       | 0                   | UP                  | UP                  |
| 144 | 4567   | CD82        | 5.35                 | 6.36                     | 1                          | 7.514                   | 0.01                       | 0.01                    | UP                  | UP                  | UP                  |
| 145 | 532    | SESN2       | 2.78                 | 3.77                     | 1                          | 12.26                   | 0.01                       | 0.01                    | 0                   | UP                  | 0                   |
| 146 | 23326  | GM2A        | 5.52                 | 6.51                     | 1                          | 9.2                     | 0                          | 0                       | 0                   | UP                  | UP                  |
| 147 | 4939   | SLC15A3     | 1.8                  | 2.8                      | 0.99                       | 5.812                   | 0.01                       | 0.01                    | 0                   | UP                  | 0                   |
| 148 | 27124  | KCTD7       | 2.52                 | 3.52                     | 0.99                       | 6.805                   | 0                          | 0.01                    | 0                   | UP                  | UP                  |
| 149 | 3128   | CREM        | 3.2                  | 4.18                     | 0.98                       | 5.031                   | 0.01                       | 0.01                    | 0                   | UP                  | 0                   |
| 150 | 7051   | OAS3        | 3.14                 | 4.12                     | 0.98                       | 12.04                   | 0.01                       | 0                       | 0                   | UP                  | 0                   |
| 151 | 2620   | CNIH3       | 2.12                 | 3.1                      | 0.98                       | 6.841                   | 0                          | 0.01                    | 0                   | UP                  | 0                   |
| 152 | 23459  | SH3PXD2B    | 1.12                 | 2.1                      | 0.98                       | 6.413                   | 0.01                       | 0.01                    | 0                   | UP                  | 0                   |
| 153 | 6025   | CD163       | 0.06                 | 1.03                     | 0.97                       | 10.99                   | 0.01                       | 0.01                    | 0                   | UP                  | 0                   |



| #   | GeneID | Gene Symbol | U937.av.log2FPKM.Ctr | U937.av.log2FPKM.BRD0320 | <b>U937.log2FC.BRD0320.vs.Ctr</b> | U937.SNR.BRD0320.vs.Ctr | U937.Pvalue.BRD0320.vs.Ctr | U937.FDR.BRD0320.vs.Ctr | U937.BRD0705.vs.Ctr | <b>U937.BRD0320.vs.Ctr</b> | U937.BRD3731.vs.Ctr |
|-----|--------|-------------|----------------------|--------------------------|-----------------------------------|-------------------------|----------------------------|-------------------------|---------------------|----------------------------|---------------------|
| 154 | 432    | GALE        | 5.44                 | 6.39                     | 0.96                              | 13.61                   | 0.01                       | 0.01                    | 0                   | UP                         | UP                  |
| 155 | 11196  | SPNS1       | 4.56                 | 5.52                     | 0.96                              | 9.727                   | 0                          | 0                       | 0                   | UP                         | 0                   |
| 156 | 2529   | ATF3        | 1.12                 | 2.08                     | 0.96                              | 4.388                   | 0.01                       | 0                       | 0                   | UP                         | 0                   |
| 157 | 15458  | HSD17B14    | 1.17                 | 2.12                     | 0.96                              | 3.037                   | 0.01                       | 0.01                    | 0                   | UP                         | UP                  |
| 158 | 8312   | SLC38A6     | 2.13                 | 3.09                     | 0.96                              | 14.31                   | 0                          | 0.01                    | 0                   | UP                         | 0                   |
| 159 | 18085  | THBD        | 2.92                 | 3.86                     | 0.95                              | 8.024                   | 0.01                       | 0.01                    | 0                   | UP                         | 0                   |
| 160 | 11483  | KIFC3       | 1.86                 | 2.81                     | 0.95                              | 3.578                   | 0                          | 0.01                    | 0                   | UP                         | 0                   |
| 161 | 23175  | CYSTM1      | 3.42                 | 4.37                     | 0.95                              | 9.195                   | 0                          | 0.01                    | 0                   | UP                         | 0                   |
| 162 | 1208   | FRRS1       | 1.46                 | 2.4                      | 0.95                              | 10.51                   | 0                          | 0                       | 0                   | UP                         | UP                  |
| 163 | 1852   | LMNA        | 6.39                 | 7.33                     | 0.94                              | 20.33                   | 0.01                       | 0.01                    | 0                   | UP                         | 0                   |
| 164 | 12228  | TRIM16      | 2.79                 | 3.73                     | 0.94                              | 6.885                   | 0                          | 0                       | 0                   | UP                         | 0                   |
| 165 | 13809  | NPC1        | 6.07                 | 7.01                     | 0.94                              | 15.64                   | 0.01                       | 0.01                    | 0                   | UP                         | UP                  |
| 166 | 4173   | SLC22A18    | 3.4                  | 4.33                     | 0.93                              | 4.422                   | 0                          | 0.01                    | UP                  | UP                         | 0                   |
| 167 | 29745  | NINJ1       | 3.64                 | 4.57                     | 0.93                              | 6.999                   | 0.01                       | 0                       | 0                   | UP                         | 0                   |
| 168 | 18116  | ABHD12      | 5.7                  | 6.63                     | 0.93                              | 12.7                    | 0                          | 0.01                    | 0                   | UP                         | 0                   |
| 169 | 7297   | GJB2        | 4.26                 | 5.18                     | 0.92                              | 6.224                   | 0                          | 0.01                    | UP                  | UP                         | UP                  |
| 170 | 16119  | SLC35F6     | 3.76                 | 4.67                     | 0.92                              | 10.66                   | 0.01                       | 0                       | 0                   | UP                         | 0                   |
| 171 | 6562   | CD63        | 7.79                 | 8.7                      | 0.91                              | 9.935                   | 0                          | 0.01                    | 0                   | UP                         | UP                  |
| 172 | 15760  | OSCAR       | 3.26                 | 4.17                     | 0.91                              | 3.995                   | 0                          | 0.01                    | 0                   | UP                         | 0                   |
| 173 | 22235  | PALLD       | 2.17                 | 3.08                     | 0.91                              | 9.439                   | 0.01                       | 0                       | 0                   | UP                         | 0                   |
| 174 | 23285  | ABLIM3      | 0.32                 | 1.23                     | 0.91                              | 4.631                   | 0.01                       | 0.01                    | 0                   | UP                         | 0                   |
| 175 | 18396  | CTSA        | 6.46                 | 7.36                     | 0.9                               | 19.08                   | 0.01                       | 0                       | 0                   | UP                         | 0                   |
| 176 | 24916  | OSTM1       | 2.98                 | 3.88                     | 0.9                               | 14.56                   | 0.01                       | 0                       | 0                   | UP                         | 0                   |
| 177 | 22191  | TMEM144     | 1.41                 | 2.31                     | 0.9                               | 4.964                   | 0                          | 0.01                    | 0                   | UP                         | 0                   |
| 178 | 24221  | C2          | 3.62                 | 4.52                     | 0.9                               | 11.28                   | 0.01                       | 0                       | 0                   | UP                         | 0                   |
| 179 | 11908  | MIR22HG     | 0.61                 | 1.51                     | 0.9                               | 1.619                   | 0.01                       | 0                       | 0                   | UP                         | 0                   |
| 180 | 30468  | SLC25A6     | 6.82                 | 7.7                      | 0.89                              | 19.02                   | 0                          | 0                       | 0                   | UP                         | 0                   |
| 181 | 27374  | BRI3        | 7.1                  | 7.98                     | 0.89                              | 18.02                   | 0                          | 0.01                    | 0                   | UP                         | UP                  |
| 182 | 19383  | TOM1        | 3.53                 | 4.42                     | 0.88                              | 6.032                   | 0                          | 0                       | 0                   | UP                         | UP                  |
| 183 | 28243  | ASAH1       | 7.37                 | 8.25                     | 0.88                              | 8.701                   | 0                          | 0.01                    | 0                   | UP                         | UP                  |
| 184 | 17957  | SMOX        | 3.65                 | 4.53                     | 0.88                              | 6.379                   | 0                          | 0.01                    | 0                   | UP                         | 0                   |
| 185 | 15770  | LILRB3      | 1.51                 | 2.4                      | 0.88                              | 5.395                   | 0                          | 0                       | 0                   | UP                         | 0                   |
| 186 | 8032   | CEBPE       | 3.53                 | 4.41                     | 0.87                              | 9.643                   | 0                          | 0                       | 0                   | UP                         | 0                   |
| 187 | 27559  | SnoU109     | 0.3                  | 1.18                     | 0.87                              | 1.544                   | 0                          | 0                       | 0                   | UP                         | 0                   |
| 188 | 28850  | COL14A1     | 0.39                 | 1.26                     | 0.87                              | 4.501                   | 0.01                       | 0.01                    | 0                   | UP                         | 0                   |
| 189 | 10721  | TPSAB1      | 8.2                  | 9.06                     | 0.86                              | 33.74                   | 0.01                       | 0                       | 0                   | UP                         | 0                   |
| 190 | 27229  | CCL26       | 0.73                 | 1.58                     | 0.86                              | 1.824                   | 0                          | 0.01                    | 0                   | UP                         | 0                   |

| #   | GeneID | Gene Symbol  | U937.av.log2FPKM.Ctr | U937.av.log2FPKM.BRD0320 | <b>U937.log2FC.BRD0320.vs.Ctr</b> | U937.SNR.BRD0320.vs.Ctr | U937.Pvalue.BRD0320.vs.Ctr | U937.FDR.BRD0320.vs.Ctr | U937.BRD0705.vs.Ctr | <b>U937.BRD0320.vs.Ctr</b> | U937.BRD3731.vs.Ctr |
|-----|--------|--------------|----------------------|--------------------------|-----------------------------------|-------------------------|----------------------------|-------------------------|---------------------|----------------------------|---------------------|
| 191 | 21840  | SPP1         | 0.22                 | 1.08                     | 0.86                              | 3.75                    | 0                          | 0.01                    | 0                   | UP                         | 0                   |
| 192 | 5057   | ESRRA        | 4.42                 | 5.27                     | 0.85                              | 6.335                   | 0                          | 0.01                    | 0                   | UP                         | UP                  |
| 193 | 538    | SNHG12       | 4.67                 | 5.53                     | 0.85                              | 2.305                   | 0.01                       | 0                       | 0                   | UP                         | UP                  |
| 194 | 3006   | VIM          | 7.82                 | 8.68                     | 0.85                              | 16.57                   | 0.01                       | 0.01                    | 0                   | UP                         | 0                   |
| 195 | 21814  | AGPAT9       | 1.49                 | 2.34                     | 0.85                              | 4.879                   | 0.01                       | 0                       | 0                   | UP                         | 0                   |
| 196 | 6157   | HEBP1        | 4.74                 | 5.59                     | 0.85                              | 5.78                    | 0.01                       | 0.01                    | 0                   | UP                         | 0                   |
| 197 | 2501   | LAMB3        | 1.28                 | 2.13                     | 0.85                              | 5.346                   | 0                          | 0                       | 0                   | UP                         | 0                   |
| 198 | 15304  | ZNF296       | 2.91                 | 3.75                     | 0.84                              | 13.25                   | 0                          | 0.01                    | UP                  | UP                         | 0                   |
| 199 | 4974   | FTH1         | 7.64                 | 8.48                     | 0.84                              | 9.027                   | 0                          | 0                       | 0                   | UP                         | 0                   |
| 200 | 21301  | ZFYVE28      | 1.91                 | 2.75                     | 0.84                              | 7.213                   | 0.01                       | 0                       | 0                   | UP                         | 0                   |
| 201 | 29990  | TRAF1        | 0.49                 | 1.33                     | 0.84                              | 5.401                   | 0.01                       | 0                       | 0                   | UP                         | 0                   |
| 202 | 18446  | CEBPB        | 5.08                 | 5.91                     | 0.83                              | 15.47                   | 0.01                       | 0.01                    | UP                  | UP                         | 0                   |
| 203 | 14345  | MCOLN1       | 2.74                 | 3.57                     | 0.83                              | 5.904                   | 0                          | 0                       | 0                   | UP                         | 0                   |
| 204 | 12067  | DVL2         | 3.72                 | 4.55                     | 0.83                              | 6.032                   | 0                          | 0                       | 0                   | UP                         | 0                   |
| 205 | 18369  | SDC4         | 3.57                 | 4.4                      | 0.83                              | 5.717                   | 0                          | 0                       | 0                   | UP                         | 0                   |
| 206 | 2378   | ARL8A        | 4.32                 | 5.15                     | 0.83                              | 10.95                   | 0                          | 0                       | 0                   | UP                         | 0                   |
| 207 | 2268   | NPL          | 2.32                 | 3.15                     | 0.83                              | 9.445                   | 0.01                       | 0.01                    | 0                   | UP                         | 0                   |
| 208 | 11857  | MC1R         | 3.42                 | 4.25                     | 0.83                              | 8.002                   | 0.01                       | 0.01                    | 0                   | UP                         | 0                   |
| 209 | 12220  | PMP22        | 0.23                 | 1.06                     | 0.83                              | 2.453                   | 0.01                       | 0                       | 0                   | UP                         | 0                   |
| 210 | 11283  | LOC100862671 | 0                    | 0.82                     | 0.82                              | 1.272                   | 0.01                       | 0.01                    | 0                   | UP                         | 0                   |
| 211 | 29744  | C9orf89      | 4.22                 | 5.04                     | 0.82                              | 6.663                   | 0                          | 0.01                    | 0                   | UP                         | 0                   |
| 212 | 16217  | RASGRP3      | 0.64                 | 1.46                     | 0.82                              | 13.97                   | 0                          | 0                       | 0                   | UP                         | 0                   |
| 213 | 28647  | PAG1         | 2.59                 | 3.42                     | 0.82                              | 13.71                   | 0                          | 0                       | 0                   | UP                         | 0                   |
| 214 | 27398  | CYP3A5       | 0.39                 | 1.21                     | 0.82                              | 3.795                   | 0                          | 0.01                    | 0                   | UP                         | 0                   |
| 215 | 11639  | VAC14        | 4.63                 | 5.44                     | 0.81                              | 5.817                   | 0.01                       | 0                       | 0                   | UP                         | 0                   |
| 216 | 5043   | FERMT3       | 6.45                 | 7.26                     | 0.8                               | 15.62                   | 0                          | 0                       | 0                   | UP                         | 0                   |
| 217 | 15751  | NLRP12       | 1                    | 1.8                      | 0.8                               | 3.564                   | 0                          | 0.01                    | 0                   | UP                         | 0                   |
| 218 | 10793  | ATP6V0C      | 6.99                 | 7.79                     | 0.8                               | 16.81                   | 0                          | 0.01                    | 0                   | UP                         | 0                   |
| 219 | 24932  | SMPD2        | 3.25                 | 4.04                     | 0.8                               | 4.56                    | 0                          | 0.01                    | 0                   | UP                         | 0                   |
| 220 | 22561  | PTGER4       | 2.86                 | 3.66                     | 0.8                               | 7.049                   | 0                          | 0                       | 0                   | UP                         | UP                  |
| 221 | 24848  | RRAGD        | 3.26                 | 4.06                     | 0.8                               | 11.42                   | 0.01                       | 0.01                    | 0                   | UP                         | UP                  |
| 222 | 7089   | WSB2         | 3.47                 | 4.26                     | 0.79                              | 5.049                   | 0                          | 0.01                    | 0                   | UP                         | 0                   |
| 223 | 21341  | EVC          | 0.05                 | 0.85                     | 0.79                              | 8.656                   | 0.01                       | 0                       | 0                   | UP                         | 0                   |
| 224 | 16461  | MXD1         | 1.92                 | 2.71                     | 0.79                              | 2.75                    | 0.01                       | 0                       | 0                   | UP                         | 0                   |
| 225 | 31633  | ATP6AP1      | 6.77                 | 7.55                     | 0.78                              | 14.5                    | 0                          | 0                       | 0                   | UP                         | 0                   |
| 226 | 27367  | ASNS         | 3.48                 | 4.26                     | 0.78                              | 5.06                    | 0.01                       | 0.01                    | 0                   | UP                         | 0                   |
| 227 | 4164   | CD81         | 0.98                 | 1.75                     | 0.78                              | 7.201                   | 0.01                       | 0                       | 0                   | UP                         | 0                   |

| #   | GeneID | Gene Symbol | U937.av.log2FPKM.Ctr | U937.av.log2FPKM.BRD0320 | U937.log2FC.BRD0320.vs.Ctr | U937.SNR.BRD0320.vs.Ctr | U937.Pvalue.BRD0320.vs.Ctr | U937.FDR.BRD0320.vs.Ctr | U937.BRD0705.vs.Ctr | U937.BRD0320.vs.Ctr | U937.BRD3731.vs.Ctr |
|-----|--------|-------------|----------------------|--------------------------|----------------------------|-------------------------|----------------------------|-------------------------|---------------------|---------------------|---------------------|
| 228 | 15160  | BLVRB       | 6.16                 | 6.93                     | 0.77                       | 8.917                   | 0                          | 0                       | 0                   | UP                  | 0                   |
| 229 | 12966  | MAP3K14     | 1.56                 | 2.34                     | 0.77                       | 6.508                   | 0.01                       | 0.01                    | 0                   | UP                  | 0                   |
| 230 | 29056  | MROH1       | 3.83                 | 4.6                      | 0.77                       | 3.586                   | 0                          | 0.01                    | 0                   | UP                  | 0                   |
| 231 | 568    | LOC149086   | 0.43                 | 1.19                     | 0.77                       | 3.35                    | 0                          | 0.01                    | 0                   | UP                  | 0                   |
| 232 | 16486  | NAGK        | 3.46                 | 4.23                     | 0.77                       | 5.913                   | 0                          | 0.01                    | 0                   | UP                  | UP                  |
| 233 | 20571  | ARHGAP31    | 1.39                 | 2.15                     | 0.77                       | 9.772                   | 0                          | 0.01                    | 0                   | UP                  | 0                   |
| 234 | 23999  | FKSG63      | 3.87                 | 4.63                     | 0.76                       | 2.412                   | 0.01                       | 0.01                    | UP                  | UP                  | 0                   |
| 235 | 13596  | METRNL      | 4.8                  | 5.56                     | 0.76                       | 4.187                   | 0.01                       | 0                       | 0                   | UP                  | 0                   |
| 236 | 21736  | CXCL2       | 0.48                 | 1.23                     | 0.76                       | 2.747                   | 0                          | 0                       | 0                   | UP                  | 0                   |
| 237 | 15389  | C5AR2       | 0.48                 | 1.24                     | 0.76                       | 1.957                   | 0                          | 0.01                    | 0                   | UP                  | 0                   |
| 238 | 28786  | AK127183    | 0.51                 | 1.27                     | 0.76                       | 4.245                   | 0.01                       | 0                       | 0                   | UP                  | 0                   |
| 239 | 20126  | UCN2        | 0.95                 | 1.7                      | 0.76                       | 2.523                   | 0.01                       | 0.01                    | 0                   | UP                  | 0                   |
| 240 | 21539  | RBM47       | 2.3                  | 3.07                     | 0.76                       | 5.037                   | 0.01                       | 0.01                    | 0                   | UP                  | 0                   |
| 241 | 8535   | GPR65       | 1.4                  | 2.17                     | 0.76                       | 1.548                   | 0                          | 0                       | 0                   | UP                  | UP                  |
| 242 | 27872  | KEL         | 1.05                 | 1.81                     | 0.76                       | 6.208                   | 0                          | 0.01                    | 0                   | UP                  | 0                   |
| 243 | 15158  | SERTAD1     | 2.2                  | 2.97                     | 0.76                       | 2.94                    | 0                          | 0                       | 0                   | UP                  | 0                   |
| 244 | 21201  | SDHAP1      | 2.94                 | 3.69                     | 0.76                       | 1.956                   | 0.01                       | 0                       | 0                   | UP                  | 0                   |
| 245 | 4174   | PHLDA2      | 1.55                 | 2.3                      | 0.75                       | 3.629                   | 0                          | 0                       | 0                   | UP                  | 0                   |
| 246 | 3695   | BLNK        | 2.12                 | 2.87                     | 0.75                       | 2.958                   | 0.01                       | 0.01                    | 0                   | UP                  | UP                  |
| 247 | 13143  | CUEDC1      | 2.15                 | 2.9                      | 0.75                       | 7.963                   | 0.01                       | 0.01                    | 0                   | UP                  | 0                   |
| 248 | 4177   | CARS        | 5                    | 5.75                     | 0.75                       | 8.421                   | 0                          | 0.01                    | 0                   | UP                  | 0                   |
| 249 | 435    | CNR2        | 0.45                 | 1.2                      | 0.75                       | 9.184                   | 0                          | 0.01                    | 0                   | UP                  | 0                   |
| 250 | 8375   | ZFYVE26     | 4.01                 | 4.76                     | 0.75                       | 4.02                    | 0                          | 0.01                    | 0                   | UP                  | UP                  |
| 251 | 3800   | NFKB2       | 3.47                 | 4.23                     | 0.75                       | 10.99                   | 0.01                       | 0                       | 0                   | UP                  | 0                   |
| 252 | 6099   | CLEC7A      | 0.56                 | 1.31                     | 0.75                       | 3.255                   | 0                          | 0                       | 0                   | UP                  | 0                   |
| 253 | 24776  | CD109       | 1.81                 | 2.56                     | 0.75                       | 8.622                   | 0                          | 0.01                    | 0                   | UP                  | 0                   |
| 254 | 8897   | NUDT14      | 3.42                 | 4.16                     | 0.74                       | 4.556                   | 0.01                       | 0.01                    | UP                  | UP                  | 0                   |
| 255 | 1419   | PHGDH       | 6.57                 | 7.31                     | 0.74                       | 10.92                   | 0.01                       | 0.01                    | 0                   | UP                  | UP                  |
| 256 | 10740  | NME3        | 1.04                 | 1.78                     | 0.74                       | 3.429                   | 0.01                       | 0                       | 0                   | UP                  | 0                   |
| 257 | 14728  | JUND        | 5.07                 | 5.81                     | 0.74                       | 29.3                    | 0.01                       | 0.01                    | 0                   | UP                  | 0                   |
| 258 | 17829  | GPR35       | 2.24                 | 2.98                     | 0.74                       | 11.96                   | 0.01                       | 0.01                    | 0                   | UP                  | 0                   |
| 259 | 27596  | TFEC        | 3.75                 | 4.5                      | 0.74                       | 5.28                    | 0                          | 0.01                    | 0                   | UP                  | UP                  |
| 260 | 30592  | SCML1       | 2.81                 | 3.56                     | 0.74                       | 5.296                   | 0                          | 0.01                    | 0                   | UP                  | UP                  |
| 261 | 2214   | SOAT1       | 3.91                 | 4.65                     | 0.74                       | 17.67                   | 0                          | 0.01                    | 0                   | UP                  | 0                   |
| 262 | 6953   | SLC41A2     | 0.82                 | 1.57                     | 0.74                       | 4.696                   | 0                          | 0                       | 0                   | UP                  | 0                   |
| 263 | 11404  | NOD2        | 1.16                 | 1.9                      | 0.73                       | 1.368                   | 0                          | 0                       | UP                  | UP                  | 0                   |
| 264 | 26624  | AP5Z1       | 3.52                 | 4.25                     | 0.73                       | 4.591                   | 0                          | 0.01                    | 0                   | UP                  | 0                   |

| #   | GeneID | Gene Symbol | U937.av.log2FPKM.Ctr | U937.av.log2FPKM.BRD0320 | <b>U937.log2FC.BRD0320.vs.Ctr</b> | U937.SNR.BRD0320.vs.Ctr | U937.Pvalue.BRD0320.vs.Ctr | U937.FDR.BRD0320.vs.Ctr | U937.BRD0705.vs.Ctr | <b>U937.BRD0320.vs.Ctr</b> | U937.BRD3731.vs.Ctr |
|-----|--------|-------------|----------------------|--------------------------|-----------------------------------|-------------------------|----------------------------|-------------------------|---------------------|----------------------------|---------------------|
| 265 | 14978  | FFAR2       | 0.93                 | 1.66                     | 0.73                              | 3.716                   | 0                          | 0                       | 0                   | UP                         | 0                   |
| 266 | 5204   | CORO1B      | 3.73                 | 4.46                     | 0.73                              | 24.05                   | 0                          | 0                       | 0                   | UP                         | 0                   |
| 267 | 3832   | SH3PXD2A    | 2.8                  | 3.53                     | 0.73                              | 4.681                   | 0                          | 0.01                    | 0                   | UP                         | DN                  |
| 268 | 12900  | TMEM106A    | 1.9                  | 2.63                     | 0.73                              | 2.659                   | 0.01                       | 0                       | 0                   | UP                         | 0                   |
| 269 | 285    | UQCRHL      | 1.4                  | 2.12                     | 0.72                              | 0.924                   | 0.01                       | 0                       | 0                   | UP                         | 0                   |
| 270 | 24824  | SNORD50B    | 2.16                 | 2.88                     | 0.72                              | 1.119                   | 0                          | 0.01                    | 0                   | UP                         | 0                   |
| 271 | 23177  | HBEGF       | 1.53                 | 2.25                     | 0.72                              | 3.276                   | 0.01                       | 0                       | 0                   | UP                         | 0                   |
| 272 | 14141  | MIDN        | 3.8                  | 4.52                     | 0.72                              | 15.11                   | 0                          | 0.01                    | 0                   | UP                         | 0                   |
| 273 | 19407  | NCF4        | 6.46                 | 7.17                     | 0.72                              | 5.67                    | 0                          | 0                       | 0                   | UP                         | 0                   |
| 274 | 1770   | SLC39A1     | 5.16                 | 5.88                     | 0.72                              | 22.02                   | 0                          | 0.01                    | 0                   | UP                         | 0                   |
| 275 | 16300  | EPAS1       | 2.5                  | 3.23                     | 0.72                              | 8.621                   | 0                          | 0                       | 0                   | UP                         | 0                   |
| 276 | 30774  | GPR34       | 0.91                 | 1.63                     | 0.72                              | 2.642                   | 0                          | 0.01                    | 0                   | UP                         | 0                   |
| 277 | 14244  | MAP2K2      | 6.5                  | 7.21                     | 0.71                              | 13.86                   | 0                          | 0.01                    | 0                   | UP                         | 0                   |
| 278 | 23746  | CD83        | 3.2                  | 3.91                     | 0.71                              | 15.3                    | 0.01                       | 0.01                    | 0                   | UP                         | 0                   |
| 279 | 24606  | VEGFA       | 5.03                 | 5.74                     | 0.71                              | 3.542                   | 0                          | 0                       | 0                   | UP                         | 0                   |
| 280 | 27688  | ATP6V1F     | 7.28                 | 7.98                     | 0.7                               | 11.87                   | 0.01                       | 0                       | 0                   | UP                         | 0                   |
| 281 | 9491   | SHC4        | 0.54                 | 1.24                     | 0.7                               | 3.121                   | 0.01                       | 0                       | 0                   | UP                         | 0                   |
| 282 | 196    | PGD         | 7.15                 | 7.85                     | 0.7                               | 7.86                    | 0.01                       | 0                       | 0                   | UP                         | 0                   |
| 283 | 23329  | SLC36A1     | 1.97                 | 2.68                     | 0.7                               | 3.497                   | 0.01                       | 0.01                    | 0                   | UP                         | 0                   |
| 284 | 20364  | MITF        | 1.46                 | 2.16                     | 0.7                               | 5.473                   | 0                          | 0.01                    | 0                   | UP                         | 0                   |
| 285 | 29351  | FAM214B     | 1.53                 | 2.24                     | 0.7                               | 2.475                   | 0.01                       | 0.01                    | 0                   | UP                         | 0                   |
| 286 | 19269  | CRYBB1      | 0.84                 | 1.53                     | 0.69                              | 2.824                   | 0                          | 0                       | 0                   | UP                         | 0                   |
| 287 | 11243  | PPP4C       | 6.38                 | 7.07                     | 0.69                              | 7.667                   | 0                          | 0                       | 0                   | UP                         | 0                   |
| 288 | 15781  | LAIR2       | 2.14                 | 2.83                     | 0.69                              | 2.576                   | 0.01                       | 0.01                    | 0                   | UP                         | 0                   |
| 289 | 17491  | NRP2        | 1.62                 | 2.31                     | 0.69                              | 3.452                   | 0.01                       | 0.01                    | 0                   | UP                         | 0                   |
| 290 | 26875  | EEPD1       | 2.73                 | 3.42                     | 0.69                              | 4.121                   | 0.01                       | 0                       | 0                   | UP                         | 0                   |
| 291 | 22839  | ZFYVE16     | 2.13                 | 2.82                     | 0.69                              | 5.222                   | 0                          | 0.01                    | 0                   | UP                         | 0                   |
| 292 | 18063  | RIN2        | 0.45                 | 1.15                     | 0.69                              | 2.654                   | 0                          | 0.01                    | 0                   | UP                         | 0                   |
| 293 | 18022  | KIF16B      | 1.98                 | 2.68                     | 0.69                              | 6.767                   | 0.01                       | 0.01                    | 0                   | UP                         | 0                   |
| 294 | 11054  | DCUN1D3     | 1.78                 | 2.47                     | 0.69                              | 2.721                   | 0                          | 0.01                    | 0                   | UP                         | 0                   |
| 295 | 3378   | C10orf54    | 4.15                 | 4.83                     | 0.68                              | 17.2                    | 0                          | 0.01                    | 0                   | UP                         | 0                   |
| 296 | 3733   | HPS1        | 5.29                 | 5.97                     | 0.68                              | 12.21                   | 0                          | 0                       | 0                   | UP                         | 0                   |
| 297 | 28005  | SLC4A2      | 4.73                 | 5.42                     | 0.68                              | 8.524                   | 0.01                       | 0                       | 0                   | UP                         | 0                   |
| 298 | 1800   | ZBTB7B      | 4.31                 | 4.99                     | 0.68                              | 7.799                   | 0.01                       | 0.01                    | 0                   | UP                         | 0                   |
| 299 | 14447  | ATG4D       | 3.76                 | 4.44                     | 0.68                              | 3.107                   | 0.01                       | 0.01                    | 0                   | UP                         | 0                   |
| 300 | 22885  | ARRDC3      | 0.93                 | 1.61                     | 0.68                              | 4.364                   | 0                          | 0                       | 0                   | UP                         | 0                   |
| 301 | 18199  | ASIP        | 0.23                 | 0.91                     | 0.68                              | 2.28                    | 0.01                       | 0.01                    | 0                   | UP                         | 0                   |

| #   | GeneID | Gene Symbol | U937.av.log2FPKM.Ctr | U937.av.log2FPKM.BRD0320 | <b>U937.log2FC.BRD0320.vs.Ctr</b> | U937.SNR.BRD0320.vs.Ctr | U937.Pvalue.BRD0320.vs.Ctr | U937.FDR.BRD0320.vs.Ctr | U937.BRD0705.vs.Ctr | <b>U937.BRD0320.vs.Ctr</b> | U937.BRD3731.vs.Ctr |
|-----|--------|-------------|----------------------|--------------------------|-----------------------------------|-------------------------|----------------------------|-------------------------|---------------------|----------------------------|---------------------|
| 302 | 16028  | GREB1       | 1.76                 | 2.44                     | 0.68                              | 6.281                   | 0                          | 0.01                    | 0                   | UP                         | 0                   |
| 303 | 15513  | SNORD35B    | 2.9                  | 3.58                     | 0.68                              | 1.154                   | 0                          | 0.01                    | 0                   | UP                         | UP                  |
| 304 | 30307  | SNHG7       | 5.08                 | 5.75                     | 0.67                              | 2.959                   | 0                          | 0.01                    | 0                   | UP                         | 0                   |
| 305 | 2043   | FCGR2B      | 2.63                 | 3.3                      | 0.67                              | 2.372                   | 0                          | 0                       | 0                   | UP                         | 0                   |
| 306 | 15943  | UBE2M       | 6.36                 | 7.03                     | 0.67                              | 15.43                   | 0                          | 0                       | 0                   | UP                         | 0                   |
| 307 | 9983   | CSK         | 7.1                  | 7.77                     | 0.67                              | 14.24                   | 0.01                       | 0.01                    | 0                   | UP                         | 0                   |
| 308 | 19747  | BHLHE40     | 4.85                 | 5.52                     | 0.67                              | 10                      | 0.01                       | 0                       | 0                   | UP                         | 0                   |
| 309 | 29598  | PSAT1       | 6.11                 | 6.78                     | 0.67                              | 6.264                   | 0.01                       | 0.01                    | 0                   | UP                         | UP                  |
| 310 | 14872  | PLEKHF1     | 3.06                 | 3.74                     | 0.67                              | 3.107                   | 0.01                       | 0.01                    | 0                   | UP                         | 0                   |
| 311 | 1272   | SARS        | 5.33                 | 6                        | 0.67                              | 6.756                   | 0                          | 0.01                    | 0                   | UP                         | 0                   |
| 312 | 23590  | HEIH        | 3.65                 | 4.33                     | 0.67                              | 5.892                   | 0                          | 0                       | 0                   | UP                         | 0                   |
| 313 | 11781  | FOXF1       | 2.74                 | 3.41                     | 0.67                              | 3.235                   | 0.01                       | 0                       | 0                   | UP                         | 0                   |
| 314 | 17175  | CYTIP       | 2.48                 | 3.15                     | 0.67                              | 4.307                   | 0.01                       | 0                       | 0                   | UP                         | 0                   |
| 315 | 20854  | TM4SF1      | 0.59                 | 1.27                     | 0.67                              | 1.823                   | 0.01                       | 0.01                    | 0                   | UP                         | 0                   |
| 316 | 17604  | CYP27A1     | 0.06                 | 0.73                     | 0.67                              | 3.534                   | 0                          | 0.01                    | 0                   | UP                         | 0                   |
| 317 | 1327   | ADORA3      | 0.92                 | 1.59                     | 0.67                              | 4.481                   | 0                          | 0.01                    | 0                   | UP                         | 0                   |
| 318 | 19713  | TYMP        | 3.21                 | 3.88                     | 0.66                              | 16.64                   | 0.01                       | 0.01                    | 0                   | UP                         | 0                   |
| 319 | 11155  | AQP8        | 0.33                 | 0.98                     | 0.66                              | 2.689                   | 0                          | 0                       | 0                   | UP                         | 0                   |
| 320 | 3806   | C10orf95    | 0.42                 | 1.07                     | 0.66                              | 1.438                   | 0                          | 0.01                    | 0                   | UP                         | 0                   |
| 321 | 19420  | CYTH4       | 2.35                 | 3.02                     | 0.66                              | 5.971                   | 0                          | 0.01                    | 0                   | UP                         | 0                   |
| 322 | 7302   | IL17D       | 2.24                 | 2.9                      | 0.66                              | 3.267                   | 0.01                       | 0.01                    | 0                   | UP                         | 0                   |
| 323 | 23570  | SQSTM1      | 5.81                 | 6.47                     | 0.66                              | 8.741                   | 0                          | 0.01                    | 0                   | UP                         | 0                   |
| 324 | 27275  | SEMA3C      | 0.27                 | 0.92                     | 0.66                              | 4.195                   | 0                          | 0                       | 0                   | UP                         | 0                   |
| 325 | 10795  | CEMP1       | 1.97                 | 2.63                     | 0.66                              | 1.897                   | 0                          | 0                       | 0                   | UP                         | 0                   |
| 326 | 16186  | ALK         | 0                    | 0.66                     | 0.66                              | 3.678                   | 0                          | 0                       | 0                   | UP                         | 0                   |
| 327 | 21228  | MFI2        | 3.13                 | 3.78                     | 0.65                              | 6.601                   | 0                          | 0.01                    | 0                   | UP                         | 0                   |
| 328 | 14905  | PEPD        | 5.12                 | 5.77                     | 0.65                              | 7.587                   | 0                          | 0                       | 0                   | UP                         | 0                   |
| 329 | 655    | STK40       | 3.85                 | 4.5                      | 0.65                              | 6.678                   | 0                          | 0                       | 0                   | UP                         | 0                   |
| 330 | 1630   | ECM1        | 4.14                 | 4.79                     | 0.65                              | 5.243                   | 0.01                       | 0                       | 0                   | UP                         | 0                   |
| 331 | 7732   | FARP1       | 2.16                 | 2.81                     | 0.65                              | 7.64                    | 0.01                       | 0                       | 0                   | UP                         | UP                  |
| 332 | 20544  | ATP6V1A     | 4.52                 | 5.17                     | 0.65                              | 7.291                   | 0                          | 0                       | 0                   | UP                         | UP                  |
| 333 | 8631   | MOAP1       | 3.58                 | 4.24                     | 0.65                              | 4.135                   | 0                          | 0.01                    | 0                   | UP                         | 0                   |
| 334 | 20077  | CCRL2       | 1.59                 | 2.25                     | 0.65                              | 1.623                   | 0.01                       | 0.01                    | 0                   | UP                         | 0                   |
| 335 | 1973   | CD244       | 3.41                 | 4.06                     | 0.65                              | 13.59                   | 0.01                       | 0.01                    | 0                   | UP                         | 0                   |
| 336 | 19691  | CRELD2      | 4.22                 | 4.86                     | 0.64                              | 8.909                   | 0                          | 0                       | 0                   | UP                         | 0                   |
| 337 | 5041   | FLRT1       | 1.29                 | 1.92                     | 0.64                              | 2.706                   | 0                          | 0.01                    | 0                   | UP                         | 0                   |
| 338 | 19317  | OSM         | 0.4                  | 1.04                     | 0.64                              | 2.512                   | 0.01                       | 0.01                    | 0                   | UP                         | 0                   |

| #   | GeneID | Gene Symbol | U937.av.log2FPKM.Ctr | U937.av.log2FPKM.BRD0320 | <b>U937.log2FC.BRD0320.vs.Ctr</b> | U937.SNR.BRD0320.vs.Ctr | U937.Pvalue.BRD0320.vs.Ctr | U937.FDR.BRD0320.vs.Ctr | U937.BRD0705.vs.Ctr | <b>U937.BRD0320.vs.Ctr</b> | U937.BRD3731.vs.Ctr |
|-----|--------|-------------|----------------------|--------------------------|-----------------------------------|-------------------------|----------------------------|-------------------------|---------------------|----------------------------|---------------------|
| 339 | 3379   | PSAP        | 6.94                 | 7.58                     | 0.64                              | 7.384                   | 0.01                       | 0                       | 0                   | UP                         | UP                  |
| 340 | 1638   | CTSS        | 4.24                 | 4.88                     | 0.64                              | 17.75                   | 0                          | 0                       | 0                   | UP                         | UP                  |
| 341 | 24774  | SLC17A5     | 4.13                 | 4.76                     | 0.64                              | 6.293                   | 0                          | 0                       | 0                   | UP                         | UP                  |
| 342 | 24461  | PPARD       | 5.14                 | 5.77                     | 0.64                              | 7.648                   | 0.01                       | 0.01                    | 0                   | UP                         | 0                   |
| 343 | 1367   | OLFML3      | 0.53                 | 1.17                     | 0.64                              | 3.973                   | 0.01                       | 0                       | 0                   | UP                         | 0                   |
| 344 | 14149  | NDUFS7      | 6.12                 | 6.76                     | 0.63                              | 11.07                   | 0.01                       | 0.01                    | 0                   | UP                         | 0                   |
| 345 | 19203  | CHCHD10     | 6.69                 | 7.33                     | 0.63                              | 6.141                   | 0                          | 0                       | 0                   | UP                         | 0                   |
| 346 | 14291  | LONP1       | 6.87                 | 7.51                     | 0.63                              | 12.06                   | 0                          | 0.01                    | 0                   | UP                         | 0                   |
| 347 | 15256  | PLAUR       | 4.58                 | 5.21                     | 0.63                              | 4.764                   | 0.01                       | 0                       | 0                   | UP                         | 0                   |
| 348 | 18188  | NECAB3      | 2.66                 | 3.3                      | 0.63                              | 9.118                   | 0                          | 0                       | 0                   | UP                         | 0                   |
| 349 | 4273   | SMPD1       | 3.56                 | 4.19                     | 0.63                              | 6.139                   | 0.01                       | 0.01                    | 0                   | UP                         | 0                   |
| 350 | 12758  | RARA        | 3.86                 | 4.49                     | 0.63                              | 4.363                   | 0.01                       | 0.01                    | 0                   | UP                         | 0                   |
| 351 | 15767  | MBOAT7      | 5.64                 | 6.27                     | 0.63                              | 7.834                   | 0                          | 0.01                    | 0                   | UP                         | 0                   |
| 352 | 10722  | TPSD1       | 0.76                 | 1.39                     | 0.63                              | 1.477                   | 0.01                       | 0                       | 0                   | UP                         | 0                   |
| 353 | 24445  | C6orf1      | 3.8                  | 4.43                     | 0.63                              | 3.505                   | 0.01                       | 0                       | 0                   | UP                         | 0                   |
| 354 | 13075  | ITGA3       | 1.93                 | 2.56                     | 0.63                              | 3.814                   | 0                          | 0                       | 0                   | UP                         | 0                   |
| 355 | 8364   | ATP6V1D     | 4.39                 | 5.03                     | 0.63                              | 3.378                   | 0                          | 0.01                    | 0                   | UP                         | 0                   |
| 356 | 7559   | DLEU7       | 1.61                 | 2.23                     | 0.62                              | 1.632                   | 0.01                       | 0                       | 0                   | UP                         | 0                   |
| 357 | 14368  | TIMM44      | 5.37                 | 5.99                     | 0.62                              | 12.9                    | 0                          | 0.01                    | 0                   | UP                         | 0                   |
| 358 | 15851  | ZNF787      | 4.79                 | 5.41                     | 0.62                              | 6.219                   | 0.01                       | 0                       | 0                   | UP                         | 0                   |
| 359 | 15379  | NPAS1       | 2.94                 | 3.56                     | 0.62                              | 4.084                   | 0                          | 0                       | 0                   | UP                         | UP                  |
| 360 | 651    | MAP7D1      | 5.59                 | 6.21                     | 0.62                              | 8.669                   | 0.01                       | 0                       | 0                   | UP                         | 0                   |
| 361 | 15613  | SIGLEC17P   | 3.42                 | 4.04                     | 0.62                              | 5.599                   | 0.01                       | 0.01                    | 0                   | UP                         | UP                  |
| 362 | 26616  | TTYH3       | 5.89                 | 6.52                     | 0.62                              | 11.91                   | 0.01                       | 0                       | 0                   | UP                         | 0                   |
| 363 | 31635  | FAM50A      | 5.92                 | 6.54                     | 0.62                              | 11.87                   | 0                          | 0                       | 0                   | UP                         | 0                   |
| 364 | 26948  | OGDH        | 4.94                 | 5.56                     | 0.62                              | 24.81                   | 0                          | 0                       | 0                   | UP                         | 0                   |
| 365 | 31041  | LINC00891   | 1.01                 | 1.63                     | 0.62                              | 2.065                   | 0.01                       | 0.01                    | 0                   | UP                         | 0                   |
| 366 | 18910  | CSTB        | 7.01                 | 7.63                     | 0.62                              | 7.269                   | 0.01                       | 0                       | 0                   | UP                         | 0                   |
| 367 | 12185  | GAS7        | 5.2                  | 5.81                     | 0.62                              | 25.96                   | 0.01                       | 0.01                    | 0                   | UP                         | 0                   |
| 368 | 11502  | SLC38A7     | 2.25                 | 2.87                     | 0.62                              | 5.334                   | 0.01                       | 0.01                    | 0                   | UP                         | UP                  |
| 369 | 22960  | STARD4      | 3.13                 | 3.75                     | 0.62                              | 3.497                   | 0.01                       | 0.01                    | 0                   | UP                         | UP                  |
| 370 | 8262   | LGALS3      | 4.59                 | 5.22                     | 0.62                              | 2.785                   | 0                          | 0.01                    | 0                   | UP                         | 0                   |
| 371 | 20290  | SPATA12     | 1.22                 | 1.84                     | 0.62                              | 1.362                   | 0                          | 0                       | 0                   | UP                         | 0                   |
| 372 | 13475  | SOCS3       | 0.4                  | 1.02                     | 0.62                              | 4.056                   | 0.01                       | 0                       | 0                   | UP                         | 0                   |
| 373 | 21193  | SDHAP2      | 2.46                 | 3.08                     | 0.62                              | 2.253                   | 0                          | 0                       | 0                   | UP                         | 0                   |
| 374 | 4990   | B3GAT3      | 4.06                 | 4.67                     | 0.61                              | 4.624                   | 0                          | 0.01                    | UP                  | UP                         | UP                  |
| 375 | 30342  | DPP7        | 6.29                 | 6.9                      | 0.61                              | 11.26                   | 0.01                       | 0                       | 0                   | UP                         | 0                   |

| #   | GeneID | Gene Symbol | U937.av.log2FPKM.Ctr | U937.av.log2FPKM.BRD0320 | U937.log2FC.BRD0320.vs.Ctr | U937.SNR.BRD0320.vs.Ctr | U937.Pvalue.BRD0320.vs.Ctr | U937.FDR.BRD0320.vs.Ctr | U937.BRD0705.vs.Ctr | U937.BRD0320.vs.Ctr | U937.BRD3731.vs.Ctr |
|-----|--------|-------------|----------------------|--------------------------|----------------------------|-------------------------|----------------------------|-------------------------|---------------------|---------------------|---------------------|
| 376 | 31615  | IRAK1       | 7.47                 | 8.08                     | 0.61                       | 10                      | 0.01                       | 0.01                    | 0                   | UP                  | 0                   |
| 377 | 8895   | GPR132      | 2.51                 | 3.11                     | 0.61                       | 3.372                   | 0                          | 0                       | 0                   | UP                  | 0                   |
| 378 | 14694  | MRPL34      | 5.82                 | 6.43                     | 0.61                       | 6.863                   | 0                          | 0.01                    | 0                   | UP                  | 0                   |
| 379 | 12654  | MYO19       | 4.12                 | 4.73                     | 0.61                       | 4.707                   | 0.01                       | 0.01                    | 0                   | UP                  | 0                   |
| 380 | 15433  | GRIN2D      | 2.11                 | 2.71                     | 0.61                       | 1.895                   | 0.01                       | 0.01                    | 0                   | UP                  | 0                   |
| 381 | 9373   | VPS18       | 4.03                 | 4.64                     | 0.61                       | 6.146                   | 0                          | 0                       | 0                   | UP                  | 0                   |
| 382 | 281    | PLEKHM2     | 4.73                 | 5.34                     | 0.61                       | 15.71                   | 0.01                       | 0                       | 0                   | UP                  | 0                   |
| 383 | 14435  | ICAM1       | 3.84                 | 4.45                     | 0.61                       | 6.252                   | 0.01                       | 0.01                    | 0                   | UP                  | 0                   |
| 384 | 19867  | COLQ        | 3.1                  | 3.71                     | 0.61                       | 3.844                   | 0.01                       | 0.01                    | 0                   | UP                  | 0                   |
| 385 | 31653  | MPP1        | 5.78                 | 6.38                     | 0.61                       | 8.697                   | 0.01                       | 0                       | 0                   | UP                  | 0                   |
| 386 | 11667  | HP          | 1.16                 | 1.76                     | 0.6                        | 2.12                    | 0                          | 0.01                    | UP                  | UP                  | UP                  |
| 387 | 20921  | PTX3        | 1.7                  | 2.3                      | 0.6                        | 3.177                   | 0                          | 0.01                    | 0                   | UP                  | UP                  |
| 388 | 14534  | JUNB        | 4.66                 | 5.26                     | 0.6                        | 3.305                   | 0                          | 0                       | 0                   | UP                  | 0                   |
| 389 | 19710  | LMF2        | 4.35                 | 4.95                     | 0.6                        | 5.75                    | 0.01                       | 0                       | 0                   | UP                  | 0                   |
| 390 | 11810  | MVD         | 3.84                 | 4.44                     | 0.6                        | 5.728                   | 0.01                       | 0                       | 0                   | UP                  | 0                   |
| 391 | 26954  | MYO1G       | 6.41                 | 7.01                     | 0.6                        | 8.946                   | 0.01                       | 0.01                    | 0                   | UP                  | DN                  |
| 392 | 9365   | RMDN3       | 3.72                 | 4.33                     | 0.6                        | 3.918                   | 0                          | 0                       | 0                   | UP                  | 0                   |
| 393 | 17875  | TRIB3       | 5.62                 | 6.22                     | 0.6                        | 8.395                   | 0.01                       | 0.01                    | 0                   | UP                  | 0                   |
| 394 | 24194  | C6orf47     | 2.89                 | 3.49                     | 0.6                        | 5.071                   | 0                          | 0                       | 0                   | UP                  | 0                   |
| 395 | 27232  | POR         | 4.4                  | 5                        | 0.6                        | 8.049                   | 0                          | 0                       | 0                   | UP                  | 0                   |
| 396 | 13449  | MFSD11      | 2.05                 | 2.64                     | 0.6                        | 3.5                     | 0.01                       | 0.01                    | 0                   | UP                  | 0                   |
| 397 | 7061   | PLBD2       | 3.66                 | 4.26                     | 0.6                        | 2.831                   | 0                          | 0                       | 0                   | UP                  | 0                   |
| 398 | 27698  | STRIP2      | 3.15                 | 3.76                     | 0.6                        | 5.638                   | 0                          | 0                       | 0                   | UP                  | UP                  |
| 399 | 19295  | RHBDD3      | 2.77                 | 3.35                     | 0.59                       | 2.888                   | 0                          | 0                       | 0                   | UP                  | 0                   |
| 400 | 22786  | HEXB        | 6.84                 | 7.43                     | 0.59                       | 5.002                   | 0                          | 0                       | 0                   | UP                  | 0                   |
| 401 | 5228   | TCIRG1      | 4.9                  | 5.49                     | 0.59                       | 2.07                    | 0.01                       | 0.01                    | 0                   | UP                  | 0                   |
| 402 | 8488   | IRF2BPL     | 2.66                 | 3.25                     | 0.59                       | 9.032                   | 0.01                       | 0                       | 0                   | UP                  | 0                   |
| 403 | 15762  | TFPT        | 4.31                 | 4.89                     | 0.59                       | 17.61                   | 0                          | 0                       | 0                   | UP                  | 0                   |
| 404 | 13902  | SIGLEC15    | 1.23                 | 1.82                     | 0.59                       | 3.451                   | 0                          | 0.01                    | 0                   | UP                  | 0                   |
| 405 | 19478  | GGA1        | 4.24                 | 4.83                     | 0.59                       | 2.652                   | 0.01                       | 0.01                    | 0                   | UP                  | 0                   |
| 406 | 30580  | AP1S2       | 5.4                  | 6                        | 0.59                       | 6.154                   | 0                          | 0                       | 0                   | UP                  | 0                   |
| 407 | 31166  | GLA         | 6                    | 6.59                     | 0.59                       | 5.708                   | 0.01                       | 0.01                    | 0                   | UP                  | 0                   |
| 408 | 1861   | AF086351    | 4.61                 | 5.2                      | 0.59                       | 5.529                   | 0                          | 0.01                    | 0                   | UP                  | 0                   |
| 409 | 12235  | TTC19       | 4.32                 | 4.91                     | 0.59                       | 17.76                   | 0                          | 0                       | 0                   | UP                  | 0                   |
| 410 | 14607  | ILVBL       | 4.43                 | 5.01                     | 0.58                       | 4.74                    | 0                          | 0.01                    | 0                   | UP                  | UP                  |
| 411 | 5460   | SMCO4       | 3.41                 | 3.99                     | 0.58                       | 1.229                   | 0                          | 0.01                    | 0                   | UP                  | 0                   |
| 412 | 28725  | CCNE2       | 3.74                 | 4.31                     | 0.58                       | 1.639                   | 0.01                       | 0                       | 0                   | UP                  | 0                   |

| #   | GeneID | Gene Symbol | U937.av.log2FPKM.Ctr | U937.av.log2FPKM.BRD0320 | <b>U937.log2FC.BRD0320.vs.Ctr</b> | U937.SNR.BRD0320.vs.Ctr | U937.Pvalue.BRD0320.vs.Ctr | U937.FDR.BRD0320.vs.Ctr | U937.BRD0705.vs.Ctr | <b>U937.BRD0320.vs.Ctr</b> | U937.BRD3731.vs.Ctr |
|-----|--------|-------------|----------------------|--------------------------|-----------------------------------|-------------------------|----------------------------|-------------------------|---------------------|----------------------------|---------------------|
| 413 | 4716   | PEX16       | 3.37                 | 3.95                     | 0.58                              | 4.36                    | 0                          | 0.01                    | 0                   | UP                         | 0                   |
| 414 | 22808  | ZBED3       | 2.57                 | 3.15                     | 0.58                              | 3.337                   | 0                          | 0.01                    | 0                   | UP                         | UP                  |
| 415 | 3005   | BC078172    | 1.13                 | 1.71                     | 0.58                              | 1.358                   | 0.01                       | 0                       | 0                   | UP                         | 0                   |
| 416 | 8473   | BATF        | 4.97                 | 5.55                     | 0.58                              | 7.254                   | 0.01                       | 0                       | 0                   | UP                         | 0                   |
| 417 | 16493  | DYSF        | 3.16                 | 3.73                     | 0.58                              | 7.477                   | 0                          | 0.01                    | 0                   | UP                         | 0                   |
| 418 | 19536  | ATF4        | 7.7                  | 8.28                     | 0.58                              | 14.85                   | 0                          | 0                       | 0                   | UP                         | 0                   |
| 419 | 27432  | PILRA       | 2.31                 | 2.9                      | 0.58                              | 2.781                   | 0                          | 0.01                    | 0                   | UP                         | 0                   |
| 420 | 27586  | GPR85       | 1.5                  | 2.09                     | 0.58                              | 2.706                   | 0                          | 0                       | 0                   | UP                         | 0                   |
| 421 | 18656  | SAMSN1      | 2.33                 | 2.91                     | 0.58                              | 3.751                   | 0.01                       | 0                       | 0                   | UP                         | DN                  |
| 422 | 15824  | UBE2S       | 7.25                 | 7.81                     | 0.57                              | 17.16                   | 0.01                       | 0.01                    | 0                   | UP                         | 0                   |
| 423 | 19161  | SDF2L1      | 4.75                 | 5.33                     | 0.57                              | 4.116                   | 0                          | 0.01                    | 0                   | UP                         | UP                  |
| 424 | 6378   | TUBA1C      | 7.99                 | 8.56                     | 0.57                              | 4.534                   | 0                          | 0.01                    | 0                   | UP                         | 0                   |
| 425 | 3714   | UBTD1       | 3.43                 | 4                        | 0.57                              | 3.054                   | 0                          | 0.01                    | 0                   | UP                         | 0                   |
| 426 | 9890   | CLN6        | 6.23                 | 6.8                      | 0.57                              | 5.991                   | 0.01                       | 0                       | 0                   | UP                         | 0                   |
| 427 | 26608  | SNX8        | 3.8                  | 4.37                     | 0.57                              | 11.97                   | 0                          | 0.01                    | 0                   | UP                         | 0                   |
| 428 | 11177  | CLN3        | 4.73                 | 5.3                      | 0.57                              | 12.15                   | 0                          | 0.01                    | 0                   | UP                         | 0                   |
| 429 | 28876  | WDYHV1      | 3.04                 | 3.6                      | 0.57                              | 2.37                    | 0                          | 0.01                    | 0                   | UP                         | 0                   |
| 430 | 15793  | NLRP7       | 1.48                 | 2.05                     | 0.57                              | 8.476                   | 0                          | 0.01                    | 0                   | UP                         | UP                  |
| 431 | 15835  | ZNF524      | 3.6                  | 4.17                     | 0.57                              | 2.226                   | 0.01                       | 0.01                    | 0                   | UP                         | 0                   |
| 432 | 14468  | LDLR        | 3.87                 | 4.44                     | 0.57                              | 6.81                    | 0.01                       | 0.01                    | 0                   | UP                         | 0                   |
| 433 | 17859  | NEU4        | 0.25                 | 0.82                     | 0.57                              | 2.207                   | 0.01                       | 0                       | 0                   | UP                         | 0                   |
| 434 | 19566  | ACO2        | 5.61                 | 6.18                     | 0.57                              | 8.24                    | 0                          | 0                       | 0                   | UP                         | 0                   |
| 435 | 22187  | FAM198B     | 0.38                 | 0.96                     | 0.57                              | 4.896                   | 0                          | 0.01                    | 0                   | UP                         | 0                   |
| 436 | 9338   | THBS1       | 0.3                  | 0.87                     | 0.57                              | 3.938                   | 0.01                       | 0.01                    | 0                   | UP                         | 0                   |
| 437 | 14196  | GADD45B     | 4.34                 | 4.91                     | 0.57                              | 5.761                   | 0                          | 0                       | 0                   | UP                         | 0                   |
| 438 | 2772   | KMO         | 0.24                 | 0.81                     | 0.57                              | 3.058                   | 0.01                       | 0.01                    | 0                   | UP                         | 0                   |
| 439 | 27469  | VGFB        | 0.74                 | 1.31                     | 0.57                              | 2.277                   | 0                          | 0                       | 0                   | UP                         | 0                   |
| 440 | 27579  | DOCK4       | 0.44                 | 1.01                     | 0.57                              | 4.928                   | 0.01                       | 0.01                    | 0                   | UP                         | 0                   |
| 441 | 3433   | ZSWIM8      | 2.77                 | 3.34                     | 0.57                              | 2.045                   | 0                          | 0                       | 0                   | UP                         | 0                   |
| 442 | 1029   | CTH         | 3                    | 3.57                     | 0.57                              | 2.775                   | 0                          | 0                       | 0                   | UP                         | 0                   |
| 443 | 18781  | OLIG1       | 3.48                 | 4.05                     | 0.57                              | 4.299                   | 0.01                       | 0.01                    | 0                   | UP                         | 0                   |
| 444 | 18443  | SNAI1       | 1.94                 | 2.5                      | 0.56                              | 3.767                   | 0.01                       | 0                       | UP                  | UP                         | 0                   |
| 445 | 2491   | CR1         | 1.25                 | 1.8                      | 0.56                              | 3.209                   | 0                          | 0                       | 0                   | UP                         | 0                   |
| 446 | 943    | C8B         | 0.5                  | 1.06                     | 0.56                              | 3.251                   | 0                          | 0.01                    | 0                   | UP                         | UP                  |
| 447 | 29050  | CYC1        | 7.27                 | 7.83                     | 0.56                              | 14.13                   | 0                          | 0.01                    | 0                   | UP                         | 0                   |
| 448 | 17260  | GAD1        | 1.44                 | 2                        | 0.56                              | 1.44                    | 0                          | 0                       | 0                   | UP                         | 0                   |
| 449 | 487    | DHDDS       | 3.78                 | 4.35                     | 0.56                              | 9.241                   | 0                          | 0                       | 0                   | UP                         | 0                   |



| #   | GeneID | Gene Symbol | U937.av.log2FPKM.Ctr | U937.av.log2FPKM.BRD0320 | <b>U937.log2FC.BRD0320.vs.Ctr</b> | U937.SNR.BRD0320.vs.Ctr | U937.Pvalue.BRD0320.vs.Ctr | U937.FDR.BRD0320.vs.Ctr | U937.BRD0705.vs.Ctr | <b>U937.BRD0320.vs.Ctr</b> | U937.BRD3731.vs.Ctr |
|-----|--------|-------------|----------------------|--------------------------|-----------------------------------|-------------------------|----------------------------|-------------------------|---------------------|----------------------------|---------------------|
| 450 | 8095   | GZMB        | 0                    | 0.56                     | 0.56                              | 5.645                   | 0                          | 0                       | 0                   | UP                         | 0                   |
| 451 | 15610  | SIGLEC9     | 1.6                  | 2.15                     | 0.56                              | 1.207                   | 0                          | 0.01                    | 0                   | UP                         | 0                   |
| 452 | 6233   | BHLHE41     | 1.73                 | 2.29                     | 0.56                              | 4.339                   | 0.01                       | 0.01                    | 0                   | UP                         | 0                   |
| 453 | 7385   | LINC00426   | 2.47                 | 3.04                     | 0.56                              | 3.803                   | 0.01                       | 0                       | 0                   | UP                         | 0                   |
| 454 | 871    | TTC39A      | 0.37                 | 0.93                     | 0.56                              | 1.563                   | 0.01                       | 0.01                    | 0                   | UP                         | 0                   |
| 455 | 5424   | FZD4        | 0.66                 | 1.22                     | 0.56                              | 3.63                    | 0.01                       | 0.01                    | 0                   | UP                         | 0                   |
| 456 | 11819  | CDT1        | 5.13                 | 5.68                     | 0.55                              | 8.114                   | 0                          | 0.01                    | 0                   | UP                         | 0                   |
| 457 | 9871   | SNORD16     | 4.15                 | 4.69                     | 0.55                              | 1.721                   | 0.01                       | 0                       | 0                   | UP                         | 0                   |
| 458 | 10691  | FAM195A     | 5.11                 | 5.66                     | 0.55                              | 5.666                   | 0.01                       | 0.01                    | 0                   | UP                         | UP                  |
| 459 | 29068  | SLC52A2     | 5.39                 | 5.94                     | 0.55                              | 15.18                   | 0.01                       | 0.01                    | 0                   | UP                         | 0                   |
| 460 | 2665   | MRPL55      | 5.75                 | 6.31                     | 0.55                              | 15.37                   | 0                          | 0                       | 0                   | UP                         | 0                   |
| 461 | 13364  | NAT9        | 2.89                 | 3.44                     | 0.55                              | 1.915                   | 0                          | 0.01                    | 0                   | UP                         | UP                  |
| 462 | 15620  | NKG7        | 7.66                 | 8.21                     | 0.55                              | 16.3                    | 0.01                       | 0                       | 0                   | UP                         | UP                  |
| 463 | 59     | GLTPD1      | 4.47                 | 5.03                     | 0.55                              | 5.769                   | 0                          | 0.01                    | 0                   | UP                         | 0                   |
| 464 | 22823  | ARSB        | 3.02                 | 3.57                     | 0.55                              | 2.972                   | 0                          | 0                       | 0                   | UP                         | 0                   |
| 465 | 23589  | MGAT1       | 5.27                 | 5.83                     | 0.55                              | 10.78                   | 0.01                       | 0.01                    | 0                   | UP                         | 0                   |
| 466 | 14179  | AP3D1       | 5.65                 | 6.21                     | 0.55                              | 17.17                   | 0.01                       | 0.01                    | 0                   | UP                         | 0                   |
| 467 | 21731  | PPBP        | 0.09                 | 0.64                     | 0.55                              | 3.272                   | 0                          | 0                       | 0                   | UP                         | 0                   |
| 468 | 8005   | TCRDV2J2    | 0.27                 | 0.81                     | 0.55                              | 2.511                   | 0                          | 0.01                    | 0                   | UP                         | 0                   |
| 469 | 20439  | CLDND1      | 4.95                 | 5.5                      | 0.55                              | 6.096                   | 0                          | 0                       | 0                   | UP                         | DN                  |
| 470 | 22223  | MSMO1       | 3.9                  | 4.45                     | 0.55                              | 3.374                   | 0.01                       | 0                       | 0                   | UP                         | UP                  |
| 471 | 28419  | ADAM9       | 5.17                 | 5.72                     | 0.55                              | 7.119                   | 0                          | 0.01                    | 0                   | UP                         | UP                  |
| 472 | 28008  | TMUB1       | 4.46                 | 5                        | 0.54                              | 4.341                   | 0.01                       | 0.01                    | 0                   | UP                         | 0                   |
| 473 | 14137  | SBNO2       | 3.84                 | 4.39                     | 0.54                              | 3.911                   | 0                          | 0                       | 0                   | UP                         | 0                   |
| 474 | 31602  | IDH3G       | 5.61                 | 6.16                     | 0.54                              | 5.377                   | 0                          | 0.01                    | 0                   | UP                         | 0                   |
| 475 | 12094  | TNFSF12     | 2.59                 | 3.13                     | 0.54                              | 2.445                   | 0                          | 0                       | 0                   | UP                         | 0                   |
| 476 | 15377  | AP2S1       | 7.29                 | 7.83                     | 0.54                              | 5.387                   | 0.01                       | 0.01                    | 0                   | UP                         | 0                   |
| 477 | 30576  | CA5BP1      | 3.43                 | 3.97                     | 0.54                              | 3.579                   | 0                          | 0                       | 0                   | UP                         | 0                   |
| 478 | 12861  | NAGLU       | 3.68                 | 4.21                     | 0.54                              | 6.626                   | 0                          | 0                       | 0                   | UP                         | UP                  |
| 479 | 20673  | MGLL        | 4.66                 | 5.21                     | 0.54                              | 15.51                   | 0                          | 0                       | 0                   | UP                         | 0                   |
| 480 | 15396  | NAPA        | 6.09                 | 6.63                     | 0.54                              | 22.07                   | 0                          | 0.01                    | 0                   | UP                         | 0                   |
| 481 | 14683  | F2RL3       | 1.94                 | 2.49                     | 0.54                              | 1.943                   | 0.01                       | 0                       | 0                   | UP                         | DN                  |
| 482 | 24507  | ZFAND3      | 4.97                 | 5.51                     | 0.54                              | 10.74                   | 0.01                       | 0.01                    | 0                   | UP                         | 0                   |
| 483 | 12894  | VAT1        | 7.5                  | 8.04                     | 0.54                              | 6.785                   | 0.01                       | 0.01                    | 0                   | UP                         | 0                   |
| 484 | 2285   | FAM129A     | 3.63                 | 4.17                     | 0.54                              | 7.346                   | 0                          | 0.01                    | 0                   | UP                         | 0                   |
| 485 | 573    | COL16A1     | 0.42                 | 0.95                     | 0.54                              | 3.822                   | 0.01                       | 0.01                    | 0                   | UP                         | 0                   |
| 486 | 23476  | CPEB4       | 1.51                 | 2.05                     | 0.54                              | 4.815                   | 0.01                       | 0.01                    | 0                   | UP                         | 0                   |

| #   | GeneID | Gene Symbol | U937.av.log2FPKM.Ctr | U937.av.log2FPKM.BRD0320 | <b>U937.log2FC.BRD0320.vs.Ctr</b> | U937.SNR.BRD0320.vs.Ctr | U937.Pvalue.BRD0320.vs.Ctr | U937.FDR.BRD0320.vs.Ctr | U937.BRD0705.vs.Ctr | <b>U937.BRD0320.vs.Ctr</b> | U937.BRD3731.vs.Ctr |
|-----|--------|-------------|----------------------|--------------------------|-----------------------------------|-------------------------|----------------------------|-------------------------|---------------------|----------------------------|---------------------|
| 487 | 14326  | C3          | 0.78                 | 1.32                     | 0.54                              | 3.458                   | 0                          | 0                       | 0                   | UP                         | 0                   |
| 488 | 25292  | AGPAT4      | 2.49                 | 3.03                     | 0.54                              | 1.852                   | 0                          | 0                       | 0                   | UP                         | 0                   |
| 489 | 17177  | ACVR1       | 2.29                 | 2.82                     | 0.54                              | 2.889                   | 0                          | 0.01                    | 0                   | UP                         | 0                   |
| 490 | 29588  | GCNT1       | 3.32                 | 3.85                     | 0.54                              | 6.326                   | 0                          | 0.01                    | 0                   | UP                         | 0                   |
| 491 | 795    | SNORD38B    | 1.43                 | 1.97                     | 0.54                              | 1.013                   | 0                          | 0.01                    | 0                   | UP                         | 0                   |
| 492 | 14375  | RPS28       | 9.69                 | 10.22                    | 0.53                              | 12.8                    | 0                          | 0                       | 0                   | UP                         | 0                   |
| 493 | 30362  | TOR4A       | 3.6                  | 4.14                     | 0.53                              | 4.259                   | 0                          | 0                       | 0                   | UP                         | 0                   |
| 494 | 15532  | AP2A1       | 5.5                  | 6.04                     | 0.53                              | 11.37                   | 0                          | 0                       | 0                   | UP                         | 0                   |
| 495 | 15836  | ZNF865      | 2.77                 | 3.31                     | 0.53                              | 3.795                   | 0                          | 0                       | 0                   | UP                         | 0                   |
| 496 | 10693  | RHOT2       | 4.99                 | 5.52                     | 0.53                              | 4.356                   | 0.01                       | 0                       | 0                   | UP                         | 0                   |
| 497 | 4127   | TOLLIP      | 3.49                 | 4.02                     | 0.53                              | 19.28                   | 0                          | 0                       | 0                   | UP                         | 0                   |
| 498 | 24145  | PPP1R18     | 5.22                 | 5.75                     | 0.53                              | 11.94                   | 0                          | 0                       | 0                   | UP                         | 0                   |
| 499 | 29045  | GRINA       | 6.88                 | 7.41                     | 0.53                              | 10.16                   | 0.01                       | 0.01                    | 0                   | UP                         | 0                   |
| 500 | 23541  | RMND5B      | 3.05                 | 3.58                     | 0.53                              | 4.641                   | 0.01                       | 0.01                    | 0                   | UP                         | 0                   |
| 501 | 12335  | MAPK7       | 2                    | 2.54                     | 0.53                              | 2.232                   | 0                          | 0.01                    | 0                   | UP                         | 0                   |
| 502 | 2251   | MR1         | 2.34                 | 2.87                     | 0.53                              | 2.444                   | 0                          | 0                       | 0                   | UP                         | 0                   |
| 503 | 27582  | IFRD1       | 4.08                 | 4.61                     | 0.53                              | 5.381                   | 0                          | 0.01                    | 0                   | UP                         | 0                   |
| 504 | 4321   | LMO1        | 3.26                 | 3.79                     | 0.52                              | 3.184                   | 0                          | 0.01                    | 0                   | UP                         | 0                   |
| 505 | 15833  | ZNF579      | 3.27                 | 3.79                     | 0.52                              | 5.167                   | 0                          | 0.01                    | 0                   | UP                         | 0                   |
| 506 | 14169  | KLF16       | 4.52                 | 5.04                     | 0.52                              | 12.47                   | 0.01                       | 0                       | 0                   | UP                         | 0                   |
| 507 | 15816  | TMEM150B    | 0.74                 | 1.27                     | 0.52                              | 1.214                   | 0                          | 0                       | 0                   | UP                         | 0                   |
| 508 | 28399  | BRF2        | 2.72                 | 3.24                     | 0.52                              | 2.961                   | 0                          | 0                       | 0                   | UP                         | 0                   |
| 509 | 18900  | CBS         | 3.51                 | 4.02                     | 0.52                              | 3.94                    | 0.01                       | 0.01                    | 0                   | UP                         | 0                   |
| 510 | 30202  | UCK1        | 3.27                 | 3.79                     | 0.52                              | 5.613                   | 0                          | 0.01                    | 0                   | UP                         | 0                   |
| 511 | 14240  | EEF2        | 9.93                 | 10.45                    | 0.52                              | 17.78                   | 0                          | 0.01                    | 0                   | UP                         | 0                   |
| 512 | 14418  | FBXL12      | 3.72                 | 4.24                     | 0.52                              | 4.31                    | 0.01                       | 0.01                    | 0                   | UP                         | 0                   |
| 513 | 15154  | C19orf47    | 3.4                  | 3.91                     | 0.52                              | 5.297                   | 0                          | 0                       | 0                   | UP                         | 0                   |
| 514 | 17640  | CHPF        | 4.01                 | 4.54                     | 0.52                              | 16.91                   | 0.01                       | 0                       | 0                   | UP                         | 0                   |
| 515 | 27182  | LIMK1       | 4.14                 | 4.66                     | 0.52                              | 6.609                   | 0                          | 0.01                    | 0                   | UP                         | 0                   |
| 516 | 14681  | NWD1        | 1.82                 | 2.34                     | 0.52                              | 8.081                   | 0.01                       | 0.01                    | 0                   | UP                         | 0                   |
| 517 | 21407  | SLC2A9      | 2.94                 | 3.46                     | 0.52                              | 5.936                   | 0                          | 0                       | 0                   | UP                         | 0                   |
| 518 | 17206  | FAP         | 4.07                 | 4.6                      | 0.52                              | 4.106                   | 0.01                       | 0.01                    | 0                   | UP                         | 0                   |
| 519 | 2420   | SOX13       | 2.28                 | 2.8                      | 0.52                              | 2.452                   | 0.01                       | 0                       | 0                   | UP                         | 0                   |
| 520 | 6036   | SLC2A3      | 3.14                 | 3.67                     | 0.52                              | 6.195                   | 0                          | 0                       | 0                   | UP                         | 0                   |
| 521 | 24610  | C6orf223    | 2.14                 | 2.66                     | 0.52                              | 3.845                   | 0.01                       | 0                       | 0                   | UP                         | 0                   |
| 522 | 1841   | RIT1        | 3.28                 | 3.79                     | 0.52                              | 3.012                   | 0                          | 0                       | 0                   | UP                         | 0                   |
| 523 | 569    | LOC284551   | 0.94                 | 1.46                     | 0.52                              | 1.78                    | 0                          | 0                       | 0                   | UP                         | 0                   |

| #   | GeneID | Gene Symbol  | U937.av.log2FPKM.Ctr | U937.av.log2FPKM.BRD0320 | <b>U937.log2FC.BRD0320.vs.Ctr</b> | U937.SNR.BRD0320.vs.Ctr | U937.Pvalue.BRD0320.vs.Ctr | U937.FDR.BRD0320.vs.Ctr | U937.BRD0705.vs.Ctr | <b>U937.BRD0320.vs.Ctr</b> | U937.BRD3731.vs.Ctr |
|-----|--------|--------------|----------------------|--------------------------|-----------------------------------|-------------------------|----------------------------|-------------------------|---------------------|----------------------------|---------------------|
| 524 | 23018  | SNX24        | 0.8                  | 1.31                     | 0.52                              | 3.118                   | 0                          | 0                       | 0                   | UP                         | 0                   |
| 525 | 803    | UROD         | 5.71                 | 6.21                     | 0.51                              | 6.22                    | 0.01                       | 0                       | 0                   | UP                         | 0                   |
| 526 | 107    | LOC115110    | 0.5                  | 1                        | 0.51                              | 3.406                   | 0                          | 0                       | 0                   | UP                         | UP                  |
| 527 | 1820   | GBA          | 4.73                 | 5.24                     | 0.51                              | 5.304                   | 0.01                       | 0.01                    | 0                   | UP                         | 0                   |
| 528 | 4731   | ZNF408       | 2.27                 | 2.78                     | 0.51                              | 6.18                    | 0.01                       | 0.01                    | 0                   | UP                         | 0                   |
| 529 | 7747   | GPR183       | 5.16                 | 5.67                     | 0.51                              | 3.779                   | 0                          | 0.01                    | 0                   | UP                         | DN                  |
| 530 | 10827  | TNFRSF12A    | 2.94                 | 3.46                     | 0.51                              | 2.282                   | 0.01                       | 0.01                    | 0                   | UP                         | 0                   |
| 531 | 11117  | GGA2         | 5.58                 | 6.1                      | 0.51                              | 12.51                   | 0.01                       | 0                       | 0                   | UP                         | UP                  |
| 532 | 12695  | SRCIN1       | 1.54                 | 2.05                     | 0.51                              | 2.104                   | 0.01                       | 0.01                    | 0                   | UP                         | 0                   |
| 533 | 12969  | PLEKHM1      | 2.61                 | 3.12                     | 0.51                              | 3.115                   | 0                          | 0.01                    | 0                   | UP                         | 0                   |
| 534 | 14589  | GIPC1        | 3.81                 | 4.32                     | 0.51                              | 4.214                   | 0.01                       | 0                       | 0                   | UP                         | 0                   |
| 535 | 15375  | SLC1A5       | 7.63                 | 8.14                     | 0.51                              | 26.03                   | 0.01                       | 0.01                    | 0                   | UP                         | 0                   |
| 536 | 15823  | RPL28        | 9.14                 | 9.65                     | 0.51                              | 7.536                   | 0.01                       | 0.01                    | 0                   | UP                         | 0                   |
| 537 | 16886  | PAX8         | 0.43                 | 0.94                     | 0.51                              | 1.713                   | 0                          | 0.01                    | 0                   | UP                         | 0                   |
| 538 | 16887  | LOC654433    | 0.01                 | 0.52                     | 0.51                              | 5.418                   | 0.01                       | 0                       | 0                   | UP                         | 0                   |
| 539 | 17631  | DNAJB2       | 2.45                 | 2.96                     | 0.51                              | 4.278                   | 0.01                       | 0                       | 0                   | UP                         | 0                   |
| 540 | 18803  | KCNE1        | 0.68                 | 1.19                     | 0.51                              | 12.89                   | 0                          | 0                       | 0                   | UP                         | 0                   |
| 541 | 19609  | PACSIN2      | 3.77                 | 4.28                     | 0.51                              | 7.126                   | 0                          | 0                       | 0                   | UP                         | 0                   |
| 542 | 21078  | AP2M1        | 6.92                 | 7.43                     | 0.51                              | 18.22                   | 0.01                       | 0                       | 0                   | UP                         | 0                   |
| 543 | 23730  | TMEM170B     | 2.44                 | 2.96                     | 0.51                              | 5.906                   | 0.01                       | 0                       | 0                   | UP                         | 0                   |
| 544 | 24721  | RAB23        | 2.48                 | 2.99                     | 0.51                              | 4.886                   | 0.01                       | 0.01                    | 0                   | UP                         | 0                   |
| 545 | 27689  | LOC100130705 | 1.15                 | 1.66                     | 0.51                              | 1.302                   | 0                          | 0                       | 0                   | UP                         | 0                   |
| 546 | 29942  | SLC31A1      | 4.12                 | 4.63                     | 0.51                              | 7.257                   | 0                          | 0.01                    | 0                   | UP                         | UP                  |
| 547 | 30365  | NOXA1        | 1.66                 | 2.17                     | 0.51                              | 2.035                   | 0.01                       | 0                       | 0                   | UP                         | 0                   |
| 548 | 31612  | TMEM187      | 2.41                 | 2.93                     | 0.51                              | 3.051                   | 0                          | 0                       | 0                   | UP                         | UP                  |
| 549 | 686    | RRAGC        | 4.77                 | 5.28                     | 0.5                               | 4.185                   | 0.01                       | 0.01                    | 0                   | UP                         | 0                   |
| 550 | 2634   | ACBD3        | 4.47                 | 4.97                     | 0.5                               | 6.773                   | 0.01                       | 0                       | 0                   | UP                         | 0                   |
| 551 | 3121   | NRP1         | 2.22                 | 2.72                     | 0.5                               | 4.676                   | 0                          | 0                       | 0                   | UP                         | 0                   |
| 552 | 11615  | NQO1         | 4.27                 | 4.77                     | 0.5                               | 2.81                    | 0                          | 0                       | 0                   | UP                         | 0                   |
| 553 | 13571  | FASN         | 6.31                 | 6.81                     | 0.5                               | 2.522                   | 0.01                       | 0                       | 0                   | UP                         | 0                   |
| 554 | 15791  | FCAR         | 3.5                  | 4                        | 0.5                               | 3.607                   | 0                          | 0.01                    | 0                   | UP                         | DN                  |
| 555 | 17880  | SRXN1        | 4.07                 | 4.58                     | 0.5                               | 7.63                    | 0                          | 0                       | 0                   | UP                         | 0                   |
| 556 | 28982  | SLC45A4      | 2.88                 | 3.39                     | 0.5                               | 4.327                   | 0                          | 0.01                    | 0                   | UP                         | 0                   |

**Table S10. Top enriched gene sets from the functional groups predicted in BRD0705 vs DMSO enrichment map. Significance of the enrichment based on Fisher exact test.**

| Functional Category                 | Gene Set Name                                                     | Node Label | Trend BRD0705 vs DMSO | Enrichment Score | P-Value  | FDR      | Size GeneSet |
|-------------------------------------|-------------------------------------------------------------------|------------|-----------------------|------------------|----------|----------|--------------|
| Induced Differentiation             | ADDA_ERYTHROID_DIFFERENTIATION_BY_HEMIN                           | D1         | GSK3A1 UP             | 1.130            | 5.73E-07 | 2.55E-04 | 73           |
|                                     | APPEL_IMATINIB_RESPONSE                                           | D2         | GSK3A1 UP             | 1.351            | 8.18E-07 | 3.25E-04 | 33           |
|                                     | DMAP_GMP_UP                                                       | D3         | GSK3A1 UP             | -0.742           | 1.85E-10 | 9.19E-07 | 686          |
|                                     | DMAP_HSC_eERY_DN*                                                 | D4         | GSK3A1 UP             | -1.101           | 3.70E-02 | 3.60E-01 | 573          |
|                                     | DMAP_MONO.vs.HSC_UP*                                              | D5         | GSK3A1 UP             | 1.047            | 6.90E-10 | 1.71E-06 | 459          |
|                                     | GERY_CEBP_TARGETS                                                 | D6         | GSK3A1 UP             | 1.140            | 8.54E-06 | 2.12E-03 | 126          |
|                                     | KRIGE_RESPONSE_TO_TOSEDOSTAT_24HR_UP                              | D7         | GSK3A1 UP             | -1.320           | 4.84E-05 | 6.67E-03 | 783          |
|                                     | KRIGE_RESPONSE_TO_TOSEDOSTAT_6HR_UP                               | D8         | GSK3A1 UP             | -1.156           | 2.15E-04 | 1.72E-02 | 953          |
|                                     | MARTENS_TRETINOIN_RESPONSE_UP                                     | D9         | GSK3A1 UP             | 0.794            | 3.98E-02 | 3.69E-01 | 857          |
| Mitochondrial Metabolism Activation | REACTOME_RESPIRATORY_ELECTRON_TRANSPORT_ATP_SYNTHESIS_BY_CHEMIOSM | M1         | GSK3A1 UP             | 2.323            | 0.00E+00 | 2.17E-04 | 77           |
|                                     | OTIC_COUPLING_AND_HEAT_PRODUCTION_BY_UNCOUPLING_PROTEINS          | M2         | GSK3A1 UP             | 2.283            | 0.00E+00 | 2.55E-04 | 64           |
|                                     | REACTOME_RESPIRATORY_ELECTRON_TRANSPORT                           | M3         | GSK3A1 UP             | 2.044            | 0.00E+00 | 4.26E-03 | 111          |
|                                     | REACTOME_TCA_CYCLE_AND_RESPIRATORY_ELECTRON_TRANSPORT             | M4         | GSK3A1 UP             | 1.914            | 0.00E+00 | 1.27E-02 | 16           |
|                                     | MOOHA_TCA                                                         | M5         | GSK3A1 UP             | 1.648            | 0.00E+00 | 6.41E-02 | 391          |
|                                     | MOOHA_HUMAN_MITOCHONDRIA                                          | M6         | GSK3A1 UP             | 1.534            | 0.00E+00 | 1.06E-01 | 405          |
|                                     | MOOHA_MITOCHONDRIA_GENE_MCDULE                                    | M7         | GSK3A1 UP             | 1.527            | 0.00E+00 | 1.08E-01 | 208          |
| GSK3 Pathway Inhibition             | WONG_MITOCHONDRIA                                                 | G1         | GSK3A1 DN             | -0.787           | 0.00E+00 | 1.74E-02 | 374          |
|                                     | WANG_RESPONSE_TO_GSK3_INHIBITOR_SB216763_DN                       | G2         | GSK3A1 DN             | -1.288           | 0.00E+00 | 2.95E-16 | 267          |
|                                     | CHIR_VS_CTL_GSE54056_DN                                           | G3         | GSK3A1 UP             | -0.928           | 1.79E-03 | 5.86E-02 | 397          |
|                                     | WANG_RESPONSE_TO_GSK3_INHIBITOR_SB216763_UP                       | G4         | GSK3A1 UP             | 1.118            | 7.53E-04 | 3.93E-02 | 500          |
|                                     | STEGMAIER_GSK3A_KD_UP                                             | G5         | GSK3A1 UP             | 1.293            | 1.20E-05 | 2.59E-03 | 500          |
| Loss of Stemness                    | TAKEDA_TARGETS_OF_NUP98_HOXA9_FUSION_8D_DN                        | S1         | GSK3A1 UP             | 1.403            | 8.80E-05 | 9.49E-03 | 205          |
|                                     | JAATINEN_HEMATOPOIETIC_STEM_CELL_DN                               | S2         | GSK3A1 UP             | 1.473            | 1.55E-03 | 5.52E-02 | 226          |
|                                     | DANG_REGULATED_BY_MYC_DN                                          | S3         | GSK3A1 UP             | 1.416            | 2.01E-03 | 6.44E-02 | 243          |
|                                     | GAL_LEUKEMIC_STEM_CELL_DN                                         | S4         | GSK3A1 UP             | 1.363            | 2.04E-03 | 6.50E-02 | 244          |
|                                     | HOXA9_DN_V1_UP                                                    | S5         | GSK3A1 DN             | -1.680           | 4.26E-08 | 2.69E-06 | 194          |
|                                     | BENPORATH_SOX2_TARGETS                                            | S6         | GSK3A1 DN             | -1.085           | 1.11E-05 | 9.57E-04 | 734          |
|                                     | IVANOVA_HEMATOPOIESIS_STEM_CELL_AND_PROGENITOR                    | S7         | GSK3A1 DN             | -1.118           | 5.53E-06 | 5.33E-04 | 681          |
|                                     | LIU_SOX4_TARGETS_UP                                               | S8         | GSK3A1 DN             | -1.721           | 3.30E-06 | 3.76E-04 | 137          |
|                                     | SANSOM_APC_MYC_TARGETS                                            | S9         | GSK3A1 DN             | -1.452           | 4.57E-04 | 2.20E-02 | 217          |
|                                     | TAKEDA_TARGETS_OF_NUP98_HOXA9_FUSION_10D_UP                       | S10        | GSK3A1 DN             | -1.053           | 1.79E-06 | 2.35E-04 | 194          |
| ODONNELL_TARGETS_OF_MYC_AND_TFR3_UP | S11                                                               | GSK3A1 DN  | -1.454                | 4.73E-06         | 4.66E-04 | 83       |              |

**Table S11. Cytogenetics, molecular and clinical characteristics of patient samples used in this study.**

n/a: data not available

| # ID | Age | Sex | Diagnosis                    | Disease Status | FLT3     | NPM1                     | Cytogenetics                                       | molecular characteristics                                                                           |
|------|-----|-----|------------------------------|----------------|----------|--------------------------|----------------------------------------------------|-----------------------------------------------------------------------------------------------------|
| 1    | 11  | M   | AML                          | new            | FLT3-ITD | n/a                      | 46XY, add(6)(q21), add(9)(p24)                     | SETD2 D2438fs, DMD Y2111C                                                                           |
| 2    | 78  | F   | AML                          | new            | FLT3-ITD | W288fs* <sup>&gt;9</sup> | 46 XX                                              | ATM L439P, CEBPA Q305P, GATA1 V349M, TET2 G1861R                                                    |
| 3    | 71  | F   | AML                          | new            | WT       | WT                       | 46, XX, del(7)(q22q34), -18<add(21)(q22), +mar[18} | n/a                                                                                                 |
| 4    | 52  | M   | AML with erythroid dysplasia | new, prior MDS | WT       | WT                       | complex karyotype                                  | TP53 L194R                                                                                          |
| 5    | 64  | M   | AML                          | prior MDS      | WT       | WT                       | 46 XY                                              | BCOR T1566fs*, DNMT3A R882H, KIT D816V, KRAS G13C, KRAS G13D, NRAS G13D, PTPN11 A72V, STAG2 M255fs* |
